# Supplementary material for: Human Cytomegalovirus Infection Elicits Global Changes in Host Transcription by RNA Polymerases I, II, and III
Source: Viruses. 2022 Apr 9;14(4):779. doi: 10.3390/v14040779 (PMC9026722; doi:10.3390/v14040779)
Supplement: Supplementary file 1 [file viruses-14-00779-s001.zip › Supplementary Data File.xlsx]

## Sheet: PRO-Seq Stats
	Total deduplicated reads	Total read correction factor	Human mapped reads	CMV mapped reads	Spike-in mapped reads	Corrected human reads	Corrected CMV reads	Corrected Spike-in reads	Spike-in correction factor	Final correction factor	Corrected CMV/Host reads (%)
0 h	24032388	0.902978	22188117	1869	1842402	2.00354e+07	1687.67	1.66365e+06	0.623385	0.562903	0.00842343
0 h Flavo	27862556	0.778848	26001667	2562	1858327	2.02514e+07	1995.41	1.44736e+06	0.716544	0.558079	0.00985321
4 h	22535391	0.962961	20992735	166438	1376218	2.02152e+07	160273	1.32524e+06	0.782568	0.753582	0.792836
4 h Flavo	24262954	0.894397	22677124	78595	1507235	2.02823e+07	70295.1	1.34807e+06	0.769319	0.688077	0.346583
12 h	21597080	1.0048	19555730	486635	1554715	1.96496e+07	488970	1.56217e+06	0.663878	0.667063	2.48845
12 h Flavo	23939169	0.906494	22374652	263020	1301497	2.02825e+07	238426	1.1798e+06	0.879043	0.796847	1.17553
24 h	22282962	0.97387	20647163	767183	868616	2.01077e+07	747137	845919	1.226	1.19396	3.71568
24 h Flavo	23298240	0.931431	21700419	321835	1275986	2.02124e+07	299767	1.18849e+06	0.872612	0.812778	1.48308
48 h	19253300	1.12712	16795549	2062556	395195	1.89305e+07	2.32474e+06	445431	2.32829	2.62426	12.2804
48 h Flavo	18569577	1.16862	17084720	972593	512264	1.99655e+07	1.13659e+06	598640	1.73242	2.02453	5.69277
72 h	20574495	1.05474	16172621	3912718	489156	1.70579e+07	4.12689e+06	515932	2.01014	2.12017	24.1935
72 h Flavo	18793106	1.15472	15216556	2969130	607420	1.75708e+07	3.4285e+06	701398	1.47861	1.70737	19.5125
72 h PFA	15324872	1.41604	14317968	444112	562792	2.02749e+07	628883	796939	1.30135	1.84277	3.10178
72 h Flavo PFA	21483825	1.0101	20334276	258276	891273	2.05396e+07	260883	900271	1.15198	1.16361	1.27015

## Sheet: DMSO Pause Reg
Chromosome	DMSO_Pause_region_left	DMSO_Pause_region_right	Genename	Strength	Strand	Uninf_Pause_region	4hpi_Pause_region	12hpi_Pause_region	24hpi_Pause_region	48hpi_Pause_region	72hpi_Pause_region	Genename2	72hpi_PFA_Pause_region	4hpi_Pause_region/Uninf_Pause_region	12hpi_Pause_region/Uninf_Pause_region	24hpi_Pause_region/Uninf_Pause_region	48hpi_Pause_region/Uninf_Pause_region	72hpi_Pause_region/Uninf_Pause_region	72hpi_PFA_Pause_region/Uninf_Pause_region
chr12	121038901	121039051	OASL	100	-	3.94032	259.232	652.388	466.839	125.964	67.8454	OASL	199.022	65.7896	165.567	118.477	31.968	17.2182	50.5091
chr2	6877705	6877855	RSAD2	217	+	5.06613	430.295	783.132	711.601	498.609	186.575	RSAD2	431.215	84.9356	154.582	140.462	98.4201	36.8279	85.1172
chr17	47733164	47733314	TBX21	56	+	0.562903	6.02866	48.6956	22.6853	15.7455	10.6008	TBX21	16.5852	10.7099	86.508	40.3005	27.972	18.8324	29.4637
chr14	94110680	94110830	IFI27	116	+	0	23.3611	82.7159	101.487	78.7277	33.9227	IFI27	75.5548	23.3611	82.7159	101.487	78.7277	33.9227	75.5548
chr3	172523376	172523526	TNFSF10	37	-	4.50322	64.8081	326.194	131.336	41.9881	23.3219	TNFSF10	38.6988	14.3915	72.4357	29.1649	9.32402	5.17894	8.59358
chr1	78620386	78620536	IFI44L	57	+	2.81451	162.02	159.428	91.935	91.849	63.6051	IFI44L	64.498	57.566	56.645	32.6647	32.6341	22.599	22.9162
chr10	89327929	89328079	IFIT3	307	+	19.7016	675.963	1002.6	628.023	196.819	108.129	IFIT3	342.761	34.3101	50.8893	31.8768	9.99	5.48834	17.3976
chr10	43076995	43077145	RET	60	+	6.19193	51.2436	254.151	121.784	31.4911	29.6824	RET	81.0832	8.27587	41.0455	19.6682	5.08583	4.79372	13.095
chr18	62325236	62325386	TNFRSF11A	66	+	0.562903	5.27508	22.6802	35.8188	26.2426	36.0429	TNFRSF11A	27.642	9.37121	40.2915	63.6323	46.6201	64.0304	49.1062
chr1	226223440	226223590	MIXL1	29	+	0.562903	0.753582	20.679	31.043	5.24852	10.6008	MIXL1	11.0568	1.33874	36.7363	55.148	9.32402	18.8324	19.6425
chr7	155457486	155457636	EN2	205	+	1.68871	12.0573	60.0357	25.0732	15.7455	44.5236	EN2	31.3276	7.13995	35.5512	14.8475	9.32398	26.3655	18.5512
chr2	240820138	240820288	KIF1A	194	-	2.81451	8.28941	98.7254	91.935	76.1035	131.45	KIF1A	252.464	2.94524	35.0773	32.6647	27.0397	46.7044	89.7009
chr12	112938408	112938558	OAS3	58	+	4.50322	282.593	152.758	148.051	73.4792	36.0429	OAS3	70.0264	62.7535	33.9219	32.8767	16.317	8.00381	15.5503
chr10	89301977	89302127	IFIT2	283	+	45.5951	1633.01	1518.24	930.096	433.003	256.54	IFIT2	438.586	35.8155	33.2983	20.399	9.4967	5.62648	9.61915
chr22	48575321	48575471	TAFA5	64	+	0.562903	9.04299	18.6778	26.2671	18.3698	50.8841	TAFA5	42.3844	16.0649	33.1812	46.6636	32.634	90.3959	75.2961
chr4	88457056	88457206	HERC5	383	+	33.2113	770.161	985.253	505.045	251.929	152.652	HERC5	385.145	23.1897	29.6662	15.207	7.58564	4.59639	11.5968
chr5	524371	524521	SLC9A3	29	-	1.12581	6.02866	32.6861	26.2671	7.87277	6.36051	SLC9A3	11.0568	5.35495	29.0334	23.3317	6.99298	5.64972	9.8212
chr4	88378745	88378895	HERC6	33	+	9.56935	277.318	245.479	154.021	36.7396	23.3219	HERC6	62.6552	28.9798	25.6526	16.0952	3.8393	2.43715	6.54749
chr1	242524620	242524770	PLD5	34	-	1.12581	0.753582	28.0167	13.1336	10.497	21.2017	PLD5	1.8428	0.669369	24.8858	11.6659	9.32395	18.8324	1.63687
chr1	89198828	89198978	GBP4	39	-	6.75484	194.424	160.095	71.6377	49.8609	14.8412	GBP4	49.7556	28.7829	23.7008	10.6054	7.38151	2.19712	7.36592
chr14	100375344	100375494	WARS	235	-	32.6484	438.585	758.451	405.947	131.213	114.489	WARS	230.35	13.4336	23.2309	12.4339	4.01897	3.50673	7.05548
chr18	4455196	4455346	DLGAP1	26	-	0.562903	0.753582	12.6742	9.55169	13.1213	14.8412	DLGAP1	16.5852	1.33874	22.5158	16.9686	23.3101	26.3655	29.4637
chr10	96720439	96720589	PIK3AP1	58	-	1.68871	7.53582	35.3544	29.849	13.1213	10.6008	PIK3AP1	25.7992	4.46247	20.9357	17.6756	7.77001	6.27745	15.2775
chr2	236168308	236168458	GBX2	103	-	0	3.01433	20.679	21.4913	44.6124	29.6824	GBX2	29.4848	3.01433	20.679	21.4913	44.6124	29.6824	29.4848
chr11	13009246	13009396	RASSF10	115	+	3.94032	13.5645	80.0476	76.4135	55.1094	53.0042	RASSF10	47.9128	3.44249	20.315	19.3927	13.986	13.4518	12.1596
chr18	78979362	78979512	SALL3	43	+	0.562903	0	11.3401	13.1336	7.87277	29.6824	SALL3	3.6856	0	20.1457	23.3319	13.986	52.7309	6.54749
chr8	60281319	60281469	CA8	28	-	2.25161	12.0573	44.0262	19.1034	7.87277	14.8412	CA8	11.0568	5.35497	19.5532	8.48433	3.49651	6.59137	4.91062
chr2	10721556	10721706	ATP6V1C2	28	+	1.12581	3.01433	21.346	25.0732	26.2426	42.4034	ATP6V1C2	18.428	2.67748	18.9606	22.2713	23.31	37.6648	16.3687
chr4	8871757	8871907	HMX1	112	-	0	0	18.0107	32.2369	41.9881	42.4034	HMX1	47.9128	0	18.0107	32.2369	41.9881	42.4034	47.9128
chr8	143878391	143878541	EPPK1	60	-	0.562903	2.26075	10.006	10.7456	13.1213	42.4034	EPPK1	3.6856	4.01623	17.7757	19.0896	23.3101	75.3299	6.54749
chr15	88638893	88639043	ISG20	34	+	7.31774	67.8224	114.068	63.2799	31.4911	38.163	ISG20	33.1704	9.26822	15.5879	8.64746	4.30339	5.21513	4.53287
chr4	74794486	74794636	BTC	26	-	1.12581	14.3181	17.3436	8.35773	7.87277	4.24034	BTC	0	12.718	15.4054	7.42375	6.99298	3.76648	0
chr5	60844184	60844334	ELOVL7	139	-	2.81451	15.0716	42.025	46.5645	65.6064	69.9656	ELOVL7	38.6988	5.35496	14.9316	16.5444	23.3101	24.8589	13.7497
chr9	5450473	5450623	CD274	71	+	21.3903	212.51	314.187	125.366	31.4911	21.2017	CD274	64.498	9.93488	14.6883	5.86088	1.47221	0.991183	3.01529
chr12	112978452	112978602	OAS2	89	+	18.5758	348.155	270.161	175.512	123.34	46.6437	OAS2	101.354	18.7424	14.5437	9.44842	6.63982	2.51099	5.45624
chr1	6419836	6419986	HES2	32	-	2.81451	5.27508	40.6909	29.849	26.2426	27.5622	HES2	22.1136	1.87424	14.4575	10.6054	9.32404	9.79289	7.857
chr6	116512257	116512407	TRAPPC3L	39	-	8.44354	70.8367	116.069	68.0558	15.7455	10.6008	TRAPPC3L	27.642	8.38946	13.7465	8.0601	1.8648	1.25549	3.27375
chr11	22193004	22193154	ANO5	29	+	1.12581	5.27508	15.3425	26.2671	15.7455	14.8412	ANO5	31.3276	4.68559	13.628	23.3317	13.9859	13.1827	27.8267
chr4	25862858	25863008	SEL1L3	88	-	1.12581	9.04299	15.3425	28.6551	20.9941	50.8841	SEL1L3	23.9564	8.03243	13.628	25.4529	18.648	45.1978	21.2793
chr13	36432420	36432570	CCNA1	50	+	0	3.01433	13.3413	5.9698	2.62426	14.8412	CCNA1	5.5284	3.01433	13.3413	5.9698	2.62426	14.8412	5.5284
chr21	31558993	31559143	TIAM1	65	-	3.37742	10.5502	44.0262	42.9826	36.7396	31.8025	TIAM1	77.3976	3.12375	13.0355	12.7265	10.878	9.41621	22.9162
chrX	102155887	102156037	BEX5	37	-	0.562903	0.753582	7.3377	14.3275	15.7455	12.721	BEX5	16.5852	1.33874	13.0355	25.4529	27.972	22.5989	29.4637
chr1	39491559	39491709	BMP8A	24	+	1.12581	6.78224	14.6754	22.6853	26.2426	27.5622	BMP8A	16.5852	6.02432	13.0354	20.1502	23.31	24.4821	14.7318
chr9	69325145	69325295	FAM189A2	95	+	1.12581	6.02866	14.6754	16.7155	18.3698	27.5622	FAM189A2	22.1136	5.35495	13.0354	14.8475	16.317	24.4821	19.6424
chr17	181564	181714	DOC2B	46	-	1.68871	0	21.346	28.6551	23.6183	40.2832	DOC2B	35.0132	0	12.6404	16.9686	13.986	23.8544	20.7337
chr13	42992171	42992321	EPSTI1	73	-	21.3903	461.192	262.823	121.784	62.9822	50.8841	EPSTI1	58.9696	21.5608	12.287	5.69342	2.94443	2.37884	2.75684
chr2	136118074	136118224	CXCR4	165	-	0	9.04299	12.0071	23.8792	31.4911	31.8025	CXCR4	64.498	9.04299	12.0071	23.8792	31.4911	31.8025	64.498
chr18	46333934	46334084	RNF165	26	+	0.562903	0.753582	6.67063	20.2973	5.24852	10.6008	RNF165	22.1136	1.33874	11.8504	36.0583	9.32402	18.8324	39.2849
chr14	30874480	30874630	COCH	25	+	1.68871	5.27508	19.3448	44.1766	20.9941	12.721	COCH	11.0568	3.12373	11.4554	26.16	12.432	7.53297	6.54748
chr4	168318678	168318828	DDX60	109	-	36.5887	342.126	408.243	367.74	115.467	95.4076	DDX60	191.651	9.35059	11.1576	10.0506	3.15581	2.60757	5.23798
chr21	41361957	41362107	MX2	252	+	54.6016	1049.74	606.361	265.059	120.716	84.8068	MX2	200.865	19.2254	11.1052	4.85442	2.21085	1.55319	3.67874
chr16	22814096	22814246	HS3ST2	37	+	5.06613	13.5645	54.0321	29.849	26.2426	16.9614	HS3ST2	31.3276	2.67749	10.6654	5.89187	5.18001	3.348	6.18373
chr22	45009899	45010049	PHF21B	27	-	1.68871	3.76791	18.0107	11.9396	13.1213	14.8412	PHF21B	25.7992	2.23124	10.6654	7.07025	7.77001	8.78848	15.2775
chr3	133038276	133038426	TMEM108	36	+	1.68871	2.26075	18.0107	27.4611	34.1153	31.8025	TMEM108	25.7992	1.33874	10.6654	16.2616	20.202	18.8324	15.2775
chr4	36244375	36244525	ARAP2	16	-	0.562903	0	6.00357	25.0732	23.6183	14.8412	ARAP2	1.8428	0	10.6654	44.5427	41.958	26.3655	3.27374
chr6	7541529	7541679	DSP	46	+	0.562903	6.02866	6.00357	9.55169	20.9941	16.9614	DSP	11.0568	10.7099	10.6654	16.9686	37.2961	30.132	19.6425
chr4	90127331	90127481	CCSER1	167	+	33.2113	77.619	351.542	319.982	207.316	197.176	CCSER1	210.079	2.33713	10.585	9.63473	6.24233	5.93702	6.32553
chr16	50693539	50693689	NOD2	37	+	7.88064	43.7078	82.0488	79.9954	15.7455	21.2017	NOD2	58.9696	5.54622	10.4114	10.1509	1.998	2.69035	7.48284
chr6	391678	391828	IRF4	158	+	15.7613	60.2866	162.096	120.59	26.2426	38.163	IRF4	62.6552	3.82498	10.2844	7.65102	1.665	2.42131	3.97526
chr3	126357343	126357493	KLF15	416	-	9.56935	26.3754	97.3913	57.3101	112.843	127.21	KLF15	75.5548	2.75624	10.1774	5.98892	11.7921	13.2935	7.8955
chr3	42264684	42264834	CCK	105	-	1.12581	3.76791	11.3401	21.4913	10.497	44.5236	CCK	51.5984	3.34684	10.0728	19.0896	9.32395	39.5481	45.8322
chr6	29723356	29723506	HLA-F	113	+	14.0726	137.152	137.415	89.5471	57.7337	27.5622	HLA-F	77.3976	9.74603	9.76472	6.36322	4.10256	1.95857	5.49988
chr15	100341913	100342063	ADAMTS17	135	-	5.62903	12.0573	54.6992	74.0256	97.0975	97.5278	ADAMTS17	73.712	2.14199	9.71734	13.1507	17.2494	17.3259	13.095
chr2	231926320	231926470	NPPC	173	-	20.8274	56.5187	197.451	93.1289	49.8609	50.8841	NPPC	66.3408	2.71367	9.48035	4.47146	2.39401	2.44313	3.18527
chr19	3868945	3869095	ZFR2	179	-	1.12581	0.753582	10.673	9.55169	31.4911	40.2832	ZFR2	70.0264	0.669369	9.48029	8.48428	27.9719	35.7815	62.2009
chr2	130836838	130836988	ARHGEF4	59	+	0	3.76791	9.33889	28.6551	20.9941	38.163	ARHGEF4	51.5984	3.76791	9.33889	28.6551	20.9941	38.163	51.5984
chr6	166308378	166308528	PRR18	26	-	0	1.50716	9.33889	23.8792	7.87277	25.442	PRR18	0	1.50716	9.33889	23.8792	7.87277	25.442	0
chr1	89065167	89065317	GBP1	39	-	20.2645	691.789	188.779	83.5773	57.7337	21.2017	GBP1	47.9128	34.138	9.31575	4.12432	2.84901	1.04625	2.36437
chr3	184229525	184229675	VWA5B2	22	+	3.94032	9.04299	36.6885	25.0732	20.9941	12.721	VWA5B2	16.5852	2.29499	9.31105	6.36324	5.32802	3.22842	4.2091
chr22	43110675	43110825	BIK	183	+	6.19193	12.8109	56.0333	27.4611	65.6064	67.8454	BIK	38.6988	2.06897	9.04941	4.43498	10.5955	10.9571	6.24988
chr1	236686421	236686571	ACTN2	92	+	13.5097	33.1576	121.406	125.366	97.0975	93.2874	ACTN2	108.725	2.45436	8.98658	9.2797	7.18724	6.90522	8.04792
chr22	50600716	50600866	MAPK8IP2	46	+	1.12581	3.01433	10.006	5.9698	34.1153	38.163	MAPK8IP2	46.07	2.67748	8.88782	5.30267	30.3029	33.8983	40.9216
chr9	38424381	38424531	IGFBPL1	26	-	2.81451	10.5502	24.6813	25.0732	5.24852	16.9614	IGFBPL1	22.1136	3.7485	8.76931	8.90855	1.86481	6.02641	7.857
chr1	186680341	186680491	PTGS2	239	-	42.2177	209.496	369.553	243.568	68.2307	65.7252	PTGS2	178.752	4.96228	8.75351	5.76933	1.61616	1.55682	4.23405
chr7	35254027	35254177	TBX20	27	-	1.68871	6.78224	14.6754	16.7155	0	14.8412	TBX20	14.7424	4.01623	8.6903	9.89838	0	8.78848	8.72998
chr11	117986323	117986473	IL10RA	44	+	3.94032	7.53582	34.0202	34.6249	18.3698	21.2017	IL10RA	57.1268	1.91249	8.63387	8.78733	4.66201	5.38071	14.498
chr1	1013427	1013577	ISG15	171	+	83.8725	962.325	715.759	524.149	265.05	150.532	ISG15	302.219	11.4737	8.53389	6.24935	3.16015	1.79477	3.60331
chr2	86337561	86337711	REEP1	57	-	6.19193	9.79657	52.0309	39.4007	31.4911	38.163	REEP1	22.1136	1.58215	8.40302	6.36323	5.08583	6.16334	3.57136
chr22	18150077	18150227	USP18	70	+	38.2774	473.25	318.189	211.331	86.6005	46.6437	USP18	92.14	12.3637	8.31271	5.52104	2.26244	1.21857	2.40716
chr1	39788773	39788923	BMP8B	35	-	0.562903	0	4.66944	13.1336	7.87277	12.721	BMP8B	12.8996	0	8.29528	23.3319	13.986	22.5989	22.9162
chr14	91417770	91417920	CCDC88C	34	-	0.562903	0.753582	4.66944	9.55169	18.3698	19.0815	CCDC88C	14.7424	1.33874	8.29528	16.9686	32.634	33.8984	26.1899
chr1	24187184	24187334	IFNLR1	23	-	0.562903	3.01433	4.66944	13.1336	10.497	21.2017	IFNLR1	12.8996	5.35497	8.29528	23.3319	18.648	37.6649	22.9162
chr3	146544521	146544671	PLSCR1	269	-	50.0984	644.313	410.911	291.326	149.583	99.648	PLSCR1	222.979	12.8609	8.20208	5.81508	2.98578	1.98905	4.45082
chr7	129144666	129144816	TSPAN33	25	+	4.50322	27.8825	36.6885	38.2067	18.3698	14.8412	TSPAN33	23.9564	6.19168	8.14717	8.48431	4.07926	3.29569	5.31984
chr9	1050275	1050425	DMRT2	23	+	0	3.76791	8.00476	11.9396	13.1213	10.6008	DMRT2	3.6856	3.76791	8.00476	11.9396	13.1213	10.6008	3.6856
chr12	49069859	49070009	RHEBL1	122	-	15.7613	58.0258	122.74	81.1893	55.1094	61.4849	RHEBL1	117.939	3.68154	7.78743	5.15118	3.4965	3.901	7.48282
chr11	33869868	33870018	LMO2	20	-	2.25161	18.8396	17.3436	21.4913	13.1213	12.721	LMO2	33.1704	8.36717	7.70275	9.54486	5.82752	5.64974	14.7319
chr1	52842753	52842903	ZYG11A	55	+	2.25161	1.50716	17.3436	31.043	28.8668	16.9614	ZYG11A	27.642	0.66937	7.70275	13.787	12.8205	7.53301	12.2765
chr17	45431854	45432004	ARHGAP27	34	-	6.19193	35.4184	47.3615	23.8792	36.7396	10.6008	ARHGAP27	31.3276	5.72009	7.64891	3.8565	5.93347	1.71203	5.05942
chr6	149963925	149964075	ULBP1	355	+	6.19193	20.3467	47.3615	19.1034	70.855	120.85	ULBP1	108.725	3.286	7.64891	3.08521	11.4431	19.5173	17.5591
chr3	122680089	122680239	PARP14	61	+	11.821	145.441	90.0536	90.741	18.3698	27.5622	PARP14	88.4544	12.3036	7.6181	7.67625	1.554	2.33163	7.48282
chr19	40284419	40284569	AKT2	32	-	9.56935	51.9972	72.7099	31.043	23.6183	6.36051	AKT2	20.2708	5.43372	7.59821	3.244	2.46812	0.664675	2.1183
chr10	89392558	89392708	IFIT1	584	+	193.076	3059.54	1450.86	671.006	372.645	175.974	IFIT1	541.783	15.8463	7.51445	3.47535	1.93004	0.911423	2.80606
chr15	62165208	62165358	C2CD4B	37	-	1.68871	5.27508	12.6742	10.7456	5.24852	6.36051	C2CD4B	9.214	3.12373	7.50526	6.3632	3.10801	3.76649	5.45624
chr4	84582867	84583017	CDS1	46	+	1.68871	3.01433	12.6742	13.1336	13.1213	21.2017	CDS1	14.7424	1.78499	7.50526	7.7773	7.77001	12.555	8.72998
chr6	111087422	111087572	SLC16A10	46	+	4.50322	8.28941	33.3532	21.4913	20.9941	36.0429	SLC16A10	23.9564	1.84077	7.40652	4.77243	4.66202	8.00381	5.31984
chr4	81471822	81471972	RASGEF1B	215	-	6.75484	29.3897	50.0298	32.2369	26.2426	74.2059	RASGEF1B	36.856	4.35091	7.40651	4.77242	3.88501	10.9856	5.45624
chr1	161524459	161524609	HSPA6	41	+	0	2.26075	7.3377	2.38792	2.62426	14.8412	HSPA6	1.8428	2.26075	7.3377	2.38792	2.62426	14.8412	1.8428
chr22	45972461	45972611	WNT7B	24	-	0	5.27508	7.3377	9.55169	7.87277	12.721	WNT7B	14.7424	5.27508	7.3377	9.55169	7.87277	12.721	14.7424
chr6	144150440	144150590	STX11	415	+	60.7935	177.845	444.931	352.218	146.958	125.09	STX11	175.066	2.92539	7.31873	5.79368	2.41733	2.05762	2.87968
chr11	64996895	64997045	BATF2	59	-	33.7742	227.582	246.146	157.603	62.9822	48.7639	BATF2	73.712	6.73834	7.28799	4.66637	1.8648	1.44382	2.18249
chr16	81779220	81779370	PLCG2	70	+	6.75484	15.8252	48.6956	48.9524	23.6183	40.2832	PLCG2	81.0832	2.34279	7.20899	7.24701	3.4965	5.96361	12.0037
chr4	84499271	84499421	NKX6-1	20	-	0.562903	0.753582	4.00238	2.38792	5.24852	4.24034	NKX6-1	0	1.33874	7.11025	4.24215	9.32402	7.53299	0
chr1	37753129	37753279	EPHA10	24	-	1.12581	0.753582	8.00476	11.9396	13.1213	8.48068	EPHA10	9.214	0.669369	7.11022	10.6053	11.655	7.53296	8.18433
chr9	93184097	93184247	WNK2	25	+	1.12581	0.753582	8.00476	26.2671	13.1213	38.163	WNK2	20.2708	0.669369	7.11022	23.3317	11.655	33.8983	18.0055
chr19	9498523	9498673	ZNF560	47	-	1.12581	3.76791	8.00476	17.9094	5.24852	25.442	ZNF560	16.5852	3.34684	7.11022	15.908	4.66199	22.5988	14.7318
chr2	162318598	162318748	IFIH1	111	-	48.4097	550.115	334.199	151.633	52.4852	36.0429	IFIH1	117.939	11.3637	6.90355	3.13229	1.08419	0.744539	2.43627
chr20	610208	610358	TCF15	79	-	1.68871	0.753582	11.3401	34.6249	70.855	101.768	TCF15	49.7556	0.446247	6.71524	20.5038	41.9581	60.2638	29.4637
chr5	55233548	55233698	CCNO	40	-	0	3.76791	6.67063	10.7456	13.1213	16.9614	CCNO	16.5852	3.76791	6.67063	10.7456	13.1213	16.9614	16.5852
chr14	28766713	28766863	FOXG1	29	+	0	1.50716	6.67063	5.9698	0	14.8412	FOXG1	9.214	1.50716	6.67063	5.9698	0	14.8412	9.214
chr1	27872473	27872623	THEMIS2	142	+	29.8339	195.178	198.118	143.275	57.7337	61.4849	THEMIS2	119.782	6.54216	6.6407	4.80242	1.93517	2.06091	4.01496
chr15	40843979	40844129	SPINT1	70	+	2.81451	3.76791	18.6778	44.1766	18.3698	38.163	SPINT1	18.428	1.33874	6.63625	15.696	6.52682	13.5594	6.5475
chr14	77498721	77498871	ISM2	21	-	3.94032	15.0716	26.0155	16.7155	2.62426	6.36051	ISM2	5.5284	3.82497	6.60238	4.24217	0.666002	1.61421	1.40303
chr10	69451406	69451556	TSPAN15	69	+	3.94032	12.8109	26.0155	42.9826	26.2426	12.721	TSPAN15	44.2272	3.25123	6.60238	10.9084	6.66002	3.22842	11.2243
chr15	45430535	45430685	C15orf48	398	+	7.88064	29.3897	52.0309	185.064	123.34	163.253	C15orf48	200.865	3.72935	6.60237	23.4834	15.651	20.7157	25.4884
chr10	98030536	98030686	CRTAC1	165	-	10.6952	23.3611	70.0417	68.0558	60.3579	82.6866	CRTAC1	88.4544	2.18426	6.54889	6.36321	5.64346	7.73119	8.27048
chr4	154743925	154744075	LRAT	21	+	1.12581	2.26075	7.3377	7.16377	5.24852	21.2017	LRAT	18.428	2.00811	6.51771	6.36321	4.66199	18.8324	16.3687
chr3	142963560	142963710	PAQR9	21	-	1.12581	0.753582	7.3377	7.16377	0	10.6008	PAQR9	3.6856	0.669369	6.51771	6.36321	0	9.41615	3.27373
chr1	78649759	78649909	IFI44	107	+	42.2177	448.381	270.161	212.525	115.467	57.2446	IFI44	114.254	10.6207	6.39924	5.03403	2.73504	1.35594	2.70631
chr15	90717405	90717555	BLM	155	+	12.9468	28.6361	82.0488	144.469	81.352	78.4463	BLM	224.822	2.21183	6.33738	11.1587	6.28356	6.05913	17.3651
chr22	19524336	19524486	CLDN5	25	-	1.68871	1.50716	10.673	15.5215	10.497	19.0815	CLDN5	11.0568	0.892492	6.32021	9.19134	6.21599	11.2995	6.54748
chr1	9997135	9997285	RBP7	56	+	1.68871	1.50716	10.673	35.8188	47.2366	38.163	RBP7	22.1136	0.892492	6.32021	21.2107	27.972	22.5989	13.095
chr7	97732012	97732162	TAC1	117	+	1.68871	6.78224	10.673	8.35773	20.9941	63.6051	TAC1	33.1704	4.01623	6.32021	4.94918	12.432	37.6649	19.6424
chr9	32526120	32526270	DDX58	267	-	141.852	1234.37	884.526	687.721	220.438	152.652	DDX58	379.617	8.70182	6.23556	4.84816	1.554	1.07614	2.67615
chr7	93117903	93118053	SAMD9	55	-	24.7677	285.608	152.758	102.681	55.1094	21.2017	SAMD9	62.6552	11.5315	6.16763	4.14576	2.22505	0.856022	2.52971
chr2	172427530	172427680	ITGA6	218	+	18.5758	41.447	113.401	121.784	86.6005	95.4076	ITGA6	140.053	2.23124	6.10477	6.55606	4.66201	5.13612	7.53954
chr5	1008727	1008877	NKD2	156	+	4.50322	6.02866	27.3496	34.6249	44.6124	42.4034	NKD2	38.6988	1.33874	6.07334	7.68892	9.90678	9.41624	8.59358
chr1	50423354	50423504	DMRTA2	21	-	0	2.26075	6.00357	3.58188	13.1213	4.24034	DMRTA2	9.214	2.26075	6.00357	3.58188	13.1213	4.24034	9.214
chr2	88452647	88452797	FOXI3	38	-	0	0	6.00357	2.38792	5.24852	10.6008	FOXI3	3.6856	0	6.00357	2.38792	5.24852	10.6008	3.6856
chr10	123135672	123135822	HMX3	33	+	0	0.753582	6.00357	1.19396	7.87277	19.0815	HMX3	1.8428	0.753582	6.00357	1.19396	7.87277	19.0815	1.8428
chr10	23192247	23192397	PTF1A	21	+	0	0	6.00357	4.77584	5.24852	8.48068	PTF1A	0	0	6.00357	4.77584	5.24852	8.48068	0
chr2	162318759	162318909	GCA	89	+	35.4629	312.737	212.126	139.693	62.9822	38.163	GCA	82.926	8.81871	5.98163	3.93913	1.776	1.07614	2.33839
chr6	16238534	16238684	GMPR	57	+	36.5887	242.653	217.463	148.051	62.9822	46.6437	GMPR	132.682	6.63191	5.94345	4.04636	1.72136	1.27481	3.62631
chr19	7595817	7595967	CAMSAP3	22	+	0.562903	3.01433	3.33532	7.16377	10.497	14.8412	CAMSAP3	9.214	5.35497	5.92521	12.7265	18.648	26.3655	16.3687
chr3	32817265	32817415	TRIM71	26	+	0.562903	2.26075	3.33532	9.55169	7.87277	23.3219	TRIM71	12.8996	4.01623	5.92521	16.9686	13.986	41.4315	22.9162
chr16	56667985	56668135	MT1G	28	-	1.12581	3.01433	6.67063	16.7155	15.7455	29.6824	MT1G	14.7424	2.67748	5.92518	14.8475	13.9859	26.3654	13.0949
chr2	174334888	174335038	SP9	69	+	1.12581	0.753582	6.67063	8.35773	15.7455	16.9614	SP9	22.1136	0.669369	5.92518	7.42375	13.9859	15.066	19.6424
chr19	18173721	18173871	IFI30	31	+	15.1984	55.0115	86.7182	47.7584	39.3639	27.5622	IFI30	53.4412	3.61956	5.70575	3.14233	2.59	1.81349	3.51624
chr2	100562739	100562889	PDCL3	31	+	2.81451	15.0716	16.0095	15.5215	13.1213	6.36051	PDCL3	22.1136	5.35496	5.6882	5.51481	4.66202	2.2599	7.857
chr1	42380737	42380887	RIMKLA	30	+	5.62903	3.01433	32.019	48.9524	34.1153	29.6824	RIMKLA	38.6988	0.535497	5.68819	8.69642	6.0606	5.27309	6.87486
chr10	15088699	15088849	ACBD7	30	-	5.62903	9.79657	31.352	13.1336	15.7455	16.9614	ACBD7	16.5852	1.74037	5.5697	2.33319	2.7972	3.0132	2.94637
chr2	121285125	121285275	TFCP2L1	130	-	1.68871	0	9.33889	14.3275	31.4911	40.2832	TFCP2L1	18.428	0	5.53019	8.48429	18.648	23.8544	10.9125
chr21	41426174	41426324	MX1	110	+	49.5355	535.043	273.496	230.434	136.461	89.0471	MX1	184.28	10.8012	5.52121	4.6519	2.75481	1.79764	3.72016
chr19	33621879	33622029	CHST8	1502	+	424.429	1269.03	2320.71	1547.37	879.126	725.098	CHST8	1251.26	2.98997	5.46784	3.64577	2.07131	1.70841	2.9481
chr7	22727115	22727265	IL6	167	+	173.937	484.553	948.564	632.799	104.97	93.2874	IL6	143.738	2.7858	5.45349	3.63809	0.603494	0.536329	0.82638
chr15	73368783	73368933	HCN4	50	-	0	1.50716	5.33651	2.38792	18.3698	29.6824	HCN4	7.3712	1.50716	5.33651	2.38792	18.3698	29.6824	7.3712
chr6	125749561	125749711	HEY2	29	+	2.25161	4.52149	12.0071	5.9698	7.87277	2.12017	HEY2	14.7424	2.00811	5.33267	2.65135	3.49651	0.941624	6.54749
chr12	116881361	116881511	HRK	85	-	2.25161	6.78224	12.0071	14.3275	26.2426	38.163	HRK	29.4848	3.01217	5.33267	6.36322	11.655	16.9492	13.095
chr11	2270931	2271081	ASCL2	28	-	1.12581	3.01433	6.00357	13.1336	5.24852	27.5622	ASCL2	1.8428	2.67748	5.33267	11.6659	4.66199	24.4821	1.63687
chr18	50195066	50195216	MYO5B	50	-	1.12581	2.26075	6.00357	13.1336	28.8668	44.5236	MYO5B	18.428	2.00811	5.33267	11.6659	25.6409	39.5481	16.3687
chr5	73120547	73120697	TMEM171	34	+	12.3839	27.8825	64.7052	78.8014	44.6124	16.9614	TMEM171	55.284	2.25151	5.22495	6.36321	3.60245	1.36963	4.46418
chr14	100375663	100375813	WDR25	275	+	60.7935	308.969	317.522	179.094	115.467	99.648	WDR25	184.28	5.08227	5.22296	2.94594	1.89933	1.63912	3.03125
chr7	73830922	73831072	CLDN4	24	+	2.81451	6.02866	14.6754	22.6853	10.497	10.6008	CLDN4	16.5852	2.14199	5.21419	8.06012	3.7296	3.76648	5.89275
chr1	39901929	39902079	MYCL	43	-	2.81451	14.3181	14.6754	19.1034	23.6183	16.9614	MYCL	14.7424	5.08724	5.21419	6.78747	8.39162	6.02641	5.238
chr19	43639723	43639873	CADM4	68	-	5.62903	6.02866	29.3508	69.2497	49.8609	40.2832	CADM4	47.9128	1.07099	5.21418	12.3022	8.85781	7.15633	8.51173
chr20	38926342	38926492	FAM83D	360	+	97.9451	194.424	508.969	291.326	91.849	103.888	FAM83D	361.189	1.98503	5.19647	2.97438	0.93776	1.06068	3.68767
chr7	139109646	139109796	ZC3HAV1	280	-	113.143	363.98	583.68	557.58	362.148	207.777	ZC3HAV1	307.748	3.21699	5.15878	4.9281	3.2008	1.83641	2.71999
chr10	114043791	114043941	ADRB1	55	+	3.94032	11.3037	20.0119	21.4913	18.3698	48.7639	ADRB1	23.9564	2.86873	5.07875	5.4542	4.66201	12.3756	6.07981
chr15	40874154	40874304	RHOV	51	-	15.1984	42.2006	76.0452	44.1766	20.9941	16.9614	RHOV	31.3276	2.77665	5.0035	2.90666	1.38134	1.116	2.06124
chr14	54902742	54902892	GCH1	331	-	90.6274	305.201	451.602	256.702	230.935	212.017	GCH1	210.079	3.36765	4.98306	2.8325	2.54818	2.33944	2.31805
chr15	32030440	32030590	CHRNA7	27	+	7.88064	14.3181	38.6897	39.4007	20.9941	27.5622	CHRNA7	40.5416	1.81687	4.90946	4.99968	2.66401	3.49746	5.14446
chr3	186109010	186109160	ETV5	327	-	70.9258	201.206	344.205	271.029	120.716	133.571	ETV5	259.835	2.83685	4.85303	3.8213	1.702	1.88325	3.66348
chr1	27672114	27672264	IFI6	348	-	142.977	1384.33	687.075	481.166	223.062	144.172	IFI6	335.39	9.68219	4.80549	3.36534	1.56013	1.00836	2.34576
chr9	135087595	135087745	OLFM1	86	+	12.3839	39.1863	59.3686	44.1766	39.3639	61.4849	OLFM1	40.5416	3.16429	4.79401	3.56726	3.17864	4.96491	3.27373
chr9	83063070	83063220	RASEF	191	-	34.9	93.4442	165.432	109.844	76.1035	72.0858	RASEF	88.4544	2.67748	4.74017	3.14739	2.18062	2.0655	2.53451
chr2	27262978	27263128	SLC30A3	64	-	6.75484	10.5502	32.019	27.4611	13.1213	27.5622	SLC30A3	47.9128	1.56187	4.74016	4.0654	1.9425	4.08036	7.09311
chr2	26173046	26173196	GAREM2	23	+	2.25161	3.01433	10.673	35.8188	15.7455	16.9614	GAREM2	23.9564	1.33874	4.74016	15.9081	6.993	7.53301	10.6397
chr6	39229407	39229557	KCNK5	29	-	1.68871	4.52149	8.00476	16.7155	15.7455	19.0815	KCNK5	25.7992	2.67748	4.74016	9.89838	9.32398	11.2995	15.2775
chr11	93330657	93330807	DEUP1	26	+	0.562903	0	2.66825	1.19396	0	14.8412	DEUP1	12.8996	0	4.74016	2.12108	0	26.3655	22.9162
chr19	50203580	50203730	MYH14	31	+	0.562903	1.50716	2.66825	14.3275	20.9941	10.6008	MYH14	11.0568	2.67748	4.74016	25.4529	37.2961	18.8324	19.6425
chr11	57460628	57460778	RTN4RL2	40	+	1.12581	7.53582	5.33651	28.6551	15.7455	12.721	RTN4RL2	22.1136	6.69369	4.74015	25.4529	13.9859	11.2994	19.6424
chr7	100896568	100896718	ACHE	58	-	0	0.753582	4.66944	4.77584	7.87277	14.8412	ACHE	1.8428	0.753582	4.66944	4.77584	7.87277	14.8412	1.8428
chr4	37453871	37454021	C4orf19	23	+	0	1.50716	4.66944	4.77584	5.24852	12.721	C4orf19	7.3712	1.50716	4.66944	4.77584	5.24852	12.721	7.3712
chr1	63322484	63322634	FOXD3	32	+	0	1.50716	4.66944	2.38792	2.62426	16.9614	FOXD3	9.214	1.50716	4.66944	2.38792	2.62426	16.9614	9.214
chr17	2755588	2755738	RAP1GAP2	23	+	0	0	4.66944	4.77584	20.9941	21.2017	RAP1GAP2	20.2708	0	4.66944	4.77584	20.9941	21.2017	20.2708
chr2	98731022	98731172	MGAT4A	53	-	12.3839	27.129	57.3675	75.2195	52.4852	46.6437	MGAT4A	75.5548	2.19067	4.63243	6.07398	4.23818	3.76648	6.10105
chr12	130162407	130162557	FZD10	35	+	11.821	33.1576	54.6992	32.2369	13.1213	8.48068	FZD10	33.1704	2.80497	4.62729	2.72709	1.11	0.717425	2.80606
chr11	13277756	13277906	ARNTL	143	+	31.5226	63.3009	145.42	130.142	112.843	82.6866	ARNTL	108.725	2.00811	4.6132	4.12853	3.57975	2.62309	3.44911
chr17	40015356	40015506	CSF3	80	+	3.94032	6.02866	18.0107	107.456	31.4911	50.8841	CSF3	79.2404	1.52999	4.57087	27.2709	7.99202	12.9137	20.1101
chr18	59899924	59900074	PMAIP1	1159	+	374.33	1009.05	1710.35	1081.73	537.973	415.553	PMAIP1	1122.27	2.69562	4.5691	2.88978	1.43716	1.11012	2.99808
chr9	97039064	97039214	CTSV	47	-	7.31774	19.5931	33.3532	39.4007	31.4911	23.3219	CTSV	35.0132	2.67748	4.55786	5.38427	4.30339	3.18704	4.7847
chr9	137070465	137070615	SAPCD2	159	-	17.45	27.129	79.3805	81.1893	73.4792	65.7252	SAPCD2	112.411	1.55467	4.54903	4.65268	4.21084	3.76649	6.44189
chr14	67619852	67620002	ARG2	67	+	6.75484	16.5788	30.6849	26.2671	44.6124	63.6051	ARG2	22.1136	2.45436	4.54265	3.88863	6.60451	9.41623	3.27374
chr15	78565468	78565618	CHRNA5	110	+	18.0129	48.2293	81.3817	77.6075	39.3639	46.6437	CHRNA5	62.6552	2.67749	4.51797	4.30844	2.18532	2.58946	3.47835
chr3	40506001	40506151	ZNF620	24	+	2.81451	13.5645	12.6742	20.2973	7.87277	10.6008	ZNF620	12.8996	4.81949	4.50316	7.21166	2.79721	3.76648	4.58325
chr8	80485545	80485695	ZBTB10	184	+	21.3903	57.2723	96.0571	93.1289	73.4792	61.4849	ZBTB10	81.0832	2.67749	4.49069	4.35379	3.43516	2.87443	3.79065
chrX	85243963	85244113	ZNF711	58	+	4.50322	10.5502	20.0119	19.1034	28.8668	21.2017	ZNF711	25.7992	2.34281	4.44391	4.24216	6.41026	4.70812	5.72906
chr22	35648391	35648541	APOL6	97	+	40.529	357.198	179.44	102.681	68.2307	38.163	APOL6	81.0832	8.81339	4.42745	2.53352	1.6835	0.941622	2.00062
chrX	119693086	119693236	SEPT6	50	-	20.8274	30.8969	92.0548	54.9222	26.2426	40.2832	SEPT6	40.5416	1.48347	4.41989	2.63702	1.26	1.93414	1.94655
chr6	31357102	31357252	HLA-B	291	-	152.547	630.748	673.067	310.43	144.334	106.008	HLA-B	372.246	4.13478	4.41219	2.03498	0.946161	0.69492	2.44021
chr16	50548318	50548468	NKD1	187	+	66.9855	197.439	294.842	205.361	139.086	125.09	NKD1	197.18	2.94749	4.40158	3.06575	2.07636	1.86742	2.94362
chr3	193241168	193241318	PLAAT1	33	+	3.94032	6.02866	17.3436	16.7155	15.7455	23.3219	PLAAT1	18.428	1.52999	4.40157	4.24217	3.996	5.91878	4.67678
chr22	50545760	50545910	KLHDC7B	22	+	1.68871	14.3181	7.3377	0	2.62426	6.36051	KLHDC7B	0	8.47872	4.34515	0	1.554	3.76649	0
chr5	14581751	14581901	OTULINL	72	+	7.88064	22.6075	34.0202	42.9826	47.2366	29.6824	OTULINL	47.9128	2.86874	4.31693	5.4542	5.99401	3.7665	6.07981
chr7	131556532	131556682	PODXL	35	-	7.31774	13.5645	31.352	19.1034	34.1153	23.3219	PODXL	31.3276	1.85365	4.28438	2.61056	4.662	3.18704	4.28105
chr5	693260	693410	TPPP	27	-	3.94032	6.02866	16.6766	20.2973	20.9941	21.2017	TPPP	20.2708	1.52999	4.2323	5.15118	5.32802	5.38071	5.14446
chr16	47143872	47144022	NETO2	642	-	100.197	189.149	423.585	325.951	262.426	286.223	NETO2	512.298	1.88777	4.22752	3.2531	2.6191	2.8566	5.11291
chr22	29480146	29480296	NEFH	112	+	6.75484	8.28941	28.0167	42.9826	31.4911	63.6051	NEFH	27.642	1.22718	4.14765	6.36323	4.66201	9.41623	4.09218
chr12	117099322	117099472	TESC	36	-	2.25161	6.78224	9.33889	23.8792	34.1153	21.2017	TESC	27.642	3.01217	4.14765	10.6054	15.1515	9.41624	12.2765
chr17	3964369	3964519	ATP2A3	21	-	3.37742	1.50716	14.0083	21.4913	23.6183	29.6824	ATP2A3	22.1136	0.446246	4.14763	6.36323	6.993	8.78848	6.54748
chr17	75588375	75588525	MYO15B	28	+	1.12581	4.52149	4.66944	15.5215	15.7455	6.36051	MYO15B	3.6856	4.01621	4.14763	13.787	13.9859	5.64972	3.27373
chr6	79631248	79631398	SH3BGRL2	84	+	15.7613	20.3467	64.7052	52.5343	49.8609	25.442	SH3BGRL2	55.284	1.29093	4.10532	3.33312	3.1635	1.61421	3.50758
chr3	50205201	50205351	SLC38A3	44	+	6.19193	12.0573	25.3484	29.849	18.3698	16.9614	SLC38A3	44.2272	1.94726	4.09378	4.82063	2.96673	2.73928	7.14272
chr4	168480414	168480564	DDX60L	514	-	285.955	1744.54	1170.03	543.252	212.565	122.97	DDX60L	316.962	6.10075	4.09166	1.89978	0.743351	0.430033	1.10843
chr6	2841799	2841949	SERPINB1	68	-	13.5097	24.1146	54.6992	76.4135	47.2366	38.163	SERPINB1	57.1268	1.78498	4.04888	5.6562	3.4965	2.82486	4.22858
chr11	615875	616025	IRF7	318	-	157.613	952.528	636.379	349.831	167.952	118.729	IRF7	263.52	6.04346	4.0376	2.21956	1.0656	0.753294	1.67194
chr19	50328988	50329138	KCNC3	150	-	20.8274	31.6505	83.3829	82.3833	65.6064	67.8454	KCNC3	105.04	1.51966	4.00352	3.95552	3.15	3.25751	5.04336
chr8	85245442	85245592	CA13	48	+	7.88064	40.6934	31.352	33.4309	18.3698	10.6008	CA13	31.3276	5.16372	3.97836	4.24216	2.331	1.34517	3.97526
chr15	40953399	40953549	CHAC1	1400	+	57.4161	114.545	223.466	103.875	540.597	604.248	CHAC1	617.338	1.995	3.89204	1.80916	9.41543	10.524	10.752
chr18	57435323	57435473	ONECUT2	116	+	10.1323	29.3897	39.3567	31.043	31.4911	55.1244	ONECUT2	70.0264	2.9006	3.88428	3.06377	3.10799	5.44046	6.9112
chrX	100410198	100410348	PCDH19	85	-	18.5758	61.7937	72.0429	27.4611	28.8668	23.3219	PCDH19	58.9696	3.32657	3.87832	1.47833	1.554	1.2555	3.17454
chr22	39077258	39077408	APOBEC3G	249	+	137.348	605.127	530.982	216.107	78.7277	44.5236	APOBEC3G	121.625	4.40579	3.86596	1.57343	0.573199	0.324166	0.885524
chr22	50529939	50530089	TYMP	240	-	65.2967	190.656	251.483	156.409	115.467	93.2874	TYMP	173.223	2.91984	3.85139	2.39536	1.76834	1.42867	2.65286
chr2	63050756	63050906	OTX1	38	+	2.25161	6.78224	8.67182	15.5215	15.7455	14.8412	OTX1	23.9564	3.01217	3.85139	6.89351	6.993	6.59137	10.6397
chr5	59039303	59039453	PDE4D	80	-	7.31774	10.5502	28.0167	118.202	81.352	72.0858	PDE4D	103.197	1.44173	3.8286	16.1528	11.1171	9.85083	14.1023
chr6	31114735	31114885	PSORS1C1	27	+	5.06613	29.3897	19.3448	20.2973	7.87277	4.24034	PSORS1C1	9.214	5.80121	3.81846	4.00647	1.554	0.836998	1.81875
chr1	11654348	11654498	FBXO2	27	-	11.2581	20.3467	42.6921	51.3403	31.4911	16.9614	FBXO2	35.0132	1.80729	3.79212	4.5603	2.79719	1.5066	3.11005
chr5	115169825	115169975	TRIM36	53	-	12.9468	29.3897	48.6956	45.3705	49.8609	48.7639	TRIM36	31.3276	2.27004	3.76121	3.50438	3.85121	3.76648	2.41972
chr7	97872334	97872484	ASNS	861	-	77.6806	130.37	291.507	124.172	341.153	277.742	ASNS	536.255	1.67828	3.75264	1.59849	4.39174	3.57544	6.90333
chr19	6530952	6531102	TNFSF9	771	+	68.1113	154.484	254.151	201.779	152.207	175.974	TNFSF9	269.049	2.26811	3.73141	2.96249	2.23468	2.58362	3.95014
chr6	119078586	119078736	FAM184A	40	-	5.06613	5.27508	18.6778	39.4007	39.3639	25.442	FAM184A	44.2272	1.04124	3.6868	7.77728	7.77001	5.02198	8.72998
chr4	88284483	88284633	PPM1K	249	-	64.7338	382.066	238.142	128.948	94.4733	80.5664	PPM1K	158.481	5.90211	3.67879	1.99197	1.45941	1.24458	2.4482
chr1	84997030	84997180	MCOLN2	23	-	6.19193	18.8396	22.6802	11.9396	13.1213	4.24034	MCOLN2	22.1136	3.04261	3.66286	1.92825	2.1191	0.684817	3.57136
chr16	56608518	56608668	MT2A	451	+	167.745	682.746	609.696	702.049	354.275	332.867	MT2A	490.185	4.07014	3.63466	4.18522	2.11199	1.98436	2.9222
chr18	79395872	79396022	NFATC1	69	+	21.9532	48.9828	79.3805	83.5773	52.4852	29.6824	NFATC1	64.498	2.23124	3.6159	3.80707	2.39078	1.35208	2.93798
chrX	111096106	111096256	PAK3	21	+	18.5758	33.9112	66.0393	54.9222	34.1153	14.8412	PAK3	18.428	1.82556	3.55513	2.95665	1.83655	0.798953	0.992043
chr15	83284592	83284742	BNC1	30	-	2.25161	1.50716	8.00476	19.1034	23.6183	19.0815	BNC1	22.1136	0.66937	3.55513	8.48433	10.4895	8.4746	9.82124
chr4	78551718	78551868	ANXA3	20	+	0.562903	0	2.00119	5.9698	2.62426	19.0815	ANXA3	9.214	0	3.55512	10.6054	4.66201	33.8984	16.3687
chr22	43343276	43343426	SCUBE1	24	-	0.562903	0	2.00119	25.0732	13.1213	16.9614	SCUBE1	44.2272	0	3.55512	44.5427	23.3101	30.132	78.5698
chr2	176122643	176122793	HOXD9	49	+	1.12581	3.76791	4.00238	38.2067	13.1213	31.8025	HOXD9	42.3844	3.34684	3.55511	33.9371	11.655	28.2485	37.6479
chr11	77474246	77474396	PAK1	38	-	1.12581	7.53582	4.00238	8.35773	15.7455	14.8412	PAK1	20.2708	6.69369	3.55511	7.42375	13.9859	13.1827	18.0055
chr19	13795370	13795520	ZSWIM4	231	+	55.7274	137.906	196.117	154.021	65.6064	82.6866	ZSWIM4	158.481	2.47465	3.51922	2.76383	1.17727	1.48377	2.84386
chr1	1020044	1020194	AGRN	84	+	38.2774	163.527	134.08	99.0988	70.855	78.4463	AGRN	110.568	4.27216	3.50285	2.58896	1.85109	2.04942	2.8886
chr7	95772522	95772672	DYNC1I1	46	+	7.31774	21.1003	25.3484	23.8792	13.1213	16.9614	DYNC1I1	23.9564	2.88344	3.46397	3.26319	1.79308	2.31785	3.27374
chr6	3227560	3227710	TUBB2B	107	-	21.3903	29.3897	74.044	88.3531	44.6124	63.6051	TUBB2B	79.2404	1.37397	3.46157	4.13052	2.08564	2.97355	3.7045
chr1	39955074	39955224	MFSD2A	205	+	38.8403	112.284	133.413	145.663	128.589	72.0858	MFSD2A	130.839	2.89091	3.43491	3.75031	3.31071	1.85595	3.36864
chr15	45378445	45378595	GATM	23	-	5.06613	11.3037	17.3436	19.1034	36.7396	19.0815	GATM	25.7992	2.23123	3.42344	3.77081	7.252	3.76648	5.09249
chr11	61508675	61508825	LRRC10B	99	+	5.06613	7.53582	17.3436	41.7886	39.3639	40.2832	LRRC10B	46.07	1.48749	3.42344	8.24862	7.77001	7.95147	9.09373
chr2	218287322	218287472	PNKD	121	+	34.3371	74.6046	117.403	118.202	49.8609	53.0042	PNKD	82.926	2.17271	3.41913	3.4424	1.4521	1.54364	2.41506
chr1	214281144	214281294	SMYD2	73	+	23.079	41.447	78.7135	103.875	70.855	55.1244	SMYD2	60.8124	1.79588	3.41061	4.50084	3.07011	2.38851	2.63497
chr9	78297066	78297216	PSAT1	631	+	43.3435	80.6333	146.754	88.3531	212.565	254.42	PSAT1	385.145	1.86033	3.38584	2.03844	4.9042	5.86985	8.88588
chr7	128937916	128938066	IRF5	27	+	3.94032	7.53582	13.3413	21.4913	2.62426	14.8412	IRF5	9.214	1.91249	3.38584	5.4542	0.666002	3.7665	2.33839
chr1	212699693	212699843	BATF3	37	-	11.2581	40.6934	38.0226	32.2369	28.8668	23.3219	BATF3	14.7424	3.61459	3.37735	2.86344	2.56409	2.07157	1.30949
chr1	196608769	196608919	KCNT2	38	-	11.2581	26.3754	38.0226	54.9222	23.6183	14.8412	KCNT2	40.5416	2.34279	3.37735	4.87846	2.09789	1.31827	3.6011
chr17	49495221	49495371	NGFR	108	+	42.2177	64.0545	142.085	125.366	57.7337	40.2832	NGFR	108.725	1.51724	3.36553	2.96951	1.36752	0.954178	2.57534
chr1	111204464	111204614	DENND2D	72	-	6.75484	7.53582	22.6802	46.5645	18.3698	31.8025	DENND2D	38.6988	1.11562	3.35762	6.8935	2.7195	4.70811	5.72905
chr19	11384238	11384388	EPOR	29	-	3.37742	3.01433	11.3401	33.4309	18.3698	14.8412	EPOR	23.9564	0.892495	3.35762	9.89835	5.439	4.39424	7.09311
chr7	157010591	157010741	MNX1	35	-	0	1.50716	3.33532	11.9396	15.7455	25.442	MNX1	5.5284	1.50716	3.33532	11.9396	15.7455	25.442	5.5284
chr22	39040852	39041002	APOBEC3F	236	+	166.056	657.877	550.994	218.495	94.4733	53.0042	APOBEC3F	138.21	3.96178	3.31812	1.31579	0.568924	0.319195	0.83231
chr6	34236830	34236980	HMGA1	127	+	28.1451	51.9972	93.3889	181.482	89.2248	86.9269	HMGA1	132.682	1.84747	3.31812	6.44809	3.17017	3.08853	4.71421
chr11	124739877	124740027	NRGN	25	+	8.44354	18.8396	28.0167	29.849	5.24852	10.6008	NRGN	23.9564	2.23124	3.31812	3.53513	0.621602	1.25549	2.83725
chr1	37793823	37793973	MANEAL	15	+	2.81451	5.27508	9.33889	8.35773	15.7455	10.6008	MANEAL	16.5852	1.87424	3.31812	2.96952	5.5944	3.76648	5.89275
chr8	143430646	143430796	MAFA	37	-	11.2581	22.6075	37.3556	66.8618	44.6124	69.9656	MAFA	47.9128	2.00811	3.31811	5.939	3.96269	6.21469	4.25585
chr21	42219073	42219223	ABCG1	137	+	18.5758	26.3754	61.3698	105.069	78.7277	72.0858	ABCG1	193.494	1.41988	3.30375	5.65623	4.23819	3.88063	10.4165
chr11	68684468	68684618	GAL	55	+	10.1323	13.5645	33.3532	77.6075	39.3639	46.6437	GAL	119.782	1.33874	3.29177	7.65942	3.88499	4.60347	11.8218
chr21	44240886	44241036	ICOSLG	219	-	25.8935	39.1863	84.7171	96.7108	104.97	91.1673	ICOSLG	132.682	1.51336	3.27175	3.73495	4.05391	3.52086	5.12414
chr16	28292457	28292607	SBK1	22	+	2.25161	4.52149	7.3377	20.2973	15.7455	16.9614	SBK1	27.642	2.00811	3.25887	9.01457	6.993	7.53301	12.2765
chr19	8364071	8364221	ANGPTL4	178	+	77.6806	146.195	251.483	230.434	104.97	65.7252	ANGPTL4	125.31	1.882	3.2374	2.96643	1.3513	0.846095	1.61314
chr16	68448426	68448576	SMPD3	34	-	18.5758	32.404	60.0357	28.6551	28.8668	46.6437	SMPD3	46.07	1.74442	3.23193	1.5426	1.554	2.51099	2.48011
chr9	132161620	132161770	NTNG2	25	+	6.19193	24.1146	20.0119	16.7155	2.62426	4.24034	NTNG2	22.1136	3.89452	3.23193	2.69956	0.423819	0.684817	3.57136
chr18	7117723	7117873	LAMA1	175	-	61.9193	98.7193	199.452	192.228	118.092	93.2874	LAMA1	123.468	1.59432	3.22116	3.10449	1.90719	1.5066	1.99401
chrX	103310877	103311027	BEX2	184	-	3.94032	4.52149	12.6742	32.2369	47.2366	57.2446	BEX2	47.9128	1.14749	3.21654	8.18129	11.988	14.5279	12.1596
chr7	8262057	8262207	ICA1	37	-	3.94032	6.02866	12.6742	21.4913	15.7455	12.721	ICA1	27.642	1.52999	3.21654	5.4542	3.996	3.22842	7.01517
chr17	6755979	6756129	XAF1	76	+	38.2774	315.751	122.74	82.3833	65.6064	44.5236	XAF1	82.926	8.24902	3.20659	2.15227	1.71397	1.16318	2.16645
chr5	69492711	69492861	OCLN	72	+	1.68871	1.50716	5.33651	27.4611	26.2426	36.0429	OCLN	5.5284	0.892492	3.16011	16.2616	15.54	21.3435	3.27374
chr12	119989167	119989317	BICDL1	98	+	3.37742	10.5502	10.673	15.5215	18.3698	36.0429	BICDL1	12.8996	3.12375	3.1601	4.59567	5.439	10.6717	3.81937
chr10	119029642	119029792	NANOS1	144	+	77.6806	93.4442	244.812	263.865	131.213	171.734	NANOS1	224.822	1.20293	3.15152	3.39679	1.68913	2.21077	2.89418
chr15	82952614	82952764	HOMER2	135	-	18.0129	21.1003	56.7004	75.2195	78.7277	82.6866	HOMER2	64.498	1.1714	3.14777	4.17587	4.37063	4.59041	3.58066
chr20	36951619	36951769	SAMHD1	166	-	74.3032	414.47	232.805	213.719	146.958	74.2059	SAMHD1	184.28	5.57809	3.13318	2.87631	1.97782	0.998691	2.48011
chr7	98617211	98617361	NPTX2	447	+	109.766	219.292	343.538	198.198	115.467	178.094	NPTX2	291.162	1.99781	3.12973	1.80564	1.05194	1.62249	2.65257
chr4	3765838	3765988	ADRA2C	52	+	14.0726	28.6361	44.0262	66.8618	34.1153	40.2832	ADRA2C	31.3276	2.03488	3.12851	4.7512	2.42424	2.86253	2.22614
chr4	140427552	140427702	CLGN	47	-	4.50322	6.02866	14.0083	17.9094	7.87277	21.2017	CLGN	36.856	1.33874	3.11073	3.97702	1.74825	4.70812	8.18437
chrX	152637831	152637981	GABRQ	53	+	4.50322	3.01433	14.0083	56.1162	34.1153	42.4034	GABRQ	42.3844	0.669372	3.11073	12.4613	7.57576	9.41624	9.41202
chr10	110497830	110497980	DUSP5	977	+	287.081	735.496	889.196	715.183	330.656	320.146	DUSP5	751.862	2.56198	3.09737	2.49122	1.15179	1.11518	2.61899
chr13	48976582	48976732	FNDC3A	63	+	34.9	31.6505	108.064	138.499	68.2307	50.8841	FNDC3A	101.354	0.906891	3.09639	3.96845	1.95503	1.458	2.90413
chr17	34255213	34255363	CCL2	129	+	146.918	785.986	452.936	230.434	131.213	97.5278	CCL2	140.053	5.34983	3.08292	1.56845	0.893104	0.663825	0.953273
chr14	70641879	70642029	TTC9	26	+	2.81451	4.52149	8.67182	10.7456	13.1213	14.8412	TTC9	14.7424	1.60649	3.08111	3.81793	4.66202	5.2731	5.238
chr6	170290678	170290828	DLL1	113	-	34.9	104.748	107.397	79.9954	65.6064	40.2832	DLL1	110.568	3.00138	3.07728	2.29213	1.87984	1.15425	3.16814
chr8	40897748	40897898	ZMAT4	33	-	12.3839	36.9255	38.0226	26.2671	18.3698	2.12017	ZMAT4	14.7424	2.98173	3.07033	2.12107	1.48336	0.171204	1.19045
chr2	6865607	6865757	CMPK2	67	-	34.9	141.673	106.73	118.202	70.855	42.4034	CMPK2	119.782	4.0594	3.05817	3.38688	2.03023	1.215	3.43215
chr22	26429208	26429358	ASPHD2	63	+	26.4564	57.2723	80.7147	96.7108	57.7337	55.1244	ASPHD2	77.3976	2.16478	3.05086	3.65548	2.18222	2.08359	2.92548
chr10	68827453	68827603	STOX1	68	+	25.8935	56.5187	78.7135	89.5471	52.4852	27.5622	STOX1	58.9696	2.18274	3.03989	3.45828	2.02696	1.06444	2.27739
chr6	31272016	31272166	HLA-C	455	-	171.685	675.21	520.309	366.546	254.553	184.455	HLA-C	324.333	3.93284	3.0306	2.13499	1.48267	1.07438	1.88912
chr11	65900315	65900465	FOSL1	385	-	168.308	422.006	509.636	391.619	209.941	133.571	FOSL1	261.678	2.50734	3.028	2.3268	1.24736	0.793611	1.55476
chr4	17577422	17577572	LAP3	468	+	268.505	1063.3	806.48	447.735	278.171	144.172	LAP3	355.66	3.96008	3.00359	1.66751	1.036	0.536943	1.32459
chr2	230219872	230220022	SP110	57	-	36.5887	227.582	109.398	79.9954	57.7337	25.442	SP110	46.07	6.22001	2.98994	2.18634	1.57791	0.695351	1.25913
chr5	132747392	132747542	CCNI2	31	+	2.25161	2.26075	6.67063	5.9698	13.1213	8.48068	CCNI2	7.3712	1.00406	2.9626	2.65135	5.82752	3.7665	3.27375
chr16	56657894	56658044	MT1F	36	+	1.12581	0	3.33532	5.9698	7.87277	6.36051	MT1F	5.5284	0	2.9626	5.30267	6.99298	5.64972	4.9106
chr1	6424703	6424853	ESPN	129	+	24.2048	34.6648	71.3758	75.2195	97.0975	99.648	ESPN	68.1836	1.43215	2.94883	3.10763	4.0115	4.11687	2.81695
chr6	29942457	29942607	HLA-A	1344	+	245.426	740.771	723.097	429.826	275.547	239.579	HLA-A	604.438	3.01831	2.94629	1.75135	1.12273	0.976176	2.46281
chr17	38674857	38675007	EPOP	275	-	58.5419	119.82	172.102	167.155	110.219	103.888	EPOP	171.38	2.04674	2.93981	2.85531	1.88274	1.77459	2.92748
chrX	101931956	101932106	ZMAT1	351	-	93.4419	155.992	274.163	294.908	241.432	150.532	ZMAT1	280.106	1.6694	2.93405	3.15606	2.58377	1.61097	2.99765
chr4	78057528	78057678	FRAS1	127	+	28.7081	42.9542	84.05	51.3403	20.9941	21.2017	FRAS1	62.6552	1.49624	2.92775	1.78836	0.731295	0.738527	2.18249
chr8	109334005	109334155	NUDCD1	125	-	65.2967	230.596	190.78	136.112	70.855	57.2446	NUDCD1	141.896	3.53151	2.92174	2.08452	1.08512	0.876684	2.1731
chr4	74445055	74445205	AREG	75	+	13.5097	45.9685	39.3567	105.069	41.9881	33.9227	AREG	29.4848	3.40263	2.91322	7.7773	3.108	2.51099	2.18249
chr13	51222304	51222454	FAM124A	139	+	49.5355	67.8224	144.086	112.232	41.9881	57.2446	FAM124A	136.367	1.36917	2.90874	2.26569	0.847637	1.15563	2.75291
chr15	66253681	66253831	MEGF11	20	-	5.06613	12.0573	14.6754	9.55169	10.497	10.6008	MEGF11	11.0568	2.37998	2.89677	1.8854	2.072	2.09248	2.18249
chr21	43075746	43075896	CBS	130	-	12.9468	21.8539	37.3556	37.0128	60.3579	61.4849	CBS	73.712	1.68798	2.88532	2.85884	4.66199	4.74904	5.69345
chr17	58755789	58755939	PPM1E	33	+	7.88064	11.3037	22.6802	13.1336	5.24852	12.721	PPM1E	35.0132	1.43436	2.87796	1.66657	0.666002	1.61421	4.44294
chr11	43942547	43942697	C11orf96	456	+	356.318	762.625	1023.28	694.885	275.547	197.176	C11orf96	545.469	2.14029	2.87182	1.95018	0.773318	0.553371	1.53085
chr19	43820555	43820705	LYPD5	38	-	6.75484	19.5931	19.3448	16.7155	20.9941	19.0815	LYPD5	23.9564	2.9006	2.86384	2.4746	3.10801	2.82486	3.54655
chr13	28495048	28495198	FLT1	102	-	112.581	162.02	321.525	234.016	73.4792	61.4849	FLT1	116.096	1.43914	2.85594	2.07865	0.652679	0.546139	1.03122
chr7	25180268	25180418	C7orf31	89	-	54.6016	101.734	155.426	102.681	81.352	21.2017	C7orf31	84.7688	1.86321	2.84655	1.88055	1.48992	0.388298	1.5525
chr15	99105004	99105154	SYNM	399	+	100.197	181.613	284.169	253.12	181.074	220.498	SYNM	351.975	1.81256	2.8361	2.52622	1.80718	2.20064	3.51283
chr1	24930209	24930359	RUNX3	109	-	15.7613	18.086	44.6932	63.2799	44.6124	57.2446	RUNX3	75.5548	1.14749	2.83563	4.01489	2.8305	3.63197	4.79369
chr1	15153682	15153832	TMEM51	64	+	37.1516	55.0115	104.729	128.948	70.855	42.4034	TMEM51	121.625	1.48073	2.81896	3.47086	1.90719	1.14136	3.27375
chr6	12290293	12290443	EDN1	30	+	41.6548	67.8224	117.403	40.5947	15.7455	8.48068	EDN1	12.8996	1.6282	2.81847	0.97455	0.378	0.203594	0.309679
chr1	110150472	110150622	SLC6A17	103	+	13.5097	26.3754	38.0226	105.069	34.1153	50.8841	SLC6A17	55.284	1.95233	2.81447	7.7773	2.52524	3.76649	4.09217
chr2	42493899	42494049	KCNG3	65	-	9.00645	16.5788	25.3484	26.2671	34.1153	53.0042	KCNG3	22.1136	1.84077	2.81447	2.91648	3.78787	5.88514	2.45531
chr11	125062991	125063141	SLC37A2	24	+	4.50322	3.01433	12.6742	16.7155	7.87277	4.24034	SLC37A2	20.2708	0.669372	2.81447	3.7119	1.74825	0.941624	4.5014
chrX	118974545	118974695	LONRF3	267	+	69.8	119.066	196.117	170.736	118.092	131.45	LONRF3	169.538	1.70582	2.8097	2.44607	1.69186	1.88324	2.42891
chr7	26152146	26152296	NFE2L3	36	+	18.5758	42.2006	52.0309	56.1162	52.4852	19.0815	NFE2L3	36.856	2.27181	2.801	3.02093	2.82546	1.02722	1.98409
chr5	95081568	95081718	MCTP1	27	-	14.0726	36.9255	39.3567	21.4913	10.497	14.8412	MCTP1	31.3276	2.62393	2.79669	1.52717	0.745918	1.05462	2.22614
chr4	83334771	83334921	HPSE	23	-	30.3968	64.0545	84.7171	41.7886	18.3698	6.36051	HPSE	20.2708	2.10728	2.78704	1.37477	0.604333	0.209249	0.666873
chr16	8674546	8674696	ABAT	136	+	52.35	107.009	145.42	71.6377	62.9822	38.163	ABAT	105.04	2.04411	2.77784	1.36844	1.2031	0.728997	2.00649
chr11	65354685	65354835	TIGD3	618	+	202.082	317.258	558.999	490.718	288.668	320.146	TIGD3	449.643	1.56995	2.7662	2.42831	1.42847	1.58424	2.22505
chr17	78923689	78923839	TIMP2	49	-	6.75484	21.8539	18.6778	16.7155	18.3698	8.48068	TIMP2	27.642	3.23529	2.7651	2.4746	2.7195	1.2555	4.09218
chr7	23470401	23470551	IGF2BP3	115	-	3.37742	6.78224	9.33889	16.7155	18.3698	19.0815	IGF2BP3	23.9564	2.00811	2.7651	4.94919	5.439	5.64973	7.09311
chr6	72182638	72182788	RIMS1	30	+	5.06613	7.53582	14.0083	14.3275	10.497	21.2017	RIMS1	7.3712	1.48749	2.76509	2.8281	2.072	4.18499	1.455
chr17	32350848	32350998	ZNF207	29	+	5.06613	15.0716	14.0083	22.6853	18.3698	10.6008	ZNF207	29.4848	2.97497	2.76509	4.47784	3.626	2.09248	5.81998
chr10	114404422	114404572	AFAP1L2	28	-	1.68871	3.76791	4.66944	23.8792	10.497	8.48068	AFAP1L2	22.1136	2.23124	2.76509	14.1405	6.21599	5.02199	13.095
chr22	36239452	36239602	APOL2	226	-	293.272	1311.99	807.814	321.175	110.219	61.4849	APOL2	180.594	4.47363	2.75449	1.09514	0.375825	0.209651	0.61579
chr12	52051374	52051524	NR4A1	139	+	101.885	152.977	280.167	335.503	118.092	114.489	NR4A1	178.752	1.50147	2.74984	3.29296	1.15907	1.12371	1.75445
chr7	117873402	117873552	CTTNBP2	45	-	7.31774	18.086	20.0119	23.8792	5.24852	12.721	CTTNBP2	35.0132	2.47153	2.73471	3.26319	0.717232	1.73838	4.7847
chr7	87059553	87059703	KIAA1324L	49	-	12.9468	18.8396	35.3544	35.8188	7.87277	31.8025	KIAA1324L	23.9564	1.45515	2.73074	2.76661	0.608086	2.4564	1.85037
chr18	31685388	31685538	B4GALT6	89	-	35.4629	67.8224	96.7242	128.948	73.4792	59.3647	B4GALT6	88.4544	1.91249	2.72748	3.63614	2.072	1.67399	2.49428
chr4	153684197	153684347	TLR2	38	+	34.3371	56.5187	93.3889	48.9524	13.1213	10.6008	TLR2	27.642	1.646	2.71977	1.42564	0.382132	0.308727	0.805018
chr2	169798968	169799118	SSB	159	+	9.56935	17.3324	26.0155	75.2195	62.9822	101.768	SSB	117.939	1.81124	2.71863	7.86046	6.58166	10.6348	12.3247
chr2	17878591	17878741	KCNS3	146	+	36.5887	73.0975	99.3925	93.1289	76.1035	57.2446	KCNS3	77.3976	1.99782	2.71648	2.54529	2.07997	1.56454	2.11534
chr1	46394235	46394385	FAAH	28	+	3.94032	14.3181	10.673	22.6853	15.7455	16.9614	FAAH	40.5416	3.63374	2.70866	5.75722	3.996	4.30457	10.2889
chr20	408018	408168	RBCK1	333	+	82.7467	216.278	223.466	271.029	157.455	154.772	RBCK1	374.088	2.61374	2.7006	3.27541	1.90286	1.87043	4.52088
chr20	62642429	62642579	SLCO4A1	252	+	36.5887	69.3296	98.0583	219.689	191.571	214.137	SLCO4A1	195.337	1.89484	2.68002	6.00429	5.2358	5.85254	5.33872
chr21	6467425	6467575	CBSL	119	-	12.9468	18.086	34.6873	29.849	57.7337	76.3261	CBSL	90.2972	1.39695	2.67922	2.30551	4.4593	5.89536	6.97448
chr6	136250205	136250355	MTFR2	46	-	15.1984	25.6218	40.6909	47.7584	55.1094	33.9227	MTFR2	38.6988	1.68582	2.67731	3.14233	3.626	2.23199	2.54624
chr10	121975086	121975236	NSMCE4A	259	-	87.8129	135.645	234.806	275.805	136.461	99.648	NSMCE4A	241.407	1.5447	2.67394	3.14083	1.554	1.13478	2.74911
chr2	70768092	70768242	ADD2	19	-	0	0	2.66825	1.19396	5.24852	6.36051	ADD2	5.5284	0	2.66825	1.19396	5.24852	6.36051	5.5284
chr1	161021068	161021218	F11R	32	-	0	3.01433	2.66825	9.55169	10.497	21.2017	F11R	9.214	3.01433	2.66825	9.55169	10.497	21.2017	9.214
chr4	83536237	83536387	GPAT3	41	+	0	2.26075	2.66825	21.4913	18.3698	16.9614	GPAT3	33.1704	2.26075	2.66825	21.4913	18.3698	16.9614	33.1704
chr17	48626511	48626661	HOXB9	45	-	0	0	2.66825	0	2.62426	21.2017	HOXB9	5.5284	0	2.66825	0	2.62426	21.2017	5.5284
chr6	138499348	138499498	NHSL1	28	-	0	2.26075	2.66825	0	2.62426	10.6008	NHSL1	23.9564	2.26075	2.66825	0	2.62426	10.6008	23.9564
chr11	8168953	8169103	RIC3	30	-	0	0	2.66825	13.1336	13.1213	19.0815	RIC3	31.3276	0	2.66825	13.1336	13.1213	19.0815	31.3276
chrX	70931020	70931170	SLC7A3	21	-	0	0.753582	2.66825	1.19396	2.62426	14.8412	SLC7A3	11.0568	0.753582	2.66825	1.19396	2.62426	14.8412	11.0568
chr19	3785200	3785350	MATK	23	-	2.25161	4.52149	6.00357	16.7155	5.24852	0	MATK	9.214	2.00811	2.66635	7.4238	2.33101	0	4.09218
chr7	129502487	129502637	SMKR1	65	+	2.25161	6.02866	6.00357	39.4007	36.7396	57.2446	SMKR1	57.1268	2.67749	2.66635	17.4989	16.317	25.4239	25.3715
chr3	194136073	194136223	HES1	860	+	130.593	238.132	345.539	513.403	362.148	360.429	HES1	779.504	1.82347	2.64592	3.93132	2.7731	2.75994	5.96896
chr2	218959588	218959738	CDK5R2	39	+	5.06613	8.28941	13.3413	20.2973	10.497	10.6008	CDK5R2	23.9564	1.63624	2.63343	4.00647	2.072	2.09248	4.72874
chr7	106284877	106285027	NAMPT	541	-	140.163	464.96	365.551	260.283	133.837	122.97	NAMPT	283.791	3.31728	2.60804	1.857	0.954867	0.877336	2.02472
chr3	197555892	197556042	BDH1	60	-	5.62903	12.8109	14.6754	22.6853	10.497	19.0815	BDH1	42.3844	2.27586	2.60709	4.03005	1.8648	3.38984	7.52961
chr2	74834062	74834212	HK2	297	+	189.698	398.645	493.627	278.193	157.455	125.09	HK2	221.136	2.10147	2.60217	1.4665	0.83003	0.659417	1.16573
chr19	16324759	16324909	KLF2	264	+	132.845	185.381	345.539	322.369	188.947	192.935	KLF2	351.975	1.39547	2.60107	2.42666	1.42231	1.45233	2.64952
chr5	138465405	138465555	EGR1	593	+	434.561	990.961	1130.01	777.269	272.923	192.935	EGR1	307.748	2.28037	2.60035	1.78863	0.628043	0.443977	0.708181
chr2	237692244	237692394	LRRFIP1	81	+	23.6419	24.1146	61.3698	56.1162	52.4852	44.5236	LRRFIP1	53.4412	1.01999	2.59581	2.37359	2.22001	1.88325	2.26044
chr4	74933038	74933188	PARM1	27	+	11.821	23.3611	30.6849	23.8792	15.7455	16.9614	PARM1	11.0568	1.97624	2.5958	2.02007	1.33199	1.43485	0.935352
chr6	27893354	27893504	HIST1H2BO	784	+	173.374	313.49	449.601	378.486	351.651	205.656	HIST1H2BO	635.766	1.80817	2.59324	2.18306	2.02828	1.1862	3.66702
chr3	129121520	129121670	RAB43	63	-	15.1984	45.2149	39.3567	31.043	36.7396	25.442	RAB43	38.6988	2.97498	2.58953	2.04252	2.41733	1.67399	2.54624
chr3	187368331	187368481	RTP4	22	+	27.5822	126.602	71.3758	45.3705	28.8668	4.24034	RTP4	33.1704	4.58999	2.58775	1.64492	1.04657	0.153735	1.2026
chr7	36367107	36367257	KIAA0895	40	-	6.19193	10.5502	16.0095	10.7456	7.87277	23.3219	KIAA0895	46.07	1.70386	2.58554	1.73542	1.27146	3.7665	7.44033
chr6	90296759	90296909	BACH2	89	-	12.3839	21.1003	32.019	37.0128	31.4911	55.1244	BACH2	51.5984	1.70385	2.58553	2.98878	2.54291	4.4513	4.16657
chr22	30968692	30968842	MORC2	96	-	12.9468	22.6075	33.3532	44.1766	47.2366	16.9614	MORC2	58.9696	1.74618	2.57617	3.41216	3.64852	1.31008	4.55476
chr1	207321618	207321768	CD55	276	+	79.3693	123.587	204.121	260.283	170.577	228.978	CD55	217.45	1.55711	2.57179	3.27939	2.14916	2.88497	2.73972
chr4	2059238	2059388	NAT8L	23	+	3.37742	7.53582	8.67182	16.7155	13.1213	14.8412	NAT8L	29.4848	2.23124	2.56759	4.94919	3.88501	4.39424	8.72998
chr19	13151267	13151417	STX10	37	-	13.5097	35.4184	34.6873	39.4007	28.8668	23.3219	STX10	57.1268	2.6217	2.56758	2.91647	2.13675	1.72631	4.22858
chr2	184598424	184598574	ZNF804A	28	+	13.5097	19.5931	34.6873	23.8792	7.87277	19.0815	ZNF804A	20.2708	1.4503	2.56758	1.76756	0.582749	1.41243	1.50046
chr6	35259477	35259627	ZNF76	44	+	24.2048	30.1433	62.0369	37.0128	26.2426	21.2017	ZNF76	58.9696	1.24534	2.563	1.52915	1.08419	0.87593	2.43628
chr8	33567052	33567202	RNF122	86	-	46.158	99.4729	118.07	84.7712	52.4852	36.0429	RNF122	79.2404	2.15505	2.55795	1.83654	1.13708	0.780859	1.71672
chr3	50503561	50503711	CACNA2D2	80	-	36.5887	69.3296	93.3889	115.814	62.9822	57.2446	CACNA2D2	77.3976	1.89484	2.5524	3.16529	1.72136	1.56454	2.11534
chrX	132023225	132023375	STK26	82	+	37.1516	68.576	94.723	72.8316	44.6124	19.0815	STK26	64.498	1.84584	2.54963	1.96039	1.20082	0.513612	1.73608
chr16	2340652	2340802	ABCA3	121	-	15.1984	21.8539	38.6897	51.3403	55.1094	53.0042	ABCA3	81.0832	1.43791	2.54564	3.37801	3.626	3.48749	5.33498
chr11	5689748	5689898	TRIM22	32	+	46.158	220.8	117.403	56.1162	23.6183	21.2017	TRIM22	44.2272	4.78357	2.5435	1.21574	0.511684	0.459329	0.95817
chr2	55693751	55693901	PNPT1	103	-	57.979	226.075	147.421	139.693	131.213	61.4849	PNPT1	110.568	3.89926	2.54266	2.40937	2.26311	1.06047	1.90704
chr7	13991251	13991401	ETV1	84	-	20.2645	49.7364	51.3639	74.0256	34.1153	23.3219	ETV1	53.4412	2.45436	2.53467	3.65297	1.6835	1.15087	2.63718
chr12	2876855	2877005	FOXM1	29	-	4.50322	9.79657	11.3401	28.6551	5.24852	10.6008	FOXM1	25.7992	2.17546	2.51822	6.36325	1.1655	2.35405	5.72906
chr10	24466465	24466615	KIAA1217	21	+	4.50322	6.78224	11.3401	31.043	36.7396	19.0815	KIAA1217	29.4848	1.50609	2.51822	6.89351	8.15852	4.2373	6.54749
chr22	36160682	36160832	APOL3	21	-	40.529	151.47	101.394	40.5947	31.4911	8.48068	APOL3	31.3276	3.73732	2.50176	1.00162	0.777002	0.20925	0.772968
chr17	44947485	44947635	KIF18B	31	-	5.06613	6.02866	12.6742	27.4611	28.8668	12.721	KIF18B	35.0132	1.18999	2.50175	5.42053	5.698	2.51099	6.91123
chr17	44708612	44708762	DBF4B	67	+	21.9532	46.7221	54.6992	51.3403	26.2426	21.2017	DBF4B	53.4412	2.12826	2.49163	2.33862	1.19539	0.965768	2.43432
chr9	2621503	2621653	VLDLR	183	+	42.2177	58.0258	104.729	100.293	81.352	97.5278	VLDLR	128.996	1.37444	2.48069	2.37561	1.92696	2.31012	3.0555
chr5	69189528	69189678	CENPH	73	+	12.3839	39.1863	30.6849	62.086	34.1153	38.163	CENPH	62.6552	3.16429	2.47781	5.01344	2.75481	3.08166	5.05941
chr15	25863296	25863446	ATP10A	41	-	20.2645	80.6333	50.0298	33.4309	13.1213	14.8412	ATP10A	35.0132	3.97904	2.46884	1.64973	0.647502	0.732374	1.72781
chr20	1325682	1325832	SDCBP2	94	-	48.9726	128.863	120.738	95.5169	44.6124	33.9227	SDCBP2	71.8692	2.63133	2.46542	1.95042	0.910967	0.692687	1.46754
chr9	87974435	87974585	CDK20	27	-	14.0726	24.1146	34.6873	22.6853	10.497	8.48068	CDK20	12.8996	1.71359	2.46488	1.61202	0.745918	0.602638	0.916647
chr7	95596452	95596602	PDK4	66	-	14.6355	26.3754	36.0214	52.5343	28.8668	38.163	PDK4	40.5416	1.80215	2.46123	3.58951	1.97238	2.60756	2.77009
chr3	148697825	148697975	AGTR1	25	+	15.7613	45.2149	38.6897	19.1034	5.24852	6.36051	AGTR1	11.0568	2.86873	2.45473	1.21204	0.333	0.403552	0.701516
chr8	72536932	72537082	KCNB2	56	+	24.7677	24.1146	60.7028	52.5343	31.4911	33.9227	KCNB2	40.5416	0.973631	2.45089	2.12108	1.27146	1.36963	1.63687
chr8	22130939	22131089	HR	95	-	8.44354	16.5788	20.679	44.1766	23.6183	12.721	HR	38.6988	1.96349	2.44909	5.232	2.7972	1.5066	4.58324
chr7	23680116	23680266	FAM221A	58	+	16.8871	18.8396	41.3579	70.4437	44.6124	40.2832	FAM221A	49.7556	1.11562	2.44908	4.17145	2.6418	2.38544	2.94637
chr1	44843173	44843323	PTCH2	34	-	9.00645	16.5788	22.0131	31.043	26.2426	27.5622	PTCH2	42.3844	1.84077	2.44415	3.44675	2.91376	3.06027	4.70601
chr8	24913689	24913839	NEFM	23	+	10.1323	24.1146	24.6813	44.1766	13.1213	27.5622	NEFM	20.2708	2.37997	2.4359	4.35998	1.295	2.72023	2.00061
chr1	38046711	38046861	POU3F1	45	-	21.3903	39.1863	52.0309	33.4309	36.7396	67.8454	POU3F1	27.642	1.83197	2.43245	1.5629	1.71758	3.17178	1.29227
chr4	170026288	170026438	MFAP3L	57	-	10.6952	22.6075	26.0155	56.1162	62.9822	42.4034	MFAP3L	73.712	2.1138	2.43245	5.24686	5.88883	3.96471	6.89206
chr21	36966265	36966415	HLCS	209	-	32.6484	33.9112	79.3805	90.741	73.4792	84.8068	HLCS	68.1836	1.03868	2.43137	2.77934	2.25062	2.59758	2.08842
chr3	139935110	139935260	CLSTN2	155	+	62.4822	100.226	151.423	125.366	89.2248	74.2059	CLSTN2	110.568	1.60407	2.42346	2.00643	1.428	1.18763	1.76959
chr9	99821771	99821921	NR4A3	117	+	63.0451	109.269	152.09	134.918	52.4852	57.2446	NR4A3	88.4544	1.73319	2.4124	2.14002	0.832502	0.907994	1.40303
chr5	178113510	178113660	N4BP3	37	+	15.7613	27.8825	38.0226	40.5947	26.2426	23.3219	N4BP3	31.3276	1.76905	2.4124	2.57559	1.665	1.47969	1.98763
chr10	4826128	4826278	AKR1E2	154	+	45.0322	63.3009	108.064	85.9652	57.7337	44.5236	AKR1E2	97.6684	1.40568	2.39971	1.90897	1.28205	0.988706	2.16886
chr2	40452296	40452446	SLC8A1	17	-	9.56935	50.49	22.6802	19.1034	5.24852	10.6008	SLC8A1	7.3712	5.27622	2.37009	1.99631	0.548472	1.10779	0.770293
chr11	123654530	123654680	SCN3B	34	-	5.62903	6.78224	13.3413	19.1034	2.62426	8.48068	SCN3B	14.7424	1.20487	2.37009	3.39373	0.466201	1.5066	2.61899
chr9	126613872	126614022	LMX1B	24	+	2.81451	3.01433	6.67063	14.3275	5.24852	36.0429	LMX1B	7.3712	1.071	2.37009	5.09058	1.86481	12.8061	2.619
chr1	39639571	39639721	HEYL	22	-	2.25161	3.76791	5.33651	9.55169	5.24852	4.24034	HEYL	5.5284	1.67343	2.37009	4.24216	2.33101	1.88325	2.45531
chr12	57455217	57455367	INHBE	52	+	0.562903	1.50716	1.33413	1.19396	10.497	16.9614	INHBE	36.856	2.67748	2.37009	2.12108	18.648	30.132	65.4749
chr14	36661802	36661952	PAX9	27	+	0.562903	0	1.33413	3.58188	2.62426	14.8412	PAX9	1.8428	0	2.37009	6.36323	4.66201	26.3655	3.27374
chr13	78603484	78603634	POU4F1	60	-	0.562903	1.50716	1.33413	1.19396	2.62426	8.48068	POU4F1	0	2.67748	2.37009	2.12108	4.66201	15.066	0
chr11	60952232	60952382	SLC15A3	24	-	15.1984	91.1835	36.0214	13.1336	7.87277	10.6008	SLC15A3	16.5852	5.99955	2.37008	0.864144	0.518	0.697494	1.09125
chr19	38229594	38229744	DPF1	40	-	12.3839	15.8252	29.3508	50.1464	36.7396	29.6824	DPF1	57.1268	1.27788	2.37008	4.04932	2.96672	2.39685	4.61299
chr1	3069139	3069289	PRDM16	24	+	4.50322	13.5645	10.673	3.58188	10.497	8.48068	PRDM16	5.5284	3.01218	2.37008	0.795404	2.331	1.88325	1.22765
chr17	5116418	5116568	USP6	37	+	1.68871	6.78224	4.00238	7.16377	7.87277	21.2017	USP6	20.2708	4.01623	2.37008	4.24216	4.662	12.555	12.0037
chrX	20116833	20116983	MAP7D2	54	-	1.12581	4.52149	2.66825	20.2973	20.9941	27.5622	MAP7D2	51.5984	4.01621	2.37007	18.0291	18.648	24.4821	45.8322
chr2	207769828	207769978	FZD5	281	-	78.2435	144.688	184.777	133.724	120.716	133.571	FZD5	136.367	1.8492	2.36156	1.70907	1.54282	1.70712	1.74285
chr6	93419478	93419628	EPHA7	51	-	36.5887	85.9084	86.0512	85.9652	44.6124	33.9227	EPHA7	106.882	2.34795	2.35185	2.3495	1.21929	0.927136	2.92118
chr11	58578418	58578568	ZFP91	65	+	22.5161	34.6648	52.698	45.3705	34.1153	21.2017	ZFP91	40.5416	1.53956	2.34046	2.01502	1.51515	0.941624	1.80056
chr11	58578418	58578568	ZFP91-CNTF	65	+	22.5161	34.6648	52.698	45.3705	34.1153	21.2017	ZFP91-CNTF	40.5416	1.53956	2.34046	2.01502	1.51515	0.941624	1.80056
chr15	44729048	44729198	TRIM69	144	+	79.9322	324.04	186.778	181.482	125.964	91.1673	TRIM69	152.952	4.05394	2.33671	2.27045	1.57589	1.14056	1.91352
chr11	57567563	57567713	UBE2L6	117	-	160.427	613.416	374.223	222.077	131.213	78.4463	UBE2L6	143.738	3.82365	2.33267	1.38429	0.817898	0.488984	0.895971
chr4	42657003	42657153	ATP8A1	52	-	16.3242	27.129	38.0226	38.2067	26.2426	21.2017	ATP8A1	40.5416	1.66189	2.32922	2.34049	1.60759	1.29879	2.48353
chr9	17579045	17579195	SH3GL2	91	+	16.3242	21.8539	38.0226	54.9222	28.8668	44.5236	SH3GL2	58.9696	1.33874	2.32922	3.36447	1.76834	2.72746	3.6124
chr11	73983182	73983332	UCP2	88	-	16.3242	26.3754	38.0226	53.7282	41.9881	27.5622	UCP2	47.9128	1.61572	2.32922	3.29132	2.57214	1.68843	2.93508
chr14	102086969	102087119	HSP90AA1	2170	-	405.29	758.104	942.561	602.95	398.887	415.553	HSP90AA1	663.408	1.87052	2.32565	1.4877	0.984201	1.02532	1.63687
chr15	48178239	48178389	MYEF2	88	-	14.0726	13.5645	32.6861	78.8014	34.1153	33.9227	MYEF2	73.712	0.963894	2.32268	5.59963	2.42424	2.41055	5.23798
chr2	151357520	151357670	TNFAIP6	123	+	80.4951	194.424	186.778	112.232	62.9822	38.163	TNFAIP6	88.4544	2.41535	2.32036	1.39427	0.782435	0.474103	1.09888
chr7	16753708	16753858	TSPAN13	134	+	24.2048	39.9399	56.0333	69.2497	49.8609	48.7639	TSPAN13	75.5548	1.65008	2.31497	2.86099	2.05996	2.01464	3.12148
chr6	14117676	14117826	CD83	79	+	33.2113	64.0545	76.7123	142.081	65.6064	31.8025	CD83	116.096	1.9287	2.30983	4.27809	1.97542	0.957581	3.49568
chr1	201023593	201023743	KIF21B	47	-	10.1323	12.8109	23.3472	34.6249	23.6183	31.8025	KIF21B	36.856	1.26436	2.30423	3.41728	2.33099	3.13872	3.63748
chr13	30906201	30906351	MEDAG	86	+	29.271	30.1433	67.3734	127.754	26.2426	67.8454	MEDAG	53.4412	1.0298	2.30171	4.36452	0.896539	2.31784	1.82574
chr16	72093808	72093958	DHX38	92	+	37.7145	67.0688	86.7182	84.7712	57.7337	33.9227	DHX38	70.0264	1.77833	2.29933	2.24771	1.53081	0.89946	1.85675
chr6	107115200	107115350	BEND3	43	-	9.00645	6.78224	20.679	21.4913	39.3639	23.3219	BEND3	22.1136	0.753043	2.29602	2.38621	4.37063	2.58947	2.45531
chr2	71227015	71227165	PAIP2B	54	-	9.00645	19.5931	20.679	15.5215	20.9941	21.2017	PAIP2B	31.3276	2.17545	2.29602	1.72338	2.33101	2.35406	3.47835
chr1	24502453	24502603	RCAN3	34	+	9.00645	6.02866	20.679	22.6853	10.497	10.6008	RCAN3	7.3712	0.669371	2.29602	2.51878	1.1655	1.17702	0.818436
chr1	45340131	45340281	TOE1	139	+	45.5951	58.0258	104.062	173.124	86.6005	86.9269	TOE1	173.223	1.27263	2.28231	3.79699	1.89934	1.9065	3.79916
chr21	6111062	6111212	SIK1B	302	+	96.8193	164.281	220.798	186.258	139.086	159.013	SIK1B	237.721	1.69678	2.28052	1.92377	1.43655	1.64237	2.45531
chr14	103123386	103123536	TNFAIP2	983	+	689.556	1251.7	1572.27	1137.84	456.621	315.905	TNFAIP2	895.601	1.81523	2.28012	1.65011	0.662196	0.458128	1.29881
chr8	126558330	126558480	LRATD2	107	-	21.3903	37.6791	48.6956	47.7584	49.8609	57.2446	LRATD2	64.498	1.7615	2.27653	2.23271	2.33101	2.67619	3.01529
chr12	89352411	89352561	DUSP6	472	-	139.6	305.201	317.522	280.581	230.935	222.618	DUSP6	353.818	2.18625	2.27451	2.00989	1.65426	1.59468	2.53451
chr15	28886088	28886238	APBA2	200	+	46.158	82.8941	104.729	127.754	76.1035	97.5278	APBA2	202.708	1.79588	2.26892	2.76775	1.64876	2.11291	4.39161
chr8	122781713	122781863	ZHX2	45	+	12.3839	21.8539	28.0167	26.2671	10.497	4.24034	ZHX2	42.3844	1.7647	2.26235	2.12107	0.847633	0.342407	3.42254
chr5	74866275	74866425	FAM169A	34	-	6.19193	7.53582	14.0083	33.4309	26.2426	23.3219	FAM169A	29.4848	1.21704	2.26235	5.39911	4.23819	3.7665	4.76181
chr12	13196705	13196855	EMP1	661	+	166.056	305.954	375.557	450.123	257.177	154.772	EMP1	409.102	1.84247	2.26163	2.71067	1.54874	0.932047	2.46364
chr5	36606539	36606689	SLC1A3	59	+	57.979	160.513	130.077	102.681	55.1094	27.5622	SLC1A3	82.926	2.76847	2.24352	1.771	0.950506	0.475382	1.43028
chr11	5684964	5685114	TRIM5	99	-	70.3629	263.754	157.427	134.918	83.9762	31.8025	TRIM5	92.14	3.74848	2.23736	1.91746	1.19347	0.451978	1.3095
chr17	78979852	78980002	LGALS3BP	20	-	29.8339	109.269	66.7063	38.2067	18.3698	19.0815	LGALS3BP	25.7992	3.66258	2.23592	1.28065	0.615736	0.639591	0.864761
chr1	186828896	186829046	PLA2G4A	41	+	29.8339	99.4729	66.7063	69.2497	31.4911	16.9614	PLA2G4A	46.07	3.33422	2.23592	2.32117	1.05555	0.568528	1.54422
chr16	3264644	3264794	ZNF263	151	+	54.0387	90.4299	120.738	130.142	68.2307	72.0858	ZNF263	119.782	1.67343	2.23429	2.40831	1.26263	1.33397	2.2166
chr1	112674849	112674999	MOV10	54	+	38.2774	125.848	85.3841	63.2799	55.1094	42.4034	MOV10	60.8124	3.28779	2.23067	1.65319	1.43974	1.10779	1.58873
chr8	29263004	29263154	KIF13B	86	-	45.5951	82.1405	101.394	100.293	78.7277	57.2446	KIF13B	92.14	1.80152	2.22379	2.19964	1.72667	1.2555	2.02083
chr9	83817414	83817564	GKAP1	37	-	9.00645	8.28941	20.0119	39.4007	31.4911	36.0429	GKAP1	23.9564	0.920386	2.22195	4.37472	3.49651	4.0019	2.65992
chr3	151085627	151085777	MED12L	40	+	21.9532	40.6934	48.6956	72.8316	36.7396	21.2017	MED12L	58.9696	1.85364	2.21815	3.31758	1.67354	0.965768	2.68615
chr5	151020516	151020666	GPX3	88	+	25.8935	30.8969	57.3675	28.6551	34.1153	31.8025	GPX3	53.4412	1.19323	2.21552	1.10665	1.31752	1.2282	2.06388
chr17	75525649	75525799	LLGL2	56	+	8.44354	6.78224	18.6778	33.4309	44.6124	48.7639	LLGL2	23.9564	0.803246	2.21208	3.95935	5.28361	5.77529	2.83725
chrX	17737467	17737617	SCML1	88	+	29.271	47.4757	64.7052	85.9652	70.855	53.0042	SCML1	119.782	1.62194	2.21056	2.93687	2.42066	1.81081	4.09217
chr13	110561614	110561764	RAB20	46	-	45.5951	102.487	100.727	124.172	83.9762	31.8025	RAB20	92.14	2.24776	2.20916	2.72336	1.84178	0.697498	2.02083
chr8	143986354	143986504	PARP10	22	-	39.9661	115.298	88.0524	45.3705	23.6183	14.8412	PARP10	27.642	2.88489	2.20318	1.13522	0.590958	0.371345	0.691636
chr3	48466183	48466333	TREX1	105	+	78.8064	271.29	173.436	170.736	102.346	69.9656	TREX1	136.367	3.44249	2.20079	2.16652	1.2987	0.887816	1.73041
chr12	95790608	95790758	NTN4	22	-	15.7613	24.1146	34.6873	39.4007	18.3698	25.442	NTN4	29.4848	1.52999	2.20079	2.49984	1.1655	1.61421	1.87071
chr2	68157839	68157989	PNO1	154	+	58.5419	79.8797	128.743	128.948	73.4792	74.2059	PNO1	116.096	1.36449	2.19916	2.20266	1.25516	1.26757	1.98313
chr7	122144170	122144320	AASS	272	-	115.395	269.029	253.484	119.396	102.346	74.2059	AASS	103.197	2.33137	2.19666	1.03467	0.886919	0.64306	0.894294
chr13	21671007	21671157	FGF9	59	+	25.8935	29.3897	56.7004	106.263	89.2248	101.768	FGF9	81.0832	1.13502	2.18975	4.10385	3.44584	3.93025	3.13141
chr3	122564160	122564310	PARP9	68	-	75.429	321.78	164.765	115.814	57.7337	33.9227	PARP9	88.4544	4.266	2.18437	1.5354	0.765405	0.44973	1.17268
chr12	57488001	57488151	MARS	311	+	84.9983	145.441	185.444	157.603	152.207	142.051	MARS	311.433	1.7111	2.18174	1.85419	1.79071	1.67122	3.66399
chr14	74955522	74955672	PGF	251	-	84.4354	154.484	184.11	149.245	83.9762	50.8841	PGF	127.153	1.82961	2.18048	1.76756	0.994562	0.602639	1.50592
chr17	49230696	49230846	PHOSPHO1	21	-	6.75484	6.78224	14.6754	32.2369	18.3698	36.0429	PHOSPHO1	29.4848	1.00406	2.17258	4.77242	2.7195	5.33586	4.36499
chr12	95942903	95943053	CCDC38	22	-	3.37742	1.50716	7.3377	19.1034	18.3698	16.9614	CCDC38	20.2708	0.446246	2.17258	5.65621	5.439	5.022	6.00186
chr17	43211803	43211953	TMEM106A	53	+	70.3629	149.209	152.758	102.681	28.8668	14.8412	TMEM106A	53.4412	2.12056	2.171	1.45931	0.410256	0.210924	0.759508
chr1	209938160	209938310	SYT14	144	+	60.2306	101.734	130.077	99.0988	41.9881	48.7639	SYT14	106.882	1.68907	2.15965	1.64532	0.697122	0.80962	1.77455
chr6	149923026	149923176	RAET1G	105	-	63.0451	163.527	136.081	82.3833	55.1094	36.0429	RAET1G	81.0832	2.59381	2.15847	1.30674	0.874127	0.5717	1.28611
chrX	18984915	18985065	PHKA2	31	-	20.8274	34.6648	44.6932	40.5947	20.9941	14.8412	PHKA2	23.9564	1.66438	2.14588	1.9491	1.008	0.712581	1.15023
chr15	82709795	82709945	AP3B2	118	-	103.011	189.903	220.131	97.9048	26.2426	33.9227	AP3B2	58.9696	1.84352	2.13697	0.950431	0.254755	0.329311	0.572459
chr4	102345406	102345556	SLC39A8	81	-	74.3032	131.877	158.761	108.65	44.6124	29.6824	SLC39A8	71.8692	1.77485	2.13666	1.46225	0.60041	0.399477	0.967242
chr7	30284916	30285066	ZNRF2	98	+	53.4758	129.616	114.068	102.681	60.3579	38.163	ZNRF2	88.4544	2.42383	2.13308	1.92014	1.1287	0.71365	1.6541
chr1	175192734	175192884	KIAA0040	16	-	2.81451	6.78224	6.00357	7.16377	15.7455	6.36051	KIAA0040	3.6856	2.40974	2.13308	2.5453	5.5944	2.2599	1.3095
chr14	93185208	93185358	TMEM251	130	+	36.0258	52.7508	76.7123	103.875	62.9822	44.5236	TMEM251	92.14	1.46425	2.12937	2.88335	1.74825	1.23588	2.55761
chr9	21995241	21995391	CDKN2A	68	-	43.9064	80.6333	93.3889	66.8618	39.3639	10.6008	CDKN2A	70.0264	1.83648	2.127	1.52283	0.896541	0.241441	1.5949
chr17	61863422	61863572	BRIP1	29	-	35.4629	91.937	75.3782	65.6678	18.3698	10.6008	BRIP1	20.2708	2.59248	2.12555	1.85173	0.518001	0.298926	0.571606
chr22	30246682	30246832	LIF	181	-	16.3242	61.0402	34.6873	127.754	55.1094	86.9269	LIF	117.939	3.73925	2.1249	7.82605	3.37593	5.32503	7.2248
chr7	129434362	129434512	STRIP2	167	+	107.514	212.51	227.469	211.331	133.837	108.129	STRIP2	206.394	1.97658	2.11572	1.96561	1.24483	1.00572	1.91969
chr20	18507488	18507638	SEC23B	93	+	25.8935	39.9399	54.6992	63.2799	44.6124	23.3219	SEC23B	77.3976	1.54247	2.11247	2.44385	1.72292	0.900686	2.98907
chr17	43267484	43267634	CCDC200	199	-	63.608	79.1261	134.08	164.767	76.1035	67.8454	CCDC200	71.8692	1.24396	2.10791	2.59035	1.19645	1.06662	1.12988
chr15	41332834	41332984	NUSAP1	134	+	45.5951	85.1548	96.0571	139.693	91.849	59.3647	NUSAP1	158.481	1.86763	2.10674	3.06377	2.01445	1.302	3.47583
chr3	46812478	46812628	PRSS50	28	-	5.06613	8.28941	10.673	14.3275	5.24852	8.48068	PRSS50	25.7992	1.63624	2.10674	2.8281	1.036	1.674	5.09249
chr10	91220644	91220794	PCGF5	91	+	120.461	358.705	252.817	167.155	86.6005	74.2059	PCGF5	164.009	2.97777	2.09875	1.38763	0.718909	0.616016	1.36151
chr22	50481491	50481641	ADM2	255	+	36.5887	53.5043	76.7123	41.7886	110.219	125.09	ADM2	193.494	1.46232	2.09661	1.14212	3.01238	3.41882	5.28835
chrX	72131862	72132012	RTL5	311	-	88.9387	198.946	186.111	105.069	97.0975	74.2059	RTL5	141.896	2.23689	2.09258	1.18136	1.09174	0.834349	1.59544
chr15	89575426	89575576	TICRR	44	+	28.7081	48.2293	60.0357	101.487	47.2366	25.442	TICRR	49.7556	1.67999	2.09125	3.53513	1.64541	0.886231	1.73316
chr9	127828456	127828606	ENG	145	-	52.35	142.427	109.398	128.948	89.2248	40.2832	ENG	75.5548	2.72067	2.08974	2.46319	1.70439	0.769498	1.44326
chr19	44025306	44025456	ZNF222	84	+	42.7806	72.3439	89.3865	56.1162	34.1153	19.0815	ZNF222	60.8124	1.69104	2.08942	1.31172	0.797448	0.446032	1.42149
chr5	33440908	33441058	TARS	469	+	91.1903	180.106	190.113	193.422	215.189	205.656	TARS	315.119	1.97506	2.08479	2.12108	2.35978	2.25524	3.45562
chr10	95561297	95561447	SORBS1	176	-	127.779	214.771	265.491	165.961	102.346	101.768	SORBS1	193.494	1.6808	2.07774	1.29881	0.800961	0.796438	1.51429
chr6	85450009	85450159	NT5E	95	+	69.8	137.906	144.753	237.598	133.837	114.489	NT5E	165.852	1.97573	2.07383	3.40398	1.91744	1.64024	2.3761
chr9	137877725	137877875	CACNA1B	32	+	2.25161	2.26075	4.66944	4.77584	31.4911	38.163	CACNA1B	18.428	1.00406	2.07382	2.12108	13.986	16.9492	8.18437
chr22	31122901	31123051	INPP5J	27	+	2.25161	3.01433	4.66944	11.9396	10.497	19.0815	INPP5J	16.5852	1.33874	2.07382	5.30269	4.662	8.4746	7.36593
chr20	50731306	50731456	PARD6B	117	+	2.25161	4.52149	4.66944	20.2973	44.6124	59.3647	PARD6B	33.1704	2.00811	2.07382	9.01457	19.8136	26.3654	14.7319
chr4	6472521	6472671	PPP2R2C	32	-	2.25161	0.753582	4.66944	9.55169	7.87277	33.9227	PPP2R2C	20.2708	0.334686	2.07382	4.24216	3.49651	15.066	9.0028
chr22	43862423	43862573	SULT4A1	18	-	2.25161	0	4.66944	14.3275	5.24852	21.2017	SULT4A1	20.2708	0	2.07382	6.36322	2.33101	9.41624	9.0028
chr11	65261890	65262040	POLA2	152	+	100.197	211.003	207.457	213.719	120.716	78.4463	POLA2	221.136	2.10588	2.07049	2.13299	1.20479	0.782921	2.20701
chr19	1524003	1524153	PLK5	680	+	410.919	753.582	850.506	786.82	307.038	292.583	PLK5	493.87	1.83389	2.06977	1.91478	0.747198	0.712021	1.20187
chr21	43427050	43427200	SIK1	287	-	90.0645	153.731	186.111	239.986	152.207	159.013	SIK1	230.35	1.7069	2.06642	2.6646	1.68998	1.76555	2.55761
chr17	73232378	73232528	C17orf80	80	+	43.3435	73.8511	89.3865	101.487	73.4792	53.0042	C17orf80	90.2972	1.70386	2.06228	2.34146	1.69528	1.22289	2.08329
chr7	21427448	21427598	SP4	161	+	32.0855	57.2723	66.0393	112.232	73.4792	42.4034	SP4	90.2972	1.78499	2.05823	3.4979	2.29011	1.32158	2.81427
chr8	22693394	22693544	EGR3	25	-	27.5822	50.49	56.7004	75.2195	34.1153	14.8412	EGR3	27.642	1.83053	2.05569	2.7271	1.23686	0.538072	1.00217
chr4	102500995	102501145	NFKB1	75	+	42.2177	76.8654	86.7182	100.293	23.6183	23.3219	NFKB1	68.1836	1.82069	2.05407	2.37561	0.559441	0.55242	1.61505
chr14	75278754	75278904	FOS	899	+	476.779	1008.29	979.249	715.183	388.39	358.309	FOS	633.923	2.1148	2.05388	1.50003	0.814612	0.75152	1.3296
chr16	87869427	87869577	SLC7A5	486	-	301.716	424.267	619.035	759.359	750.538	854.428	SLC7A5	1092.78	1.40618	2.05171	2.5168	2.48756	2.83189	3.62188
chr15	41493793	41493943	ITPKA	65	+	35.4629	50.49	72.7099	47.7584	26.2426	38.163	ITPKA	23.9564	1.42374	2.05031	1.34671	0.740002	1.07614	0.675534
chr14	80941648	80941798	CEP128	33	-	12.3839	25.6218	25.3484	34.6249	23.6183	14.8412	CEP128	38.6988	2.06896	2.04688	2.79596	1.90718	1.19843	3.12493
chr3	45995696	45995846	FYCO1	145	-	123.276	231.35	252.15	144.469	81.352	72.0858	FYCO1	132.682	1.87668	2.04541	1.17192	0.659918	0.584751	1.0763
chr10	93496565	93496715	CEP55	62	+	28.7081	35.4184	58.7016	95.5169	23.6183	16.9614	CEP55	51.5984	1.23374	2.04477	3.32718	0.822705	0.590823	1.79735
chr18	2571387	2571537	METTL4	74	-	22.5161	42.9542	46.0274	44.1766	65.6064	76.3261	METTL4	47.9128	1.90771	2.0442	1.962	2.91376	3.38985	2.12794
chr14	64338535	64338685	ESR2	258	-	83.8725	142.427	171.435	126.56	81.352	72.0858	ESR2	152.952	1.69814	2.044	1.50896	0.969948	0.859469	1.82363
chr6	20401831	20401981	E2F3	210	+	61.3564	116.052	125.408	179.094	136.461	89.0471	E2F3	235.878	1.89144	2.04393	2.91891	2.22407	1.45131	3.84439
chr17	7650854	7651004	ATP1B2	29	+	55.1645	59.533	112.734	134.918	62.9822	40.2832	ATP1B2	81.0832	1.07919	2.0436	2.44574	1.14172	0.730238	1.46984
chr5	132490699	132490849	IRF1	831	-	454.826	1267.53	929.219	796.372	404.136	307.425	IRF1	875.33	2.78685	2.04302	1.75094	0.888551	0.675918	1.92454
chr15	73994684	73994834	PML	238	+	147.481	491.336	300.846	230.434	141.71	114.489	PML	193.494	3.33152	2.0399	1.56247	0.96087	0.776297	1.31199
chr8	144326777	144326927	DGAT1	2079	-	499.295	1021.86	1017.27	567.131	367.396	301.064	DGAT1	742.648	2.04661	2.03741	1.13586	0.73583	0.602978	1.48739
chr12	95548709	95548859	USP44	59	-	19.7016	19.5931	40.0238	82.3833	34.1153	36.0429	USP44	46.07	0.994493	2.0315	4.18155	1.7316	1.82944	2.33839
chr5	149271793	149271943	AFAP1L1	63	+	29.271	43.7078	59.3686	131.336	41.9881	31.8025	AFAP1L1	58.9696	1.49321	2.02824	4.4869	1.43446	1.08648	2.01461
chr12	107318352	107318502	BTBD11	93	+	40.529	73.0975	82.0488	83.5773	83.9762	65.7252	BTBD11	141.896	1.80359	2.02445	2.06216	2.072	1.62168	3.5011
chr17	44968237	44968387	C1QL1	29	-	13.5097	21.8539	27.3496	33.4309	26.2426	16.9614	C1QL1	25.7992	1.61765	2.02444	2.47458	1.9425	1.2555	1.90968
chr14	92748551	92748701	LGMN	248	-	151.984	331.576	307.516	208.943	81.352	84.8068	LGMN	173.223	2.18165	2.02334	1.37477	0.535267	0.557998	1.13974
chr19	37466818	37466968	ZNF569	129	-	69.2371	107.762	140.083	127.754	83.9762	48.7639	ZNF569	93.9828	1.55642	2.02324	1.84517	1.21288	0.704303	1.35741
chr11	18322060	18322210	HPS5	845	-	504.361	911.081	1019.94	724.734	535.349	296.824	HPS5	683.679	1.80641	2.02224	1.43694	1.06144	0.588515	1.35554
chr2	237859553	237859703	RAMP1	24	+	28.7081	42.9542	58.0345	40.5947	7.87277	4.24034	RAMP1	46.07	1.49624	2.02154	1.41405	0.274235	0.147705	1.60477
chr12	27332824	27332974	ARNTL2	103	+	43.9064	86.662	88.7194	144.469	73.4792	99.648	ARNTL2	140.053	1.97379	2.02065	3.29039	1.67354	2.26956	3.18981
chr8	41828795	41828945	ANK1	300	-	24.7677	48.2293	50.0298	84.7712	70.855	57.2446	ANK1	92.14	1.94727	2.01996	3.42265	2.86078	2.31126	3.72017
chr2	64989321	64989471	SLC1A4	352	+	100.76	154.484	203.454	111.038	173.201	175.974	SLC1A4	246.935	1.53319	2.01919	1.102	1.71895	1.74647	2.45072
chr11	5624969	5625119	TRIM34	33	+	20.8274	161.267	42.025	41.7886	31.4911	19.0815	TRIM34	42.3844	7.74302	2.01777	2.00642	1.512	0.916173	2.03503
chr1	109397829	109397979	SORT1	89	-	58.5419	86.662	118.07	120.59	44.6124	53.0042	SORT1	90.2972	1.48034	2.01685	2.05989	0.762059	0.905406	1.54244
chr6	105137090	105137240	BVES	59	-	50.0984	64.0545	100.727	72.8316	41.9881	38.163	BVES	60.8124	1.27857	2.01058	1.45377	0.838113	0.761761	1.21386
chr6	32844560	32844710	PSMB8	105	-	47.8468	227.582	96.0571	106.263	91.849	78.4463	PSMB8	105.04	4.75647	2.0076	2.2209	1.91965	1.63953	2.19534
chr3	52154307	52154457	POC1A	36	-	21.9532	21.1003	44.0262	74.0256	52.4852	33.9227	POC1A	62.6552	0.961149	2.00546	3.37197	2.39078	1.54523	2.85403
chr11	115504339	115504489	CADM1	636	-	416.548	899.777	835.163	431.02	270.299	180.214	CADM1	436.744	2.16008	2.00496	1.03474	0.648902	0.432637	1.04848
chr5	1883312	1883462	IRX4	22	-	0	0.753582	2.00119	0	2.62426	10.6008	IRX4	3.6856	0.753582	2.00119	0	2.62426	10.6008	3.6856
chr19	35248933	35249083	LSR	106	+	0	0.753582	2.00119	8.35773	86.6005	57.2446	LSR	9.214	0.753582	2.00119	8.35773	86.6005	57.2446	9.214
chr1	237042110	237042260	RYR2	24	+	19.7016	29.3897	39.3567	15.5215	15.7455	8.48068	RYR2	11.0568	1.49174	1.99764	0.787829	0.799199	0.430456	0.561213
chr21	25734918	25735068	GABPA	54	+	30.3968	60.2866	60.7028	29.849	13.1213	25.442	GABPA	57.1268	1.98332	1.99701	0.981978	0.431667	0.836996	1.87937
chr17	68291888	68292038	SLC16A6	80	-	10.6952	10.5502	21.346	29.849	31.4911	27.5622	SLC16A6	55.284	0.986443	1.99585	2.79088	2.94441	2.57706	5.16905
chr9	137302197	137302347	NRARP	139	-	23.079	30.1433	46.0274	60.892	62.9822	116.609	NRARP	68.1836	1.30609	1.99434	2.63842	2.72898	5.0526	2.95436
chr2	37156896	37157046	EIF2AK2	112	-	111.455	369.255	222.132	177.9	78.7277	55.1244	EIF2AK2	128.996	3.31304	1.99302	1.59616	0.706363	0.494589	1.15738
chr3	112086335	112086485	C3orf52	103	+	37.1516	58.0258	74.044	89.5471	36.7396	38.163	C3orf52	58.9696	1.56187	1.99302	2.41032	0.98891	1.02722	1.58727
chr3	48446703	48446853	ATRIP	463	+	324.232	577.998	644.383	396.395	162.704	133.571	ATRIP	370.403	1.78267	1.98741	1.22257	0.501814	0.411961	1.1424
chr1	47314035	47314185	STIL	71	-	38.2774	55.0115	76.0452	114.62	41.9881	31.8025	STIL	136.367	1.43718	1.98669	2.99446	1.09694	0.830843	3.5626
chrX	23783102	23783252	SAT1	255	+	190.824	299.926	378.892	318.788	183.698	190.815	SAT1	326.176	1.57174	1.98556	1.67059	0.962657	0.999953	1.7093
chr9	19408920	19409070	ACER2	94	+	84.9983	152.224	168.767	130.142	94.4733	57.2446	ACER2	130.839	1.79091	1.98553	1.53111	1.11147	0.673479	1.53931
chr4	143513650	143513800	SMARCA5	235	+	105.263	162.02	208.124	174.318	110.219	110.249	SMARCA5	186.123	1.53919	1.97718	1.65602	1.04708	1.04737	1.76817
chr8	85177842	85177992	E2F5	25	+	5.06613	6.02866	10.006	14.3275	7.87277	6.36051	E2F5	18.428	1.18999	1.97508	2.8281	1.554	1.2555	3.63749
chr4	128811259	128811409	JADE1	161	+	35.4629	47.4757	70.0417	79.9954	76.1035	69.9656	JADE1	125.31	1.33874	1.97507	2.25575	2.146	1.97292	3.53355
chr1	20733022	20733172	SH2D5	63	-	21.9532	52.7508	43.3591	51.3403	34.1153	27.5622	SH2D5	36.856	2.40288	1.97507	2.33862	1.554	1.2555	1.67884
chr2	223837497	223837647	AP1S3	38	-	6.75484	22.6075	13.3413	15.5215	20.9941	27.5622	AP1S3	53.4412	3.34686	1.97507	2.29783	3.10801	4.08036	7.91154
chr2	74554268	74554418	LOXL3	46	-	6.75484	5.27508	13.3413	22.6853	5.24852	38.163	LOXL3	9.214	0.780933	1.97507	3.35838	0.777001	5.64973	1.36406
chr2	238138631	238138781	KLHL30	65	+	1.68871	3.76791	3.33532	32.2369	28.8668	23.3219	KLHL30	79.2404	2.23124	1.97507	19.0897	17.094	13.8105	46.9236
chr14	74923162	74923312	RPS6KL1	20	-	1.68871	1.50716	3.33532	21.4913	36.7396	12.721	RPS6KL1	29.4848	0.892492	1.97507	12.7265	21.756	7.53297	17.46
chr5	41870372	41870522	OXCT1	127	-	61.9193	87.4155	122.073	112.232	89.2248	84.8068	OXCT1	97.6684	1.41176	1.97149	1.81255	1.44099	1.36963	1.57735
chr7	118184078	118184228	LSM8	224	+	116.521	168.802	229.47	230.434	123.34	106.008	LSM8	241.407	1.44868	1.96934	1.97762	1.05852	0.909776	2.07179
chr3	157160072	157160222	CCNL1	1628	-	415.985	924.645	819.154	639.963	453.997	351.948	CCNL1	698.421	2.22278	1.96919	1.53843	1.09138	0.846059	1.67896
chr5	181205086	181205236	TRIM7	106	-	26.4564	21.8539	52.0309	106.263	44.6124	55.1244	TRIM7	95.8256	0.826035	1.96667	4.01653	1.68626	2.08359	3.62202
chr20	25407647	25407797	GINS1	107	+	34.3371	81.3869	67.3734	96.7108	41.9881	40.2832	GINS1	106.882	2.37023	1.96212	2.81651	1.22282	1.17317	3.11273
chr19	11529035	11529185	ECSIT	86	-	48.9726	87.4155	96.0571	122.978	62.9822	57.2446	ECSIT	79.2404	1.78499	1.96145	2.51116	1.28607	1.16891	1.61806
chr15	45634975	45635125	SQOR	113	+	99.0709	197.439	194.115	192.228	73.4792	40.2832	SQOR	93.9828	1.99291	1.95935	1.94031	0.741683	0.40661	0.948642
chr6	11537683	11537833	TMEM170B	100	+	66.4225	91.937	130.077	130.142	139.086	82.6866	TMEM170B	138.21	1.38412	1.95833	1.95931	2.09396	1.24486	2.08077
chr1	6393292	6393442	ACOT7	128	-	38.8403	58.0258	76.0452	95.5169	76.1035	55.1244	ACOT7	105.04	1.49396	1.95789	2.45922	1.9594	1.41926	2.70441
chr1	45583971	45584121	NASP	342	+	122.713	191.41	240.143	198.198	131.213	95.4076	NASP	222.979	1.55982	1.95695	1.61513	1.06927	0.777486	1.81708
chr5	52989284	52989434	ITGA2	53	+	24.2048	42.9542	47.3615	88.3531	55.1094	69.9656	ITGA2	46.07	1.77461	1.9567	3.65023	2.2768	2.89057	1.90334
chr3	66998243	66998393	KBTBD8	80	+	22.5161	47.4757	44.0262	28.6551	18.3698	33.9227	KBTBD8	53.4412	2.10852	1.95532	1.27265	0.815852	1.5066	2.37347
chr2	171160738	171160888	TLK1	101	-	51.2242	61.0402	100.06	121.784	65.6064	53.0042	TLK1	110.568	1.19163	1.95337	2.37747	1.28077	1.03475	2.15851
chr2	64454114	64454264	LGALSL	74	+	34.9	36.172	68.0405	82.3833	44.6124	65.7252	LGALSL	51.5984	1.03645	1.94958	2.36055	1.27829	1.88324	1.47846
chr1	86914263	86914413	SELENOF	83	-	37.7145	51.2436	73.377	46.5645	41.9881	40.2832	SELENOF	79.2404	1.35872	1.94559	1.23466	1.11331	1.06811	2.10106
chr3	64687926	64688076	ADAMTS9	71	-	141.289	239.639	274.83	237.598	76.1035	36.0429	ADAMTS9	117.939	1.69609	1.94516	1.68165	0.538637	0.255101	0.834736
chr8	85107164	85107314	LRRCC1	116	+	73.7403	111.53	143.419	144.469	78.7277	63.6051	LRRCC1	123.468	1.51247	1.94492	1.95916	1.06763	0.862555	1.67436
chrX	134807142	134807292	FAM122C	61	+	54.6016	155.238	106.063	51.3403	34.1153	29.6824	FAM122C	31.3276	2.8431	1.94249	0.940271	0.624804	0.543618	0.573749
chr10	104338372	104338522	ITPRIP	430	-	147.481	343.634	286.17	279.387	167.952	152.652	ITPRIP	257.992	2.33002	1.94039	1.89439	1.1388	1.03506	1.74932
chr1	1000009	1000159	HES4	215	-	164.368	327.808	318.856	427.438	301.79	286.223	HES4	348.289	1.99435	1.93989	2.60049	1.83606	1.74135	2.11896
chr17	58531950	58532100	SEPT4	24	-	12.3839	11.3037	24.0143	27.4611	20.9941	27.5622	SEPT4	14.7424	0.912774	1.93915	2.21748	1.69527	2.22565	1.19045
chr15	59438135	59438285	FAM81A	20	+	6.19193	7.53582	12.0071	40.5947	23.6183	33.9227	FAM81A	47.9128	1.21704	1.93915	6.55607	3.81437	5.47853	7.73794
chr19	36605531	36605681	ZNF382	23	+	6.19193	3.01433	12.0071	31.043	15.7455	12.721	ZNF382	18.428	0.486816	1.93915	5.01346	2.54291	2.05445	2.97613
chr1	214603172	214603322	CENPF	64	+	23.079	38.4327	44.6932	57.3101	36.7396	23.3219	CENPF	68.1836	1.66527	1.93653	2.48321	1.59191	1.01052	2.95436
chr2	25042185	25042335	EFR3B	64	+	33.7742	52.7508	65.3722	72.8316	34.1153	21.2017	EFR3B	57.1268	1.56187	1.93557	2.15643	1.0101	0.627748	1.69143
chr19	50836002	50836152	KLK15	68	-	16.8871	26.3754	32.6861	58.5041	47.2366	50.8841	KLK15	47.9128	1.56187	1.93557	3.46443	2.7972	3.01319	2.83724
chr17	51120781	51120931	SPAG9	399	-	160.99	301.433	311.519	168.348	118.092	116.609	SPAG9	228.507	1.87237	1.93502	1.0457	0.733536	0.724324	1.41939
chr12	48865794	48865944	RND1	515	-	171.122	426.528	330.863	192.228	131.213	91.1673	RND1	178.752	2.49254	1.93349	1.12334	0.76678	0.532762	1.04459
chr8	55879758	55879908	LYN	248	+	107.514	220.8	207.457	220.883	94.4733	82.6866	LYN	210.079	2.05369	1.92958	2.05446	0.878707	0.769078	1.95397
chr21	42513778	42513928	SLC37A1	54	+	43.9064	56.5187	84.7171	70.4437	15.7455	29.6824	SLC37A1	49.7556	1.28725	1.92949	1.60441	0.358615	0.676038	1.13322
chr20	16729957	16730107	SNRPB2	119	+	51.2242	84.4012	98.7254	102.681	76.1035	44.5236	SNRPB2	92.14	1.64768	1.92732	2.00454	1.48569	0.869191	1.79876
chr6	29627934	29628084	GABBR1	163	-	172.811	275.811	332.865	282.969	104.97	72.0858	GABBR1	149.267	1.59603	1.92618	1.63745	0.607427	0.417137	0.863759
chr14	52552795	52552945	GPR137C	147	+	63.0451	112.284	121.406	113.426	83.9762	59.3647	GPR137C	136.367	1.78101	1.9257	1.79912	1.332	0.941623	2.16301
chr11	107858721	107858871	SLC35F2	60	-	13.5097	30.8969	26.0155	53.7282	41.9881	46.6437	SLC35F2	38.6988	2.28702	1.92569	3.97701	3.108	3.45261	2.86452
chr4	151409118	151409268	FAM160A1	49	+	4.50322	2.26075	8.67182	20.2973	20.9941	12.721	FAM160A1	11.0568	0.50203	1.92569	4.50729	4.66202	2.82487	2.45531
chr3	53046595	53046745	SFMBT1	66	-	4.50322	5.27508	8.67182	23.8792	15.7455	23.3219	SFMBT1	33.1704	1.1714	1.92569	5.30269	3.4965	5.17894	7.36593
chr14	54566035	54566185	SAMD4A	384	+	131.719	244.914	253.484	253.12	167.952	154.772	SAMD4A	226.664	1.85937	1.92443	1.92167	1.27508	1.17502	1.72081
chr19	20167141	20167291	ZNF486	150	+	66.9855	101.734	128.743	109.844	65.6064	44.5236	ZNF486	128.996	1.51875	1.92195	1.63982	0.979412	0.664675	1.92573
chr5	176238419	176238569	SIMC1	62	+	28.1451	37.6791	54.0321	38.2067	20.9941	27.5622	SIMC1	58.9696	1.33874	1.91977	1.35749	0.745924	0.979289	2.0952
chr3	20186070	20186220	SGO1	40	-	11.821	24.1146	22.6802	29.849	10.497	8.48068	SGO1	20.2708	2.03998	1.91864	2.52508	0.887996	0.717425	1.71481
chr15	40929269	40929419	DLL4	216	+	123.839	187.642	237.475	182.676	76.1035	72.0858	DLL4	204.551	1.51521	1.91761	1.47511	0.614536	0.582093	1.65175
chr20	31870557	31870707	TTLL9	65	+	7.31774	9.04299	14.0083	25.0732	10.497	12.721	TTLL9	22.1136	1.23576	1.91429	3.42636	1.43446	1.73838	3.02192
chr3	39384364	39384514	SLC25A38	104	+	52.35	80.6333	100.06	72.8316	62.9822	57.2446	SLC25A38	81.0832	1.54027	1.91137	1.39124	1.2031	1.0935	1.54887
chr5	140346528	140346678	HBEGF	393	-	242.611	514.697	463.609	322.369	139.086	163.253	HBEGF	300.376	2.12149	1.91092	1.32875	0.573288	0.6729	1.2381
chr14	22871342	22871492	LRP10	161	+	65.2967	186.888	124.074	75.2195	78.7277	65.7252	LRP10	70.0264	2.86214	1.90016	1.15196	1.20569	1.00656	1.07243
chr15	88895461	88895611	HAPLN3	45	-	38.2774	139.413	72.7099	47.7584	23.6183	44.5236	HAPLN3	33.1704	3.64218	1.89955	1.24769	0.61703	1.16318	0.866579
chr1	229342443	229342593	CCSAP	66	-	52.35	92.6906	99.3925	77.6075	60.3579	50.8841	CCSAP	73.712	1.77059	1.89862	1.48247	1.15297	0.971998	1.40806
chr2	120013001	120013151	EPB41L5	45	+	52.35	50.49	99.3925	93.1289	44.6124	55.1244	EPB41L5	55.284	0.96447	1.89862	1.77897	0.852195	1.053	1.05605
chr3	99876094	99876244	FILIP1L	174	-	141.289	309.722	268.159	191.034	115.467	55.1244	FILIP1L	158.481	2.19212	1.89795	1.35208	0.81724	0.390154	1.12168
chr12	53954812	53954962	HOXC12	53	+	2.81451	3.76791	5.33651	5.9698	5.24852	12.721	HOXC12	7.3712	1.33874	1.89607	2.12108	1.86481	4.51979	2.619
chr1	110674871	110675021	KCNA3	36	-	14.0726	36.9255	26.6825	45.3705	28.8668	10.6008	KCNA3	40.5416	2.62393	1.89606	3.22403	2.05128	0.753294	2.88089
chr14	105168669	105168819	JAG2	45	-	5.62903	3.01433	10.673	7.16377	31.4911	27.5622	JAG2	31.3276	0.535497	1.89606	1.27265	5.59441	4.89644	5.56536
chr8	42541625	42541775	SLC20A2	208	-	100.76	109.269	190.78	306.848	194.195	175.974	SLC20A2	235.878	1.08445	1.89341	3.04534	1.9273	1.74647	2.34099
chr12	111405853	111406003	SH2B3	240	+	138.474	172.57	262.156	284.163	220.438	154.772	SH2B3	385.145	1.24623	1.89318	2.0521	1.59191	1.1177	2.78135
chr5	163460567	163460717	HMMR	65	+	40.529	64.8081	76.7123	79.9954	20.9941	14.8412	HMMR	81.0832	1.59905	1.89278	1.97378	0.518002	0.366187	2.00062
chr6	25962733	25962883	TRIM38	155	+	191.95	566.694	362.883	207.749	99.7218	46.6437	TRIM38	143.738	2.9523	1.89051	1.08231	0.51952	0.242999	0.74883
chr19	53365659	53365809	ZNF525	152	+	50.6613	88.9227	95.3901	120.59	97.0975	55.1244	ZNF525	117.939	1.75524	1.8829	2.38032	1.9166	1.0881	2.32799
chr5	142324939	142325089	SPRY4	202	-	86.1242	173.324	162.096	192.228	125.964	156.893	SPRY4	241.407	2.01249	1.88212	2.23199	1.46259	1.82171	2.80301
chr16	87765880	87766030	KLHDC4	95	-	25.8935	48.9828	48.6956	68.0558	57.7337	48.7639	KLHDC4	53.4412	1.8917	1.88061	2.6283	2.22966	1.88325	2.06388
chr12	56266866	56267016	COQ10A	227	+	136.223	208.742	256.152	176.706	68.2307	78.4463	COQ10A	195.337	1.53236	1.88039	1.29718	0.500875	0.575867	1.43395
chr6	26271334	26271484	HIST1H3G	355	-	225.724	461.192	423.585	299.684	160.08	108.129	HIST1H3G	409.102	2.04317	1.87656	1.32766	0.709185	0.479032	1.8124
chr5	112419827	112419977	EPB41L4A	24	-	6.75484	15.8252	12.6742	8.35773	13.1213	19.0815	EPB41L4A	23.9564	2.34279	1.87631	1.2373	1.9425	2.82486	3.54655
chr2	205682421	205682571	NRP2	148	+	140.163	257.725	262.823	152.827	110.219	55.1244	NRP2	116.096	1.83875	1.87512	1.09035	0.786363	0.393288	0.828293
chr17	39687843	39687993	ERBB2	126	+	30.9597	51.2436	58.0345	58.5041	76.1035	57.2446	ERBB2	73.712	1.65517	1.87452	1.88969	2.45815	1.849	2.3809
chr10	92593083	92593233	KIF11	86	+	34.9	83.6476	65.3722	91.935	57.7337	36.0429	KIF11	130.839	2.39678	1.87313	2.63424	1.65426	1.03275	3.74897
chr1	228458031	228458181	HIST3H2BB	897	+	260.061	406.181	486.956	420.274	304.414	307.425	HIST3H2BB	628.395	1.56187	1.87247	1.61606	1.17055	1.18213	2.41634
chr1	182604313	182604463	RGS16	87	-	49.5355	122.834	92.7218	99.0988	60.3579	65.7252	RGS16	112.411	2.47972	1.87183	2.00056	1.21848	1.32683	2.2693
chr5	127030481	127030631	MARCH3	184	-	119.335	197.439	222.799	185.064	99.7218	86.9269	MARCH3	222.979	1.65449	1.867	1.55079	0.835646	0.728428	1.86851
chr1	169794995	169795145	C1orf112	48	+	26.4564	36.9255	49.3627	69.2497	18.3698	33.9227	C1orf112	47.9128	1.39571	1.86581	2.6175	0.694342	1.28221	1.81101
chrX	53422585	53422735	SMC1A	160	-	80.4951	118.312	150.089	88.3531	65.6064	48.7639	SMC1A	134.524	1.4698	1.86457	1.09762	0.815036	0.6058	1.67121
chr10	8054593	8054743	GATA3	40	+	3.94032	9.79657	7.3377	5.9698	5.24852	29.6824	GATA3	7.3712	2.48624	1.86221	1.51505	1.332	7.53299	1.87071
chr4	139302404	139302554	NDUFC1	134	-	48.4097	149.963	90.0536	81.1893	65.6064	44.5236	NDUFC1	82.926	3.09779	1.86024	1.67713	1.35523	0.919725	1.713
chr15	78264485	78264635	DNAJA4	148	+	24.7677	35.4184	46.0274	44.1766	47.2366	93.2874	DNAJA4	81.0832	1.43002	1.85836	1.78364	1.90719	3.76649	3.27375
chr3	134795188	134795338	EPHB1	91	+	33.7742	52.7508	62.704	39.4007	44.6124	44.5236	EPHB1	31.3276	1.56187	1.85657	1.16659	1.3209	1.31827	0.92756
chr9	91423760	91423910	NFIL3	485	-	265.127	370.762	491.626	360.576	309.662	281.983	NFIL3	313.276	1.39843	1.8543	1.36001	1.16798	1.06358	1.18161
chr3	122794070	122794220	HSPBAP1	121	-	21.9532	58.7794	40.6909	63.2799	52.4852	59.3647	HSPBAP1	73.712	2.67749	1.85353	2.88249	2.39078	2.70415	3.35769
chr3	38649611	38649761	SCN5A	133	-	64.1709	79.1261	118.737	161.185	83.9762	82.6866	SCN5A	169.538	1.23305	1.85032	2.51181	1.30863	1.28854	2.64198
chr2	70087044	70087194	PCBP1	546	+	157.613	227.582	291.507	274.611	133.837	154.772	PCBP1	289.32	1.44393	1.84951	1.74231	0.849149	0.981975	1.83564
chr19	13152981	13153131	IER2	902	+	330.424	553.883	611.03	556.386	377.893	354.068	IER2	613.652	1.67628	1.84923	1.68385	1.14366	1.07156	1.85717
chr3	134029856	134030006	SLCO2A1	51	-	28.1451	58.7794	52.0309	9.55169	18.3698	12.721	SLCO2A1	25.7992	2.08844	1.84867	0.339373	0.652682	0.451979	0.91665
chr3	196639685	196639835	NRROS	63	+	14.0726	37.6791	26.0155	57.3101	26.2426	38.163	NRROS	64.498	2.67748	1.84866	4.07246	1.8648	2.71187	4.58323
chr8	23682857	23683007	NKX3-1	97	-	90.6274	161.267	167.433	161.185	70.855	72.0858	NKX3-1	119.782	1.77945	1.84749	1.77855	0.781828	0.795408	1.3217
chr18	59139820	59139970	SEC11C	177	+	44.4693	55.0115	82.0488	128.948	78.7277	67.8454	SEC11C	184.28	1.23707	1.84507	2.89971	1.77038	1.52567	4.14398
chr16	4416514	4416664	CORO7	168	-	74.8661	107.009	138.082	150.439	89.2248	76.3261	CORO7	165.852	1.42934	1.84439	2.00944	1.19179	1.0195	2.21532
chr16	4416514	4416664	CORO7-PAM16	168	-	74.8661	107.009	138.082	150.439	89.2248	76.3261	CORO7-PAM16	165.852	1.42934	1.84439	2.00944	1.19179	1.0195	2.21532
chr2	109129124	109129274	SH3RF3	23	+	5.06613	9.79657	9.33889	14.3275	5.24852	14.8412	SH3RF3	20.2708	1.93374	1.8434	2.8281	1.036	2.92949	4.00124
chr16	81006765	81006915	CMC2	106	-	94.5677	138.659	174.104	136.112	73.4792	72.0858	CMC2	112.411	1.46624	1.84105	1.43931	0.777001	0.762267	1.18868
chr17	82333680	82333830	SECTM1	48	-	79.3693	236.625	146.087	56.1162	36.7396	23.3219	SECTM1	62.6552	2.98132	1.8406	0.707027	0.462894	0.29384	0.789414
chr4	185535418	185535568	PDLIM3	42	-	21.3903	22.6075	39.3567	41.7886	18.3698	29.6824	PDLIM3	9.214	1.0569	1.83993	1.95362	0.858791	1.38766	0.430756
chr1	247007969	247008119	ZNF695	37	-	21.3903	30.1433	39.3567	60.892	31.4911	12.721	ZNF695	57.1268	1.4092	1.83993	2.84671	1.47221	0.594709	2.67069
chr15	84980637	84980787	PDE8A	74	+	27.5822	30.1433	50.6968	35.8188	41.9881	36.0429	PDE8A	49.7556	1.09285	1.83803	1.29862	1.52229	1.30674	1.8039
chr6	138161892	138162042	ARFGEF3	52	+	11.2581	14.3181	20.679	45.3705	47.2366	42.4034	ARFGEF3	31.3276	1.2718	1.83681	4.03003	4.19579	3.76648	2.78267
chr17	7916212	7916362	RNF227	82	-	51.2242	66.3152	94.0559	87.1591	52.4852	36.0429	RNF227	64.498	1.29461	1.83616	1.70152	1.02462	0.70363	1.25913
chr15	74956696	74956846	RPP25	688	-	215.592	291.636	394.902	446.541	372.645	349.828	RPP25	510.456	1.35272	1.83171	2.07123	1.72847	1.62264	2.36769
chr5	43397007	43397157	CCL28	26	-	6.19193	12.8109	11.3401	27.4611	23.6183	14.8412	CCL28	23.9564	2.06897	1.83143	4.43498	3.81437	2.39686	3.86897
chr12	56521734	56521884	RBMS2	46	+	6.19193	4.52149	11.3401	10.7456	23.6183	14.8412	RBMS2	38.6988	0.730223	1.83143	1.73542	3.81437	2.39686	6.24988
chr9	33264975	33265125	CHMP5	627	+	201.519	486.814	368.886	291.326	207.316	180.214	CHMP5	287.477	2.41572	1.83053	1.44565	1.02877	0.894278	1.42655
chr2	218672005	218672155	STK36	85	+	52.9129	88.9227	96.7242	100.293	52.4852	29.6824	STK36	86.6116	1.68055	1.82799	1.89544	0.991917	0.560967	1.63687
chr6	11232587	11232737	NEDD9	105	-	149.732	334.591	273.496	155.215	57.7337	33.9227	NEDD9	116.096	2.2346	1.82657	1.03662	0.38558	0.226556	0.775359
chr18	9614773	9614923	PPP4R1	32	-	14.6355	24.1146	26.6825	32.2369	28.8668	27.5622	PPP4R1	23.9564	1.64768	1.82314	2.20265	1.97238	1.88324	1.63687
chr19	2611176	2611326	GNG7	42	-	7.31774	18.086	13.3413	11.9396	0	4.24034	GNG7	16.5852	2.47153	1.82314	1.6316	0	0.57946	2.26644
chr19	33064811	33064961	RHPN2	111	-	81.6209	121.327	148.755	127.754	68.2307	76.3261	RHPN2	128.996	1.48647	1.82251	1.56521	0.835946	0.935129	1.58043
chr4	140756848	140756998	TBC1D9	66	-	31.5226	56.5187	57.3675	75.2195	52.4852	29.6824	TBC1D9	97.6684	1.79296	1.81988	2.38621	1.665	0.941623	3.09836
chr19	18557808	18557958	KXD1	207	+	87.25	117.559	158.761	142.081	94.4733	95.4076	KXD1	138.21	1.34738	1.81961	1.62844	1.08279	1.0935	1.58407
chr19	52690410	52690560	ZNF83	368	-	95.6935	173.324	174.104	212.525	141.71	131.45	ZNF83	221.136	1.81124	1.81939	2.22089	1.48087	1.37366	2.31088
chr2	176092610	176092760	HOXD13	34	+	8.44354	9.04299	15.3425	29.849	15.7455	14.8412	HOXD13	22.1136	1.071	1.81707	3.53513	1.8648	1.7577	2.619
chr1	110963851	110964001	LRIF1	477	-	179.003	273.55	324.86	299.684	241.432	212.017	LRIF1	372.246	1.52819	1.81483	1.67418	1.34876	1.18443	2.07955
chr17	80476520	80476670	NPTX1	24	-	18.0129	18.8396	32.6861	23.8792	15.7455	27.5622	NPTX1	22.1136	1.04589	1.81459	1.32567	0.874124	1.53014	1.22765
chr8	143541331	143541481	ZC3H3	187	-	189.698	311.229	344.205	271.029	160.08	91.1673	ZC3H3	230.35	1.64066	1.81449	1.42874	0.843868	0.480592	1.2143
chr3	146161090	146161240	PLOD2	115	-	92.3161	143.181	167.433	202.973	97.0975	72.0858	PLOD2	112.411	1.55099	1.81369	2.19867	1.05179	0.780858	1.21767
chr9	35732296	35732446	TLN1	693	-	260.061	432.556	471.614	354.606	251.929	137.811	TLN1	377.774	1.66329	1.81347	1.36355	0.96873	0.529918	1.45264
chr2	27050642	27050792	AGBL5	101	+	327.047	529.768	593.019	777.269	965.727	714.497	AGBL5	528.884	1.61985	1.81325	2.37663	2.95287	2.18469	1.61715
chr1	91501052	91501202	CDC7	256	+	103.011	228.335	186.778	253.12	149.583	116.609	CDC7	267.206	2.21661	1.81318	2.45721	1.45211	1.13201	2.59396
chr1	149850990	149851140	HIST2H2AA4	3931	+	1134.25	2458.94	2056.56	1426.78	1062.82	786.583	HIST2H2AA4	1559.01	2.1679	1.81315	1.25791	0.937024	0.693483	1.37449
chr7	30478675	30478825	NOD1	59	-	63.0451	128.109	114.068	134.918	73.4792	61.4849	NOD1	99.5112	2.03202	1.80931	2.14002	1.1655	0.975253	1.57841
chr3	57556239	57556389	PDE12	373	+	155.361	239.639	280.834	282.969	183.698	169.614	PDE12	283.791	1.54247	1.80762	1.82136	1.18239	1.09174	1.82666
chrX	155026908	155027058	FUNDC2	47	+	22.5161	29.3897	40.6909	34.6249	23.6183	6.36051	FUNDC2	29.4848	1.30527	1.80719	1.53778	1.04895	0.282487	1.3095
chr22	38705878	38706028	GTPBP1	503	+	261.75	629.241	472.948	464.451	278.171	207.777	GTPBP1	514.141	2.40398	1.80687	1.77441	1.06274	0.793799	1.96424
chr12	3873034	3873184	PARP11	351	-	137.348	274.304	248.148	212.525	123.34	76.3261	PARP11	215.608	1.99715	1.80671	1.54735	0.898011	0.555713	1.56979
chr11	125625891	125626041	CHEK1	42	+	11.821	24.1146	21.346	44.1766	34.1153	25.442	CHEK1	33.1704	2.03998	1.80577	3.73713	2.88599	2.15227	2.80606
chr1	44031374	44031524	SLC6A9	72	-	36.5887	82.8941	66.0393	39.4007	49.8609	25.442	SLC6A9	71.8692	2.26557	1.80491	1.07685	1.36274	0.695351	1.96425
chr8	544759	544909	TDRP	684	-	314.663	465.714	567.671	476.39	304.414	226.858	TDRP	414.63	1.48004	1.80406	1.51397	0.967429	0.720955	1.3177
chr16	46689611	46689761	ORC6	114	+	55.1645	93.4442	99.3925	175.512	86.6005	44.5236	ORC6	140.053	1.69392	1.80175	3.18161	1.56986	0.807106	2.53882
chr9	97412064	97412214	TDRD7	53	+	42.2177	125.095	76.0452	112.232	73.4792	44.5236	TDRD7	68.1836	2.96309	1.80126	2.65841	1.74048	1.05462	1.61505
chr1	212608695	212608845	ATF3	213	+	221.221	446.874	398.237	447.735	391.014	400.712	ATF3	466.228	2.02003	1.80018	2.02393	1.76753	1.81137	2.10752
chr1	9651676	9651826	PIK3CD	101	+	108.077	154.484	194.115	205.361	104.97	63.6051	PIK3CD	128.996	1.42939	1.79608	1.90014	0.971252	0.588517	1.19356
chr8	42271252	42271402	IKBKB	120	+	59.1048	88.9227	106.063	89.5471	55.1094	48.7639	IKBKB	77.3976	1.50449	1.79449	1.51506	0.932401	0.825041	1.3095
chr1	9539414	9539564	SLC25A33	1539	+	905.148	1384.33	1623.63	1490.06	928.987	703.896	SLC25A33	1536.9	1.5294	1.79377	1.64621	1.02634	0.777658	1.69795
chr15	63121778	63121928	LACTB	209	+	108.64	188.396	194.783	176.706	110.219	72.0858	LACTB	189.808	1.73413	1.79292	1.62653	1.01453	0.663529	1.74713
chr18	2655652	2655802	SMCHD1	132	+	87.8129	134.138	157.427	180.288	152.207	91.1673	SMCHD1	145.581	1.52754	1.79275	2.05309	1.73331	1.0382	1.65785
chr12	69738817	69738967	RAB3IP	63	+	21.9532	35.4184	39.3567	50.1464	57.7337	40.2832	RAB3IP	51.5984	1.61336	1.79275	2.28424	2.62985	1.83496	2.35038
chr19	47514947	47515097	NAPA	480	-	246.551	496.611	441.596	359.382	230.935	182.335	NAPA	418.316	2.01423	1.79109	1.45764	0.936662	0.739543	1.69667
chr11	47715291	47715441	AGBL2	86	-	133.408	259.232	238.809	206.555	78.7277	63.6051	AGBL2	116.096	1.94315	1.79007	1.5483	0.590127	0.476771	0.870233
chr18	3448372	3448522	TGIF1	463	+	133.408	274.304	238.809	250.732	125.964	131.45	TGIF1	243.25	2.05613	1.79007	1.87944	0.944201	0.985323	1.82335
chr8	142614401	142614551	ARC	248	-	291.584	576.49	521.644	278.193	99.7218	116.609	ARC	246.935	1.9771	1.789	0.954075	0.342	0.399916	0.846874
chr22	35400079	35400229	MCM5	150	+	29.8339	20.3467	53.3651	59.698	78.7277	57.2446	MCM5	112.411	0.681999	1.78874	2.00101	2.63887	1.91878	3.76789
chr13	31161837	31161987	HSPH1	740	-	313.537	391.109	560.333	464.451	278.171	383.751	HSPH1	550.997	1.24741	1.78714	1.48133	0.887203	1.22394	1.75736
chr2	110677973	110678123	BUB1	57	-	46.7209	103.994	83.3829	109.844	31.4911	10.6008	BUB1	79.2404	2.22586	1.7847	2.35107	0.674026	0.226896	1.69604
chr1	185317169	185317319	IVNS1ABP	1157	-	338.868	562.926	603.025	476.39	335.905	258.661	IVNS1ABP	449.643	1.6612	1.77953	1.40583	0.991256	0.763309	1.3269
chr16	85613227	85613377	GSE1	52	+	5.62903	7.53582	10.006	15.5215	18.3698	19.0815	GSE1	31.3276	1.33874	1.77757	2.7574	3.2634	3.38984	5.56536
chr1	89022761	89022911	GBP3	31	-	41.6548	270.536	74.044	34.6249	18.3698	10.6008	GBP3	27.642	6.49471	1.77756	0.831234	0.441001	0.254492	0.663597
chr10	97401216	97401366	RRP12	180	-	39.4032	59.533	70.0417	94.3229	89.2248	65.7252	RRP12	81.0832	1.51087	1.77756	2.39379	2.2644	1.66802	2.05778
chr14	20684150	20684300	ANG	38	+	22.5161	40.6934	40.0238	16.7155	18.3698	14.8412	ANG	57.1268	1.8073	1.77756	0.74238	0.815852	0.659137	2.53715
chr16	74701062	74701212	MLKL	44	-	22.5161	82.1405	40.0238	40.5947	26.2426	12.721	MLKL	18.428	3.64808	1.77756	1.80292	1.1655	0.564974	0.818437
chr14	20684150	20684300	RNASE4	38	+	22.5161	40.6934	40.0238	16.7155	18.3698	14.8412	RNASE4	57.1268	1.8073	1.77756	0.74238	0.815852	0.659137	2.53715
chr10	115093316	115093466	ATRNL1	46	+	15.7613	14.3181	28.0167	37.0128	41.9881	23.3219	ATRNL1	47.9128	0.908434	1.77756	2.34833	2.664	1.47969	3.0399
chr9	130939121	130939271	FIBCD1	26	-	4.50322	8.28941	8.00476	26.2671	7.87277	10.6008	FIBCD1	42.3844	1.84077	1.77756	5.83296	1.74825	2.35405	9.41202
chr8	17801072	17801222	MTUS1	39	-	4.50322	7.53582	8.00476	14.3275	15.7455	27.5622	MTUS1	18.428	1.67343	1.77756	3.18161	3.4965	6.12055	4.09218
chr17	31488041	31488191	RAB11FIP4	45	+	4.50322	11.3037	8.00476	7.16377	28.8668	10.6008	RAB11FIP4	18.428	2.51014	1.77756	1.59081	6.41026	2.35405	4.09218
chr15	82262012	82262162	SAXO2	30	+	4.50322	4.52149	8.00476	11.9396	2.62426	14.8412	SAXO2	7.3712	1.00406	1.77756	2.65135	0.582752	3.29569	1.63687
chr17	12665823	12665973	MYOCD	36	+	2.25161	0.753582	4.00238	3.58188	13.1213	19.0815	MYOCD	5.5284	0.334686	1.77756	1.59081	5.82752	8.4746	2.45531
chr1	154502782	154502932	SHE	111	-	2.25161	1.50716	4.00238	13.1336	26.2426	59.3647	SHE	9.214	0.66937	1.77756	5.83298	11.655	26.3654	4.09218
chr18	5896056	5896206	TMEM200C	21	-	2.25161	6.78224	4.00238	7.16377	5.24852	4.24034	TMEM200C	14.7424	3.01217	1.77756	3.18162	2.33101	1.88325	6.54749
chr8	123541136	123541286	FBXO32	524	-	242.048	406.934	428.922	229.24	199.444	163.253	FBXO32	386.988	1.68121	1.77205	0.947085	0.823985	0.674465	1.59881
chr7	140062851	140063001	PARP12	121	-	72.0516	242.653	127.409	120.59	115.467	78.4463	PARP12	105.04	3.36777	1.7683	1.67366	1.60256	1.08875	1.45784
chr15	88467309	88467459	MRPL46	165	-	60.7935	104.748	107.397	121.784	115.467	46.6437	MRPL46	92.14	1.72301	1.76659	2.00324	1.89933	0.767248	1.51562
chr2	111120844	111120994	BCL2L11	520	+	251.055	452.903	442.93	306.848	230.935	252.3	BCL2L11	351.975	1.804	1.76427	1.22223	0.919858	1.00496	1.40198
chr1	213987882	213988032	PROX1	93	+	71.4887	164.281	126.075	120.59	57.7337	50.8841	PROX1	138.21	2.298	1.76357	1.68684	0.807592	0.711778	1.93331
chrY	12904792	12904942	DDX3Y	214	+	93.4419	158.252	164.765	169.542	118.092	99.648	DDX3Y	187.966	1.69359	1.76329	1.81441	1.2638	1.06642	2.01158
chr9	98807597	98807747	GALNT12	38	+	45.0322	53.5043	79.3805	95.5169	52.4852	23.3219	GALNT12	44.2272	1.18813	1.76275	2.12108	1.1655	0.517894	0.982124
chr5	139395028	139395178	PROB1	166	-	45.0322	65.5617	79.3805	89.5471	47.2366	44.5236	PROB1	116.096	1.45588	1.76275	1.98851	1.04895	0.988706	2.57807
chr20	33686290	33686440	E2F1	85	-	20.8274	36.9255	36.6885	82.3833	39.3639	48.7639	E2F1	132.682	1.77293	1.76155	3.95552	1.89001	2.34133	6.37055
chr5	65563041	65563191	CENPK	41	-	19.7016	34.6648	34.6873	48.9524	31.4911	27.5622	CENPK	82.926	1.75949	1.76063	2.48469	1.5984	1.39898	4.2091
chr16	89490891	89491041	SPG7	296	+	133.408	208.742	234.806	157.603	128.589	80.5664	SPG7	224.822	1.56469	1.76006	1.18136	0.963878	0.60391	1.68522
chr1	45491069	45491219	TESK2	123	-	112.581	238.886	198.118	127.754	104.97	55.1244	TESK2	119.782	2.1219	1.75978	1.13477	0.932395	0.489642	1.06396
chr11	63614355	63614505	PLAAT3	101	-	18.5758	36.9255	32.6861	41.7886	34.1153	36.0429	PLAAT3	49.7556	1.98783	1.75961	2.24963	1.83655	1.94031	2.67852
chr2	214809583	214809733	BARD1	62	-	34.9	56.5187	61.3698	82.3833	26.2426	48.7639	BARD1	108.725	1.61945	1.75845	2.36055	0.751937	1.39725	3.11533
chr16	23835909	23836059	PRKCB	25	+	17.45	31.6505	30.6849	21.4913	20.9941	21.2017	PRKCB	55.284	1.81378	1.75845	1.23159	1.2031	1.215	3.16814
chr13	110307082	110307232	COL4A1	395	-	207.148	356.444	364.217	339.085	157.455	159.013	COL4A1	355.66	1.72072	1.75825	1.63692	0.760109	0.76763	1.71694
chr2	191014082	191014232	STAT1	349	-	413.171	1132.63	726.432	740.256	367.396	294.704	STAT1	562.054	2.74131	1.75819	1.79165	0.889211	0.713274	1.36034
chrX	78104174	78104324	PGK1	245	+	135.097	170.31	237.475	223.271	139.086	95.4076	PGK1	180.594	1.26065	1.75781	1.65267	1.02953	0.706216	1.33677
chr7	82443691	82443841	CACNA2D1	64	-	46.7209	75.3582	82.0488	85.9652	44.6124	33.9227	CACNA2D1	68.1836	1.61294	1.75615	1.83997	0.95487	0.726071	1.45938
chr1	45206294	45206444	ZSWIM5	73	-	29.271	46.7221	51.3639	48.9524	23.6183	33.9227	ZSWIM5	49.7556	1.59619	1.75477	1.67239	0.806884	1.15892	1.69983
chr1	149842672	149842822	HIST2H2AA3	3704	-	1067.83	2282.6	1873.78	1272.76	952.606	739.939	HIST2H2AA3	1393.16	2.13761	1.75475	1.19191	0.892095	0.692937	1.30466
chr3	10026384	10026534	FANCD2	29	+	14.0726	26.3754	24.6813	38.2067	15.7455	6.36051	FANCD2	22.1136	1.87424	1.75386	2.71497	1.11888	0.451978	1.57139
chr13	32315873	32316023	BRCA2	143	+	39.9661	124.341	70.0417	74.0256	55.1094	50.8841	BRCA2	101.354	3.11116	1.75253	1.85221	1.3789	1.27318	2.536
chr19	40425917	40426067	SERTAD1	2036	-	1770.89	3617.2	3102.51	1472.15	535.349	510.961	SERTAD1	960.099	2.04259	1.75195	0.831305	0.302305	0.288533	0.542156
chr12	94148607	94148757	PLXNC1	19	+	62.4822	64.8081	109.398	53.7282	13.1213	12.721	PLXNC1	44.2272	1.03723	1.75087	0.859896	0.210001	0.203594	0.707837
chr16	1333570	1333720	BAIAP3	56	+	23.6419	33.1576	41.3579	51.3403	57.7337	25.442	BAIAP3	57.1268	1.40249	1.74935	2.17158	2.44201	1.07614	2.41634
chr14	50668225	50668375	SAV1	616	-	255.558	486.814	446.932	303.266	178.45	148.412	SAV1	304.062	1.90491	1.74885	1.18668	0.698276	0.580737	1.1898
chr3	69013552	69013702	EOGT	100	-	37.1516	57.2723	64.7052	87.1591	65.6064	63.6051	EOGT	138.21	1.54158	1.74165	2.34604	1.76591	1.71204	3.72016
chr9	135478988	135479138	PPP1R26	43	+	27.5822	54.2579	48.0286	31.043	23.6183	8.48068	PPP1R26	20.2708	1.96713	1.74129	1.12547	0.856288	0.307469	0.734923
chr1	63523123	63523273	ITGB3BP	76	-	26.4564	59.533	46.0274	56.1162	28.8668	27.5622	ITGB3BP	58.9696	2.25023	1.73975	2.12108	1.09111	1.0418	2.22894
chr13	73058930	73059080	KLF5	988	+	294.961	600.605	512.972	407.141	244.056	279.862	KLF5	495.713	2.03622	1.73912	1.38032	0.827418	0.94881	1.68061
chr14	74302865	74303015	ABCD4	606	-	233.605	324.794	406.242	434.602	280.796	218.377	ABCD4	409.102	1.39036	1.73901	1.86041	1.20201	0.934813	1.75126
chr1	40665600	40665750	RIMS3	27	-	8.44354	12.8109	14.6754	31.043	18.3698	21.2017	RIMS3	29.4848	1.51724	1.73806	3.67654	2.1756	2.511	3.492
chrX	135520577	135520727	INTS6L	307	+	223.472	395.631	388.231	281.775	162.704	114.489	INTS6L	304.062	1.77038	1.73727	1.2609	0.728073	0.512319	1.36063
chr8	406885	407035	FBXO25	269	+	56.8532	88.1691	98.7254	90.741	83.9762	76.3261	FBXO25	110.568	1.55082	1.7365	1.59606	1.47707	1.34251	1.9448
chr8	42842976	42843126	THAP1	68	-	24.2048	48.9828	42.025	39.4007	13.1213	19.0815	THAP1	36.856	2.02368	1.73623	1.62781	0.542095	0.788335	1.52267
chr1	9129037	9129187	GPR157	219	-	117.647	88.1691	204.121	267.447	170.577	99.648	GPR157	215.608	0.749438	1.73503	2.2733	1.44991	0.847008	1.83267
chr19	29811930	29812080	CCNE1	144	+	45.0322	55.7651	78.0464	115.814	107.595	86.9269	CCNE1	217.45	1.23834	1.73312	2.5718	2.38929	1.93033	4.82877
chr12	21501514	21501664	RECQL	160	-	99.0709	145.441	171.435	198.198	99.7218	97.5278	RECQL	221.136	1.46805	1.73043	2.00057	1.00657	0.984424	2.2321
chr12	39443045	39443195	KIF21A	110	-	28.1451	45.2149	48.6956	63.2799	57.7337	59.3647	KIF21A	66.3408	1.60649	1.73016	2.24835	2.05129	2.10924	2.3571
chr3	141876570	141876720	ATP1B3	606	+	284.266	430.295	491.626	464.451	291.293	267.141	ATP1B3	567.582	1.51371	1.72946	1.63386	1.02472	0.939757	1.99666
chr2	238239959	238240109	HES6	344	-	117.647	139.413	203.454	286.551	259.802	288.343	HES6	305.905	1.18501	1.72936	2.43568	2.20832	2.45092	2.60019
chr2	231464408	231464558	NCL	1369	-	433.998	779.958	749.779	576.683	351.651	290.463	NCL	635.766	1.79715	1.72761	1.32877	0.810259	0.669273	1.46491
chr1	31239820	31239970	NKAIN1	43	-	19.7016	22.6075	34.0202	45.3705	5.24852	12.721	NKAIN1	42.3844	1.1475	1.72677	2.30288	0.266401	0.645684	2.15132
chrX	151974602	151974752	GABRE	353	-	324.795	420.499	560.333	490.718	207.316	159.013	GABRE	331.704	1.29466	1.72519	1.51085	0.638298	0.48958	1.02127
chr18	46173997	46174147	C18orf25	128	+	133.408	224.568	230.137	163.573	78.7277	57.2446	C18orf25	140.053	1.68332	1.72506	1.22611	0.590127	0.429094	1.04981
chr19	43827305	43827455	ZNF283	102	+	37.1516	88.9227	64.0381	65.6678	62.9822	36.0429	ZNF283	58.9696	2.39351	1.7237	1.76756	1.69528	0.970157	1.58727
chr1	109740238	109740388	GSTM3	148	-	108.077	136.398	186.111	200.585	160.08	95.4076	GSTM3	230.35	1.26204	1.72202	1.85595	1.48117	0.882774	2.13135
chr17	13601835	13601985	HS3ST3A1	134	-	59.6677	77.619	102.728	133.724	73.4792	69.9656	HS3ST3A1	99.5112	1.30085	1.72167	2.24115	1.23147	1.17259	1.66776
chr13	60163837	60163987	DIAPH3	28	-	17.45	27.8825	30.0179	27.4611	20.9941	4.24034	DIAPH3	23.9564	1.59785	1.72022	1.5737	1.2031	0.242999	1.37286
chr14	69398211	69398361	ERH	298	-	130.031	181.613	223.466	185.064	107.595	97.5278	ERH	234.036	1.39669	1.71856	1.42323	0.827457	0.750035	1.79985
chr9	137200664	137200814	TPRN	702	-	428.932	617.184	737.105	511.015	346.402	301.064	TPRN	619.181	1.43889	1.71847	1.19137	0.807592	0.701892	1.44354
chr1	151347173	151347323	RFX5	20	-	11.2581	29.3897	19.3448	26.2671	18.3698	16.9614	RFX5	18.428	2.61054	1.7183	2.33317	1.6317	1.5066	1.63687
chr1	25430264	25430414	MACO1	285	+	105.263	141.673	180.774	155.215	104.97	106.008	MACO1	130.839	1.3459	1.71736	1.47454	0.997216	1.00708	1.24297
chr17	81832906	81833056	MCRIP1	197	-	27.5822	24.8682	47.3615	96.7108	118.092	133.571	MCRIP1	119.782	0.901603	1.7171	3.50628	4.28146	4.84265	4.34273
chr1	154608093	154608243	ADAR	79	-	87.8129	229.843	150.756	105.069	39.3639	31.8025	ADAR	62.6552	2.61742	1.71679	1.19651	0.44827	0.362162	0.713508
chr10	62816287	62816437	EGR2	64	-	43.9064	71.5903	75.3782	46.5645	23.6183	23.3219	EGR2	44.2272	1.63052	1.71679	1.06054	0.537924	0.531173	1.00731
chr19	14136508	14136658	ASF1B	103	-	46.7209	60.2866	80.0476	96.7108	57.7337	55.1244	ASF1B	127.153	1.29036	1.71331	2.06997	1.23571	1.17987	2.72154
chr16	56191304	56191454	GNAO1	23	+	5.06613	4.52149	8.67182	11.9396	13.1213	16.9614	GNAO1	20.2708	0.892494	1.71172	2.35675	2.59	3.348	4.00124
chr2	219253836	219253986	TUBA4A	136	-	59.6677	70.8367	102.061	131.336	89.2248	63.6051	TUBA4A	145.581	1.18719	1.71049	2.20112	1.49536	1.06599	2.43986
chr8	81280465	81280615	FABP5	51	+	34.3371	65.5617	58.7016	64.4739	26.2426	25.442	FABP5	57.1268	1.90935	1.70957	1.87767	0.764264	0.740948	1.6637
chr16	11742669	11742819	TXNDC11	451	-	279.2	445.367	476.95	425.05	191.571	222.618	TXNDC11	479.128	1.59515	1.70827	1.52239	0.686143	0.797342	1.71607
chr3	61251357	61251507	FHIT	93	-	38.2774	48.9828	65.3722	76.4135	60.3579	38.163	FHIT	73.712	1.27968	1.70785	1.99631	1.57685	0.997011	1.92573
chr1	46247687	46247837	RAD54L	26	+	14.0726	22.6075	24.0143	44.1766	23.6183	19.0815	RAD54L	35.0132	1.60649	1.70646	3.13919	1.67832	1.35593	2.48804
chr4	67701060	67701210	UBA6	144	-	65.2967	85.1548	111.4	105.069	83.9762	55.1244	UBA6	97.6684	1.30412	1.70606	1.6091	1.28607	0.844214	1.49576
chr15	41972476	41972626	EHD4	246	-	169.434	422.76	288.838	262.671	154.831	142.051	EHD4	219.293	2.49513	1.70472	1.55029	0.913813	0.838385	1.29427
chr21	41879220	41879370	PRDM15	109	-	41.0919	66.3152	70.0417	111.038	49.8609	55.1244	PRDM15	147.424	1.61383	1.70451	2.70219	1.2134	1.34149	3.58767
chr9	97013533	97013683	MFSD14C	132	-	59.1048	71.5903	100.727	107.456	65.6064	42.4034	MFSD14C	86.6116	1.21124	1.70421	1.81806	1.11	0.717427	1.46539
chr21	42010273	42010423	ZBTB21	318	-	68.1113	86.662	116.069	137.306	123.34	120.85	ZBTB21	189.808	1.27236	1.70411	2.01591	1.81086	1.7743	2.78673
chr10	102918261	102918411	CNNM2	101	+	39.9661	88.1691	68.0405	68.0558	36.7396	23.3219	CNNM2	68.1836	2.2061	1.70246	1.70284	0.919269	0.583542	1.70604
chr12	43758912	43759062	IRAK4	178	+	144.666	238.886	246.146	257.896	115.467	110.249	IRAK4	222.979	1.65129	1.70148	1.7827	0.798163	0.762093	1.54134
chr5	121961935	121962085	SRFBP1	179	+	56.8532	100.98	96.7242	143.275	83.9762	67.8454	SRFBP1	176.909	1.77615	1.7013	2.52009	1.47707	1.19334	3.11168
chr10	3067474	3067624	PFKP	85	+	47.8468	63.3009	81.3817	87.1591	70.855	67.8454	PFKP	90.2972	1.32299	1.70088	1.82163	1.48087	1.41797	1.88722
chr4	110623022	110623172	PITX2	66	-	38.8403	71.5903	66.0393	65.6678	26.2426	16.9614	PITX2	71.8692	1.8432	1.70028	1.69071	0.675654	0.436696	1.85038
chr6	106629514	106629664	QRSL1	129	+	38.8403	69.3296	66.0393	76.4135	41.9881	42.4034	QRSL1	84.7688	1.78499	1.70028	1.96738	1.08104	1.09174	2.1825
chr22	23767865	23768015	CHCHD10	127	-	20.8274	18.8396	35.3544	89.5471	91.849	50.8841	CHCHD10	145.581	0.904558	1.69749	4.29949	4.41001	2.44313	6.98988
chr11	68004003	68004153	UNC93B1	156	-	131.719	279.579	223.466	162.379	99.7218	76.3261	UNC93B1	149.267	2.12254	1.69654	1.23277	0.75708	0.579462	1.13322
chr2	26786019	26786169	CENPA	44	+	35.4629	54.2579	60.0357	78.8014	41.9881	38.163	CENPA	58.9696	1.52999	1.69292	2.22208	1.184	1.07614	1.66285
chr8	63038707	63038857	GGH	99	-	31.5226	69.3296	53.3651	69.2497	26.2426	29.6824	GGH	90.2972	2.19936	1.69292	2.19683	0.832501	0.941623	2.86452
chr9	135501154	135501304	C9orf116	56	-	23.6419	36.172	40.0238	53.7282	34.1153	38.163	C9orf116	66.3408	1.53	1.69292	2.27258	1.443	1.61421	2.80607
chr11	10450613	10450763	AMPD3	36	+	3.94032	5.27508	6.67063	11.9396	31.4911	8.48068	AMPD3	18.428	1.33874	1.69292	3.03011	7.99202	2.15228	4.67678
chr2	120346079	120346229	INHBB	29	+	3.94032	2.26075	6.67063	16.7155	5.24852	23.3219	INHBB	14.7424	0.573748	1.69292	4.24217	1.332	5.91878	3.74142
chr8	17497020	17497170	SLC7A2	35	+	15.7613	21.8539	26.6825	31.043	31.4911	36.0429	SLC7A2	18.428	1.38655	1.69291	1.96957	1.998	2.2868	1.16919
chrX	47232944	47233094	USP11	104	+	95.1306	144.688	160.762	131.336	62.9822	42.4034	USP11	130.839	1.52094	1.68991	1.38059	0.66206	0.445739	1.37536
chr12	51269811	51269961	SMAGP	37	-	26.4564	33.1576	44.6932	58.5041	18.3698	29.6824	SMAGP	33.1704	1.25329	1.68932	2.21134	0.694342	1.12194	1.25378
chr3	101512659	101512809	SENP7	79	-	55.7274	113.037	94.0559	62.086	44.6124	16.9614	SENP7	75.5548	2.02839	1.68779	1.1141	0.800547	0.304364	1.35579
chr1	27914477	27914627	RPA2	231	-	132.845	192.917	224.133	234.016	112.843	84.8068	RPA2	243.25	1.4522	1.68718	1.76157	0.849434	0.638389	1.83108
chr11	18698694	18698844	TMEM86A	239	+	85.5612	124.341	144.086	163.573	97.0975	48.7639	TMEM86A	141.896	1.45324	1.68401	1.91177	1.13483	0.56993	1.65842
chr3	49940407	49940557	RBM6	202	+	74.8661	91.1835	126.075	138.499	112.843	91.1673	RBM6	162.166	1.21795	1.68401	1.84996	1.50726	1.21774	2.16608
chr19	12052883	12053033	ZNF878	63	-	87.25	159.759	146.754	113.426	110.219	46.6437	ZNF878	116.096	1.83105	1.68199	1.30001	1.26326	0.534598	1.33061
chr8	143368794	143368944	RHPN1	80	+	30.9597	74.6046	52.0309	79.9954	70.855	19.0815	RHPN1	112.411	2.40973	1.6806	2.58386	2.28862	0.616333	3.63088
chr14	103715350	103715500	XRCC3	130	-	51.2242	91.1835	86.0512	201.779	131.213	95.4076	XRCC3	228.507	1.78009	1.67989	3.93913	2.56154	1.86255	4.46092
chr4	6640610	6640760	MRFAP1	352	+	105.263	168.049	176.772	156.409	141.71	86.9269	MRFAP1	189.808	1.59647	1.67934	1.48589	1.34625	0.825807	1.80318
chr9	4984962	4985112	JAK2	76	+	20.2645	52.7508	34.0202	44.1766	23.6183	23.3219	JAK2	71.8692	2.60311	1.67881	2.18	1.1655	1.15087	3.54656
chr15	44711444	44711594	B2M	770	+	566.28	1281.09	950.565	693.691	480.239	332.867	B2M	628.395	2.26229	1.67861	1.225	0.848059	0.587813	1.10969
chr12	53097587	53097737	IGFBP6	52	+	93.4419	104.748	156.76	109.844	36.7396	19.0815	IGFBP6	86.6116	1.121	1.67762	1.17553	0.393181	0.204207	0.926903
chr19	4247031	4247181	YJU2	62	+	23.079	41.447	38.6897	38.2067	26.2426	21.2017	YJU2	25.7992	1.79588	1.6764	1.65547	1.13708	0.918658	1.11786
chr2	96145367	96145517	DUSP2	162	-	87.25	152.977	146.087	145.663	57.7337	99.648	DUSP2	127.153	1.75332	1.67435	1.66949	0.661704	1.1421	1.45734
chr10	102226264	102226414	ELOVL3	36	+	9.56935	11.3037	16.0095	9.55169	10.497	10.6008	ELOVL3	22.1136	1.18124	1.673	0.998155	1.09694	1.10779	2.31088
chr11	82901678	82901828	DDIAS	38	+	12.3839	13.5645	20.679	39.4007	23.6183	6.36051	DDIAS	29.4848	1.09533	1.66983	3.18161	1.90718	0.513611	2.3809
chr17	45221798	45221948	FMNL1	29	+	12.3839	17.3324	20.679	35.8188	2.62426	19.0815	FMNL1	55.284	1.39959	1.66983	2.89237	0.211909	1.54083	4.46418
chr15	101489634	101489784	PCSK6	49	-	12.3839	9.79657	20.679	37.0128	36.7396	50.8841	PCSK6	66.3408	0.791073	1.66983	2.98878	2.96672	4.10889	5.35702
chr11	69641081	69641231	CCND1	670	+	632.14	992.468	1054.63	770.105	251.929	222.618	CCND1	659.722	1.57001	1.66835	1.21825	0.398534	0.352166	1.04363
chr1	150579530	150579680	MCL1	586	-	535.884	941.978	893.865	844.13	545.846	447.356	MCL1	685.522	1.7578	1.66802	1.57521	1.01859	0.8348	1.27924
chr15	44427134	44427284	CTDSPL2	103	+	81.6209	146.949	136.081	108.65	70.855	59.3647	CTDSPL2	103.197	1.80038	1.66723	1.33115	0.868099	0.727322	1.26435
chrX	12791338	12791488	PRPS2	22	+	20.8274	27.129	34.6873	38.2067	23.6183	36.0429	PRPS2	31.3276	1.30256	1.66546	1.83444	1.134	1.73055	1.50415
chr9	122264476	122264626	RBM18	186	-	73.7403	155.238	122.74	138.499	94.4733	44.5236	RBM18	108.725	2.1052	1.66449	1.8782	1.28116	0.603789	1.47443
chr6	116511575	116511725	CALHM5	28	+	34.9	66.3152	58.0345	63.2799	39.3639	10.6008	CALHM5	36.856	1.90015	1.66288	1.81318	1.12791	0.303748	1.05605
chr11	67508084	67508234	CDK2AP2	475	-	167.745	217.032	278.833	177.9	157.455	156.893	CDK2AP2	254.306	1.29382	1.66224	1.06054	0.938657	0.935307	1.51603
chr17	42562088	42562238	COASY	232	+	64.7338	105.502	107.397	115.814	81.352	86.9269	COASY	130.839	1.62978	1.65906	1.78908	1.25672	1.34284	2.02119
chr1	93180643	93180793	CCDC18	39	+	25.3306	31.6505	42.025	51.3403	31.4911	21.2017	CCDC18	51.5984	1.2495	1.65906	2.02681	1.2432	0.837	2.037
chr1	68496975	68497125	DEPDC1	33	-	19.7016	31.6505	32.6861	82.3833	28.8668	12.721	DEPDC1	86.6116	1.60649	1.65906	4.18155	1.4652	0.645684	4.39617
chr4	52751545	52751695	ERVMER34-1	33	-	5.62903	3.76791	9.33889	15.5215	10.497	4.24034	ERVMER34-1	7.3712	0.669371	1.65906	2.7574	1.8648	0.753299	1.3095
chr6	89412198	89412348	RRAGD	40	-	11.2581	15.8252	18.6778	45.3705	20.9941	33.9227	RRAGD	42.3844	1.40567	1.65905	4.03003	1.8648	3.01318	3.76479
chr3	43690861	43691011	ABHD5	367	+	729.522	1093.45	1208.05	1929.44	1485.33	1036.76	ABHD5	1326.82	1.49886	1.65595	2.6448	2.03603	1.42115	1.81875
chr6	26043626	26043776	HIST1H2BB	260	-	94.0048	120.573	155.426	134.918	152.207	106.008	HIST1H2BB	164.009	1.28263	1.65338	1.43522	1.61914	1.12769	1.74469
chr12	102120141	102120291	PARPBP	28	+	21.3903	32.404	35.3544	47.7584	13.1213	8.48068	PARPBP	42.3844	1.51489	1.65282	2.23271	0.613423	0.396473	1.98148
chr14	72894017	72894167	DPF3	28	-	18.5758	33.9112	30.6849	29.849	15.7455	21.2017	DPF3	33.1704	1.82556	1.65188	1.60688	0.847635	1.14136	1.78568
chr9	104747657	104747807	NIPSNAP3A	192	+	84.4354	177.092	139.416	95.5169	68.2307	65.7252	NIPSNAP3A	108.725	2.09737	1.65116	1.13124	0.808082	0.778408	1.28767
chr9	107489694	107489844	KLF4	1276	-	553.334	889.227	912.543	666.23	375.269	311.665	KLF4	691.05	1.60703	1.64917	1.20403	0.678196	0.563249	1.24888
chr2	68157444	68157594	WDR92	65	-	33.2113	39.1863	54.6992	53.7282	39.3639	40.2832	WDR92	51.5984	1.17991	1.64701	1.61777	1.18526	1.21294	1.55364
chr14	31420474	31420624	HEATR5A	635	-	508.301	826.68	837.165	810.699	474.991	394.351	HEATR5A	757.391	1.62636	1.64699	1.59492	0.934468	0.775822	1.49004
chr11	4393597	4393747	TRIM21	51	-	50.6613	174.078	83.3829	83.5773	44.6124	21.2017	TRIM21	42.3844	3.43611	1.64589	1.64973	0.880601	0.418499	0.836623
chr11	60842039	60842189	CCDC86	100	+	34.9	34.6648	57.3675	124.172	65.6064	65.7252	CCDC86	88.4544	0.993261	1.64377	3.55794	1.87984	1.88324	2.53451
chr11	86672339	86672489	ME3	41	-	17.45	24.1146	28.6837	31.043	31.4911	14.8412	ME3	36.856	1.38193	1.64377	1.77897	1.80465	0.850499	2.11209
chr2	62196054	62196204	B3GNT2	240	+	216.718	319.519	356.212	250.732	146.958	114.489	B3GNT2	281.948	1.47435	1.64367	1.15695	0.678107	0.528286	1.30099
chr8	90001405	90001555	DECR1	123	+	123.839	218.539	203.454	143.275	70.855	59.3647	DECR1	110.568	1.7647	1.64289	1.15695	0.572154	0.47937	0.892837
chr19	21767485	21767635	ZNF100	104	-	58.5419	73.0975	96.0571	99.0988	57.7337	27.5622	ZNF100	105.04	1.24864	1.64083	1.69278	0.986195	0.470812	1.79427
chr1	206202770	206202920	FAM72A	25	-	14.6355	21.8539	24.0143	26.2671	13.1213	4.24034	FAM72A	38.6988	1.49321	1.64083	1.79475	0.896539	0.28973	2.64417
chr18	49561985	49562135	LIPG	195	+	7.31774	16.5788	12.0071	16.7155	31.4911	59.3647	LIPG	77.3976	2.26556	1.64082	2.28424	4.30339	8.11244	10.5767
chr9	105448041	105448191	FSD1L	63	+	45.5951	42.2006	74.7111	99.0988	62.9822	40.2832	FSD1L	68.1836	0.925551	1.63858	2.17345	1.38134	0.883498	1.49542
chr2	207711530	207711680	CCNYL1	89	+	82.7467	104.748	135.414	101.487	62.9822	65.7252	CCNYL1	130.839	1.26589	1.63649	1.22648	0.761145	0.794294	1.5812
chr16	83953165	83953315	OSGIN1	359	+	87.25	159.006	142.752	154.021	91.849	108.129	OSGIN1	195.337	1.82242	1.63613	1.76528	1.05271	1.2393	2.23882
chr6	26272862	26273012	HIST1H2BI	819	+	355.192	694.803	581.012	427.438	330.656	226.858	HIST1H2BI	410.944	1.95613	1.63577	1.2034	0.930922	0.638691	1.15696
chrX	71118556	71118706	MED12	51	+	16.3242	27.129	26.6825	29.849	31.4911	42.4034	MED12	33.1704	1.66189	1.63454	1.82851	1.92911	2.59758	2.03198
chr1	9943414	9943564	NMNAT1	520	+	311.848	428.035	509.636	421.468	236.183	175.974	NMNAT1	398.045	1.37258	1.63424	1.35152	0.757366	0.564294	1.27641
chr11	125887631	125887781	HYLS1	385	+	178.44	273.55	291.507	232.822	123.34	135.691	HYLS1	293.005	1.53301	1.63364	1.30476	0.691213	0.760429	1.64204
chr6	30717169	30717319	MDC1	224	-	46.158	58.7794	75.3782	132.53	83.9762	108.129	MDC1	187.966	1.27344	1.63305	2.87122	1.81932	2.34258	4.07223
chr11	19117101	19117251	ZDHHC13	74	+	59.6677	60.2866	97.3913	83.5773	97.0975	53.0042	ZDHHC13	73.712	1.01037	1.63223	1.40071	1.6273	0.888323	1.23538
chrX	30653371	30653521	GK	42	+	29.8339	45.2149	48.6956	54.9222	36.7396	29.6824	GK	40.5416	1.51555	1.63222	1.84093	1.23147	0.994922	1.35891
chr2	17753302	17753452	GEN1	88	+	38.8403	54.2579	63.371	83.5773	41.9881	53.0042	GEN1	66.3408	1.39695	1.63158	2.15182	1.08104	1.36467	1.70804
chr4	4859594	4859744	MSX1	1015	+	568.532	981.918	927.218	859.652	530.1	580.926	MSX1	901.129	1.72711	1.6309	1.51206	0.932401	1.0218	1.58501
chr17	7579541	7579691	CD68	42	+	61.3564	125.848	100.06	132.53	91.849	101.768	CD68	68.1836	2.0511	1.6308	2.16	1.49698	1.65864	1.11127
chr3	158571142	158571292	MLF1	185	+	61.3564	99.4729	100.06	79.9954	36.7396	59.3647	MLF1	106.882	1.62123	1.6308	1.30378	0.59879	0.967539	1.74199
chr7	48089170	48089320	UPP1	412	+	83.8725	118.312	136.748	225.659	144.334	142.051	UPP1	235.878	1.41062	1.63043	2.6905	1.72087	1.69365	2.81234
chrX	56232374	56232524	KLF8	56	+	27.0193	36.172	44.0262	60.892	49.8609	29.6824	KLF8	66.3408	1.33875	1.62944	2.25365	1.84538	1.09856	2.45531
chr1	40862276	40862426	CITED4	185	-	54.0387	75.3582	88.0524	101.487	97.0975	86.9269	CITED4	121.625	1.39452	1.62943	1.87804	1.79681	1.6086	2.2507
chr17	57256528	57256678	MSI2	30	+	22.5161	28.6361	36.6885	53.7282	41.9881	31.8025	MSI2	55.284	1.27181	1.62943	2.38621	1.8648	1.41243	2.45531
chr1	41361405	41361555	FOXO6	37	+	9.00645	5.27508	14.6754	13.1336	23.6183	42.4034	FOXO6	27.642	0.5857	1.62943	1.45824	2.62238	4.70811	3.06913
chr11	117328073	117328223	CEP164	464	+	302.842	579.505	492.96	341.473	183.698	152.652	CEP164	394.359	1.91356	1.62778	1.12756	0.60658	0.504065	1.30219
chr6	26225063	26225213	HIST1H3E	798	+	172.811	312.737	280.834	296.102	262.426	178.094	HIST1H3E	385.145	1.80971	1.62509	1.71344	1.51857	1.03057	2.22871
chr8	133297176	133297326	NDRG1	1861	-	809.454	1217.04	1314.78	866.816	540.597	468.557	NDRG1	879.016	1.50353	1.62428	1.07087	0.667854	0.578856	1.08594
chr20	3239114	3239264	SLC4A11	73	-	30.3968	37.6791	49.3627	46.5645	28.8668	23.3219	SLC4A11	62.6552	1.23957	1.62394	1.53189	0.949666	0.767249	2.06124
chr12	109713752	109713902	FAM222A	631	+	482.971	822.912	783.8	494.3	259.802	318.025	FAM222A	558.368	1.70385	1.62287	1.02346	0.537925	0.658476	1.15611
chr3	138434538	138434688	ESYT3	67	+	21.3903	28.6361	34.6873	47.7584	44.6124	33.9227	ESYT3	49.7556	1.33874	1.62164	2.23271	2.08564	1.58589	2.32608
chr19	22634267	22634417	ZNF492	36	+	10.6952	20.3467	17.3436	28.6551	10.497	12.721	ZNF492	12.8996	1.90241	1.62162	2.67925	0.981468	1.18941	1.20611
chr9	99222220	99222370	SEC61B	311	+	113.143	171.063	183.442	151.633	86.6005	69.9656	SEC61B	138.21	1.51192	1.62133	1.34019	0.765407	0.618382	1.22155
chr8	94895128	94895278	CCNE2	160	-	81.058	134.891	131.411	132.53	55.1094	89.0471	CCNE2	206.394	1.66413	1.6212	1.635	0.679876	1.09856	2.54625
chr6	2903233	2903383	SERPINB9	261	-	589.359	1120.58	955.235	361.77	97.0975	82.6866	SERPINB9	215.608	1.90135	1.6208	0.613836	0.164751	0.140299	0.365835
chr8	73972177	73972327	ELOC	149	-	84.4354	129.616	136.748	97.9048	41.9881	63.6051	ELOC	92.14	1.53509	1.61956	1.15952	0.497281	0.753299	1.09125
chr19	53254752	53254902	ZNF677	241	-	149.732	184.628	242.144	222.077	110.219	114.489	ZNF677	219.293	1.23306	1.61718	1.48316	0.736109	0.764626	1.46457
chr15	40382892	40383042	KNSTRN	121	+	55.7274	93.4442	90.0536	90.741	62.9822	46.6437	KNSTRN	128.996	1.67681	1.61597	1.6283	1.13018	0.836998	2.31477
chr9	104094530	104094680	SMC2	52	+	18.5758	33.1576	30.0179	25.0732	13.1213	48.7639	SMC2	35.0132	1.78499	1.61597	1.34978	0.706365	2.62513	1.88488
chr11	108009266	108009416	CUL5	108	+	63.608	103.994	102.728	94.3229	44.6124	33.9227	CUL5	92.14	1.63492	1.61502	1.48288	0.701365	0.533309	1.44856
chr7	101252223	101252373	FIS1	163	-	90.0645	116.052	145.42	140.887	102.346	93.2874	FIS1	176.909	1.28854	1.61462	1.56429	1.13636	1.03578	1.96425
chr22	17774388	17774538	BID	58	-	59.1048	92.6906	95.3901	93.1289	52.4852	29.6824	BID	62.6552	1.56824	1.61391	1.57566	0.888002	0.502199	1.06007
chr8	56074428	56074578	RPS20	807	-	499.295	958.557	805.813	599.368	440.875	307.425	RPS20	768.448	1.91982	1.6139	1.20043	0.882995	0.615718	1.53907
chr6	27809978	27810128	HIST1H3H	1045	+	537.572	1048.99	867.182	626.829	490.736	354.068	HIST1H3H	702.107	1.95135	1.61315	1.16604	0.912875	0.658643	1.30607
chr17	56913969	56914119	TRIM25	398	-	243.174	767.9	392.233	290.132	217.813	135.691	TRIM25	265.363	3.15782	1.61297	1.1931	0.895708	0.558	1.09125
chr3	10164842	10164992	IRAK2	185	+	82.7467	113.037	133.413	128.948	89.2248	65.7252	IRAK2	117.939	1.36606	1.61231	1.55835	1.07829	0.794294	1.4253
chr11	77994749	77994899	INTS4	37	-	48.4097	95.705	78.0464	26.2671	2.62426	12.721	INTS4	22.1136	1.97698	1.61221	0.5426	0.0542094	0.262778	0.456801
chr4	56530548	56530698	THEGL	202	+	118.773	177.845	191.447	150.439	112.843	69.9656	THEGL	141.896	1.49735	1.61187	1.26661	0.950073	0.58907	1.19468
chr9	136665722	136665872	EGFL7	44	+	14.0726	12.8109	22.6802	54.9222	52.4852	44.5236	EGFL7	70.0264	0.910344	1.61166	3.90278	3.7296	3.16385	4.97608
chr6	26033535	26033685	HIST1H2AB	1080	-	333.239	690.281	536.986	376.098	280.796	178.094	HIST1H2AB	468.071	2.07143	1.61141	1.12861	0.842626	0.534433	1.40461
chr10	101588102	101588252	POLL	141	-	94.0048	140.92	151.423	185.064	118.092	59.3647	POLL	125.31	1.49907	1.6108	1.96867	1.25623	0.631507	1.33302
chr1	149852544	149852694	HIST2H3A	528	+	189.698	413.717	305.515	282.969	183.698	178.094	HIST2H3A	532.569	2.18092	1.61053	1.49168	0.968371	0.938829	2.80746
chr6	131135660	131135810	AKAP7	65	+	59.6677	101.734	96.0571	113.426	34.1153	36.0429	AKAP7	90.2972	1.70501	1.60987	1.90096	0.571755	0.60406	1.51333
chr12	112125477	112125627	TRAFD1	339	+	273.571	594.576	440.262	288.939	144.334	108.129	TRAFD1	252.464	2.17339	1.60932	1.05618	0.527592	0.39525	0.922846
chrX	70289837	70289987	PDZD11	93	-	58.5419	112.284	94.0559	87.1591	36.7396	33.9227	PDZD11	62.6552	1.91801	1.60664	1.48883	0.627578	0.57946	1.07026
chr8	19313610	19313760	SH2D4A	60	+	25.3306	27.129	40.6909	40.5947	20.9941	12.721	SH2D4A	51.5984	1.071	1.60639	1.6026	0.828804	0.502199	2.037
chr13	102773672	102773822	TEX30	423	-	453.137	616.43	727.766	704.437	359.523	279.862	TEX30	609.967	1.36036	1.60606	1.55458	0.793409	0.61761	1.3461
chr10	70233328	70233478	PPA1	192	-	120.461	185.381	193.448	180.288	99.7218	89.0471	PPA1	199.022	1.53893	1.6059	1.49665	0.827835	0.739219	1.65217
chr4	185395952	185396102	ANKRD37	179	+	77.6806	97.9657	124.741	181.482	139.086	131.45	ANKRD37	176.909	1.26113	1.60582	2.33626	1.79049	1.69219	2.27739
chr1	228457788	228457938	HIST3H2A	1086	-	277.511	452.903	445.598	389.231	351.651	248.06	HIST3H2A	519.67	1.63202	1.60569	1.40258	1.26716	0.893874	1.87261
chr9	120876302	120876452	PHF19	123	-	27.0193	40.6934	43.3591	81.1893	49.8609	46.6437	PHF19	103.197	1.50609	1.60475	3.00486	1.84538	1.72631	3.81938
chr16	89575728	89575878	CPNE7	74	+	9.56935	10.5502	15.3425	31.043	26.2426	50.8841	CPNE7	33.1704	1.1025	1.6033	3.244	2.74236	5.3174	3.46632
chr19	589840	589990	HCN2	23	+	9.56935	10.5502	15.3425	14.3275	18.3698	23.3219	HCN2	23.9564	1.1025	1.6033	1.49723	1.91965	2.43715	2.50345
chr11	73376327	73376477	RELT	871	+	483.534	881.691	775.128	807.118	485.488	466.437	RELT	827.417	1.82343	1.60305	1.66921	1.00404	0.964642	1.71119
chr20	38033469	38033619	RPRD1B	234	+	116.521	177.092	186.778	174.318	81.352	67.8454	RPRD1B	193.494	1.51983	1.60296	1.49602	0.698175	0.582259	1.66059
chr1	159009906	159010056	IFI16	200	+	171.122	484.553	274.163	182.676	107.595	59.3647	IFI16	90.2972	2.83162	1.60215	1.06752	0.628762	0.346914	0.527677
chr1	149812291	149812441	HIST2H2BF	846	-	251.618	394.124	402.906	294.908	335.905	201.416	HIST2H2BF	375.931	1.56636	1.60126	1.17205	1.33498	0.800483	1.49405
chr19	23914823	23914973	ZNF726	88	+	33.7742	46.7221	54.0321	91.935	62.9822	25.442	ZNF726	90.2972	1.38337	1.5998	2.72205	1.8648	0.753297	2.67356
chr9	72149374	72149524	GDA	23	+	11.2581	23.3611	18.0107	20.2973	10.497	4.24034	GDA	27.642	2.07505	1.5998	1.80291	0.932395	0.376648	2.4553
chr1	85048398	85048548	MCOLN3	23	-	11.2581	14.3181	18.0107	25.0732	26.2426	36.0429	MCOLN3	36.856	1.2718	1.5998	2.22713	2.331	3.20151	3.27373
chr11	64186127	64186277	STIP1	316	+	127.779	143.181	204.121	154.021	112.843	93.2874	STIP1	197.18	1.12054	1.59745	1.20537	0.883111	0.730068	1.54313
chr20	57391324	57391474	RBM38	393	+	287.081	436.324	458.273	314.012	170.577	167.493	RBM38	422.001	1.51986	1.59632	1.09381	0.594177	0.583435	1.46997
chr21	14383060	14383210	HSPA13	217	-	100.76	119.066	160.762	114.62	131.213	89.0471	HSPA13	217.45	1.18168	1.59549	1.13755	1.30223	0.883754	2.1581
chr1	18902472	18902622	ALDH4A1	227	-	102.448	126.602	163.431	150.439	83.9762	101.768	ALDH4A1	164.009	1.23577	1.59526	1.46844	0.819696	0.993362	1.6009
chr1	178094022	178094172	RASAL2	44	+	29.271	28.6361	46.6944	52.5343	18.3698	27.5622	RASAL2	38.6988	0.97831	1.59524	1.79476	0.627577	0.941621	1.32209
chr22	19479838	19479988	CDC45	27	+	14.6355	27.129	23.3472	51.3403	36.7396	16.9614	CDC45	35.0132	1.85364	1.59524	3.50793	2.51031	1.15892	2.39235
chr3	38137365	38137515	MYD88	467	+	213.34	531.276	340.202	304.46	212.565	152.652	MYD88	311.433	2.49028	1.59465	1.42711	0.996367	0.715534	1.4598
chr3	172750672	172750822	ECT2	66	+	30.9597	39.9399	49.3627	58.5041	44.6124	38.163	ECT2	90.2972	1.29006	1.59442	1.88969	1.44098	1.23267	2.9166
chr11	35618338	35618488	FJX1	48	+	16.3242	22.6075	26.0155	37.0128	28.8668	27.5622	FJX1	35.0132	1.38491	1.59368	2.26736	1.76834	1.68843	2.14486
chr6	27890746	27890896	HIST1H3J	797	-	319.166	503.393	508.302	414.304	419.881	224.738	HIST1H3J	556.526	1.57721	1.59259	1.29808	1.31556	0.704141	1.74369
chr20	56392142	56392292	AURKA	80	-	37.7145	48.2293	60.0357	85.9652	49.8609	25.442	AURKA	106.882	1.2788	1.59185	2.27937	1.32206	0.674595	2.83398
chr16	31713210	31713360	ZNF720	518	+	451.448	661.645	718.427	624.442	267.674	231.098	ZNF720	598.91	1.46561	1.59138	1.3832	0.592923	0.511904	1.32664
chr2	24049668	24049818	FKBP1B	54	+	59.1048	110.023	94.0559	78.8014	52.4852	27.5622	FKBP1B	51.5984	1.86149	1.59134	1.33325	0.888002	0.466328	0.872998
chr14	101964499	101964649	DYNC1H1	623	+	507.738	816.883	807.814	573.101	354.275	360.429	DYNC1H1	633.923	1.60887	1.59101	1.12873	0.697752	0.709872	1.24852
chr19	51927410	51927560	ZNF613	92	+	41.0919	76.1118	65.3722	51.3403	31.4911	40.2832	ZNF613	68.1836	1.85223	1.59088	1.2494	0.766358	0.98032	1.6593
chr1	27012775	27012925	TENT5B	189	-	21.3903	21.8539	34.0202	52.5343	60.3579	80.5664	TENT5B	86.6116	1.02167	1.59045	2.45599	2.82174	3.76649	4.04911
chr21	33588581	33588731	DONSON	188	-	135.097	204.221	214.794	235.21	175.825	150.532	DONSON	239.564	1.51166	1.58992	1.74105	1.30147	1.11425	1.77327
chr8	8701858	8702008	CLDN23	137	+	94.0048	159.759	149.422	158.797	91.849	61.4849	CLDN23	97.6684	1.69948	1.58951	1.68924	0.977067	0.654061	1.03897
chr11	7513917	7514067	PPFIBP2	134	+	95.6935	100.226	152.09	137.306	81.352	53.0042	PPFIBP2	138.21	1.04736	1.58935	1.43485	0.850131	0.553896	1.4443
chr11	90222974	90223124	CHORDC1	318	-	156.487	201.206	248.148	290.132	165.328	150.532	CHORDC1	241.407	1.28577	1.58574	1.85403	1.0565	0.961946	1.54266
chrX	119943619	119943769	NKAP	161	-	79.9322	116.805	126.742	107.456	76.1035	59.3647	NKAP	136.367	1.4613	1.58562	1.34434	0.952101	0.742688	1.70603
chr10	5977472	5977622	IL15RA	23	-	55.1645	105.502	87.3853	66.8618	36.7396	21.2017	IL15RA	40.5416	1.9125	1.58409	1.21204	0.666001	0.384336	0.734922
chr6	30489437	30489587	HLA-E	920	+	566.843	1235.12	897.867	539.67	351.651	186.575	HLA-E	458.857	2.17895	1.58398	0.952063	0.620368	0.329148	0.809496
chr14	104978297	104978447	AHNAK2	170	-	117.084	122.08	185.444	211.331	133.837	131.45	AHNAK2	269.049	1.04267	1.58385	1.80495	1.14309	1.1227	2.29791
chr17	56978086	56978236	SCPEP1	68	+	80.4951	166.542	127.409	91.935	57.7337	61.4849	SCPEP1	90.2972	2.06897	1.58282	1.14212	0.717232	0.763834	1.12177
chr8	143558300	143558450	GSDMD	45	+	72.6145	181.613	114.735	84.7712	65.6064	21.2017	GSDMD	51.5984	2.50106	1.58006	1.16741	0.903489	0.291976	0.71058
chr2	10120358	10120508	RRM2	275	+	42.2177	46.7221	66.7063	85.9652	49.8609	97.5278	RRM2	93.9828	1.10669	1.58006	2.03624	1.18104	2.31012	2.22615
chr16	31032911	31033061	STX4	40	+	23.6419	45.2149	37.3556	22.6853	7.87277	16.9614	STX4	16.5852	1.91249	1.58006	0.959538	0.333001	0.71743	0.701517
chr2	176129660	176129810	HOXD8	64	+	3.37742	8.28941	5.33651	15.5215	13.1213	23.3219	HOXD8	22.1136	2.45436	1.58006	4.59567	3.88501	6.90524	6.54748
chr7	23597409	23597559	CCDC126	130	+	74.3032	118.312	117.403	72.8316	47.2366	48.7639	CCDC126	77.3976	1.59229	1.58005	0.980195	0.635728	0.656283	1.04165
chr1	95117329	95117479	TMEM56	41	+	15.1984	16.5788	24.0143	34.6249	44.6124	27.5622	TMEM56	44.2272	1.09083	1.58005	2.27819	2.93534	1.81349	2.90999
chr1	95117329	95117479	TMEM56-RWDD3	41	+	15.1984	16.5788	24.0143	34.6249	44.6124	27.5622	TMEM56-RWDD3	44.2272	1.09083	1.58005	2.27819	2.93534	1.81349	2.90999
chr9	112175378	112175528	SUSD1	22	-	10.1323	12.8109	16.0095	22.6853	13.1213	10.6008	SUSD1	20.2708	1.26436	1.58005	2.23891	1.295	1.04624	2.00061
chr11	102798080	102798230	MMP1	50	-	6.75484	10.5502	10.673	25.0732	68.2307	40.2832	MMP1	38.6988	1.56187	1.58005	3.71189	10.101	5.96361	5.72905
chr17	43546292	43546442	ETV4	28	-	5.06613	5.27508	8.00476	20.2973	15.7455	8.48068	ETV4	23.9564	1.04124	1.58005	4.00647	3.10799	1.674	4.72874
chr11	66728103	66728253	SPTBN2	19	-	1.68871	0	2.66825	14.3275	10.497	14.8412	SPTBN2	9.214	0	1.58005	8.48429	6.21599	8.78848	5.45624
chr1	16155962	16156112	EPHA2	198	-	30.9597	65.5617	48.6956	102.681	89.2248	76.3261	EPHA2	121.625	2.11765	1.57287	3.3166	2.88197	2.46534	3.92849
chr15	100879759	100879909	ALDH1A3	248	+	60.2306	61.7937	94.723	85.9652	133.837	150.532	ALDH1A3	93.9828	1.02595	1.57267	1.42727	2.22208	2.49926	1.56038
chr12	25195220	25195370	ETFRF1	248	+	87.8129	142.427	138.082	155.215	115.467	86.9269	ETFRF1	154.795	1.62194	1.57246	1.76756	1.31492	0.98991	1.76278
chr22	28800466	28800616	XBP1	557	-	391.78	480.786	615.7	416.692	333.281	347.708	XBP1	556.526	1.22718	1.57155	1.06359	0.850684	0.887508	1.42051
chr16	2721011	2721161	PRSS27	81	-	48.4097	73.8511	76.0452	91.935	107.595	55.1244	PRSS27	77.3976	1.52554	1.57087	1.8991	2.22259	1.13871	1.5988
chr4	133149219	133149369	PCDH10	708	+	302.842	599.852	475.616	266.253	149.583	144.172	PCDH10	315.119	1.98074	1.57051	0.879181	0.493931	0.476063	1.04054
chr10	27155125	27155275	YME1L1	284	-	225.161	492.089	353.544	323.563	162.704	154.772	YME1L1	274.577	2.1855	1.57018	1.43703	0.722612	0.687384	1.21947
chr7	64666065	64666215	ZNF107	61	+	65.8596	179.353	103.395	114.62	57.7337	23.3219	ZNF107	116.096	2.72326	1.56993	1.74037	0.876618	0.354115	1.76278
chr6	27814951	27815101	HIST1H2BM	381	+	95.6935	166.542	150.089	170.736	181.074	152.652	HIST1H2BM	234.036	1.74037	1.56843	1.7842	1.89223	1.59522	2.44568
chr16	3443395	3443545	ZNF597	39	-	36.5887	44.4614	57.3675	47.7584	26.2426	14.8412	ZNF597	40.5416	1.21517	1.5679	1.30528	0.717232	0.405623	1.10804
chr12	118016661	118016811	RFC5	75	+	34.9	51.9972	54.6992	97.9048	26.2426	19.0815	RFC5	82.926	1.48989	1.56731	2.8053	0.751937	0.546748	2.3761
chr16	21303001	21303151	CRYM	159	-	82.7467	137.152	129.41	136.112	99.7218	67.8454	CRYM	112.411	1.65749	1.56393	1.64492	1.20515	0.819917	1.3585
chr6	158818159	158818309	EZR	340	-	167.745	208.742	262.156	226.853	167.952	159.013	EZR	250.621	1.2444	1.56282	1.35237	1.00123	0.947945	1.49406
chr17	68035666	68035816	KPNA2	232	+	120.461	143.934	188.112	257.896	199.444	178.094	KPNA2	315.119	1.19486	1.5616	2.14091	1.65567	1.47844	2.61594
chr1	1919197	1919347	TMEM52	42	-	23.079	29.3897	36.0214	28.6551	7.87277	19.0815	TMEM52	29.4848	1.27344	1.56079	1.24161	0.341123	0.826791	1.27756
chr3	44761533	44761683	KIAA1143	170	-	69.2371	102.487	108.064	119.396	83.9762	55.1244	KIAA1143	116.096	1.48023	1.56078	1.72445	1.21288	0.796169	1.67679
chr4	140150714	140150864	MAML3	47	-	33.7742	97.9657	52.698	59.698	34.1153	27.5622	MAML3	42.3844	2.90061	1.5603	1.76756	1.0101	0.816073	1.25493
chr11	94493932	94494082	ANKRD49	113	+	76.5548	91.937	119.404	101.487	39.3639	38.163	ANKRD49	99.5112	1.20093	1.55972	1.32568	0.514192	0.498506	1.29987
chr6	109382349	109382499	CD164	860	-	321.418	734.743	500.965	368.934	301.79	218.377	CD164	431.215	2.28594	1.55861	1.14783	0.938933	0.679417	1.3416
chr3	49411976	49412126	RHOA	194	-	41.0919	30.1433	64.0381	79.9954	149.583	99.648	RHOA	68.1836	0.733558	1.55841	1.94674	3.64021	2.425	1.6593
chr11	124954115	124954265	CCDC15	160	+	50.0984	86.662	78.0464	81.1893	57.7337	36.0429	CCDC15	93.9828	1.72984	1.55786	1.6206	1.15241	0.719442	1.87596
chr1	156728660	156728810	ISG20L2	91	-	55.7274	68.576	86.7182	74.0256	44.6124	42.4034	ISG20L2	77.3976	1.23056	1.55611	1.32835	0.800547	0.760908	1.38886
chr11	313975	314125	IFITM1	273	+	431.747	1294.65	671.733	505.045	325.408	203.536	IFITM1	388.831	2.99863	1.55585	1.16977	0.753701	0.471424	0.900599
chr20	2692696	2692846	EBF4	20	+	18.0129	21.1003	28.0167	29.849	36.7396	33.9227	EBF4	29.4848	1.1714	1.55537	1.65709	2.03963	1.88324	1.63687
chr1	99766529	99766679	FRRS1	23	-	18.0129	34.6648	28.0167	20.2973	2.62426	4.24034	FRRS1	9.214	1.92444	1.55537	1.12682	0.145688	0.235406	0.511522
chr18	54828417	54828567	RAB27B	18	+	9.00645	10.5502	14.0083	27.4611	26.2426	27.5622	RAB27B	18.428	1.1714	1.55536	3.04905	2.91376	3.06027	2.04609
chr5	169583701	169583851	SPDL1	156	+	86.6871	133.384	134.747	140.887	60.3579	50.8841	SPDL1	156.638	1.53868	1.55441	1.62524	0.696273	0.586986	1.80694
chr8	106657801	106657951	OXR1	91	+	77.6806	90.4299	120.738	130.142	115.467	53.0042	OXR1	108.725	1.16412	1.55429	1.67535	1.48643	0.682335	1.39964
chr11	62678992	62679142	UBXN1	190	-	112.018	165.035	174.104	152.827	97.0975	99.648	UBXN1	204.551	1.47329	1.55425	1.36431	0.866803	0.889571	1.82605
chr4	121696899	121697049	ANXA5	842	-	367.013	467.975	570.339	490.718	322.784	298.944	ANXA5	538.098	1.27509	1.554	1.33706	0.879489	0.814532	1.46616
chr2	46297333	46297483	EPAS1	274	+	409.23	656.37	635.711	490.718	291.293	175.974	EPAS1	398.045	1.60391	1.55343	1.19913	0.711808	0.430012	0.972668
chr18	63970039	63970189	SERPINB8	126	+	83.3096	122.834	129.41	94.3229	44.6124	50.8841	SERPINB8	117.939	1.47443	1.55336	1.1322	0.535501	0.610783	1.41567
chr5	178232712	178232862	PHYKPL	117	-	74.3032	107.009	115.402	126.56	70.855	61.4849	PHYKPL	93.9828	1.44017	1.55312	1.70329	0.953593	0.827487	1.26486
chr17	64506206	64506356	DDX5	746	-	594.988	944.992	923.883	706.825	553.718	379.51	DDX5	879.016	1.58825	1.55278	1.18797	0.930637	0.637845	1.47737
chr14	21511240	21511390	METTL3	220	-	72.6145	105.502	112.734	162.379	157.455	139.931	METTL3	189.808	1.45291	1.5525	2.23618	2.16837	1.92704	2.61391
chr17	30831919	30832069	ATAD5	44	+	23.6419	36.9255	36.6885	59.698	39.3639	21.2017	ATAD5	75.5548	1.56187	1.55184	2.52509	1.66501	0.896785	3.1958
chr22	29267774	29267924	RHBDD3	245	-	101.885	139.413	158.094	325.951	170.577	103.888	RHBDD3	291.162	1.36834	1.55169	3.1992	1.67421	1.01966	2.85775
chr16	83807933	83808083	HSBP1	224	+	100.197	152.224	155.426	146.857	99.7218	78.4463	HSBP1	154.795	1.51925	1.5512	1.46568	0.995257	0.782921	1.54491
chr2	216633356	216633506	IGFBP2	57	+	43.9064	44.4614	68.0405	70.4437	52.4852	44.5236	IGFBP2	92.14	1.01264	1.54967	1.60441	1.19539	1.01406	2.09856
chr11	560629	560779	LMNTD2	41	-	21.9532	24.1146	34.0202	63.2799	31.4911	21.2017	LMNTD2	47.9128	1.09845	1.54967	2.88249	1.43447	0.965768	2.1825
chr3	188153870	188154020	LPP	69	+	21.9532	54.2579	34.0202	35.8188	15.7455	16.9614	LPP	23.9564	2.47153	1.54967	1.6316	0.71723	0.772616	1.09125
chr19	32691776	32691926	NUDT19	249	+	108.64	140.92	168.1	199.391	118.092	95.4076	NUDT19	193.494	1.29713	1.54731	1.83534	1.087	0.8782	1.78106
chr9	96655226	96655376	PRXL2C	157	-	110.892	141.673	171.435	132.53	112.843	78.4463	PRXL2C	158.481	1.27758	1.54596	1.19513	1.01759	0.707412	1.42915
chr6	24720765	24720915	C6orf62	1177	-	717.138	1301.44	1108.66	814.281	514.355	457.957	C6orf62	936.142	1.81477	1.54595	1.13546	0.717233	0.63859	1.30539
chr6	137867183	137867333	TNFAIP3	119	+	162.679	281.84	251.483	186.258	36.7396	57.2446	TNFAIP3	82.926	1.73249	1.54588	1.14494	0.225841	0.351887	0.509752
chrX	48802115	48802265	HDAC6	21	+	12.9468	29.3897	20.0119	32.2369	23.6183	14.8412	HDAC6	35.0132	2.27004	1.5457	2.48995	1.82426	1.14632	2.70439
chr17	43006722	43006872	IFI35	80	+	146.355	445.367	226.135	118.202	83.9762	50.8841	IFI35	70.0264	3.04306	1.54511	0.807639	0.573784	0.347676	0.478469
chr11	43680690	43680840	HSD17B12	186	+	55.7274	89.6763	86.0512	118.202	123.34	67.8454	HSD17B12	145.581	1.6092	1.54415	2.12108	2.21327	1.21745	2.61238
chr15	40695115	40695265	RAD51	55	+	42.7806	54.2579	66.0393	71.6377	34.1153	12.721	RAD51	82.926	1.26828	1.54367	1.67454	0.797448	0.297354	1.9384
chr2	42047948	42048098	PKDCC	286	+	54.0387	67.8224	83.3829	103.875	91.849	76.3261	PKDCC	180.594	1.25507	1.54302	1.92223	1.69969	1.41243	3.34194
chr14	20469334	20469484	PNP	505	+	220.095	370.762	339.535	317.594	157.455	146.292	PNP	296.691	1.68455	1.54267	1.44299	0.715396	0.664677	1.34801
chr20	61252187	61252337	CDH4	128	+	35.4629	48.2293	54.6992	65.6678	68.2307	82.6866	CDH4	66.3408	1.35999	1.54243	1.85173	1.924	2.33164	1.87071
chr17	82051738	82051888	RFNG	135	-	52.35	70.0832	80.7147	68.0558	81.352	59.3647	RFNG	112.411	1.33874	1.54183	1.30002	1.554	1.134	2.1473
chr15	75843429	75843579	UBE2Q2	108	+	114.832	163.527	176.772	167.155	78.7277	50.8841	UBE2Q2	141.896	1.42405	1.5394	1.45565	0.68559	0.443118	1.23568
chrX	101407849	101407999	GLA	101	-	48.9726	94.1978	75.3782	96.7108	47.2366	27.5622	GLA	112.411	1.92348	1.53919	1.97479	0.964552	0.562809	2.29539
chr17	35432431	35432581	SLFN12	50	-	37.7145	109.269	58.0345	41.7886	41.9881	23.3219	SLFN12	57.1268	2.89727	1.53878	1.10802	1.11331	0.61838	1.51472
chr11	7987273	7987423	EIF3F	290	+	117.084	207.989	180.107	222.077	149.583	125.09	EIF3F	252.464	1.77641	1.53827	1.89673	1.27757	1.06838	2.15626
chr5	148826547	148826697	ADRB2	144	+	72.0516	107.009	110.733	95.5169	70.855	65.7252	ADRB2	123.468	1.48517	1.53686	1.32567	0.983392	0.912196	1.71361
chr8	145052378	145052528	C8orf33	139	+	75.9919	100.98	116.736	99.0988	78.7277	65.7252	C8orf33	106.882	1.32883	1.53616	1.30407	1.036	0.864897	1.40649
chr14	90331905	90332055	NRDE2	47	-	30.3968	50.49	46.6944	66.8618	47.2366	23.3219	NRDE2	46.07	1.66103	1.53616	2.19963	1.554	0.767249	1.51562
chr22	41468602	41468752	PHF5A	124	-	55.1645	76.8654	84.7171	74.0256	52.4852	40.2832	PHF5A	116.096	1.39339	1.53572	1.34191	0.951431	0.730238	2.10454
chr1	27392569	27392719	GPR3	54	+	24.7677	29.3897	38.0226	97.9048	68.2307	33.9227	GPR3	57.1268	1.18661	1.53517	3.95292	2.75483	1.36963	2.3065
chr2	43637234	43637384	PLEKHH2	74	+	133.408	162.02	204.788	187.452	62.9822	57.2446	PLEKHH2	97.6684	1.21447	1.53505	1.4051	0.472102	0.429094	0.732103
chr6	35688840	35688990	FKBP5	530	-	171.685	245.668	263.49	259.09	223.062	186.575	FKBP5	274.577	1.43092	1.53473	1.5091	1.29925	1.08673	1.59931
chr4	1684202	1684352	FAM53A	84	-	72.6145	103.241	111.4	132.53	141.71	93.2874	FAM53A	151.11	1.42177	1.53413	1.82512	1.95154	1.28469	2.08099
chr14	24115209	24115359	DCAF11	65	+	9.56935	16.5788	14.6754	16.7155	41.9881	10.6008	DCAF11	22.1136	1.73249	1.53358	1.74677	4.38777	1.10779	2.31088
chr3	53161150	53161300	PRKCD	129	+	81.058	77.619	124.074	176.706	120.716	108.129	PRKCD	134.524	0.957574	1.53068	2.17999	1.48925	1.33397	1.6596
chr3	186930456	186930606	ST6GAL1	68	+	17.45	14.3181	26.6825	17.9094	31.4911	29.6824	ST6GAL1	44.2272	0.820521	1.52908	1.02633	1.80465	1.701	2.53451
chr19	55599183	55599333	ZNF524	78	+	21.3903	28.6361	32.6861	54.9222	62.9822	31.8025	ZNF524	79.2404	1.33874	1.52808	2.56762	2.94443	1.48677	3.7045
chr9	126804965	126805115	ZBTB43	213	+	113.143	182.367	172.769	175.512	115.467	116.609	ZBTB43	219.293	1.61183	1.527	1.55124	1.02054	1.03063	1.93819
chr19	34677648	34677798	ZNF302	293	+	124.964	180.106	190.78	202.973	115.467	110.249	ZNF302	239.564	1.44126	1.52668	1.62425	0.924002	0.882246	1.91706
chr22	21735701	21735851	YPEL1	63	-	60.7935	92.6906	92.7218	103.875	76.1035	57.2446	YPEL1	130.839	1.52468	1.52519	1.70865	1.25184	0.941624	2.15219
chr6	96837420	96837570	GPR63	29	-	19.7016	39.9399	30.0179	40.5947	34.1153	12.721	GPR63	38.6988	2.02724	1.52363	2.06048	1.7316	0.645684	1.96425
chr9	113150937	113151087	SLC31A2	174	+	153.673	244.161	234.139	273.417	141.71	103.888	SLC31A2	173.223	1.58883	1.52362	1.77921	0.922153	0.676033	1.12722
chr1	7704684	7704834	CAMTA1	49	+	3.94032	4.52149	6.00357	17.9094	15.7455	25.442	CAMTA1	11.0568	1.14749	1.52362	4.54516	3.996	6.45684	2.80607
chr17	7583776	7583926	MPDU1	189	+	69.2371	135.645	105.396	146.857	115.467	69.9656	MPDU1	189.808	1.95914	1.52225	2.12107	1.6677	1.01052	2.74142
chr7	73433710	73433860	FZD9	52	+	41.6548	45.2149	63.371	58.5041	23.6183	50.8841	FZD9	58.9696	1.08547	1.52134	1.4045	0.567001	1.22157	1.41567
chr6	28259242	28259392	NKAPL	121	+	37.7145	52.7508	57.3675	78.8014	55.1094	44.5236	NKAPL	51.5984	1.39869	1.5211	2.08942	1.46123	1.18054	1.36813
chr14	68979221	68979371	ACTN1	885	-	396.284	620.952	602.358	466.839	338.529	262.901	ACTN1	576.796	1.56694	1.52002	1.17804	0.854259	0.663416	1.45551
chr19	11538767	11538917	CNN1	46	+	25.8935	76.1118	39.3567	54.9222	31.4911	16.9614	CNN1	31.3276	2.93942	1.51995	2.12108	1.21618	0.655045	1.20986
chr1	145927382	145927532	RBM8A	194	-	121.587	171.063	184.777	163.573	83.9762	65.7252	RBM8A	158.481	1.40692	1.51971	1.34532	0.690668	0.540561	1.30344
chr8	41529182	41529332	GINS4	100	+	47.8468	68.576	72.7099	118.202	62.9822	48.7639	GINS4	77.3976	1.43324	1.51964	2.47043	1.31633	1.01917	1.61761
chrX	101550493	101550643	ARMCX1	145	+	109.766	232.103	166.766	140.887	102.346	74.2059	ARMCX1	138.21	2.11453	1.51929	1.28352	0.932402	0.676037	1.25913
chr1	36386460	36386610	STK40	171	-	79.9322	168.802	121.406	100.293	97.0975	57.2446	STK40	84.7688	2.11181	1.51886	1.25473	1.21475	0.716164	1.06051
chr19	18606722	18606872	CRLF1	157	-	18.0129	13.5645	27.3496	44.1766	57.7337	59.3647	CRLF1	29.4848	0.753044	1.51833	2.4525	3.20513	3.29568	1.63687
chr10	124801752	124801902	ABRAXAS2	284	+	106.389	166.542	161.429	168.348	131.213	91.1673	ABRAXAS2	199.022	1.56541	1.51735	1.58238	1.23333	0.856924	1.8707
chr5	116084950	116085100	COMMD10	69	+	60.2306	106.255	91.3877	65.6678	70.855	33.9227	COMMD10	70.0264	1.76414	1.5173	1.09027	1.1764	0.563214	1.16264
chr9	89311124	89311274	CKS2	720	+	218.969	322.533	332.198	335.503	220.438	209.897	CKS2	414.63	1.47296	1.5171	1.53219	1.00671	0.958569	1.89356
chr1	236795238	236795388	MTR	382	+	140.726	187.642	213.46	163.573	131.213	142.051	MTR	211.922	1.33339	1.51685	1.16235	0.932401	1.00942	1.50592
chr6	26365163	26365313	BTN3A2	22	+	14.0726	48.2293	21.346	14.3275	7.87277	6.36051	BTN3A2	18.428	3.42718	1.51685	1.01811	0.55944	0.451978	1.3095
chr19	38336418	38336568	CATSPERG	27	+	14.0726	32.404	21.346	33.4309	15.7455	14.8412	CATSPERG	42.3844	2.30263	1.51685	2.3756	1.11888	1.05462	3.01184
chr19	39391025	39391175	PAF1	135	-	80.4951	125.848	122.073	93.1289	97.0975	57.2446	PAF1	103.197	1.56342	1.51653	1.15695	1.20625	0.711156	1.28203
chr5	16465718	16465868	ZNF622	357	-	132.845	202.714	201.453	134.918	133.837	95.4076	ZNF622	206.394	1.52594	1.51645	1.0156	1.00747	0.718187	1.55365
chr16	1943125	1943275	MSRB1	394	-	169.434	281.84	256.819	273.417	175.825	120.85	MSRB1	300.376	1.66342	1.51575	1.61371	1.03772	0.713257	1.77282
chr15	65133734	65133884	PDCD7	239	-	143.54	195.178	217.463	194.616	125.964	97.5278	PDCD7	197.18	1.35975	1.515	1.35583	0.877553	0.679447	1.37369
chr12	119178849	119178999	HSPB8	184	+	74.8661	152.977	113.401	145.663	68.2307	55.1244	HSPB8	110.568	2.04334	1.51472	1.94565	0.91137	0.736307	1.47688
chr9	133417916	133418066	REXO4	123	-	40.529	72.3439	61.3698	60.892	60.3579	40.2832	REXO4	71.8692	1.78499	1.51422	1.50243	1.48925	0.993935	1.77328
chr5	133968535	133968685	C5orf15	205	-	137.911	233.611	208.791	201.779	149.583	152.652	C5orf15	237.721	1.69393	1.51395	1.46311	1.08463	1.10689	1.72373
chr19	19821663	19821813	ZNF506	209	-	123.839	168.049	187.445	158.797	104.97	50.8841	ZNF506	184.28	1.357	1.51362	1.28229	0.847633	0.410889	1.48806
chr1	203795560	203795710	ZBED6	107	+	56.8532	66.3152	86.0512	101.487	60.3579	50.8841	ZBED6	101.354	1.16643	1.51357	1.78507	1.06164	0.895009	1.78273
chr1	203795560	203795710	ZC3H11A	107	+	56.8532	66.3152	86.0512	101.487	60.3579	50.8841	ZC3H11A	101.354	1.16643	1.51357	1.78507	1.06164	0.895009	1.78273
chr9	129752959	129753109	PTGES	204	-	89.5016	154.484	135.414	154.021	102.346	76.3261	PTGES	199.022	1.72605	1.51298	1.72087	1.14351	0.85279	2.22367
chr10	30349205	30349355	MTPAP	64	-	26.4564	36.9255	40.0238	37.0128	44.6124	16.9614	MTPAP	60.8124	1.39571	1.51282	1.39901	1.68626	0.641108	2.29859
chr11	65122092	65122242	FAU	412	-	138.474	194.424	209.458	239.986	146.958	165.373	FAU	281.948	1.40405	1.51262	1.73308	1.06127	1.19425	2.03611
chr3	49120717	49120867	USP19	272	-	154.798	223.814	234.139	238.792	160.08	135.691	USP19	239.564	1.44585	1.51255	1.5426	1.03412	0.876568	1.54759
chr11	34357933	34358083	ABTB2	1294	-	750.35	1311.99	1134.67	685.334	435.627	354.068	ABTB2	816.36	1.7485	1.51219	0.913352	0.580565	0.47187	1.08797
chr1	34165130	34165280	CSMD2	74	-	48.9726	80.6333	74.044	71.6377	34.1153	29.6824	CSMD2	70.0264	1.6465	1.51195	1.46281	0.69662	0.606102	1.42991
chr6	27808111	27808261	HIST1H2AI	807	+	175.626	336.098	265.491	273.417	278.171	195.056	HIST1H2AI	560.211	1.91371	1.51168	1.55681	1.58388	1.11063	3.1898
chr16	3305306	3305456	TIGD7	98	-	38.8403	43.7078	58.7016	72.8316	39.3639	61.4849	TIGD7	71.8692	1.12532	1.51136	1.87516	1.01348	1.58302	1.85038
chrX	153724777	153724927	ABCD1	64	+	73.7403	93.4442	111.4	82.3833	81.352	46.6437	ABCD1	110.568	1.26721	1.51071	1.11721	1.10322	0.63254	1.49942
chr1	61725054	61725204	TM2D1	571	-	391.78	529.768	591.685	595.786	338.529	233.219	TM2D1	591.539	1.35221	1.51025	1.52072	0.864079	0.595281	1.50988
chr19	45692612	45692762	QPCTL	278	+	110.892	158.252	167.433	282.969	175.825	106.008	QPCTL	293.005	1.42708	1.50987	2.55175	1.58555	0.955957	2.64226
chr14	21269348	21269498	HNRNPC	518	-	303.968	509.422	458.94	282.969	199.444	173.854	HNRNPC	331.704	1.67591	1.50983	0.930917	0.656135	0.571948	1.09125
chr11	22829738	22829888	SVIP	260	-	94.5677	131.123	142.752	193.422	133.837	86.9269	SVIP	200.865	1.38655	1.50952	2.04533	1.41525	0.919203	2.12403
chr7	56034090	56034240	PSPH	291	-	47.2838	82.1405	71.3758	50.1464	120.716	82.6866	PSPH	121.625	1.73718	1.50952	1.06054	2.55301	1.74873	2.57223
chr11	65111800	65111950	TM7SF2	128	+	96.8193	155.238	146.087	128.948	86.6005	59.3647	TM7SF2	195.337	1.60338	1.50886	1.33184	0.894455	0.613149	2.01754
chr1	40508700	40508850	EXO5	166	+	103.011	140.92	155.426	167.155	104.97	59.3647	EXO5	162.166	1.36801	1.50883	1.62269	1.01902	0.576295	1.57426
chr9	96619760	96619910	CDC14B	47	-	18.5758	22.6075	28.0167	40.5947	28.8668	40.2832	CDC14B	49.7556	1.21704	1.50824	2.18535	1.554	2.16858	2.67852
chr14	74018477	74018627	BBOF1	44	+	6.19193	17.3324	9.33889	21.4913	15.7455	23.3219	BBOF1	18.428	2.79919	1.50824	3.47086	2.54291	3.7665	2.97613
chr19	48364412	48364562	SYNGR4	41	+	6.19193	10.5502	9.33889	29.849	31.4911	10.6008	SYNGR4	49.7556	1.70386	1.50824	4.82063	5.08583	1.71203	8.03556
chr12	94650467	94650617	TMCC3	33	-	6.19193	6.78224	9.33889	27.4611	41.9881	21.2017	TMCC3	25.7992	1.09534	1.50824	4.43498	6.7811	3.42409	4.16658
chr2	238426903	238427053	ASB1	121	+	49.5355	64.8081	74.7111	81.1893	65.6064	46.6437	ASB1	101.354	1.30832	1.50823	1.63901	1.32443	0.941622	2.04609
chr12	89525936	89526086	POC1B	44	-	37.1516	42.9542	56.0333	72.8316	36.7396	27.5622	POC1B	66.3408	1.15619	1.50823	1.96039	0.98891	0.741885	1.78568
chr12	89525936	89526086	POC1B-GALNT4	44	-	37.1516	42.9542	56.0333	72.8316	36.7396	27.5622	POC1B-GALNT4	66.3408	1.15619	1.50823	1.96039	0.98891	0.741885	1.78568
chr14	73537720	73537870	HEATR4	127	-	12.3839	16.5788	18.6778	45.3705	73.4792	59.3647	HEATR4	42.3844	1.33874	1.50823	3.66367	5.93345	4.7937	3.42254
chr10	84139477	84139627	GHITM	299	+	118.21	182.367	178.106	161.185	112.843	142.051	GHITM	259.835	1.54274	1.50669	1.36355	0.954598	1.20168	2.19808
chr9	34376813	34376963	MYORG	68	-	47.8468	69.3296	72.0429	78.8014	28.8668	44.5236	MYORG	62.6552	1.44899	1.5057	1.64695	0.603317	0.930545	1.3095
chr2	233854432	233854582	HJURP	19	-	20.8274	29.3897	31.352	48.9524	18.3698	4.24034	HJURP	20.2708	1.41111	1.50532	2.35038	0.882002	0.203594	0.973276
chr2	111898537	111898687	MERTK	29	+	35.4629	51.9972	53.3651	83.5773	28.8668	38.163	MERTK	90.2972	1.46624	1.50481	2.35675	0.814	1.07614	2.54624
chr10	92240632	92240782	CPEB3	87	-	117.084	281.086	176.105	85.9652	39.3639	23.3219	CPEB3	64.498	2.40072	1.50409	0.734218	0.336202	0.199189	0.550869
chr22	18077921	18078071	PEX26	92	+	58.5419	86.662	88.0524	120.59	57.7337	48.7639	PEX26	130.839	1.48034	1.50409	2.05989	0.986195	0.832974	2.23496
chr4	37686289	37686439	RELL1	140	-	212.214	260.739	318.856	232.822	167.952	114.489	RELL1	257.992	1.22866	1.50252	1.09711	0.791428	0.539498	1.21572
chr13	80341052	80341202	SPRY2	187	-	82.1838	73.8511	123.407	279.387	97.0975	99.648	SPRY2	324.333	0.898609	1.5016	3.39954	1.18147	1.2125	3.94643
chr1	212858204	212858354	FLVCR1	190	+	99.0709	143.181	148.755	152.827	110.219	78.4463	FLVCR1	204.551	1.44524	1.5015	1.5426	1.11253	0.79182	2.06469
chr6	3157469	3157619	TUBB2A	2408	-	822.964	1385.08	1235.4	760.553	467.118	385.871	TUBB2A	807.146	1.68304	1.50116	0.924163	0.567604	0.46888	0.980779
chr13	40771094	40771244	MRPS31	319	-	109.766	163.527	164.765	128.948	110.219	67.8454	MRPS31	171.38	1.48978	1.50106	1.17475	1.00413	0.618091	1.56132
chr7	87876230	87876380	SLC25A40	103	-	59.1048	101.734	88.7194	45.3705	49.8609	40.2832	SLC25A40	81.0832	1.72125	1.50105	0.767628	0.843602	0.681555	1.37185
chr2	183124357	183124507	NUP35	90	+	33.7742	57.2723	50.6968	62.086	44.6124	46.6437	NUP35	88.4544	1.69574	1.50105	1.83827	1.3209	1.38105	2.61899
chr18	2570891	2571041	NDC80	33	+	16.8871	47.4757	25.3484	19.1034	23.6183	4.24034	NDC80	18.428	2.81136	1.50105	1.13124	1.3986	0.251099	1.09125
chr4	56978833	56978983	POLR2B	168	+	86.6871	122.834	130.077	122.978	89.2248	53.0042	POLR2B	130.839	1.41698	1.50053	1.41864	1.02927	0.611443	1.50932
chr14	75176524	75176674	TMED10	170	-	80.4951	109.269	120.738	114.62	68.2307	76.3261	TMED10	152.952	1.35746	1.49994	1.42394	0.847638	0.948208	1.90014
chr21	36385343	36385493	CHAF1B	61	+	38.2774	54.2579	57.3675	100.293	107.595	65.7252	CHAF1B	97.6684	1.41749	1.49873	2.62016	2.81093	1.71708	2.55159
chrX	120604029	120604179	MCTS1	136	+	68.1113	127.355	102.061	99.0988	83.9762	33.9227	MCTS1	117.939	1.86981	1.49844	1.45495	1.23293	0.498048	1.73156
chr10	125823482	125823632	BCCIP	187	+	70.3629	116.805	105.396	134.918	91.849	106.008	BCCIP	165.852	1.66004	1.49789	1.91746	1.30536	1.50659	2.35709
chrX	53422248	53422398	RIBC1	32	+	10.6952	18.8396	16.0095	23.8792	10.497	4.24034	RIBC1	33.1704	1.7615	1.49689	2.2327	0.981468	0.396471	3.10143
chr2	85616124	85616274	USP39	306	+	184.632	207.989	276.164	291.326	162.704	180.214	USP39	291.162	1.12651	1.49575	1.57787	0.881234	0.976071	1.57699
chr19	12610719	12610869	ZNF490	282	-	128.905	181.613	192.781	122.978	65.6064	95.4076	ZNF490	171.38	1.40889	1.49553	0.95402	0.508952	0.740139	1.32951
chr19	38899912	38900062	NFKBIB	99	+	83.8725	100.226	125.408	115.814	73.4792	42.4034	NFKBIB	108.725	1.19498	1.49522	1.38083	0.876082	0.50557	1.29631
chr13	111114522	111114672	ARHGEF7	249	+	60.2306	81.3869	90.0536	85.9652	81.352	59.3647	ARHGEF7	116.096	1.35126	1.49515	1.42727	1.35068	0.985624	1.92753
chr11	66638623	66638773	RBM4	424	+	193.639	300.679	289.506	205.361	183.698	133.571	RBM4	328.018	1.55278	1.49508	1.06054	0.948662	0.689794	1.69397
chr5	133026465	133026615	ZCCHC10	285	-	215.592	332.33	322.192	354.606	249.304	133.571	ZCCHC10	390.674	1.54148	1.49445	1.6448	1.15637	0.619555	1.8121
chr1	22710766	22710916	EPHB2	200	+	114.269	162.02	170.768	131.336	73.4792	89.0471	EPHB2	180.594	1.41788	1.49444	1.14936	0.643037	0.779276	1.58043
chr4	158768967	158769117	FNIP2	455	+	304.53	450.642	454.937	425.05	280.796	216.257	FNIP2	464.386	1.4798	1.4939	1.39576	0.922064	0.710134	1.52493
chr19	48110721	48110871	PLA2G4C	46	-	66.9855	137.152	100.06	79.9954	44.6124	21.2017	PLA2G4C	51.5984	2.04749	1.49376	1.19422	0.666001	0.316512	0.770292
chr12	55927034	55927184	PYM1	119	-	66.9855	103.241	100.06	84.7712	65.6064	69.9656	PYM1	99.5112	1.54124	1.49376	1.26552	0.979412	1.04449	1.48556
chr4	119300525	119300675	C4orf3	215	-	143.54	259.986	214.127	238.792	123.34	78.4463	C4orf3	230.35	1.81124	1.49176	1.66359	0.859273	0.546512	1.60478
chr11	117178667	117178817	SIDT2	244	+	143.54	306.708	214.127	118.202	131.213	74.2059	SIDT2	180.594	2.13674	1.49176	0.823478	0.914121	0.51697	1.25814
chr1	35769880	35770030	CLSPN	131	-	84.9983	125.095	126.742	188.646	102.346	53.0042	CLSPN	239.564	1.47174	1.49111	2.21941	1.20409	0.623591	2.81846
chr1	11664137	11664287	FBXO6	35	+	34.9	100.98	52.0309	31.043	13.1213	12.721	FBXO6	42.3844	2.89341	1.49086	0.889484	0.375968	0.364499	1.21445
chr3	121834926	121835076	IQCB1	148	-	54.6016	91.1835	81.3817	93.1289	83.9762	84.8068	IQCB1	114.254	1.66998	1.49046	1.70561	1.53798	1.55319	2.0925
chr2	203535226	203535376	RAPH1	169	-	37.1516	51.9972	55.3663	87.1591	86.6005	101.768	RAPH1	121.625	1.3996	1.49028	2.34604	2.331	2.73926	3.27375
chr2	24123229	24123379	PFN4	157	-	76.5548	86.662	114.068	158.797	94.4733	106.008	PFN4	143.738	1.13203	1.49002	2.07429	1.23406	1.38473	1.87758
chr16	29454467	29454617	SLX1B	480	+	414.297	529.768	617.034	630.411	412.008	377.39	SLX1B	641.294	1.27872	1.48935	1.52164	0.994475	0.910917	1.54791
chr18	74496288	74496438	CNDP2	73	+	41.6548	58.0258	62.0369	79.9954	52.4852	53.0042	CNDP2	86.6116	1.39302	1.48931	1.92044	1.26	1.27246	2.07927
chr16	31873729	31873879	ZNF267	514	+	276.385	440.092	411.578	421.468	165.328	142.051	ZNF267	436.744	1.59232	1.48915	1.52493	0.59818	0.513961	1.5802
chr1	26529689	26529839	RPS6KA1	65	+	24.2048	32.404	36.0214	78.8014	49.8609	65.7252	RPS6KA1	71.8692	1.33874	1.48819	3.25561	2.05996	2.71538	2.96921
chr2	74198544	74198694	MTHFD2	466	+	271.319	332.33	403.573	376.098	632.446	517.321	MTHFD2	549.154	1.22487	1.48745	1.38618	2.33101	1.90669	2.02402
chr10	988380	988530	GTPBP4	225	+	92.879	119.82	138.082	149.245	104.97	86.9269	GTPBP4	171.38	1.29007	1.48669	1.60688	1.13018	0.935916	1.8452
chr1	149888142	149888292	BOLA1	401	+	104.137	166.542	154.759	122.978	152.207	125.09	BOLA1	167.695	1.59926	1.48611	1.18093	1.4616	1.20121	1.61033
chr16	1826735	1826885	HAGH	185	-	77.6806	91.937	115.402	120.59	125.964	97.5278	HAGH	169.538	1.18353	1.4856	1.55238	1.62156	1.2555	2.1825
chr1	117605976	117606126	TENT5C	197	+	218.406	324.04	324.193	235.21	157.455	108.129	TENT5C	141.896	1.48366	1.48436	1.07694	0.720928	0.495083	0.649689
chr9	35072543	35072693	VCP	450	-	338.868	443.86	502.966	352.218	267.674	231.098	VCP	451.486	1.30983	1.48425	1.0394	0.789906	0.681971	1.33234
chr11	110296535	110296685	RDX	282	-	138.474	220.8	205.456	143.275	104.97	74.2059	RDX	180.594	1.59452	1.48372	1.03467	0.758048	0.535883	1.30417
chr16	74666791	74666941	RFWD3	187	-	82.7467	128.109	122.74	148.051	112.843	82.6866	RFWD3	180.594	1.54821	1.48332	1.78921	1.36372	0.999274	2.18249
chr19	10271043	10271193	ICAM1	171	+	118.773	253.204	176.105	143.275	99.7218	101.768	ICAM1	160.324	2.13183	1.4827	1.20629	0.8396	0.856828	1.34984
chr16	30193810	30193960	SLX1A	475	+	432.309	525.247	640.381	605.338	406.76	324.386	SLX1A	604.438	1.21498	1.4813	1.40024	0.940901	0.750357	1.39816
chr2	95121898	95122048	MRPS5	82	-	60.7935	76.8654	90.0536	158.797	89.2248	61.4849	MRPS5	73.712	1.26437	1.4813	2.61207	1.46767	1.01137	1.2125
chr15	70892336	70892486	THAP10	67	-	22.5161	33.1576	33.3532	39.4007	41.9881	31.8025	THAP10	60.8124	1.47262	1.4813	1.74989	1.8648	1.41243	2.70084
chrX	8732077	8732227	ANOS1	26	-	20.2645	37.6791	30.0179	13.1336	18.3698	6.36051	ANOS1	22.1136	1.85936	1.4813	0.648109	0.906502	0.313875	1.09125
chr9	23826267	23826417	ELAVL2	41	-	18.0129	47.4757	26.6825	19.1034	26.2426	19.0815	ELAVL2	38.6988	2.63565	1.4813	1.06054	1.45688	1.05932	2.14839
chr12	113221011	113221161	IQCD	47	-	13.5097	33.1576	20.0119	21.4913	15.7455	16.9614	IQCD	27.642	2.45436	1.4813	1.59081	1.1655	1.2555	2.04609
chr12	57755032	57755182	MARCH9	39	+	13.5097	19.5931	20.0119	17.9094	18.3698	27.5622	MARCH9	35.0132	1.4503	1.4813	1.32567	1.35975	2.04018	2.59171
chr16	75116667	75116817	LDHD	35	-	2.25161	1.50716	3.33532	8.35773	18.3698	23.3219	LDHD	11.0568	0.66937	1.4813	3.71189	8.15852	10.3579	4.91062
chr4	48269751	48269901	TEC	105	-	202.082	295.404	298.844	408.335	236.183	120.85	TEC	302.219	1.4618	1.47883	2.02064	1.16875	0.598025	1.49553
chr11	65858103	65858253	CFL1	659	-	467.772	633.763	691.745	564.743	351.651	309.545	CFL1	626.552	1.35485	1.47881	1.2073	0.751757	0.661743	1.33944
chr6	110815790	110815940	CDK19	101	-	65.8596	107.762	97.3913	112.232	47.2366	48.7639	CDK19	71.8692	1.63624	1.47877	1.70411	0.717232	0.740422	1.09125
chr5	132963487	132963637	AFF4	613	-	376.582	545.594	556.331	481.166	272.923	279.862	AFF4	475.442	1.44881	1.47732	1.27772	0.724737	0.743164	1.26252
chr21	29024597	29024747	USP16	88	+	38.8403	49.7364	57.3675	63.2799	41.9881	33.9227	USP16	71.8692	1.28054	1.47701	1.62923	1.08104	0.873389	1.85038
chr20	2101775	2101925	STK35	87	+	34.3371	38.4327	50.6968	88.3531	68.2307	42.4034	STK35	143.738	1.11928	1.47644	2.57311	1.98708	1.23492	4.18608
chr12	26833128	26833278	ITPR2	131	-	121.587	186.888	179.44	201.779	146.958	93.2874	ITPR2	123.468	1.53707	1.47582	1.65954	1.20867	0.767248	1.01547
chr19	35648256	35648406	COX6B1	192	+	80.4951	118.312	118.737	127.754	94.4733	67.8454	COX6B1	158.481	1.4698	1.47508	1.5871	1.17365	0.842851	1.96883
chr14	81533752	81533902	SEL1L	152	-	80.4951	110.023	118.737	79.9954	70.855	86.9269	SEL1L	108.725	1.36683	1.47508	0.993792	0.88024	1.0799	1.3507
chr5	177311819	177311969	MXD3	40	-	48.4097	81.3869	71.3758	37.0128	18.3698	14.8412	MXD3	53.4412	1.68121	1.47441	0.764574	0.379465	0.306575	1.10394
chr4	109560204	109560354	MCUB	99	+	71.4887	144.688	105.396	101.487	83.9762	42.4034	MCUB	82.926	2.02393	1.4743	1.41962	1.17468	0.593148	1.15999
chr8	26577304	26577454	DPYSL2	108	+	43.9064	71.5903	64.7052	68.0558	91.849	65.7252	DPYSL2	101.354	1.63052	1.47371	1.55002	2.09193	1.49694	2.30841
chr10	96513827	96513977	TLL2	33	-	43.9064	70.8367	64.7052	46.5645	70.855	46.6437	TLL2	66.3408	1.61336	1.47371	1.06054	1.61377	1.06234	1.51096
chr13	44989494	44989644	GPALPP1	138	+	64.7338	116.052	95.3901	117.008	70.855	74.2059	GPALPP1	127.153	1.79276	1.47357	1.80753	1.09456	1.14632	1.96424
chr14	103334163	103334313	EIF5	1404	+	494.792	772.422	729.1	580.265	409.384	324.386	EIF5	866.116	1.5611	1.47355	1.17275	0.827386	0.655601	1.75046
chr2	175005288	175005438	CHN1	103	-	55.7274	64.8081	82.0488	139.693	73.4792	61.4849	CHN1	134.524	1.16295	1.47232	2.50672	1.31855	1.10332	2.41397
chr1	150067256	150067406	VPS45	80	+	18.5758	34.6648	27.3496	45.3705	31.4911	31.8025	VPS45	53.4412	1.86613	1.47232	2.44245	1.69528	1.71204	2.87693
chr6	73310079	73310229	KHDC1	91	-	88.3758	120.573	130.077	121.784	47.2366	53.0042	KHDC1	97.6684	1.36432	1.47186	1.37802	0.534497	0.599759	1.10515
chr7	25125187	25125337	CYCS	243	-	151.421	238.886	222.799	155.215	99.7218	99.648	CYCS	230.35	1.57763	1.47139	1.02506	0.658573	0.658086	1.52126
chrX	51496489	51496639	NUDT11	40	-	28.1451	39.9399	41.3579	53.7282	34.1153	27.5622	NUDT11	33.1704	1.41907	1.46945	1.90897	1.21212	0.979289	1.17855
chr7	30028561	30028711	PLEKHA8	158	+	122.15	140.92	179.44	195.81	86.6005	97.5278	PLEKHA8	145.581	1.15366	1.46901	1.60303	0.708968	0.798427	1.19182
chr19	12919310	12919460	SYCE2	33	-	39.9661	73.8511	58.7016	88.3531	86.6005	84.8068	SYCE2	114.254	1.84784	1.46878	2.2107	2.16685	2.12197	2.85877
chr7	100081641	100081791	ZNF3	290	-	117.647	162.774	172.769	174.318	120.716	72.0858	ZNF3	217.45	1.38358	1.46854	1.4817	1.02609	0.61273	1.84833
chr6	26158052	26158202	HIST1H2BD	1287	+	563.466	894.502	827.159	765.329	590.458	428.274	HIST1H2BD	724.22	1.5875	1.46798	1.35825	1.0479	0.760071	1.28529
chr20	32819891	32820041	MAPRE1	144	+	68.6742	84.4012	100.727	119.396	78.7277	42.4034	MAPRE1	130.839	1.22901	1.46674	1.73859	1.14639	0.617458	1.90521
chr19	6393084	6393234	GTF2F1	106	-	75.9919	118.312	111.4	132.53	110.219	63.6051	GTF2F1	134.524	1.5569	1.46595	1.744	1.4504	0.836998	1.77024
chr3	154324394	154324544	DHX36	418	-	268.505	404.674	393.567	373.71	236.183	161.133	DHX36	322.49	1.50714	1.46577	1.39182	0.879622	0.600112	1.20106
chr19	12722548	12722698	TNPO2	63	-	30.9597	39.9399	45.3603	53.7282	34.1153	29.6824	TNPO2	42.3844	1.29006	1.46514	1.73542	1.10193	0.958743	1.36902
chr5	179698906	179699056	CANX	407	+	195.327	261.493	286.17	245.956	209.941	173.854	CANX	291.162	1.33874	1.46508	1.2592	1.07482	0.890066	1.49064
chr16	66925459	66925609	RRAD	87	-	50.0984	71.5903	73.377	112.232	68.2307	55.1244	RRAD	116.096	1.42899	1.46466	2.24023	1.36193	1.10032	2.31736
chr22	46267941	46268091	TTC38	224	+	186.321	366.241	272.829	211.331	136.461	103.888	TTC38	213.765	1.96565	1.4643	1.13423	0.732397	0.557575	1.14729
chr6	134174787	134174937	SGK1	912	-	544.89	1017.34	797.808	522.955	267.674	241.699	SGK1	558.368	1.86706	1.46416	0.959744	0.491244	0.443574	1.02474
chr12	111766877	111767027	ALDH2	157	+	47.8468	61.7937	70.0417	89.5471	133.837	99.648	ALDH2	149.267	1.29149	1.46387	1.87154	2.7972	2.08265	3.11969
chr3	14125788	14125938	CHCHD4	78	-	47.8468	56.5187	70.0417	39.4007	18.3698	36.0429	CHCHD4	40.5416	1.18124	1.46387	0.823476	0.38393	0.753298	0.847321
chr3	149812670	149812820	RNF13	233	+	155.924	198.192	228.136	206.555	133.837	112.369	RNF13	138.21	1.27108	1.46312	1.32472	0.858348	0.720665	0.886393
chr6	27893102	27893252	HIST1H2AM	1234	-	464.395	771.668	679.071	661.454	614.076	419.794	HIST1H2AM	1232.83	1.66166	1.46227	1.42433	1.32231	0.903959	2.6547
chr3	194672116	194672266	LSG1	206	-	60.2306	94.9514	88.0524	93.1289	62.9822	50.8841	LSG1	128.996	1.57646	1.46192	1.54621	1.04568	0.844821	2.1417
chr2	68252427	68252577	PPP3R1	410	-	339.993	433.31	496.962	382.067	217.813	239.579	PPP3R1	398.045	1.27447	1.46168	1.12375	0.64064	0.704659	1.17074
chr3	49104675	49104825	QARS	298	-	135.097	230.596	197.451	150.439	118.092	95.4076	QARS	156.638	1.70689	1.46155	1.11356	0.874127	0.706216	1.15945
chr11	33161401	33161551	CSTF3	135	-	41.0919	54.2579	60.0357	64.4739	65.6064	33.9227	CSTF3	62.6552	1.3204	1.46101	1.56902	1.59658	0.825533	1.52476
chr12	12813296	12813446	DDX47	148	+	72.6145	103.241	106.063	108.65	94.4733	93.2874	DDX47	138.21	1.42177	1.46063	1.49626	1.30103	1.28469	1.90334
chr3	44584825	44584975	ZNF660	47	+	48.4097	69.3296	70.7087	69.2497	20.9941	19.0815	ZNF660	53.4412	1.43214	1.46063	1.43049	0.433675	0.394167	1.10394
chr7	7640376	7640526	RPA3	174	-	63.0451	88.9227	92.0548	101.487	86.6005	86.9269	RPA3	134.524	1.41046	1.46014	1.60975	1.37363	1.37881	2.13377
chr15	90994454	90994604	PRC1	31	-	14.6355	18.8396	21.346	48.9524	26.2426	8.48068	PRC1	36.856	1.28725	1.45851	3.34477	1.79308	0.57946	2.51826
chr1	220690299	220690449	C1orf115	20	+	7.31774	6.78224	10.673	20.2973	5.24852	21.2017	C1orf115	16.5852	0.926822	1.45851	2.77371	0.717232	2.8973	2.26644
chr17	17496318	17496468	RASD1	1442	-	780.746	1373.03	1138.68	722.346	388.39	417.673	RASD1	877.173	1.75861	1.45845	0.9252	0.49746	0.534967	1.12351
chr7	56106394	56106544	CHCHD2	266	-	129.468	199.699	188.779	169.542	146.958	91.1673	CHCHD2	189.808	1.54246	1.45811	1.30953	1.13509	0.704169	1.46606
chrX	154019765	154019915	IRAK1	242	-	134.534	196.685	196.117	182.676	139.086	120.85	IRAK1	211.922	1.46197	1.45775	1.35784	1.03384	0.898286	1.57523
chr14	93184795	93184945	MOAP1	411	-	195.89	255.464	285.503	321.175	236.183	184.455	MOAP1	293.005	1.30412	1.45747	1.63957	1.20569	0.941625	1.49576
chr1	236281877	236282027	ERO1B	89	-	88.3758	113.791	128.743	111.038	76.1035	106.008	ERO1B	130.839	1.28758	1.45677	1.25643	0.861135	1.19951	1.48048
chr6	28124527	28124677	ZSCAN16	173	+	54.0387	70.0832	78.7135	97.9048	60.3579	53.0042	ZSCAN16	75.5548	1.29691	1.45661	1.81175	1.11694	0.980856	1.39816
chr10	60778431	60778581	CDK1	56	+	32.0855	42.9542	46.6944	89.5471	26.2426	27.5622	CDK1	58.9696	1.33874	1.45531	2.79089	0.817896	0.859024	1.83789
chr1	156338171	156338321	CCT3	252	-	145.792	165.035	212.126	199.391	202.068	137.811	CCT3	215.608	1.13199	1.45499	1.36764	1.386	0.945258	1.47887
chr13	51584422	51584572	WDFY2	189	+	101.323	191.41	147.421	150.439	110.219	118.729	WDFY2	173.223	1.88911	1.45496	1.48475	1.0878	1.17179	1.70961
chr4	41990469	41990619	SLC30A9	268	+	126.09	207.989	183.442	192.228	131.213	89.0471	SLC30A9	208.236	1.64953	1.45485	1.52453	1.04063	0.706219	1.65149
chr10	14878793	14878943	SUV39H2	289	+	69.2371	97.2121	100.727	117.008	97.0975	91.1673	SUV39H2	145.581	1.40405	1.45481	1.68996	1.40239	1.31674	2.10264
chr1	202341859	202342009	UBE2T	126	-	37.1516	64.8081	54.0321	83.5773	83.9762	40.2832	UBE2T	147.424	1.74442	1.45437	2.24963	2.26037	1.08429	3.96817
chr3	44762027	44762177	KIF15	29	+	12.3839	18.086	18.0107	34.6249	18.3698	10.6008	KIF15	53.4412	1.46044	1.45436	2.79596	1.48336	0.856015	4.31538
chr11	6926340	6926490	ZNF215	35	+	12.3839	23.3611	18.0107	26.2671	20.9941	4.24034	ZNF215	20.2708	1.88641	1.45436	2.12107	1.69527	0.342407	1.63687
chr1	149841123	149841273	HIST2H3C	448	-	151.421	318.765	220.131	314.012	191.571	150.532	HIST2H3C	519.67	2.10516	1.45377	2.07377	1.26515	0.994129	3.43195
chr4	129096087	129096237	C4orf33	23	+	34.9	114.545	50.6968	41.7886	26.2426	16.9614	C4orf33	31.3276	3.28209	1.45263	1.19738	0.751937	0.486	0.897639
chr1	35573250	35573400	TFAP2E	40	+	17.45	25.6218	25.3484	28.6551	10.497	16.9614	TFAP2E	23.9564	1.4683	1.45263	1.64213	0.601547	0.972	1.37286
chr17	76453082	76453232	UBE2O	195	-	114.832	168.802	166.766	112.232	89.2248	89.0471	UBE2O	219.293	1.46999	1.45226	0.977358	0.777003	0.775455	1.90969
chr19	21358941	21359091	ZNF738	117	+	57.4161	93.4442	83.3829	87.1591	62.9822	57.2446	ZNF738	108.725	1.62749	1.45226	1.51803	1.09694	0.997013	1.89363
chr11	46617495	46617645	ATG13	89	+	62.4822	93.4442	90.7206	66.8618	62.9822	67.8454	ATG13	64.498	1.49553	1.45194	1.07009	1.008	1.08584	1.03226
chr21	36069948	36070098	CBR1	980	+	489.726	774.683	710.423	532.507	328.032	233.219	CBR1	571.268	1.58187	1.45065	1.08736	0.669828	0.476223	1.16651
chr5	133051934	133052084	HSPA4	254	+	153.673	175.585	222.799	237.598	233.559	178.094	HSPA4	305.905	1.14259	1.44983	1.54613	1.51984	1.15892	1.99062
chr9	137205656	137205806	NDOR1	198	+	73.1774	79.8797	106.063	117.008	89.2248	53.0042	NDOR1	147.424	1.09159	1.4494	1.59896	1.21929	0.724325	2.01461
chr6	30213319	30213469	TRIM26	148	-	139.037	240.393	201.453	132.53	107.595	76.3261	TRIM26	184.28	1.72899	1.44892	0.9532	0.773859	0.548963	1.3254
chr19	45469400	45469550	FOSB	25	+	20.2645	30.8969	29.3508	29.849	10.497	10.6008	FOSB	23.9564	1.52468	1.44839	1.47297	0.517999	0.523122	1.18219
chr19	52897567	52897717	ZNF320	272	-	151.984	260.739	220.131	207.749	144.334	69.9656	ZNF320	228.507	1.71557	1.44838	1.36691	0.949666	0.460348	1.50349
chr20	36573528	36573678	TGIF2	67	+	35.4629	68.576	51.3639	63.2799	26.2426	53.0042	TGIF2	75.5548	1.93374	1.44838	1.7844	0.740002	1.49464	2.13053
chr20	36573528	36573678	TGIF2-RAB5IF	67	+	35.4629	68.576	51.3639	63.2799	26.2426	53.0042	TGIF2-RAB5IF	75.5548	1.93374	1.44838	1.7844	0.740002	1.49464	2.13053
chr3	197029741	197029891	MELTF	25	-	5.06613	6.02866	7.3377	17.9094	7.87277	8.48068	MELTF	14.7424	1.18999	1.44838	3.53512	1.554	1.674	2.90999
chr19	45507411	45507561	VASP	221	+	130.031	173.324	188.112	165.961	118.092	127.21	VASP	245.092	1.33294	1.44667	1.27632	0.908183	0.978305	1.88487
chr4	127965361	127965511	ABHD18	67	+	66.4225	91.1835	96.0571	82.3833	81.352	21.2017	ABHD18	86.6116	1.37278	1.44615	1.24029	1.22477	0.319195	1.30395
chr2	206159368	206159518	NDUFS1	268	-	120.461	169.556	174.104	181.482	123.34	95.4076	NDUFS1	210.079	1.40756	1.44531	1.50656	1.0239	0.792021	1.74396
chr11	123062058	123062208	HSPA8	752	-	374.33	483.046	540.988	478.778	343.778	392.231	HSPA8	554.683	1.29043	1.44522	1.27903	0.918382	1.04782	1.4818
chr9	21031553	21031703	HACD4	30	-	36.0258	54.2579	52.0309	69.2497	36.7396	25.442	HACD4	36.856	1.50608	1.44427	1.92223	1.01981	0.706216	1.02304
chr17	21284637	21284787	MAP2K3	666	+	458.766	771.668	662.394	496.688	278.171	262.901	MAP2K3	412.787	1.68205	1.44386	1.08266	0.606346	0.573061	0.899777
chr12	122078682	122078832	MLXIP	977	+	438.501	595.33	633.043	555.192	396.263	377.39	MLXIP	589.696	1.35765	1.44365	1.26611	0.903676	0.860637	1.3448
chr14	24334992	24335142	ADCY4	25	-	61.9193	88.1691	89.3865	42.9826	5.24852	10.6008	ADCY4	27.642	1.42394	1.4436	0.694171	0.0847639	0.171203	0.44642
chr15	81324067	81324217	STARD5	244	-	286.518	464.96	413.579	239.986	120.716	69.9656	STARD5	221.136	1.6228	1.44347	0.837595	0.421321	0.244193	0.771805
chr1	35079353	35079503	ZMYM1	91	+	43.9064	91.937	63.371	60.892	55.1094	33.9227	ZMYM1	75.5548	2.09393	1.44332	1.38686	1.25516	0.772614	1.72082
chr4	1793218	1793368	FGFR3	395	+	245.426	327.808	354.211	194.616	209.941	144.172	FGFR3	222.979	1.33567	1.44325	0.792972	0.855415	0.587436	0.908539
chr7	100158622	100158772	MAP11	475	-	201.519	250.943	290.84	304.46	196.819	152.652	MAP11	293.005	1.24526	1.44324	1.51083	0.976677	0.757507	1.45398
chr12	57694078	57694228	OS9	275	+	186.321	305.954	268.827	165.961	136.461	84.8068	OS9	217.45	1.64208	1.44282	0.890726	0.732397	0.455165	1.16707
chr18	35377234	35377384	ZNF396	153	-	38.8403	61.7937	56.0333	85.9652	57.7337	67.8454	ZNF396	82.926	1.59097	1.44266	2.2133	1.48644	1.74678	2.13505
chr3	27484304	27484454	SLC4A7	728	-	437.938	752.075	631.709	408.335	251.929	161.133	SLC4A7	372.246	1.71731	1.44246	0.932404	0.575262	0.367936	0.849997
chr5	160421790	160421940	PTTG1	53	+	59.6677	89.6763	86.0512	87.1591	57.7337	38.163	PTTG1	92.14	1.50293	1.44217	1.46074	0.967587	0.639592	1.54422
chr5	159263228	159263378	UBLCP1	223	+	127.216	189.903	183.442	194.616	99.7218	112.369	UBLCP1	228.507	1.49276	1.44197	1.52981	0.783878	0.883293	1.79621
chr1	150268913	150269063	APH1A	112	-	80.4951	110.777	116.069	124.172	81.352	61.4849	APH1A	141.896	1.3762	1.44194	1.5426	1.01065	0.763834	1.76279
chr12	50112146	50112296	COX14	187	+	124.964	149.963	180.107	152.827	110.219	69.9656	COX14	222.979	1.20005	1.44127	1.22297	0.882006	0.559886	1.78435
chr9	36572843	36572993	MELK	104	+	83.3096	138.659	120.071	154.021	91.849	53.0042	MELK	180.594	1.66438	1.44126	1.84878	1.1025	0.636232	2.16775
chr6	26216854	26217004	HIST1H2AE	1072	+	349	572.723	502.966	458.481	383.142	286.223	HIST1H2AE	482.814	1.64104	1.44116	1.3137	1.09783	0.820123	1.38342
chr1	37474505	37474655	ZC3H12A	1914	+	737.966	1036.18	1063.3	807.118	495.985	483.399	ZC3H12A	937.985	1.4041	1.44085	1.09371	0.672097	0.655042	1.27104
chr12	108561089	108561239	SART3	291	-	114.832	168.802	165.432	163.573	146.958	74.2059	SART3	219.293	1.46999	1.44064	1.42445	1.27977	0.646213	1.90969
chr4	25160345	25160495	SEPSECS	259	-	114.832	185.381	165.432	187.452	160.08	101.768	SEPSECS	204.551	1.61437	1.44064	1.6324	1.39404	0.886234	1.78131
chr3	84958914	84959064	CADM2	24	+	28.7081	45.9685	41.3579	19.1034	13.1213	10.6008	CADM2	35.0132	1.60124	1.44064	0.665436	0.457059	0.369262	1.21963
chr3	48188307	48188457	CDC25A	33	-	28.7081	37.6791	41.3579	82.3833	28.8668	21.2017	CDC25A	93.9828	1.31249	1.44064	2.86969	1.00553	0.738527	3.27374
chr11	104968487	104968637	CASP4	54	-	44.4693	130.37	64.0381	62.086	28.8668	12.721	CASP4	49.7556	2.93169	1.44005	1.39615	0.64914	0.286063	1.11888
chr2	99181102	99181252	MRPL30	199	+	99.6338	189.903	143.419	145.663	76.1035	44.5236	MRPL30	127.153	1.90601	1.43946	1.46198	0.763832	0.446872	1.2762
chr17	54900773	54900923	TOM1L1	80	+	31.5226	27.8825	45.3603	53.7282	44.6124	53.0042	TOM1L1	58.9696	0.884524	1.43898	1.70443	1.41525	1.68147	1.87071
chr6	18387369	18387519	RNF144B	29	+	7.88064	17.3324	11.3401	28.6551	7.87277	16.9614	RNF144B	14.7424	2.19936	1.43898	3.63614	0.999001	2.15229	1.87071
chr17	42824186	42824336	BECN1	282	-	184.069	265.261	264.824	251.926	173.201	99.648	BECN1	191.651	1.4411	1.43872	1.36865	0.940957	0.541362	1.04119
chr2	186486216	186486366	ZC3H15	189	+	108.077	137.906	155.426	179.094	139.086	82.6866	ZC3H15	204.551	1.276	1.4381	1.6571	1.28692	0.765071	1.89264
chr14	31026568	31026718	AP4S1	106	+	92.3161	152.224	132.746	131.336	76.1035	44.5236	AP4S1	132.682	1.64894	1.43795	1.42268	0.824379	0.482295	1.43726
chr21	46323768	46323918	C21orf58	140	-	60.7935	108.516	87.3853	136.112	99.7218	67.8454	C21orf58	189.808	1.78499	1.43741	2.23892	1.64034	1.116	3.12218
chr14	103057303	103057453	CDC42BPB	111	-	98.508	82.8941	141.417	161.185	89.2248	65.7252	CDC42BPB	119.782	0.841496	1.43559	1.63626	0.905762	0.667207	1.21596
chr4	139015701	139015851	NOCT	527	+	253.306	469.482	363.55	312.818	228.31	190.815	NOCT	350.132	1.85342	1.43522	1.23494	0.901321	0.753298	1.38225
chr18	21242165	21242315	GREB1L	138	+	61.3564	79.1261	88.0524	72.8316	44.6124	36.0429	GREB1L	75.5548	1.28961	1.4351	1.18703	0.727103	0.587435	1.23141
chr17	17694824	17694974	RAI1	352	+	264.564	388.848	379.559	294.908	209.941	146.292	RAI1	307.748	1.46977	1.43466	1.11469	0.793536	0.552955	1.16323
chr19	20776232	20776382	ZNF66	121	+	64.1709	86.662	92.0548	82.3833	49.8609	44.5236	ZNF66	97.6684	1.35049	1.43453	1.28381	0.777002	0.693829	1.522
chr1	160098553	160098703	IGSF8	31	-	42.7806	59.533	61.3698	56.1162	31.4911	21.2017	IGSF8	46.07	1.39159	1.43452	1.31172	0.736107	0.495591	1.07689
chrX	51332782	51332932	NUDT10	19	+	10.6952	15.8252	15.3425	13.1336	0	2.12017	NUDT10	7.3712	1.47965	1.43452	1.22799	0	0.198236	0.689206
chr17	13017905	13018055	ELAC2	200	-	56.2903	88.1691	80.7147	109.844	52.4852	65.7252	ELAC2	123.468	1.56633	1.4339	1.95138	0.932402	1.16761	2.19342
chr1	40979663	40979813	CTPS1	146	+	80.4951	100.226	115.402	131.336	136.461	101.768	CTPS1	211.922	1.24512	1.43365	1.6316	1.69527	1.26428	2.63273
chr11	62123944	62124094	INCENP	67	+	24.2048	37.6791	34.6873	41.7886	34.1153	25.442	INCENP	36.856	1.55668	1.43308	1.72646	1.40944	1.05111	1.52267
chr4	57110315	57110465	IGFBP7	151	-	110.329	143.934	158.094	170.736	183.698	116.609	IGFBP7	164.009	1.30459	1.43293	1.54752	1.665	1.05692	1.48654
chr4	48831019	48831169	OCIAD1	65	+	37.7145	47.4757	54.0321	50.1464	41.9881	44.5236	OCIAD1	53.4412	1.25882	1.43266	1.32963	1.11331	1.18054	1.41699
chr3	155854335	155854485	SLC33A1	327	-	126.653	211.003	181.441	154.021	120.716	165.373	SLC33A1	180.594	1.66599	1.43258	1.21609	0.953124	1.30572	1.4259
chr18	79069350	79069500	ATP9B	253	+	167.182	232.103	239.476	263.865	178.45	144.172	ATP9B	254.306	1.38833	1.43243	1.57831	1.0674	0.862366	1.52113
chr18	76822312	76822462	ZNF236	74	+	27.0193	30.8969	38.6897	64.4739	62.9822	44.5236	ZNF236	110.568	1.14351	1.43193	2.38622	2.33101	1.64784	4.09219
chr9	111484281	111484431	ECPAS	129	-	67.5484	97.2121	96.7242	101.487	65.6064	72.0858	ECPAS	95.8256	1.43915	1.43192	1.50243	0.97125	1.06717	1.41862
chr15	81000889	81001039	TLNRD1	447	+	233.042	277.318	333.532	274.611	133.837	137.811	TLNRD1	294.848	1.18999	1.43121	1.17838	0.574304	0.591357	1.26521
chr9	127397122	127397272	SLC2A8	271	+	192.513	281.086	275.497	219.689	146.958	135.691	SLC2A8	222.979	1.46009	1.43106	1.14116	0.763367	0.704841	1.15825
chr4	158723316	158723466	PPID	545	-	363.635	544.086	520.309	545.64	299.165	250.18	PPID	558.368	1.49624	1.43086	1.50052	0.822707	0.687998	1.53552
chr12	2794936	2795086	FKBP4	666	+	325.921	327.055	466.277	459.675	383.142	447.356	FKBP4	515.984	1.00348	1.43064	1.41039	1.17557	1.37259	1.58316
chr4	186191563	186191713	CYP4V2	75	+	78.8064	100.98	112.734	118.202	34.1153	38.163	CYP4V2	101.354	1.28137	1.43052	1.4999	0.4329	0.484263	1.28611
chr3	190513998	190514148	IL1RAP	62	+	78.8064	173.324	112.734	76.4135	39.3639	46.6437	IL1RAP	70.0264	2.19936	1.43052	0.969636	0.499501	0.591877	0.888588
chr13	72781827	72781977	DIS3	300	-	157.613	266.768	225.467	223.271	139.086	108.129	DIS3	257.992	1.69255	1.43051	1.41658	0.882453	0.686041	1.63687
chr18	12702607	12702757	CEP76	274	-	209.4	317.258	299.511	256.702	183.698	112.369	CEP76	252.464	1.51508	1.43033	1.22589	0.877259	0.536624	1.20565
chr1	155978471	155978621	ARHGEF2	146	-	81.6209	103.241	116.736	146.857	97.0975	76.3261	ARHGEF2	141.896	1.26488	1.43022	1.79926	1.18962	0.935129	1.73848
chr2	9951623	9951773	GRHL1	157	+	65.2967	116.052	93.3889	102.681	89.2248	86.9269	GRHL1	92.14	1.7773	1.43022	1.57253	1.36645	1.33126	1.4111
chr17	76501310	76501460	RHBDF2	103	-	68.1113	98.7193	97.3913	120.59	65.6064	74.2059	RHBDF2	121.625	1.44938	1.42988	1.77048	0.963223	1.08948	1.78568
chr17	42112629	42112779	DHX58	167	-	258.935	556.897	370.22	291.326	118.092	80.5664	DHX58	202.708	2.15072	1.42978	1.12509	0.456068	0.311145	0.782853
chr20	45416068	45416218	PIGT	443	+	280.889	394.877	401.572	360.576	249.304	190.815	PIGT	342.761	1.40581	1.42965	1.2837	0.887553	0.679325	1.22027
chr3	28349145	28349295	ZCWPW2	126	+	104.137	191.41	148.755	103.875	57.7337	48.7639	ZCWPW2	105.04	1.83806	1.42845	0.997484	0.554401	0.468267	1.00867
chr5	176610040	176610190	GPRIN1	88	-	63.0451	87.4155	90.0536	113.426	81.352	63.6051	GPRIN1	158.481	1.38656	1.4284	1.79912	1.29038	1.00888	2.51377
chr17	56834079	56834229	DGKE	87	+	65.8596	110.777	94.0559	139.693	83.9762	80.5664	DGKE	116.096	1.68202	1.42813	2.12107	1.27508	1.22331	1.76278
chr18	21612257	21612407	SNRPD1	243	+	104.7	130.37	149.422	158.797	139.086	95.4076	SNRPD1	213.765	1.24518	1.42714	1.51669	1.32842	0.911247	2.04169
chr16	21953283	21953433	UQCRC2	138	+	66.4225	101.734	94.723	114.62	99.7218	40.2832	UQCRC2	106.882	1.53162	1.42607	1.72562	1.50133	0.606469	1.60912
chr10	102854193	102854343	BORCS7	56	+	47.2838	72.3439	67.3734	69.2497	41.9881	21.2017	BORCS7	68.1836	1.52999	1.42487	1.46455	0.888002	0.448392	1.44201
chr10	102854193	102854343	BORCS7-ASMT	56	+	47.2838	72.3439	67.3734	69.2497	41.9881	21.2017	BORCS7-ASMT	68.1836	1.52999	1.42487	1.46455	0.888002	0.448392	1.44201
chr7	100177269	100177419	GPC2	98	-	47.2838	77.619	67.3734	51.3403	60.3579	53.0042	GPC2	121.625	1.64156	1.42487	1.08579	1.2765	1.12098	2.57223
chr19	4909429	4909579	UHRF1	175	+	61.3564	106.255	87.3853	163.573	110.219	78.4463	UHRF1	248.778	1.73177	1.42422	2.66595	1.79637	1.27853	4.05464
chr14	66508085	66508235	GPHN	99	+	69.8	101.734	99.3925	96.7108	60.3579	63.6051	GPHN	123.468	1.45751	1.42396	1.38554	0.864726	0.911248	1.76888
chr5	132294344	132294494	SLC22A4	148	+	75.429	85.9084	107.397	143.275	49.8609	50.8841	SLC22A4	128.996	1.13893	1.42382	1.89947	0.661031	0.674596	1.71016
chr7	1530660	1530810	MAFK	131	+	78.2435	120.573	111.4	78.8014	99.7218	116.609	MAFK	121.625	1.541	1.42376	1.00713	1.27451	1.49033	1.55444
chr19	21020589	21020739	ZNF430	127	+	78.2435	102.487	111.4	152.827	78.7277	38.163	ZNF430	130.839	1.30985	1.42376	1.95322	1.00619	0.487747	1.6722
chr7	5045824	5045974	RBAK	178	+	100.76	152.977	143.419	157.603	99.7218	110.249	RBAK	206.394	1.51823	1.42337	1.56414	0.989696	1.09417	2.04837
chr7	5045824	5045974	RBAK-RBAKDN	178	+	100.76	152.977	143.419	157.603	99.7218	110.249	RBAK-RBAKDN	206.394	1.51823	1.42337	1.56414	0.989696	1.09417	2.04837
chr8	97277847	97277997	TSPYL5	236	-	106.389	138.659	151.423	211.331	125.964	89.0471	TSPYL5	241.407	1.30332	1.4233	1.9864	1.18399	0.836995	2.2691
chr1	85580686	85580836	CCN1	708	+	478.468	718.918	680.405	581.459	362.148	368.909	CCN1	372.246	1.50254	1.42205	1.21525	0.756891	0.771021	0.777996
chr21	46286313	46286463	YBEY	290	+	154.798	227.582	220.131	232.822	238.807	146.292	YBEY	261.678	1.47019	1.42205	1.50404	1.5427	0.945051	1.69045
chr15	74614862	74615012	CLK3	105	+	30.9597	16.5788	44.0262	83.5773	76.1035	84.8068	CLK3	79.2404	0.535496	1.42205	2.69955	2.45815	2.73926	2.55947
chr16	12803777	12803927	CPPED1	94	-	30.9597	39.1863	44.0262	53.7282	49.8609	16.9614	CPPED1	95.8256	1.26572	1.42205	1.73542	1.61051	0.547854	3.09517
chr1	43358896	43359046	CDC20	24	+	14.0726	24.1146	20.0119	26.2671	7.87277	6.36051	CDC20	33.1704	1.71359	1.42205	1.86654	0.55944	0.451978	2.35709
chr3	141051291	141051441	SPSB4	26	+	2.81451	2.26075	4.00238	5.9698	2.62426	4.24034	SPSB4	9.214	0.803248	1.42205	2.12108	0.932404	1.5066	3.27375
chr14	51095985	51096135	TRIM9	23	-	11.2581	25.6218	16.0095	11.9396	10.497	0	TRIM9	16.5852	2.27585	1.42204	1.06053	0.932395	0	1.47318
chr19	5622703	5622853	SAFB2	433	-	459.892	724.946	653.722	346.249	194.195	144.172	SAFB2	342.761	1.57634	1.42147	0.752892	0.422262	0.313491	0.745308
chr2	152718549	152718699	ARL6IP6	177	+	115.958	181.613	164.765	159.991	81.352	110.249	ARL6IP6	197.18	1.5662	1.4209	1.37973	0.701564	0.950767	1.70044
chr1	32222346	32222496	EIF3I	110	+	62.4822	80.6333	88.7194	109.844	55.1094	72.0858	EIF3I	106.882	1.2905	1.41991	1.758	0.882002	1.1537	1.7106
chr17	81927615	81927765	MAFG	374	-	179.003	247.175	254.151	245.956	183.698	180.214	MAFG	326.176	1.38084	1.41981	1.37403	1.02623	1.00677	1.82218
chr11	66344992	66345142	BRMS1	268	-	287.643	420.499	408.243	436.99	278.171	203.536	BRMS1	460.7	1.46188	1.41927	1.51921	0.96707	0.707599	1.60164
chr17	80147043	80147193	EIF4A3	767	-	868.559	1295.41	1232.07	841.742	372.645	311.665	EIF4A3	904.815	1.49145	1.41852	0.969125	0.429038	0.35883	1.04174
chr16	4538696	4538846	CDIP1	291	-	105.826	168.049	150.089	113.426	65.6064	101.768	CDIP1	143.738	1.58797	1.41826	1.07182	0.619946	0.961654	1.35825
chr14	24147427	24147577	RNF31	207	+	63.0451	97.2121	89.3865	101.487	86.6005	63.6051	RNF31	134.524	1.54195	1.41782	1.60975	1.37363	1.00888	2.13377
chr2	240452745	240452895	GPC1	138	+	91.7532	97.2121	130.077	125.366	78.7277	86.9269	GPC1	164.009	1.0595	1.41768	1.36634	0.858038	0.947399	1.7875
chr2	61888521	61888671	CCT4	372	-	169.434	248.682	240.143	262.671	186.322	184.455	CCT4	291.162	1.46772	1.41732	1.55029	1.09967	1.08865	1.71844
chr21	29073561	29073711	CCT8	267	-	152.547	201.206	216.129	285.357	141.71	142.051	CCT8	248.778	1.31898	1.4168	1.87062	0.92896	0.931195	1.63083
chr5	115625938	115626088	TMED7	123	-	74.8661	89.6763	106.063	93.1289	76.1035	55.1244	TMED7	114.254	1.19782	1.4167	1.24394	1.01653	0.736307	1.52611
chr5	115625938	115626088	TMED7-TICAM2	123	-	74.8661	89.6763	106.063	93.1289	76.1035	55.1244	TMED7-TICAM2	114.254	1.19782	1.4167	1.24394	1.01653	0.736307	1.52611
chr6	81752610	81752760	TENT5A	179	-	217.843	488.321	308.183	245.956	165.328	103.888	TENT5A	252.464	2.24162	1.4147	1.12905	0.758932	0.476894	1.15893
chr21	6499154	6499304	U2AF1L5	107	-	78.8064	110.777	111.4	112.232	73.4792	61.4849	U2AF1L5	114.254	1.40569	1.41359	1.42415	0.932401	0.780202	1.44981
chr21	33542781	33542931	GART	296	-	178.44	286.361	252.15	210.137	131.213	129.33	GART	222.979	1.6048	1.41308	1.17763	0.735334	0.724781	1.2496
chr12	107093469	107093619	CRY1	274	-	152.547	175.585	215.461	205.361	152.207	133.571	CRY1	219.293	1.15102	1.41242	1.34621	0.997771	0.875606	1.43754
chr10	86521681	86521831	WAPL	67	-	41.0919	47.4757	58.0345	57.3101	41.9881	59.3647	WAPL	71.8692	1.15535	1.41231	1.39468	1.02181	1.44468	1.74899
chr19	57363479	57363629	TRAPPC2B	154	+	79.3693	110.023	112.067	118.202	78.7277	59.3647	TRAPPC2B	149.267	1.38622	1.41197	1.48927	0.991916	0.747955	1.88066
chr19	57363479	57363629	ZNF547	154	+	79.3693	110.023	112.067	118.202	78.7277	59.3647	ZNF547	149.267	1.38622	1.41197	1.48927	0.991916	0.747955	1.88066
chr8	94474971	94475121	RAD54B	69	-	38.2774	53.5043	54.0321	48.9524	31.4911	33.9227	RAD54B	70.0264	1.3978	1.41159	1.27889	0.822707	0.886233	1.82945
chr4	173370877	173371027	SAP30	662	+	867.996	1364.74	1224.73	982.63	553.718	284.103	SAP30	902.972	1.57229	1.41099	1.13207	0.637927	0.327309	1.0403
chr13	43879419	43879569	CCDC122	194	-	130.031	211.757	183.442	146.857	70.855	65.7252	CCDC122	105.04	1.62851	1.41076	1.1294	0.544909	0.505458	0.807807
chr2	74529857	74530007	HTRA2	80	+	35.4629	24.1146	50.0298	58.5041	36.7396	67.8454	HTRA2	57.1268	0.679995	1.41076	1.64973	1.036	1.91314	1.61089
chr10	119206880	119207030	GRK5	42	+	11.821	9.79657	16.6766	26.2671	18.3698	12.721	GRK5	23.9564	0.828743	1.41076	2.22207	1.554	1.07614	2.0266
chr15	59372788	59372938	MYO1E	176	-	136.223	219.292	192.114	134.918	78.7277	57.2446	MYO1E	151.11	1.6098	1.41029	0.99042	0.577933	0.420227	1.10928
chr19	41883142	41883292	ARHGEF1	194	+	139.6	130.37	196.784	299.684	173.201	120.85	ARHGEF1	254.306	0.933883	1.40963	2.14673	1.24069	0.865688	1.82168
chrX	41334092	41334242	DDX3X	377	+	249.929	373.777	352.209	353.412	246.68	161.133	DDX3X	409.102	1.49553	1.40924	1.41405	0.987	0.644715	1.63687
chr3	58306470	58306620	HTD2	164	+	110.329	170.31	155.426	164.767	102.346	86.9269	HTD2	202.708	1.54366	1.40875	1.49342	0.927644	0.787888	1.8373
chr3	58306470	58306620	RPP14	164	+	110.329	170.31	155.426	164.767	102.346	86.9269	RPP14	202.708	1.54366	1.40875	1.49342	0.927644	0.787888	1.8373
chr19	19668757	19668907	ZNF101	158	+	59.6677	82.1405	84.05	60.892	47.2366	46.6437	ZNF101	97.6684	1.37663	1.40863	1.02052	0.791661	0.781724	1.63687
chr1	8878610	8878760	ENO1	1046	-	428.369	521.479	603.025	718.764	396.263	307.425	ENO1	641.294	1.21736	1.40772	1.67791	0.925051	0.717664	1.49706
chr2	110472756	110472906	LIMS4	20	-	9.00645	42.2006	12.6742	13.1336	13.1213	8.48068	LIMS4	7.3712	4.6856	1.40724	1.45824	1.45688	0.941623	0.818436
chr1	100132844	100132994	SASS6	32	-	9.00645	15.0716	12.6742	20.2973	23.6183	16.9614	SASS6	20.2708	1.67342	1.40724	2.25364	2.62238	1.88325	2.2507
chr1	11273140	11273290	UBIAD1	237	+	183.506	263.754	258.154	249.538	181.074	116.609	UBIAD1	256.149	1.4373	1.40679	1.35984	0.986747	0.635451	1.39586
chr3	4493273	4493423	ITPR1	263	+	141.852	251.696	199.452	199.391	131.213	95.4076	ITPR1	147.424	1.77436	1.40606	1.40563	0.924999	0.672586	1.03928
chr6	41546334	41546484	FOXP4	185	+	105.826	125.848	148.755	122.978	89.2248	82.6866	FOXP4	152.952	1.1892	1.40566	1.16208	0.843127	0.781345	1.44532
chr10	73998043	73998193	VCL	866	+	378.834	654.109	532.317	391.619	215.189	207.777	VCL	482.814	1.72664	1.40515	1.03375	0.56803	0.548464	1.27447
chr9	136545971	136546121	NOTCH1	258	-	188.572	242.653	264.824	208.943	110.219	131.45	NOTCH1	213.765	1.28679	1.40437	1.10803	0.584493	0.697081	1.1336
chr12	6867460	6867610	TPI1	576	+	517.871	646.574	727.099	594.593	244.056	248.06	TPI1	503.084	1.24852	1.40402	1.14815	0.471268	0.479	0.971447
chr19	2476053	2476203	GADD45B	2285	+	1457.36	2614.18	2045.88	1405.29	842.387	653.012	GADD45B	1459.5	1.79378	1.40383	0.964271	0.578023	0.448079	1.00147
chr14	57268929	57269079	AP5M1	77	+	36.5887	53.5043	51.3639	63.2799	70.855	33.9227	AP5M1	60.8124	1.46232	1.40382	1.72949	1.93653	0.927136	1.66205
chr10	125895749	125895899	FANK1	56	+	36.5887	40.6934	51.3639	51.3403	23.6183	27.5622	FANK1	31.3276	1.11218	1.40382	1.40317	0.645508	0.753298	0.85621
chr1	109426350	109426500	PSMA5	234	-	95.1306	150.716	133.413	133.724	99.7218	65.7252	PSMA5	140.053	1.58431	1.40242	1.40569	1.04826	0.690894	1.47222
chr2	197453453	197453603	COQ10B	208	+	190.824	228.335	267.492	257.896	131.213	93.2874	COQ10B	261.678	1.19657	1.40177	1.35149	0.687613	0.488866	1.37131
chr12	101877633	101877783	DRAM1	72	+	52.35	61.0402	73.377	100.293	73.4792	63.6051	DRAM1	95.8256	1.166	1.40166	1.91582	1.40361	1.215	1.83048
chr4	112145362	112145512	FAM241A	174	+	129.468	238.886	181.441	191.034	186.322	173.854	FAM241A	189.808	1.84514	1.40144	1.47553	1.43914	1.34283	1.46606
chr9	34522908	34523058	ENHO	42	-	6.19193	7.53582	8.67182	20.2973	20.9941	33.9227	ENHO	53.4412	1.21704	1.4005	3.27802	3.39056	5.47853	8.63078
chr10	73167935	73168085	ECD	386	-	331.55	517.711	464.276	319.982	236.183	139.931	ECD	329.861	1.56149	1.40032	0.965109	0.71236	0.422051	0.994906
chr17	29294050	29294200	NUFIP2	1531	-	921.472	1491.34	1290.1	906.216	627.198	430.394	NUFIP2	985.898	1.61843	1.40004	0.983444	0.680648	0.467072	1.06992
chr3	180602124	180602274	TTC14	142	+	102.448	131.877	143.419	156.409	73.4792	99.648	TTC14	169.538	1.28726	1.39992	1.52672	0.717234	0.972669	1.65487
chr11	130069821	130069971	APLP2	902	+	516.182	834.969	722.43	490.718	267.674	205.656	APLP2	510.456	1.61759	1.39956	0.950669	0.518565	0.398418	0.988907
chr5	95646828	95646978	RFESD	240	+	203.771	336.851	284.836	273.417	131.213	91.1673	RFESD	230.35	1.65309	1.39782	1.34179	0.643924	0.447401	1.13044
chr19	12163014	12163164	ZNF136	84	+	37.7145	76.8654	52.698	46.5645	36.7396	29.6824	ZNF136	82.926	2.03809	1.39729	1.23466	0.974151	0.787029	2.19878
chr10	92689870	92690020	HHEX	225	+	91.1903	137.906	127.409	175.512	120.716	127.21	HHEX	187.966	1.51229	1.39718	1.92468	1.32378	1.39499	2.06125
chr10	11742352	11742502	ECHDC3	131	+	53.4758	52.7508	74.7111	78.8014	68.2307	46.6437	ECHDC3	117.939	0.986442	1.3971	1.47359	1.27592	0.872239	2.20546
chr8	116755737	116755887	EIF3H	194	-	97.9451	121.327	136.748	117.008	102.346	93.2874	EIF3H	178.752	1.23872	1.39617	1.19463	1.04493	0.952446	1.82502
chr4	118685338	118685488	METTL14	172	+	82.1838	136.398	114.735	120.59	57.7337	48.7639	METTL14	138.21	1.65967	1.39608	1.46732	0.702495	0.593352	1.68172
chr2	26244879	26245029	HADHB	172	+	162.116	250.189	226.135	219.689	152.207	97.5278	HADHB	204.551	1.54327	1.3949	1.35513	0.938877	0.601593	1.26176
chr1	33349820	33349970	PHC2	1031	-	649.027	913.342	905.205	878.755	548.47	443.115	PHC2	740.806	1.40725	1.39471	1.35396	0.845065	0.682737	1.14141
chr17	55264895	55265045	HLF	30	+	9.56935	13.5645	13.3413	9.55169	10.497	16.9614	HLF	12.8996	1.41749	1.39417	0.998155	1.09694	1.77247	1.34801
chr19	36054850	36055000	WDR62	29	+	19.1387	21.8539	26.6825	47.7584	31.4911	16.9614	WDR62	62.6552	1.14187	1.39416	2.49538	1.64541	0.886236	3.27374
chr17	7572754	7572904	EIF4A1	1784	+	775.68	1391.11	1081.31	810.699	501.233	375.27	EIF4A1	1059.61	1.79341	1.39402	1.04515	0.646185	0.483795	1.36604
chr17	34961356	34961506	CCT6B	238	-	131.156	171.063	182.775	157.603	120.716	82.6866	CCT6B	224.822	1.30427	1.39357	1.20165	0.9204	0.630445	1.71416
chr21	46286186	46286336	MCM3AP	261	-	153.673	199.699	214.127	222.077	128.589	116.609	MCM3AP	210.079	1.29951	1.39339	1.44513	0.83677	0.758813	1.36705
chr20	47501831	47501981	NCOA3	322	+	365.324	570.462	508.969	459.675	278.171	197.176	NCOA3	370.403	1.56152	1.3932	1.25827	0.761436	0.539729	1.0139
chr12	31959363	31959513	RESF1	356	+	176.752	299.926	246.146	182.676	115.467	78.4463	RESF1	226.664	1.69687	1.39261	1.03352	0.653271	0.443821	1.28238
chr1	151165833	151165983	LYSMD1	51	-	22.5161	33.9112	31.352	42.9826	28.8668	33.9227	LYSMD1	44.2272	1.50609	1.39243	1.90897	1.28205	1.5066	1.96425
chr3	160565483	160565633	KPNA4	508	-	177.314	241.146	246.813	293.714	152.207	137.811	KPNA4	272.734	1.35999	1.39195	1.65646	0.858404	0.777214	1.53814
chr17	80544775	80544925	RPTOR	130	+	35.4629	64.0545	49.3627	65.6678	57.7337	50.8841	RPTOR	46.07	1.80624	1.39195	1.85173	1.628	1.43485	1.2991
chrX	109733176	109733326	ACSL4	75	-	51.7871	69.3296	72.0429	63.2799	65.6064	46.6437	ACSL4	77.3976	1.33874	1.39114	1.22192	1.26685	0.900682	1.49453
chrX	129906085	129906235	UTP14A	90	+	38.8403	48.2293	54.0321	62.086	39.3639	50.8841	UTP14A	57.1268	1.24173	1.39113	1.59849	1.01348	1.31009	1.47081
chr3	66220944	66221094	SLC25A26	126	+	68.1113	103.994	94.723	107.456	83.9762	69.9656	SLC25A26	106.882	1.52682	1.39071	1.57765	1.23293	1.02722	1.56923
chr11	236905	237055	PSMD13	245	+	110.329	183.874	153.425	142.081	94.4733	103.888	PSMD13	186.123	1.6666	1.39061	1.28779	0.856287	0.94162	1.68698
chr12	77065476	77065626	E2F7	232	-	113.706	195.178	158.094	274.611	97.0975	89.0471	E2F7	256.149	1.71651	1.39038	2.4151	0.853935	0.783135	2.25273
chr7	73683526	73683676	BUD23	258	+	123.839	165.035	172.102	179.094	160.08	133.571	BUD23	208.236	1.33266	1.38972	1.44618	1.29265	1.07859	1.68151
chr16	67847115	67847265	NUTF2	157	+	52.35	55.7651	72.7099	74.0256	36.7396	59.3647	NUTF2	116.096	1.06524	1.38892	1.41405	0.701807	1.134	2.21769
chr17	7843656	7843806	KDM6B	81	+	36.0258	33.1576	50.0298	57.3101	52.4852	33.9227	KDM6B	53.4412	0.920385	1.38872	1.59081	1.45688	0.941622	1.48341
chr15	70097832	70097982	TLE3	264	-	127.779	199.699	177.439	198.198	167.952	182.335	TLE3	355.66	1.56285	1.38864	1.5511	1.31439	1.42696	2.7834
chr6	27865249	27865399	HIST1H2AL	522	+	167.182	303.694	232.138	191.034	131.213	103.888	HIST1H2AL	276.42	1.81655	1.38853	1.14267	0.784851	0.621407	1.65341
chr2	55617538	55617688	PPP4R3B	128	-	82.1838	142.427	114.068	83.5773	60.3579	55.1244	PPP4R3B	130.839	1.73303	1.38796	1.01696	0.734426	0.670745	1.59203
chr17	38428392	38428542	ARHGAP23	56	+	46.158	81.3869	64.0381	90.741	44.6124	46.6437	ARHGAP23	90.2972	1.76322	1.38737	1.96588	0.966515	1.01052	1.95626
chr7	140479403	140479553	MKRN1	98	-	49.5355	65.5617	68.7075	74.0256	31.4911	40.2832	MKRN1	71.8692	1.32353	1.38704	1.49439	0.635728	0.813219	1.45086
chr1	6199506	6199656	RPL22	174	-	89.5016	108.516	124.074	131.336	115.467	93.2874	RPL22	138.21	1.21245	1.38628	1.46742	1.29011	1.0423	1.54422
chr4	103198286	103198436	CENPE	45	-	36.5887	73.8511	50.6968	45.3705	34.1153	19.0815	CENPE	71.8692	2.01841	1.38559	1.24001	0.9324	0.521513	1.96425
chr2	227325188	227325338	MFF	190	+	126.653	196.685	175.438	205.361	125.964	110.249	MFF	184.28	1.55294	1.38519	1.62145	0.99456	0.870481	1.455
chr12	50763990	50764140	ATF1	153	+	66.9855	96.4585	92.7218	120.59	70.855	53.0042	ATF1	116.096	1.43999	1.38421	1.80024	1.05777	0.791279	1.73315
chr1	13583741	13583891	PDPN	58	+	77.1177	154.484	106.73	90.741	52.4852	23.3219	PDPN	49.7556	2.00322	1.38399	1.17666	0.680586	0.30242	0.64519
chr2	101308601	101308751	RNF149	282	-	225.161	377.545	311.519	308.042	181.074	171.734	RNF149	234.036	1.67678	1.38354	1.3681	0.804198	0.762716	1.03942
chr7	99408897	99409047	BUD31	194	+	158.176	185.381	218.797	183.87	144.334	125.09	BUD31	230.35	1.17199	1.38325	1.16244	0.91249	0.790828	1.45629
chr1	114757909	114758059	CSDE1	110	-	77.6806	105.502	107.397	142.081	57.7337	86.9269	CSDE1	164.009	1.35815	1.38255	1.82904	0.743219	1.11903	2.11133
chrX	101408163	101408313	HNRNPH2	89	+	47.2838	59.533	65.3722	60.892	41.9881	46.6437	HNRNPH2	103.197	1.25906	1.38255	1.2878	0.888002	0.986463	2.1825
chr1	151070520	151070670	GABPB2	46	+	30.3968	48.2293	42.025	45.3705	20.9941	16.9614	GABPB2	38.6988	1.58666	1.38255	1.49261	0.690668	0.558	1.27312
chr1	169367696	169367846	NME7	21	-	16.8871	33.9112	23.3472	22.6853	10.497	10.6008	NME7	18.428	2.00811	1.38255	1.34335	0.621599	0.627745	1.09125
chr17	4940287	4940437	RNF167	45	+	13.5097	24.8682	18.6778	20.2973	10.497	21.2017	RNF167	35.0132	1.84077	1.38255	1.50242	0.776997	1.56937	2.59171
chr11	68751381	68751531	TESMIN	43	-	6.75484	9.79657	9.33889	25.0732	52.4852	25.442	TESMIN	38.6988	1.4503	1.38255	3.71189	7.77001	3.76648	5.72905
chr7	94907625	94907775	PPP1R9A	28	+	3.37742	2.26075	4.66944	7.16377	13.1213	14.8412	PPP1R9A	23.9564	0.669372	1.38255	2.12108	3.88501	4.39424	7.09311
chr17	42981171	42981321	PTGES3L	22	-	3.37742	6.78224	4.66944	9.55169	10.497	8.48068	PTGES3L	7.3712	2.00811	1.38255	2.8281	3.10799	2.51099	2.18249
chr17	42981171	42981321	PTGES3L-AARSD1	22	-	3.37742	6.78224	4.66944	9.55169	10.497	8.48068	PTGES3L-AARSD1	7.3712	2.00811	1.38255	2.8281	3.10799	2.51099	2.18249
chr14	34875263	34875413	BAZ1A	356	-	243.737	440.092	336.867	279.387	154.831	116.609	BAZ1A	226.664	1.8056	1.38209	1.14626	0.635238	0.478421	0.929953
chr19	1438332	1438482	RPS15	367	+	257.81	387.341	356.212	382.067	220.438	156.893	RPS15	375.931	1.50243	1.38168	1.48197	0.855041	0.608561	1.45817
chr2	86106165	86106315	PTCD3	282	+	118.773	201.206	164.098	187.452	107.595	93.2874	PTCD3	197.18	1.69404	1.38161	1.57824	0.905888	0.785426	1.66014
chrY	20575706	20575856	EIF1AY	164	+	57.979	98.7193	80.0476	87.1591	60.3579	50.8841	EIF1AY	134.524	1.70267	1.38063	1.50329	1.04103	0.87763	2.32022
chr6	47309837	47309987	TNFRSF21	129	-	51.2242	80.6333	70.7087	78.8014	81.352	80.5664	TNFRSF21	121.625	1.57413	1.38038	1.53836	1.58816	1.57282	2.37437
chr17	44899326	44899476	EFTUD2	149	-	85.5612	122.08	118.07	152.827	112.843	82.6866	EFTUD2	152.952	1.42681	1.37995	1.78617	1.31886	0.966403	1.78763
chr11	14520276	14520426	PSMA1	221	-	96.2564	134.138	132.746	131.336	112.843	86.9269	PSMA1	165.852	1.39355	1.37909	1.36444	1.17232	0.903077	1.72302
chr14	56118341	56118491	PELI2	200	+	144.666	192.163	199.452	105.069	65.6064	67.8454	PELI2	125.31	1.32832	1.37871	0.726287	0.453503	0.46898	0.866202
chr10	12068904	12069054	DHTKD1	121	+	103.574	134.891	142.752	206.555	128.589	82.6866	DHTKD1	125.31	1.30236	1.37826	1.99427	1.24152	0.798334	1.20986
chr2	69915017	69915167	MXD1	162	+	166.056	266.768	228.803	126.56	73.4792	63.6051	MXD1	151.11	1.60649	1.37787	0.762153	0.442497	0.383034	0.909994
chr17	47649907	47650057	KPNB1	62	+	41.6548	45.2149	57.3675	65.6678	94.4733	55.1244	KPNB1	95.8256	1.08547	1.37721	1.57648	2.26801	1.32336	2.30047
chr18	26548482	26548632	KCTD1	109	-	38.2774	61.7937	52.698	70.4437	55.1094	36.0429	KCTD1	114.254	1.61437	1.37674	1.84035	1.43974	0.941624	2.98489
chr18	21704697	21704847	ABHD3	213	-	122.15	179.353	168.1	150.439	83.9762	125.09	ABHD3	165.852	1.4683	1.37618	1.23159	0.687484	1.02407	1.35777
chr1	229626166	229626316	URB2	181	+	97.9451	97.2121	134.747	267.447	194.195	112.369	URB2	202.708	0.992516	1.37574	2.73058	1.98269	1.14727	2.06961
chr11	12110537	12110687	MICAL2	128	+	48.9726	67.0688	67.3734	113.426	115.467	82.6866	MICAL2	108.725	1.36952	1.37574	2.31611	2.35779	1.68843	2.22012
chr12	31326078	31326228	SINHCAF	142	-	45.5951	75.3582	62.704	87.1591	68.2307	25.442	SINHCAF	101.354	1.65277	1.37524	1.91159	1.49645	0.557999	2.22291
chr9	129803106	129803256	TOR1B	219	+	105.263	137.152	144.753	100.293	94.4733	76.3261	TOR1B	182.437	1.30295	1.37516	0.952785	0.897498	0.725099	1.73315
chr21	43864500	43864650	AGPAT3	58	+	28.1451	48.2293	38.6897	59.698	41.9881	23.3219	AGPAT3	25.7992	1.71359	1.37465	2.12108	1.49184	0.828631	0.91665
chr3	20039977	20040127	KAT2B	20	+	14.0726	23.3611	19.3448	26.2671	10.497	14.8412	KAT2B	31.3276	1.66004	1.37464	1.86654	0.745918	1.05462	2.22614
chr1	184974380	184974530	FAM129A	369	-	88.3758	137.906	121.406	77.6075	86.6005	112.369	FAM129A	191.651	1.56045	1.37375	0.878153	0.979912	1.27149	2.16859
chr1	113759411	113759561	PHTF1	178	-	280.326	406.934	384.896	308.042	165.328	118.729	PHTF1	276.42	1.45165	1.37303	1.09887	0.58977	0.423539	0.986066
chr17	14301013	14301163	HS3ST3B1	394	+	309.034	620.952	424.252	321.175	209.941	165.373	HS3ST3B1	318.804	2.00933	1.37283	1.03929	0.679346	0.535129	1.03161
chr1	1724256	1724406	CDK11A	152	-	88.9387	114.545	122.073	118.202	89.2248	72.0858	CDK11A	138.21	1.28791	1.37255	1.32903	1.00322	0.810511	1.55399
chr12	12891492	12891642	GPRC5A	220	+	74.8661	111.53	102.728	225.659	102.346	116.609	GPRC5A	127.153	1.48973	1.37216	3.01417	1.36705	1.55757	1.69841
chr2	26244550	26244700	HADHA	122	-	74.8661	114.545	102.728	142.081	94.4733	50.8841	HADHA	141.896	1.53	1.37216	1.8978	1.2619	0.679668	1.89533
chr18	57621718	57621868	NARS	280	-	128.905	195.178	176.772	193.422	178.45	142.051	NARS	259.835	1.51412	1.37134	1.5005	1.38435	1.10198	2.01571
chr6	34888072	34888222	ANKS1A	91	+	39.4032	70.8367	54.0321	50.1464	55.1094	29.6824	ANKS1A	70.0264	1.79774	1.37126	1.27265	1.3986	0.753299	1.77718
chr1	226062647	226062797	H3F3A	676	+	345.06	584.78	472.948	312.818	196.819	163.253	H3F3A	423.844	1.69472	1.37063	0.906561	0.570391	0.473115	1.22832
chr19	37779818	37779968	ZNF573	120	-	155.361	307.462	212.793	161.185	49.8609	33.9227	ZNF573	64.498	1.97902	1.36967	1.03749	0.320936	0.218348	0.415149
chr5	60700058	60700208	DEPDC1B	42	-	32.6484	49.7364	44.6932	51.3403	23.6183	8.48068	DEPDC1B	68.1836	1.52339	1.36892	1.57252	0.723414	0.259758	2.08842
chr15	82809571	82809721	WHAMM	441	+	297.776	560.665	407.576	364.158	220.438	197.176	WHAMM	359.346	1.88284	1.36873	1.22293	0.740281	0.662162	1.20677
chr20	49277985	49278135	ZNFX1	207	-	222.91	520.725	304.848	282.969	181.074	195.056	ZNFX1	248.778	2.33603	1.36758	1.26943	0.812319	0.875044	1.11605
chr12	31659399	31659549	ETFBKMT	116	+	58.5419	102.487	80.0476	75.2195	55.1094	27.5622	ETFBKMT	73.712	1.75066	1.36736	1.28488	0.941367	0.470812	1.25913
chr3	28348921	28349071	AZI2	95	-	36.5887	57.2723	50.0298	57.3101	52.4852	36.0429	AZI2	79.2404	1.5653	1.36736	1.56633	1.43446	0.985083	2.16571
chr11	64917133	64917283	ATG2A	804	-	267.942	480.032	366.218	287.745	241.432	180.214	ATG2A	357.503	1.79155	1.36678	1.07391	0.901061	0.672586	1.33426
chr12	123232844	123232994	C12orf65	390	+	540.387	776.19	738.439	644.739	404.136	347.708	C12orf65	571.268	1.43636	1.3665	1.19311	0.747864	0.643443	1.05715
chr3	196082017	196082167	TFRC	178	-	162.116	234.364	221.465	204.167	78.7277	55.1244	TFRC	128.996	1.44566	1.36609	1.25939	0.485626	0.340031	0.795702
chr3	138187256	138187406	ARMC8	74	+	40.529	41.447	55.3663	83.5773	31.4911	36.0429	ARMC8	58.9696	1.02265	1.36609	2.06216	0.777002	0.889311	1.455
chr1	33036775	33036925	AK2	135	-	66.4225	110.777	90.7206	91.935	60.3579	65.7252	AK2	105.04	1.66776	1.36581	1.38409	0.908697	0.989502	1.58139
chr11	10857979	10858129	ZBED5	602	-	274.134	387.341	374.223	336.697	265.05	184.455	ZBED5	457.014	1.41296	1.36511	1.22822	0.966863	0.672864	1.66712
chr14	39267318	39267468	MIA2	322	+	193.076	289.376	263.49	237.598	207.316	163.253	MIA2	355.66	1.49877	1.3647	1.23059	1.07375	0.845538	1.84207
chr19	49451739	49451889	PIH1D1	93	-	55.7274	70.0832	76.0452	77.6075	47.2366	29.6824	PIH1D1	105.04	1.25761	1.36459	1.39263	0.847637	0.532636	1.88489
chrX	44873132	44873282	KDM6A	126	+	70.9258	88.9227	96.7242	68.0558	52.4852	50.8841	KDM6A	110.568	1.25374	1.36374	0.959535	0.740002	0.717427	1.55892
chr20	17682169	17682319	RRBP1	678	-	415.422	655.617	566.337	361.77	228.31	212.017	RRBP1	434.901	1.5782	1.36328	0.870849	0.549586	0.510365	1.04689
chr13	114314457	114314607	CHAMP1	556	+	435.124	558.404	593.019	522.955	272.923	220.498	CHAMP1	619.181	1.28332	1.36287	1.20185	0.62723	0.506748	1.423
chr17	79074819	79074969	ENGASE	321	+	168.871	250.943	230.137	242.374	141.71	188.695	ENGASE	289.32	1.486	1.3628	1.43526	0.839161	1.11739	1.71326
chr19	53467686	53467836	ZNF813	161	+	112.581	132.63	153.425	165.961	86.6005	65.7252	ZNF813	127.153	1.17809	1.3628	1.47415	0.769228	0.583804	1.12944
chr15	90352258	90352408	ZNF774	44	+	22.5161	30.1433	30.6849	65.6678	47.2366	29.6824	ZNF774	70.0264	1.33874	1.3628	2.91648	2.0979	1.31827	3.11006
chr12	54560552	54560702	PDE1B	21	+	11.2581	10.5502	15.3425	25.0732	28.8668	6.36051	PDE1B	36.856	0.937121	1.3628	2.22713	2.56409	0.564972	3.27373
chr14	67533042	67533192	PLEKHH1	36	+	11.2581	18.086	15.3425	37.0128	18.3698	48.7639	PLEKHH1	27.642	1.60649	1.3628	3.28766	1.6317	4.33145	2.4553
chr15	52528798	52528948	MYO5A	149	-	217.843	250.943	296.843	334.309	199.444	148.412	MYO5A	293.005	1.15194	1.36265	1.53463	0.91554	0.68128	1.34503
chr3	57597279	57597429	ARF4	672	-	372.079	526.754	506.968	421.468	304.414	241.699	ARF4	515.984	1.4157	1.36253	1.13274	0.818143	0.649591	1.38676
chr12	130872006	130872156	RAN	399	+	233.042	297.665	317.522	334.309	238.807	165.373	RAN	423.844	1.2773	1.36251	1.43454	1.02474	0.709627	1.81875
chr19	11814214	11814364	ZNF440	432	+	305.656	499.625	416.248	267.447	154.831	133.571	ZNF440	324.333	1.6346	1.36182	0.874993	0.506553	0.436998	1.0611
chr11	9003908	9004058	NRIP3	30	-	26.4564	29.3897	36.0214	46.5645	49.8609	48.7639	NRIP3	31.3276	1.11087	1.36154	1.76005	1.88464	1.84318	1.18412
chr9	83956650	83956800	C9orf64	103	-	41.6548	57.2723	56.7004	78.8014	76.1035	27.5622	C9orf64	86.6116	1.37493	1.3612	1.89177	1.827	0.661681	2.07927
chr4	185395834	185395984	LRP2BP	120	-	56.8532	76.1118	77.3794	84.7712	73.4792	74.2059	LRP2BP	95.8256	1.33874	1.36104	1.49105	1.29244	1.30522	1.68549
chr10	13586914	13587064	PRPF18	261	+	102.448	147.702	139.416	108.65	78.7277	69.9656	PRPF18	158.481	1.44173	1.36085	1.06054	0.768465	0.682938	1.54694
chr3	128650745	128650895	RPN1	217	-	163.242	195.931	222.132	271.029	170.577	148.412	RPN1	285.634	1.20025	1.36075	1.66029	1.04493	0.909153	1.74976
chr22	41998731	41998881	WBP2NL	97	+	30.3968	55.7651	41.3579	46.5645	34.1153	44.5236	WBP2NL	55.284	1.83457	1.3606	1.53189	1.12233	1.46475	1.81874
chr15	30626037	30626187	ARHGAP11B	23	+	15.1984	23.3611	20.679	27.4611	20.9941	10.6008	ARHGAP11B	29.4848	1.53708	1.3606	1.80684	1.38134	0.697494	1.93999
chr4	120066702	120066852	MAD2L1	26	-	15.1984	13.5645	20.679	39.4007	13.1213	4.24034	MAD2L1	49.7556	0.892495	1.3606	2.59242	0.863334	0.278999	3.27374
chrX	18425538	18425688	CDKL5	157	+	64.7338	88.9227	88.0524	65.6678	49.8609	48.7639	CDKL5	92.14	1.37367	1.36022	1.01443	0.770245	0.753299	1.42337
chr15	55319053	55319203	PIGBOS1	89	-	64.7338	93.4442	88.0524	93.1289	89.2248	33.9227	PIGBOS1	73.712	1.44351	1.36022	1.43864	1.37833	0.524034	1.13869
chr5	36151796	36151946	LMBRD2	122	-	68.6742	93.4442	93.3889	87.1591	65.6064	46.6437	LMBRD2	77.3976	1.36069	1.35988	1.26917	0.955328	0.679203	1.12703
chr6	33289540	33289690	PFDN6	112	+	34.3371	61.7937	46.6944	63.2799	39.3639	50.8841	PFDN6	64.498	1.79962	1.35988	1.8429	1.1464	1.4819	1.87838
chr9	37120509	37120659	ZCCHC7	142	+	133.971	166.542	182.108	140.887	86.6005	80.5664	ZCCHC7	140.053	1.24312	1.35931	1.05162	0.646412	0.601372	1.0454
chr7	35695050	35695200	HERPUD2	291	-	145.792	197.439	198.118	130.142	128.589	99.648	HERPUD2	200.865	1.35425	1.35891	0.892655	0.882003	0.683494	1.37775
chr4	145619376	145619526	MMAA	224	+	169.434	260.739	230.137	210.137	154.831	108.129	MMAA	191.651	1.53888	1.35827	1.24023	0.913813	0.638178	1.13112
chr6	150069039	150069189	ULBP3	60	-	57.979	81.3869	78.7135	74.0256	39.3639	4.24034	ULBP3	40.5416	1.40373	1.35762	1.27677	0.678934	0.0731358	0.699246
chr6	106325591	106325741	ATG5	176	-	88.9387	128.863	120.738	171.93	115.467	97.5278	ATG5	165.852	1.4489	1.35754	1.93313	1.29828	1.09657	1.86479
chr16	56625706	56625856	MT1E	334	+	104.7	221.553	142.085	152.827	112.843	103.888	MT1E	206.394	2.11607	1.35707	1.45967	1.07777	0.992245	1.97129
chr17	77140927	77141077	SEC14L1	114	+	89.5016	82.1405	121.406	156.409	78.7277	65.7252	SEC14L1	128.996	0.917755	1.35647	1.74756	0.879623	0.734347	1.44127
chr14	24299799	24299949	NOP9	175	+	93.4419	146.949	126.742	143.275	102.346	72.0858	NOP9	156.638	1.57262	1.35637	1.53331	1.09529	0.77145	1.67631
chr12	32534246	32534396	FGD4	52	+	50.6613	76.1118	68.7075	47.7584	34.1153	10.6008	FGD4	62.6552	1.50237	1.35621	0.9427	0.6734	0.209248	1.23675
chr1	149832582	149832732	HIST2H4A	3340	+	995.212	1684.26	1349.47	1161.72	1099.56	886.231	HIST2H4A	1879.66	1.69236	1.35596	1.16731	1.10485	0.890495	1.8887
chr2	108719433	108719583	RANBP2	250	+	152.547	214.017	206.79	232.822	131.213	131.45	RANBP2	241.407	1.40296	1.35558	1.52623	0.860148	0.861702	1.58251
chr11	62831579	62831729	STX5	211	-	160.427	221.553	217.463	127.754	60.3579	80.5664	STX5	175.066	1.38102	1.35553	0.796337	0.376233	0.5022	1.09125
chr1	205813090	205813240	SLC41A1	516	-	256.121	398.645	346.873	291.326	207.316	112.369	SLC41A1	226.664	1.55647	1.35433	1.13745	0.809446	0.438734	0.884988
chr9	128098445	128098595	SLC25A25	457	+	216.718	451.396	293.508	259.09	123.34	106.008	SLC25A25	193.494	2.08287	1.35433	1.19552	0.569127	0.489152	0.892838
chr3	119677306	119677456	COX17	121	-	86.6871	126.602	117.403	81.1893	62.9822	36.0429	COX17	105.04	1.46045	1.35433	0.936579	0.726546	0.415782	1.21171
chr17	76265196	76265346	UBALD2	188	+	66.9855	114.545	90.7206	58.5041	41.9881	53.0042	UBALD2	93.9828	1.71	1.35433	0.873385	0.626824	0.791279	1.40303
chr20	10034964	10035114	ANKEF1	33	+	7.88064	7.53582	10.673	54.9222	23.6183	21.2017	ANKEF1	47.9128	0.956245	1.35433	6.96926	2.997	2.69035	6.07981
chr1	166166910	166167060	FAM78B	26	-	7.88064	9.04299	10.673	19.1034	7.87277	2.12017	FAM78B	18.428	1.14749	1.35433	2.42409	0.999001	0.269035	2.33839
chr22	23966815	23966965	DDTL	601	+	205.46	316.505	278.165	249.538	170.577	127.21	DDTL	316.962	1.54047	1.35386	1.21453	0.83022	0.619147	1.54269
chr17	28357591	28357741	TMEM199	167	+	110.892	147.702	150.089	142.081	99.7218	59.3647	TMEM199	151.11	1.33194	1.35347	1.28126	0.89927	0.535338	1.36268
chr5	176361695	176361845	KIAA1191	395	-	277.511	361.72	375.557	355.8	181.074	163.253	KIAA1191	375.931	1.30344	1.3533	1.28211	0.652493	0.588276	1.35465
chr19	9674990	9675140	ZNF562	261	-	91.1903	113.037	123.407	156.409	102.346	108.129	ZNF562	184.28	1.23957	1.35329	1.71519	1.12233	1.18575	2.02083
chr2	37196450	37196600	CEBPZOS	162	+	75.429	119.066	102.061	131.336	62.9822	69.9656	CEBPZOS	165.852	1.57852	1.35307	1.74119	0.834987	0.927569	2.19878
chr3	142149403	142149553	TFDP2	114	-	59.6677	89.6763	80.7147	82.3833	76.1035	57.2446	TFDP2	97.6684	1.50293	1.35274	1.3807	1.27546	0.95939	1.63687
chr2	105398947	105399097	FHL2	140	-	107.514	145.441	145.42	202.973	120.716	50.8841	FHL2	132.682	1.35276	1.35257	1.88788	1.12279	0.473279	1.23409
chr5	7868930	7869080	FASTKD3	124	-	75.9919	83.6476	102.728	112.232	86.6005	84.8068	FASTKD3	101.354	1.10074	1.35183	1.47689	1.1396	1.116	1.33375
chr17	41966718	41966868	CNP	274	+	405.29	842.505	547.659	512.209	307.038	226.858	CNP	528.884	2.07877	1.35128	1.26381	0.757576	0.559742	1.30495
chr3	128487851	128488001	GATA2	98	-	56.2903	85.9084	76.0452	59.698	26.2426	42.4034	GATA2	55.284	1.52617	1.35095	1.06054	0.466201	0.753299	0.982123
chr17	78186973	78187123	TK1	49	-	28.1451	40.6934	38.0226	69.2497	44.6124	29.6824	TK1	103.197	1.44584	1.35095	2.46045	1.58509	1.05462	3.66661
chr19	19865815	19865965	ZNF253	336	+	136.785	219.292	184.777	228.047	136.461	91.1673	ZNF253	261.678	1.60319	1.35086	1.66719	0.997631	0.666501	1.91306
chr3	39153512	39153662	CSRNP1	621	-	346.185	555.39	467.611	484.748	391.014	265.021	CSRNP1	427.53	1.60432	1.35075	1.40026	1.12949	0.765547	1.23498
chr9	94259271	94259421	ZNF169	82	+	52.35	68.576	70.7087	97.9048	44.6124	38.163	ZNF169	116.096	1.30995	1.35069	1.8702	0.852195	0.728997	2.21769
chr16	370468	370618	MRPL28	36	-	24.2048	28.6361	32.6861	38.2067	44.6124	21.2017	MRPL28	44.2272	1.18308	1.3504	1.57848	1.84312	0.87593	1.82721
chr1	236523928	236524078	LGALS8	143	+	92.879	171.817	125.408	109.844	76.1035	61.4849	LGALS8	110.568	1.8499	1.35023	1.18266	0.819383	0.661989	1.19045
chr7	92590272	92590422	FAM133B	423	-	113.143	201.206	152.758	146.857	125.964	82.6866	FAM133B	132.682	1.77833	1.35013	1.29798	1.11332	0.730815	1.17269
chr1	212414781	212414931	TMEM206	136	-	105.263	139.413	142.085	211.331	94.4733	86.9269	TMEM206	211.922	1.32443	1.34981	2.00765	0.897498	0.825807	2.01326
chr12	122225950	122226100	DIABLO	215	-	145.792	207.989	196.784	205.361	133.837	99.648	DIABLO	210.079	1.42661	1.34976	1.40859	0.918	0.683494	1.44095
chr22	37608924	37609074	GGA1	42	+	20.2645	36.9255	27.3496	53.7282	57.7337	36.0429	GGA1	40.5416	1.82218	1.34963	2.65135	2.84901	1.77862	2.00062
chr1	43969935	43970085	DPH2	108	+	56.8532	74.6046	76.7123	83.5773	68.2307	53.0042	DPH2	103.197	1.31223	1.3493	1.47005	1.20012	0.932299	1.81515
chr6	71288737	71288887	OGFRL1	485	+	361.947	566.694	488.29	414.304	283.42	212.017	OGFRL1	386.988	1.56568	1.34906	1.14465	0.783043	0.585768	1.06918
chr2	70293352	70293502	SNRPG	133	-	69.2371	92.6906	93.3889	122.978	62.9822	59.3647	SNRPG	101.354	1.33874	1.34883	1.77619	0.90966	0.857412	1.46387
chr12	76559694	76559844	OSBPL8	572	-	440.753	707.614	594.354	376.098	259.802	175.974	OSBPL8	434.901	1.60547	1.3485	0.853308	0.58945	0.399258	0.986723
chrX	119468375	119468525	SLC25A5	206	+	159.302	223.06	214.794	321.175	262.426	165.373	SLC25A5	257.992	1.40023	1.34834	2.01614	1.64735	1.03811	1.61952
chr6	26457885	26458035	BTN2A1	203	+	122.713	250.189	165.432	146.857	110.219	76.3261	BTN2A1	165.852	2.03881	1.34812	1.19675	0.898185	0.621989	1.35154
chr17	81295201	81295351	SLC38A10	211	-	188.572	208.742	254.151	229.24	152.207	137.811	SLC38A10	224.822	1.10696	1.34777	1.21566	0.807156	0.730814	1.19223
chr4	173334283	173334433	HMGB2	1189	-	422.74	691.035	569.672	388.037	338.529	239.579	HMGB2	628.395	1.63466	1.34757	0.917909	0.800797	0.566729	1.48648
chr4	99950201	99950351	H2AFZ	394	-	197.016	272.043	265.491	293.714	230.935	212.017	H2AFZ	434.901	1.38082	1.34756	1.49081	1.17216	1.07614	2.20744
chr8	135457383	135457533	KHDRBS3	499	+	472.276	721.932	636.379	512.209	293.917	205.656	KHDRBS3	515.984	1.52862	1.34747	1.08455	0.622342	0.435457	1.09255
chr15	59105076	59105226	CCNB2	95	+	65.8596	107.009	88.7194	113.426	81.352	40.2832	CCNB2	128.996	1.6248	1.3471	1.72224	1.23523	0.611653	1.95865
chr1	78004858	78005008	DNAJB4	175	+	189.698	333.837	255.485	136.112	57.7337	55.1244	DNAJB4	119.782	1.75983	1.3468	0.717519	0.304345	0.29059	0.631435
chrX	130903136	130903286	ENOX2	85	-	74.3032	92.6906	100.06	94.3229	55.1094	48.7639	ENOX2	73.712	1.24746	1.34664	1.26943	0.741683	0.656283	0.992043
chr1	36464283	36464433	MRPS15	169	-	57.979	77.619	78.0464	130.142	62.9822	84.8068	MRPS15	132.682	1.33874	1.34611	2.24464	1.08629	1.46272	2.28845
chr13	49792955	49793105	KPNA3	178	-	91.1903	129.616	122.74	162.379	104.97	67.8454	KPNA3	158.481	1.42138	1.34598	1.78066	1.15111	0.743998	1.73792
chr6	26183693	26183843	HIST1H2BE	423	+	166.056	270.536	223.466	228.047	228.31	216.257	HIST1H2BE	234.036	1.62919	1.34573	1.37331	1.3749	1.30231	1.40938
chr12	112108704	112108854	NAA25	135	-	66.4225	82.8941	89.3865	128.948	89.2248	63.6051	NAA25	138.21	1.24798	1.34573	1.94133	1.34329	0.957584	2.08077
chr22	41946643	41946793	CENPM	102	-	20.8274	20.3467	28.0167	47.7584	39.3639	50.8841	CENPM	97.6684	0.97692	1.34518	2.29306	1.89001	2.44313	4.68942
chr1	103525923	103526073	RNPC3	140	+	79.3693	103.241	106.73	100.293	70.855	61.4849	RNPC3	110.568	1.30077	1.34473	1.26362	0.892726	0.774669	1.39308
chr18	31943034	31943184	TRAPPC8	270	-	125.527	177.845	168.767	176.706	141.71	86.9269	TRAPPC8	217.45	1.41679	1.34447	1.40771	1.12892	0.692496	1.7323
chr5	96702762	96702912	CAST	208	+	104.7	185.381	140.75	167.155	120.716	114.489	CAST	147.424	1.77059	1.34432	1.59651	1.15297	1.0935	1.40806
chr18	32091866	32092016	RNF138	118	+	37.7145	49.7364	50.6968	107.456	81.352	61.4849	RNF138	116.096	1.31876	1.34423	2.8492	2.15705	1.63027	3.07829
chr8	123042224	123042374	DERL1	184	-	126.09	194.424	169.434	171.93	157.455	84.8068	DERL1	171.38	1.54195	1.34375	1.36355	1.24875	0.672589	1.35919
chr5	57174005	57174155	GPBP1	91	+	63.0451	70.0832	84.7171	68.0558	73.4792	61.4849	GPBP1	81.0832	1.11164	1.34375	1.07948	1.1655	0.975253	1.28611
chrX	24149662	24149812	ZFX	156	+	79.9322	108.516	107.397	120.59	41.9881	46.6437	ZFX	123.468	1.3576	1.3436	1.50865	0.525296	0.583541	1.54466
chr1	38005419	38005569	FHL3	192	-	252.743	357.952	339.535	362.964	207.316	135.691	FHL3	274.577	1.41627	1.3434	1.4361	0.820264	0.536873	1.08639
chr15	55290177	55290327	RAB27A	124	-	50.6613	98.7193	68.0405	76.4135	47.2366	59.3647	RAB27A	97.6684	1.94861	1.34305	1.50832	0.9324	1.1718	1.92787
chr9	6757329	6757479	KDM4C	100	+	16.8871	23.3611	22.6802	38.2067	28.8668	42.4034	KDM4C	29.4848	1.38337	1.34305	2.26248	1.7094	2.51099	1.746
chr14	35121819	35121969	KIAA0391	58	+	16.8871	20.3467	22.6802	50.1464	28.8668	27.5622	KIAA0391	42.3844	1.20487	1.34305	2.96951	1.7094	1.63215	2.50987
chrX	24693848	24693998	POLA1	48	+	16.8871	15.8252	22.6802	27.4611	18.3698	16.9614	POLA1	42.3844	0.937118	1.34305	1.62616	1.0878	1.0044	2.50987
chr5	86617881	86618031	COX7C	266	+	101.885	167.295	136.748	183.87	107.595	93.2874	COX7C	211.922	1.642	1.34218	1.80468	1.05604	0.915615	2.08001
chr8	102864076	102864226	AZIN1	334	-	204.897	268.275	274.83	201.779	204.692	125.09	AZIN1	304.062	1.30932	1.34131	0.984783	0.998999	0.610502	1.48397
chr2	172556002	172556152	PDK1	69	+	94.0048	102.487	126.075	121.784	41.9881	31.8025	PDK1	62.6552	1.09023	1.34115	1.29551	0.446659	0.338307	0.666511
chr17	35242992	35243142	SLFN5	371	+	380.522	653.356	510.304	427.438	275.547	281.983	SLFN5	514.141	1.717	1.34106	1.12329	0.724129	0.741043	1.35115
chr11	2929342	2929492	PHLDA2	644	-	286.518	380.559	384.229	445.347	301.79	303.184	PHLDA2	545.469	1.32822	1.34103	1.55434	1.0533	1.05817	1.90379
chr5	138575322	138575472	HSPA9	416	-	98.508	133.384	132.079	205.361	259.802	214.137	HSPA9	326.176	1.35404	1.34079	2.08471	2.63737	2.1738	3.31116
chr20	3209427	3209577	ITPA	108	+	60.2306	84.4012	80.7147	76.4135	62.9822	44.5236	ITPA	70.0264	1.4013	1.34009	1.26868	1.04568	0.739219	1.16264
chr20	45972107	45972257	ZNF335	118	-	64.7338	100.98	86.7182	68.0558	57.7337	50.8841	ZNF335	73.712	1.55993	1.33961	1.05132	0.891863	0.786051	1.13869
chr11	1572154	1572304	DUSP8	66	-	43.3435	58.0258	58.0345	114.62	78.7277	78.4463	DUSP8	103.197	1.33874	1.33894	2.64446	1.81637	1.80987	2.38091
chr6	27132707	27132857	HIST1H2BJ	322	-	252.181	275.811	337.534	520.567	474.991	385.871	HIST1H2BJ	379.617	1.0937	1.33846	2.06426	1.88353	1.53014	1.50534
chr6	28587194	28587344	ZBED9	108	-	17.45	24.8682	23.3472	39.4007	49.8609	63.6051	ZBED9	49.7556	1.42511	1.33795	2.25792	2.85736	3.64499	2.85132
chr11	122655686	122655836	UBASH3B	88	+	78.8064	127.355	105.396	96.7108	34.1153	57.2446	UBASH3B	84.7688	1.61605	1.3374	1.22719	0.4329	0.726395	1.07566
chr16	67431046	67431196	HSD11B2	50	+	39.4032	53.5043	52.698	27.4611	10.497	19.0815	HSD11B2	25.7992	1.35787	1.3374	0.696926	0.2664	0.484263	0.654749
chr7	64562991	64563141	ZNF680	79	-	48.4097	63.3009	64.7052	63.2799	36.7396	27.5622	ZNF680	70.0264	1.30761	1.33662	1.30717	0.758931	0.569353	1.44654
chr14	67816501	67816651	ZFYVE26	126	-	79.3693	163.527	106.063	83.5773	102.346	69.9656	ZFYVE26	143.738	2.06033	1.33632	1.05302	1.28949	0.88152	1.811
chr13	78659071	78659221	RNF219	106	-	57.4161	68.576	76.7123	105.069	78.7277	46.6437	RNF219	93.9828	1.19437	1.33608	1.82996	1.37118	0.81238	1.63687
chr14	24161218	24161368	IRF9	192	+	207.711	443.86	277.498	193.422	157.455	106.008	IRF9	219.293	2.13691	1.33598	0.931207	0.758048	0.510363	1.05576
chr21	17612793	17612943	BTG3	322	-	213.903	297.665	285.503	365.352	202.068	173.854	BTG3	342.761	1.39159	1.33473	1.70803	0.944671	0.81277	1.60241
chr6	30617167	30617317	PPP1R10	1597	-	691.808	1227.59	923.216	653.097	595.706	498.24	PPP1R10	823.732	1.77447	1.3345	0.944044	0.861086	0.7202	1.19069
chr14	63727970	63728120	SGPP1	245	-	151.984	179.353	202.787	157.603	99.7218	118.729	SGPP1	121.625	1.18008	1.33427	1.03697	0.656134	0.781194	0.800249
chr12	48925447	48925597	FKBP11	22	-	160.99	208.742	214.794	114.62	57.7337	29.6824	FKBP11	49.7556	1.29661	1.33421	0.71197	0.358617	0.184374	0.30906
chr15	74129582	74129732	ISLR2	35	+	0	0	1.33413	0	5.24852	8.48068	ISLR2	9.214	0	1.33413	0	5.24852	8.48068	9.214
chr2	47570837	47570987	KCNK12	19	-	0	1.50716	1.33413	9.55169	7.87277	10.6008	KCNK12	1.8428	1.50716	1.33413	9.55169	7.87277	10.6008	1.8428
chr15	90265613	90265763	NGRN	236	+	125.527	149.209	167.433	219.689	125.964	108.129	NGRN	210.079	1.18866	1.33384	1.75013	1.00348	0.8614	1.67358
chr17	10697457	10697607	SCO1	398	-	216.155	307.462	288.171	306.848	215.189	137.811	SCO1	289.32	1.42241	1.33317	1.41957	0.995531	0.637556	1.33848
chrY	7274020	7274170	PRKY	46	+	63.0451	93.4442	84.05	88.3531	44.6124	33.9227	PRKY	88.4544	1.48218	1.33317	1.40143	0.707627	0.53807	1.40303
chr5	111224323	111224473	CAMK4	20	+	22.5161	33.1576	30.0179	26.2671	26.2426	14.8412	CAMK4	29.4848	1.47262	1.33317	1.16659	1.1655	0.659137	1.3095
chr3	108589821	108589971	CIP2A	36	-	18.0129	25.6218	24.0143	32.2369	7.87277	16.9614	CIP2A	18.428	1.42241	1.33317	1.78966	0.437063	0.941625	1.02304
chr22	24953005	24953155	KIAA1671	49	+	18.0129	20.3467	24.0143	33.4309	39.3639	23.3219	KIAA1671	35.0132	1.12956	1.33317	1.85594	2.18532	1.29473	1.94378
chr15	94231092	94231242	MCTP2	35	+	13.5097	36.172	18.0107	22.6853	10.497	10.6008	MCTP2	25.7992	2.67748	1.33317	1.67919	0.776997	0.784681	1.90968
chr1	24321896	24322046	GRHL3	29	+	4.50322	6.02866	6.00357	21.4913	10.497	14.8412	GRHL3	16.5852	1.33874	1.33317	4.77243	2.331	3.29569	3.68296
chr2	165953686	165953836	TTC21B	448	-	297.776	473.25	396.903	324.757	160.08	146.292	TTC21B	318.804	1.58928	1.33289	1.09061	0.537585	0.491282	1.07062
chr10	18659367	18659517	ARL5B	149	+	135.66	214.771	180.774	168.348	83.9762	65.7252	ARL5B	164.009	1.58316	1.33255	1.24096	0.61902	0.484485	1.20897
chr1	22451803	22451953	ZBTB40	115	+	86.1242	96.4585	114.735	128.948	125.964	53.0042	ZBTB40	125.31	1.11999	1.3322	1.49723	1.46259	0.615439	1.45499
chr15	45198605	45198755	SHF	66	-	376.582	614.17	501.632	502.658	391.014	390.111	SHF	326.176	1.63091	1.33207	1.33479	1.03832	1.03593	0.866149
chr1	51990613	51990763	RAB3B	85	-	72.6145	94.1978	96.7242	138.499	57.7337	63.6051	RAB3B	92.14	1.29723	1.33202	1.90732	0.795071	0.875928	1.26889
chr1	228406732	228406882	TRIM11	162	-	136.223	167.295	181.441	231.628	136.461	112.369	TRIM11	239.564	1.2281	1.33194	1.70036	1.00175	0.82489	1.75862
chrX	65667625	65667775	MSN	104	+	63.608	70.8367	84.7171	97.9048	89.2248	74.2059	MSN	110.568	1.11364	1.33186	1.53919	1.40273	1.16661	1.73827
chr10	7787910	7788060	KIN	167	-	91.1903	143.181	121.406	107.456	89.2248	44.5236	KIN	119.782	1.57013	1.33135	1.17837	0.978446	0.488249	1.31354
chr19	4457717	4457867	UBXN6	142	-	41.0919	77.619	54.6992	34.6249	36.7396	40.2832	UBXN6	42.3844	1.88891	1.33114	0.842621	0.894084	0.98032	1.03145
chr19	39435866	39436016	RPS16	414	-	233.042	405.427	310.184	271.029	149.583	144.172	RPS16	257.992	1.73972	1.33102	1.163	0.641871	0.618652	1.10706
chr4	145180435	145180585	OTUD4	91	-	73.1774	113.791	97.3913	106.263	78.7277	48.7639	OTUD4	95.8256	1.555	1.33089	1.45213	1.07585	0.666379	1.3095
chr1	205121910	205122060	RBBP5	350	-	206.022	296.158	274.163	245.956	199.444	125.09	RBBP5	241.407	1.43751	1.33075	1.19383	0.968071	0.607168	1.17175
chr2	200864585	200864735	CLK1	803	-	398.535	584.026	530.315	440.572	296.541	222.618	CLK1	538.098	1.46543	1.33066	1.10548	0.744078	0.558591	1.35019
chr6	33391786	33391936	KIFC1	24	+	32.0855	35.4184	42.6921	54.9222	23.6183	6.36051	KIFC1	44.2272	1.10388	1.33057	1.71175	0.736105	0.198236	1.37842
chr2	200526135	200526285	SGO2	33	+	27.5822	41.447	36.6885	45.3705	31.4911	38.163	SGO2	47.9128	1.50267	1.33015	1.64492	1.14172	1.38361	1.73709
chr11	65961655	65961805	SART1	168	+	82.7467	126.602	110.065	125.366	83.9762	63.6051	SART1	149.267	1.52999	1.33014	1.51506	1.01486	0.768672	1.8039
chr2	85584369	85584519	VAMP5	71	+	124.402	213.264	165.432	164.767	76.1035	63.6051	VAMP5	112.411	1.71431	1.32982	1.32447	0.611755	0.511287	0.903611
chr17	38853657	38853807	RPL23	630	-	322.543	493.596	428.922	439.378	338.529	245.94	RPL23	549.154	1.53033	1.32981	1.36223	1.04956	0.762503	1.70258
chr1	92298984	92299134	RPAP2	341	+	175.626	266.015	233.472	237.598	99.7218	114.489	RPAP2	245.092	1.51467	1.32937	1.35286	0.567808	0.651891	1.39553
chr19	42132352	42132502	POU2F2	33	-	18.5758	25.6218	24.6813	29.849	2.62426	19.0815	POU2F2	20.2708	1.37931	1.32868	1.60688	0.141273	1.02722	1.09125
chr17	35809419	35809569	TAF15	555	+	251.055	362.473	333.532	267.447	194.195	152.652	TAF15	375.931	1.4438	1.32852	1.06529	0.773516	0.608042	1.4974
chr14	103522754	103522904	CKB	569	-	321.418	359.459	426.921	549.222	330.656	383.751	CKB	595.224	1.11835	1.32824	1.70875	1.02874	1.19393	1.85187
chr8	17922750	17922900	PCM1	172	+	32.6484	36.172	43.3591	59.698	44.6124	46.6437	PCM1	112.411	1.10793	1.32806	1.82851	1.36645	1.42867	3.44308
chr10	72354856	72355006	DNAJB12	87	-	84.4354	102.487	112.067	121.784	89.2248	50.8841	DNAJB12	130.839	1.21379	1.32725	1.44233	1.05672	0.602639	1.54958
chr18	41955167	41955317	PIK3C3	156	+	70.3629	94.9514	93.3889	99.0988	78.7277	36.0429	PIK3C3	73.712	1.34945	1.32725	1.4084	1.11888	0.512243	1.0476
chr14	63852927	63853077	SYNE2	105	+	56.2903	94.1978	74.7111	89.5471	60.3579	36.0429	SYNE2	88.4544	1.67343	1.32725	1.59081	1.07226	0.640304	1.5714
chr8	66613191	66613341	MYBL1	55	-	28.1451	40.6934	37.3556	63.2799	34.1153	8.48068	MYBL1	82.926	1.44584	1.32725	2.24835	1.21212	0.30132	2.94637
chr2	218710898	218711048	TTLL4	81	+	28.1451	36.172	37.3556	60.892	36.7396	48.7639	TTLL4	71.8692	1.2852	1.32725	2.1635	1.30536	1.73259	2.55352
chr12	57240451	57240601	NDUFA4L2	98	-	14.0726	17.3324	18.6778	11.9396	49.8609	48.7639	NDUFA4L2	64.498	1.23164	1.32725	0.848429	3.54312	3.46517	4.58323
chr10	97426189	97426339	PGAM1	191	+	98.508	120.573	130.744	157.603	91.849	67.8454	PGAM1	141.896	1.22399	1.32724	1.5999	0.932401	0.68873	1.44045
chr1	1231894	1232044	SDF4	470	-	310.722	442.353	412.245	372.516	280.796	159.013	SDF4	418.316	1.42363	1.32673	1.19887	0.903689	0.511753	1.34627
chr17	64130056	64130206	ERN1	350	-	297.776	429.542	394.902	329.533	296.541	243.819	ERN1	405.416	1.4425	1.32617	1.10665	0.995853	0.8188	1.36148
chr4	94451858	94452008	PDLIM5	164	+	118.21	140.166	156.76	171.93	123.34	127.21	PDLIM5	175.066	1.18574	1.32611	1.45445	1.0434	1.07614	1.48097
chr11	10751194	10751344	CTR9	463	+	364.761	607.387	483.621	318.788	186.322	167.493	CTR9	313.276	1.66516	1.32586	0.873964	0.510806	0.459186	0.858853
chr2	200306630	200306780	SPATS2L	232	+	180.129	304.447	238.809	161.185	76.1035	44.5236	SPATS2L	123.468	1.69016	1.32577	0.894831	0.422494	0.247176	0.685442
chr4	82373906	82374056	HNRNPD	222	-	151.984	190.656	201.453	220.883	165.328	133.571	HNRNPD	248.778	1.25445	1.32549	1.45333	1.0878	0.878849	1.63687
chr15	85794818	85794968	KLHL25	215	-	162.116	253.957	214.794	170.736	81.352	67.8454	KLHL25	186.123	1.56651	1.32494	1.05317	0.501814	0.418499	1.14809
chr4	75514405	75514555	THAP6	265	+	190.824	294.651	252.817	202.973	146.958	80.5664	THAP6	217.45	1.5441	1.32487	1.06367	0.770123	0.422203	1.13953
chr15	43824606	43824756	MFAP1	216	-	109.766	169.556	145.42	124.172	76.1035	78.4463	MFAP1	184.28	1.5447	1.32482	1.13124	0.693325	0.714668	1.67884
chr7	23181952	23182102	NUPL2	212	+	119.335	153.731	158.094	173.124	136.461	86.9269	NUPL2	178.752	1.28823	1.32479	1.45074	1.14351	0.728428	1.4979
chr16	31180068	31180218	FUS	503	+	453.7	667.674	601.024	448.929	280.796	233.219	FUS	392.516	1.47162	1.32472	0.989484	0.618902	0.514038	0.865144
chr12	98593618	98593768	SLC25A3	251	+	157.613	231.35	208.791	212.525	141.71	129.33	SLC25A3	221.136	1.46784	1.32471	1.3484	0.899101	0.820554	1.40303
chr18	14132344	14132494	ZNF519	48	-	28.7081	59.533	38.0226	46.5645	47.2366	12.721	ZNF519	84.7688	2.07374	1.32446	1.622	1.64541	0.443115	2.95278
chr7	87628398	87628548	RUNDC3B	27	+	9.56935	7.53582	12.6742	8.35773	2.62426	33.9227	RUNDC3B	14.7424	0.787495	1.32446	0.873385	0.274236	3.54493	1.54059
chr12	22625132	22625282	ETNK1	469	+	311.285	495.104	412.245	371.322	265.05	209.897	ETNK1	451.486	1.59052	1.32433	1.19287	0.851471	0.674292	1.45039
chr6	31541924	31542074	DDX39B	310	-	139.037	201.96	184.11	205.361	115.467	125.09	DDX39B	195.337	1.45256	1.32418	1.47702	0.830477	0.899689	1.40493
chr6	693033	693183	EXOC2	198	-	129.468	191.41	171.435	158.797	107.595	72.0858	EXOC2	143.738	1.47843	1.32415	1.22653	0.831055	0.556785	1.11022
chr20	4686356	4686506	PRNP	222	+	191.95	246.421	254.151	173.124	181.074	161.133	PRNP	221.136	1.28378	1.32405	0.901922	0.943339	0.839453	1.15205
chr8	18210069	18210219	NAT1	105	+	105.826	177.845	140.083	120.59	47.2366	31.8025	NAT1	95.8256	1.68054	1.32371	1.13951	0.446361	0.300517	0.905501
chr9	114611239	114611389	TMEM268	128	+	43.3435	58.7794	57.3675	91.935	99.7218	80.5664	TMEM268	110.568	1.35613	1.32355	2.12108	2.30073	1.85879	2.55097
chr7	26200671	26200821	HNRNPA2B1	2850	-	896.141	1462.7	1186.04	926.514	703.301	549.124	HNRNPA2B1	1409.74	1.63222	1.3235	1.03389	0.784811	0.612765	1.57312
chr10	18651512	18651662	NSUN6	156	-	72.6145	125.848	96.0571	96.7108	73.4792	55.1244	NSUN6	117.939	1.7331	1.32284	1.33184	1.01191	0.759138	1.62418
chr4	87007183	87007333	AFF1	201	+	184.069	274.304	243.478	458.481	236.183	188.695	AFF1	272.734	1.49022	1.32275	2.49081	1.28312	1.02513	1.48169
chr17	19004087	19004237	FAM83G	139	-	38.8403	58.7794	51.3639	77.6075	41.9881	74.2059	FAM83G	40.5416	1.51336	1.32244	1.99812	1.08104	1.91054	1.0438
chr6	70667820	70667970	SMAP1	122	+	106.952	124.341	141.417	115.814	55.1094	65.7252	SMAP1	145.581	1.16259	1.32225	1.08286	0.515272	0.61453	1.36118
chr6	27807851	27808001	HIST1H2BL	581	-	150.858	254.711	199.452	198.198	188.947	163.253	HIST1H2BL	329.861	1.68842	1.32212	1.31381	1.25248	1.08216	2.18657
chr16	74296749	74296899	PSMD7	206	+	97.3822	140.166	128.743	137.306	97.0975	95.4076	PSMD7	162.166	1.43934	1.32204	1.40997	0.997076	0.979723	1.66525
chr17	21253335	21253485	NATD1	242	-	185.195	263	244.812	201.779	162.704	133.571	NATD1	197.18	1.42012	1.32191	1.08955	0.878555	0.721245	1.06472
chr12	122526867	122527017	RSRC2	558	-	316.914	437.831	418.916	385.649	257.177	271.382	RSRC2	521.512	1.38155	1.32186	1.21689	0.811504	0.856327	1.64559
chr12	10723248	10723398	YBX3	548	-	331.55	559.912	438.261	330.727	215.189	152.652	YBX3	291.162	1.68877	1.32185	0.997518	0.649039	0.460419	0.878184
chr8	6708576	6708726	AGPAT5	115	+	43.9064	44.4614	58.0345	132.53	70.855	69.9656	AGPAT5	105.04	1.01264	1.32178	3.01847	1.61377	1.59352	2.39236
chr1	89524815	89524965	LRRC8B	77	+	29.271	46.7221	38.6897	51.3403	34.1153	53.0042	LRRC8B	73.712	1.59619	1.32178	1.75396	1.1655	1.81081	2.51826
chrX	53094096	53094246	KANTR	28	+	14.6355	21.1003	19.3448	23.8792	13.1213	10.6008	KANTR	29.4848	1.44172	1.32177	1.63159	0.896539	0.724321	2.01461
chr8	96261856	96262006	PTDSS1	369	+	254.432	352.677	336.2	367.74	225.686	165.373	PTDSS1	374.088	1.38613	1.32137	1.44534	0.887019	0.649969	1.47029
chr17	16653520	16653670	ZNF624	244	-	118.21	206.482	156.093	174.318	107.595	93.2874	ZNF624	143.738	1.74674	1.32047	1.47465	0.910202	0.789167	1.21595
chr6	142946255	142946405	HIVEP2	217	-	98.508	143.934	130.077	183.87	118.092	101.768	HIVEP2	138.21	1.46114	1.32047	1.86655	1.19881	1.03309	1.40303
chr12	133080862	133081012	ZNF140	94	+	59.1048	65.5617	78.0464	85.9652	47.2366	55.1244	ZNF140	84.7688	1.10924	1.32047	1.45445	0.799201	0.932655	1.43421
chr4	6269811	6269961	WFS1	216	+	113.706	165.035	150.089	140.887	99.7218	112.369	WFS1	182.437	1.45142	1.31997	1.23905	0.877014	0.988242	1.60446
chr15	78540381	78540531	PSMA4	141	+	69.2371	109.269	91.3877	113.426	78.7277	46.6437	PSMA4	128.996	1.57819	1.31992	1.63823	1.13707	0.673681	1.86311
chr14	34462166	34462316	SPTSSA	240	-	173.937	243.407	229.47	192.228	120.716	133.571	SPTSSA	195.337	1.3994	1.31927	1.10516	0.694021	0.767927	1.12303
chr15	45402306	45402456	SPATA5L1	195	+	94.5677	138.659	124.741	121.784	70.855	65.7252	SPATA5L1	165.852	1.46624	1.31907	1.2878	0.749252	0.695007	1.75379
chr3	49723873	49724023	GMPPB	129	-	134.534	148.456	177.439	107.456	86.6005	76.3261	GMPPB	141.896	1.10348	1.31892	0.798727	0.643707	0.567337	1.05472
chr4	98929044	98929194	EIF4E	262	-	74.8661	106.255	98.7254	140.887	128.589	99.648	EIF4E	167.695	1.41927	1.31869	1.88185	1.71759	1.33102	2.23993
chr6	29005527	29005677	ZNF311	155	-	50.0984	107.762	66.0393	74.0256	62.9822	61.4849	ZNF311	82.926	2.15101	1.31819	1.4776	1.25717	1.22728	1.65526
chr17	42423179	42423329	CAVIN1	703	-	383.9	480.032	505.634	386.843	228.31	220.498	CAVIN1	339.075	1.25041	1.3171	1.00767	0.594712	0.574363	0.883238
chr17	81035076	81035226	BAIAP2	965	+	732.9	1217.79	965.241	696.079	377.893	267.141	BAIAP2	761.076	1.6616	1.31702	0.94976	0.515613	0.364499	1.03844
chr5	134176879	134177029	SKP1	179	-	247.677	345.141	326.194	312.818	181.074	163.253	SKP1	283.791	1.39351	1.31701	1.26301	0.731089	0.659137	1.14581
chr2	44168810	44168960	PPM1B	429	+	461.018	663.906	607.028	539.67	335.905	216.257	PPM1B	554.683	1.44009	1.31671	1.17061	0.728616	0.469086	1.20317
chr22	36776010	36776160	IFT27	116	-	86.1242	140.92	113.401	120.59	73.4792	63.6051	IFT27	130.839	1.63624	1.31671	1.40019	0.853177	0.738528	1.51919
chr15	90884406	90884556	FES	29	+	55.7274	100.98	73.377	64.4739	31.4911	36.0429	FES	58.9696	1.81204	1.31671	1.15695	0.565092	0.646772	1.05818
chr10	132186877	132187027	DPYSL4	107	+	91.7532	97.9657	120.738	84.7712	41.9881	46.6437	DPYSL4	130.839	1.06771	1.3159	0.923905	0.45762	0.50836	1.42599
chr11	45847410	45847560	CRY2	225	+	173.374	266.768	228.136	173.124	133.837	93.2874	CRY2	219.293	1.53869	1.31586	0.998558	0.771955	0.53807	1.26486
chr19	58002731	58002881	ZNF606	106	-	61.3564	70.0832	80.7147	102.681	78.7277	44.5236	ZNF606	130.839	1.14223	1.31551	1.67352	1.28312	0.725655	2.13244
chr17	81891502	81891652	ALYREF	195	-	102.448	140.166	134.747	187.452	149.583	95.4076	ALYREF	211.922	1.36817	1.31527	1.82973	1.46009	0.931278	2.06858
chrX	153794583	153794733	SSR4	95	+	51.2242	65.5617	67.3734	65.6678	36.7396	46.6437	SSR4	75.5548	1.2799	1.31527	1.28197	0.717231	0.910579	1.47498
chr12	56315922	56316072	CNPY2	196	-	148.606	213.264	195.45	248.344	128.589	82.6866	CNPY2	204.551	1.4351	1.31522	1.67116	0.865302	0.556415	1.37647
chr11	68841819	68841969	CPT1A	112	-	97.3822	125.848	128.076	84.7712	47.2366	74.2059	CPT1A	106.882	1.29231	1.31519	0.8705	0.485064	0.762007	1.09755
chr4	52862243	52862393	RASL11B	475	+	230.79	387.341	303.514	180.288	110.219	156.893	RASL11B	257.992	1.67833	1.31511	0.781178	0.477573	0.679808	1.11786
chr16	1420661	1420811	C16orf91	166	-	66.9855	96.4585	88.0524	106.263	99.7218	59.3647	C16orf91	101.354	1.43999	1.3145	1.58636	1.48871	0.886232	1.51307
chr2	63841823	63841973	UGP2	303	+	290.458	510.175	381.56	354.606	157.455	95.4076	UGP2	243.25	1.75645	1.31365	1.22085	0.542092	0.328473	0.83747
chr3	56801869	56802019	ARHGEF3	150	-	135.097	223.814	177.439	177.9	97.0975	65.7252	ARHGEF3	189.808	1.65669	1.31342	1.31683	0.718724	0.486504	1.40498
chr6	43629929	43630079	GTPBP2	208	-	109.203	293.897	143.419	93.1289	57.7337	89.0471	GTPBP2	178.752	2.69129	1.31332	0.852805	0.528682	0.815427	1.63688
chrX	84502361	84502511	HDX	26	-	20.8274	111.53	27.3496	31.043	10.497	8.48068	HDX	25.7992	5.35497	1.31315	1.49049	0.504	0.407189	1.23871
chrX	91434764	91434914	PABPC5	143	+	172.248	290.883	226.135	171.93	57.7337	48.7639	PABPC5	110.568	1.68875	1.31285	0.998154	0.335178	0.283103	0.641912
chrX	150983276	150983426	HMGB3	68	+	36.5887	52.7508	48.0286	40.5947	44.6124	38.163	HMGB3	81.0832	1.44172	1.31266	1.10949	1.21929	1.04303	2.21607
chr3	15427522	15427672	EAF1	175	+	88.9387	128.109	116.736	132.53	94.4733	82.6866	EAF1	141.896	1.44042	1.31254	1.49013	1.06223	0.929703	1.59544
chr10	45972442	45972592	TIMM23	166	+	104.7	149.209	137.415	148.051	123.34	86.9269	TIMM23	151.11	1.42511	1.31246	1.41405	1.17803	0.830247	1.44327
chr2	53786806	53786956	ASB3	108	-	68.1113	94.1978	89.3865	128.948	83.9762	50.8841	ASB3	116.096	1.383	1.31236	1.8932	1.23293	0.747073	1.7045
chr6	32854116	32854266	PSMB9	241	+	179.003	658.631	234.806	148.051	78.7277	48.7639	PSMB9	116.096	3.67944	1.31174	0.827087	0.439812	0.272419	0.64857
chrX	14873386	14873536	MOSPD2	146	+	100.197	174.831	131.411	99.0988	65.6064	74.2059	MOSPD2	117.939	1.74487	1.31153	0.98904	0.654774	0.7406	1.17707
chr19	9435467	9435617	ZNF266	91	-	42.2177	62.5473	55.3663	51.3403	49.8609	16.9614	ZNF266	66.3408	1.48154	1.31145	1.21608	1.18104	0.40176	1.5714
chr4	105708581	105708731	INTS12	149	-	116.521	153.731	152.758	139.693	60.3579	72.0858	INTS12	121.625	1.31934	1.31099	1.19887	0.518	0.618651	1.0438
chr1	44800297	44800447	PLK3	515	+	455.951	608.141	597.689	616.084	309.662	356.188	PLK3	630.238	1.33379	1.31086	1.35121	0.679156	0.781198	1.38225
chr19	48619099	48619249	RPL18	437	-	339.43	510.929	444.931	428.632	262.426	188.695	RPL18	503.084	1.50526	1.31082	1.2628	0.773137	0.555917	1.48214
chr2	128091171	128091321	UGGT1	122	+	74.3032	122.834	97.3913	95.5169	81.352	59.3647	UGGT1	112.411	1.65315	1.31073	1.2855	1.09487	0.798952	1.51287
chrX	104156887	104157037	SLC25A53	60	-	37.1516	42.9542	48.6956	47.7584	26.2426	23.3219	SLC25A53	53.4412	1.15619	1.31073	1.2855	0.706365	0.62775	1.43846
chr2	112645866	112646016	SLC20A1	629	+	276.948	400.152	362.883	426.244	202.068	203.536	SLC20A1	589.696	1.44486	1.31029	1.53908	0.729624	0.734925	2.12927
chr19	44846256	44846406	NECTIN2	66	+	79.9322	112.284	104.729	89.5471	81.352	59.3647	NECTIN2	90.2972	1.40474	1.31022	1.12029	1.01776	0.742688	1.12967
chr15	59689245	59689395	BNIP2	160	-	90.6274	118.312	118.737	152.827	141.71	93.2874	BNIP2	200.865	1.30548	1.31017	1.68632	1.56366	1.02935	2.21638
chr14	93332541	93332691	UNC79	73	+	59.1048	64.8081	77.3794	93.1289	39.3639	31.8025	UNC79	77.3976	1.09649	1.30919	1.57566	0.666002	0.53807	1.3095
chr10	97319210	97319360	FRAT1	273	+	242.048	289.376	316.855	241.18	199.444	175.974	FRAT1	281.948	1.19553	1.30906	0.996414	0.823985	0.727021	1.16484
chr2	111884094	111884244	ANAPC1	235	-	102.448	149.209	134.08	159.991	123.34	91.1673	ANAPC1	186.123	1.45644	1.30876	1.56168	1.20393	0.889889	1.81676
chr4	169270894	169271044	SH3RF1	199	-	194.202	288.622	254.151	177.9	86.6005	103.888	SH3RF1	169.538	1.48619	1.30869	0.916056	0.44593	0.534948	0.872998
chr2	156342411	156342561	NR4A2	317	-	253.869	347.401	332.198	360.576	241.432	220.498	NR4A2	298.534	1.36843	1.30854	1.42032	0.95101	0.86855	1.17594
chr22	28742324	28742474	CHEK2	171	-	178.44	263.754	233.472	198.198	118.092	63.6051	CHEK2	160.324	1.47811	1.30841	1.11073	0.661802	0.356451	0.898476
chr1	231241068	231241218	C1orf131	225	-	124.402	166.542	162.763	168.348	76.1035	74.2059	C1orf131	141.896	1.33874	1.30836	1.35326	0.611755	0.596501	1.14062
chr19	14206734	14206884	ADGRL1	123	-	48.9726	75.3582	64.0381	120.59	107.595	65.7252	ADGRL1	202.708	1.53878	1.30763	2.4624	2.19704	1.34208	4.13921
chr1	100896041	100896191	SLC30A7	152	+	87.25	119.82	114.068	134.918	102.346	110.249	SLC30A7	141.896	1.3733	1.30737	1.54634	1.17302	1.2636	1.62632
chr4	55853659	55853809	EXOC1	151	+	180.129	217.032	235.473	239.986	123.34	99.648	EXOC1	167.695	1.20487	1.30725	1.3323	0.684731	0.553204	0.930972
chr1	118987850	118988000	TBX15	52	-	60.2306	113.037	78.7135	118.202	49.8609	40.2832	TBX15	47.9128	1.87674	1.30687	1.96249	0.827833	0.668816	0.795489
chr1	42682355	42682505	YBX1	369	+	186.321	205.728	243.478	238.792	152.207	133.571	YBX1	241.407	1.10416	1.30677	1.28162	0.816907	0.716886	1.29565
chr16	56932074	56932224	HERPUD1	887	+	537.572	759.611	702.418	463.257	524.852	568.205	HERPUD1	810.832	1.41304	1.30665	0.861758	0.976338	1.05698	1.50832
chr9	70413855	70414005	KLF9	156	-	71.4887	159.759	93.3889	81.1893	60.3579	76.3261	KLF9	123.468	2.23474	1.30634	1.13569	0.8443	1.06767	1.7271
chr6	10412120	10412270	TFAP2A	251	-	269.631	354.937	352.209	231.628	78.7277	65.7252	TFAP2A	217.45	1.31638	1.30626	0.859056	0.291983	0.24376	0.806473
chr1	244451809	244451959	ADSS	295	-	203.771	260.739	266.158	242.374	220.438	184.455	ADSS	261.678	1.27957	1.30616	1.18944	1.08179	0.905207	1.28418
chr1	204073045	204073195	SOX13	510	+	517.871	853.809	676.402	434.602	283.42	165.373	SOX13	337.232	1.64869	1.30612	0.839209	0.547279	0.319332	0.651189
chr16	1964749	1964899	RPS2	1116	-	519.559	906.559	677.736	653.097	501.233	394.351	RPS2	960.099	1.74486	1.30444	1.25702	0.964728	0.759011	1.84791
chr11	18394497	18394647	LDHA	383	+	539.824	714.396	703.752	743.838	335.905	239.579	LDHA	571.268	1.32339	1.30367	1.37793	0.622249	0.443809	1.05825
chr15	41231112	41231262	CHP1	68	+	56.2903	70.0832	73.377	63.2799	62.9822	50.8841	CHP1	55.284	1.24503	1.30355	1.12417	1.11888	0.903959	0.982123
chr19	6737202	6737352	GPR108	89	-	33.7742	38.4327	44.0262	48.9524	39.3639	36.0429	GPR108	68.1836	1.13793	1.30355	1.4494	1.1655	1.06717	2.01881
chr16	2460050	2460200	TEDC2	32	+	16.8871	34.6648	22.0131	25.0732	39.3639	8.48068	TEDC2	46.07	2.05274	1.30355	1.48475	2.331	0.502199	2.72812
chr19	20077926	20078076	ZNF90	28	+	11.2581	17.3324	14.6754	25.0732	15.7455	6.36051	ZNF90	18.428	1.53955	1.30354	2.22713	1.39859	0.564972	1.63687
chr14	58244799	58244949	PSMA3	254	+	135.66	226.828	176.772	189.84	107.595	72.0858	PSMA3	169.538	1.67203	1.30305	1.39938	0.793123	0.531371	1.24973
chr17	5486816	5486966	MIS12	193	+	118.773	147.702	154.759	143.275	94.4733	72.0858	MIS12	158.481	1.24357	1.30298	1.20629	0.795411	0.606921	1.33432
chr2	231708465	231708615	PTMA	199	+	339.43	390.356	442.263	403.559	280.796	207.777	PTMA	375.931	1.15003	1.30296	1.18893	0.827257	0.612135	1.10754
chr14	39175160	39175310	PNN	390	+	153.11	239.639	199.452	269.835	223.062	159.013	PNN	298.534	1.56514	1.30267	1.76236	1.45687	1.03855	1.9498
chr6	159789530	159789680	TCP1	421	-	153.673	189.149	200.119	238.792	238.807	226.858	TCP1	263.52	1.23085	1.30224	1.5539	1.55399	1.47624	1.71481
chr5	115544673	115544823	FEM1C	306	-	217.843	304.447	283.502	222.077	146.958	137.811	FEM1C	267.206	1.39755	1.30141	1.01944	0.674605	0.632616	1.2266
chr6	31827664	31827814	HSPA1B	2038	+	1082.46	1520.73	1408.17	948.005	577.337	667.853	HSPA1B	996.955	1.40488	1.3009	0.875788	0.533356	0.616977	0.921009
chrX	153599057	153599207	CCNQ	186	-	149.732	217.032	194.783	182.676	146.958	110.249	CCNQ	173.223	1.44947	1.30088	1.22002	0.981474	0.736309	1.15689
chr19	10086281	10086431	C19orf66	55	+	74.8661	238.132	97.3913	117.008	73.4792	53.0042	C19orf66	68.1836	3.18077	1.30087	1.5629	0.981475	0.707987	0.910741
chr4	1289828	1289978	MAEA	265	+	138.474	196.685	180.107	148.051	118.092	99.648	MAEA	169.538	1.42037	1.30066	1.06916	0.85281	0.719615	1.22433
chr13	25301566	25301716	NUP58	238	+	138.474	168.049	180.107	278.193	175.825	129.33	NUP58	276.42	1.21358	1.30066	2.00899	1.26973	0.933966	1.99619
chr3	196867844	196867994	SENP5	673	+	623.134	847.78	810.482	803.536	495.985	328.626	SENP5	797.932	1.36051	1.30065	1.28951	0.795952	0.527376	1.28051
chr19	4723732	4723882	DPP9	185	-	86.6871	116.805	112.734	140.887	123.34	118.729	DPP9	167.695	1.34743	1.30047	1.62524	1.42282	1.36963	1.93449
chr3	167735640	167735790	SERPINI1	229	+	81.058	179.353	105.396	85.9652	81.352	59.3647	SERPINI1	151.11	2.21265	1.30025	1.06054	1.00363	0.732373	1.86422
chr6	26032011	26032161	HIST1H3B	122	-	173.937	260.739	226.135	251.926	141.71	89.0471	HIST1H3B	433.058	1.49904	1.3001	1.44837	0.81472	0.51195	2.48974
chr9	110048626	110048776	AKAP2	268	+	203.208	290.883	264.157	382.067	186.322	192.935	AKAP2	370.403	1.43145	1.29993	1.88018	0.916903	0.949446	1.82278
chr16	24539503	24539653	RBBP6	381	+	366.45	596.084	476.283	465.645	257.177	220.498	RBBP6	479.128	1.62664	1.29972	1.27069	0.701807	0.601714	1.30749
chrX	48574423	48574573	RBM3	231	+	81.6209	138.659	106.063	131.336	86.6005	93.2874	RBM3	176.909	1.69882	1.29946	1.6091	1.06101	1.14294	2.16745
chr2	152335095	152335245	FMNL2	141	+	64.1709	70.0832	83.3829	120.59	94.4733	78.4463	FMNL2	136.367	1.09213	1.29939	1.8792	1.47221	1.22246	2.12506
chr1	156728420	156728570	RRNAD1	155	+	93.4419	118.312	121.406	134.918	65.6064	61.4849	RRNAD1	119.782	1.26616	1.29927	1.44387	0.702109	0.658001	1.28189
chr10	109923349	109923499	XPNPEP1	194	-	204.897	271.29	266.158	397.589	199.444	222.618	XPNPEP1	305.905	1.32403	1.29898	1.94043	0.973387	1.08649	1.49297
chr13	31846690	31846840	FRY	48	+	64.7338	69.3296	84.05	109.844	52.4852	46.6437	FRY	88.4544	1.071	1.29839	1.69686	0.810785	0.720546	1.36643
chr11	47578994	47579144	NDUFS3	115	+	82.7467	124.341	107.397	101.487	89.2248	76.3261	NDUFS3	160.324	1.50267	1.2979	1.22648	1.07829	0.922407	1.93753
chrX	134460148	134460298	HPRT1	80	+	59.1048	72.3439	76.7123	56.1162	52.4852	48.7639	HPRT1	73.712	1.22399	1.2979	0.949436	0.888002	0.825041	1.24714
chr22	38570073	38570223	DMC1	52	-	23.6419	30.8969	30.6849	58.5041	39.3639	33.9227	DMC1	38.6988	1.30687	1.2979	2.47459	1.66501	1.43486	1.63687
chr8	11466676	11466826	FAM167A	35	-	11.821	14.3181	15.3425	15.5215	10.497	27.5622	FAM167A	31.3276	1.21124	1.2979	1.31304	0.887996	2.33163	2.65016
chr1	230426253	230426403	PGBD5	23	-	11.821	11.3037	15.3425	9.55169	10.497	42.4034	PGBD5	20.2708	0.956239	1.2979	0.808027	0.887996	3.58712	1.71481
chr2	64144333	64144483	PELI1	286	-	254.432	318.765	330.196	226.853	136.461	127.21	PELI1	213.765	1.25285	1.29778	0.891606	0.536336	0.499976	0.840166
chr3	53891780	53891930	SELENOK	217	-	154.235	204.221	200.119	154.021	73.4792	97.5278	SELENOK	169.538	1.32409	1.29749	0.998613	0.476411	0.632332	1.09922
chr8	6406567	6406717	MCPH1	184	+	113.143	152.977	146.754	195.81	83.9762	65.7252	MCPH1	191.651	1.35207	1.29707	1.73064	0.742213	0.580904	1.69388
chr3	15601481	15601631	HACL1	138	-	71.4887	92.6906	92.7218	68.0558	68.2307	42.4034	HACL1	88.4544	1.29658	1.29701	0.95198	0.954426	0.593148	1.23732
chr5	149960782	149960932	SLC26A2	148	+	59.6677	96.4585	77.3794	105.069	62.9822	69.9656	SLC26A2	93.9828	1.61659	1.29684	1.7609	1.05555	1.17259	1.5751
chr1	200669842	200669992	DDX59	58	-	29.8339	44.4614	38.6897	39.4007	49.8609	38.163	DDX59	40.5416	1.4903	1.29684	1.32067	1.67128	1.27918	1.35891
chr19	9538534	9538684	ZNF426	192	-	83.8725	114.545	108.731	102.681	62.9822	50.8841	ZNF426	136.367	1.3657	1.29638	1.22425	0.750928	0.606684	1.62588
chr3	186783504	186783654	EIF4A2	1460	+	967.067	1584.03	1253.41	869.204	532.724	493.999	EIF4A2	856.902	1.63797	1.29609	0.898804	0.550866	0.510822	0.886083
chr1	226407991	226408141	PARP1	170	-	90.6274	124.341	117.403	133.724	70.855	65.7252	PARP1	134.524	1.372	1.29545	1.47554	0.781828	0.725224	1.48436
chr19	46714224	46714374	PRKD2	25	-	24.2048	69.3296	31.352	31.043	13.1213	4.24034	PRKD2	25.7992	2.86429	1.29528	1.28251	0.542095	0.175186	1.06587
chr2	200811848	200811998	BZW1	307	+	133.408	189.903	172.769	235.21	136.461	103.888	BZW1	267.206	1.42348	1.29504	1.76309	1.02288	0.778724	2.00292
chr22	28741987	28742137	HSCB	238	+	109.203	165.788	141.417	159.991	91.849	78.4463	HSCB	187.966	1.51816	1.29499	1.46508	0.841085	0.718353	1.72125
chr6	32838672	32838822	TAP2	32	-	54.6016	180.106	70.7087	57.3101	36.7396	25.442	TAP2	57.1268	3.29855	1.29499	1.0496	0.672867	0.465957	1.04625
chr16	69762490	69762640	WWP2	210	+	151.984	159.759	196.784	228.047	128.589	95.4076	WWP2	199.022	1.05116	1.29477	1.50047	0.846069	0.627748	1.30949
chrX	111681591	111681741	ALG13	204	+	66.9855	101.734	86.7182	89.5471	78.7277	72.0858	ALG13	90.2972	1.51875	1.29458	1.33681	1.17529	1.07614	1.34801
chrX	24025213	24025363	KLHL15	598	-	390.092	579.505	504.967	340.279	249.304	180.214	KLHL15	346.446	1.48556	1.29448	0.872304	0.63909	0.461978	0.888114
chrX	49123644	49123794	GPKOW	74	-	36.5887	45.9685	47.3615	40.5947	34.1153	42.4034	GPKOW	46.07	1.25636	1.29443	1.10949	0.9324	1.15892	1.25913
chr11	849781	849931	TSPAN4	44	+	42.7806	36.9255	55.3663	32.2369	18.3698	19.0815	TSPAN4	55.284	0.863137	1.29419	0.75354	0.429396	0.446032	1.29227
chr2	178194442	178194592	OSBPL6	104	+	61.3564	91.937	79.3805	101.487	83.9762	89.0471	OSBPL6	141.896	1.49841	1.29376	1.65406	1.36866	1.45131	2.31265
chr16	87492937	87493087	ZCCHC14	240	-	258.935	353.43	334.866	263.865	170.577	171.734	ZCCHC14	298.534	1.36494	1.29324	1.01904	0.658764	0.663232	1.15293
chr22	50532094	50532244	ODF3B	36	-	24.7677	65.5617	32.019	31.043	23.6183	19.0815	ODF3B	35.0132	2.64706	1.29277	1.25337	0.953593	0.770419	1.41366
chr10	14604321	14604471	FAM107B	736	-	672.106	759.611	868.517	630.411	398.887	315.905	FAM107B	558.368	1.1302	1.29223	0.937964	0.593488	0.470023	0.830774
chr7	102671571	102671721	POLR2J2	293	-	162.679	264.507	210.125	229.24	107.595	99.648	POLR2J2	259.835	1.62594	1.29165	1.40916	0.661395	0.612544	1.59723
chr12	123436399	123436549	RILPL2	55	-	43.9064	51.9972	56.7004	64.4739	49.8609	33.9227	RILPL2	71.8692	1.18427	1.29139	1.46844	1.13562	0.772614	1.63687
chr3	44648675	44648825	ZNF35	167	+	81.6209	125.848	105.396	124.172	118.092	84.8068	ZNF35	160.324	1.54186	1.29129	1.52133	1.44684	1.03903	1.96425
chr12	51048253	51048403	LETMD1	109	+	106.952	118.312	138.082	154.021	83.9762	65.7252	LETMD1	162.166	1.10622	1.29107	1.44009	0.785177	0.61453	1.51625
chr3	139389553	139389703	COPB2	223	-	169.997	211.003	219.464	167.155	133.837	76.3261	COPB2	202.708	1.24122	1.29099	0.983282	0.78729	0.448985	1.19242
chr6	138107354	138107504	PERP	194	-	220.658	251.696	284.836	292.52	152.207	103.888	PERP	234.036	1.14066	1.29085	1.32567	0.689787	0.47081	1.06063
chr7	127585499	127585649	GCC1	273	-	126.09	152.224	162.763	139.693	102.346	76.3261	GCC1	160.324	1.20726	1.29085	1.10788	0.81169	0.60533	1.2715
chr16	70523744	70523894	SF3B3	196	+	88.3758	127.355	114.068	174.318	104.97	86.9269	SF3B3	200.865	1.44106	1.29072	1.97246	1.18777	0.983605	2.27285
chr7	75878966	75879116	RHBDD2	319	+	347.311	380.559	448.267	311.624	204.692	161.133	RHBDD2	276.42	1.09573	1.29068	0.897248	0.589362	0.463944	0.795886
chr14	29927739	29927889	PRKD1	71	-	82.1838	97.9657	106.063	97.9048	49.8609	33.9227	PRKD1	70.0264	1.19203	1.29056	1.19129	0.6067	0.412766	0.852071
chr6	109690988	109691138	AK9	69	-	75.9919	107.009	98.0583	62.086	36.7396	25.442	AK9	95.8256	1.40816	1.29038	0.817008	0.483467	0.334799	1.261
chr6	26402215	26402365	BTN3A1	23	+	25.3306	75.3582	32.6861	15.5215	7.87277	8.48068	BTN3A1	22.1136	2.97499	1.29038	0.612757	0.310801	0.3348	0.872999
chr4	2469062	2469212	RNF4	167	+	120.461	149.209	155.426	189.84	104.97	82.6866	RNF4	191.651	1.23865	1.29026	1.57595	0.871402	0.686418	1.59098
chr1	161045841	161045991	USF1	189	-	127.216	223.814	164.098	165.961	94.4733	95.4076	USF1	197.18	1.75932	1.28992	1.30456	0.742621	0.749965	1.54996
chr3	42804384	42804534	HIGD1A	239	-	153.11	213.264	197.451	201.779	131.213	122.97	HIGD1A	219.293	1.39288	1.2896	1.31787	0.856985	0.803148	1.43226
chr6	149746444	149746594	NUP43	85	-	38.2774	52.7508	49.3627	70.4437	62.9822	33.9227	NUP43	53.4412	1.37812	1.2896	1.84035	1.64541	0.886233	1.39616
chr20	35172013	35172163	PROCR	37	+	51.2242	137.906	66.0393	31.043	15.7455	14.8412	PROCR	57.1268	2.6922	1.28922	0.606022	0.307384	0.28973	1.11523
chr12	75511542	75511692	KRR1	164	-	83.3096	126.602	107.397	115.814	97.0975	57.2446	KRR1	138.21	1.51966	1.28913	1.39016	1.1655	0.687131	1.65899
chr11	65314810	65314960	CDC42EP2	290	+	230.79	296.911	297.51	263.865	212.565	139.931	CDC42EP2	335.39	1.2865	1.28909	1.14331	0.921032	0.606313	1.45323
chr6	116668704	116668854	ZUP1	98	-	32.0855	43.7078	41.3579	60.892	55.1094	42.4034	ZUP1	73.712	1.36223	1.28899	1.8978	1.71758	1.32158	2.29736
chr11	14499743	14499893	COPB1	447	-	476.216	672.195	613.698	476.39	320.159	214.137	COPB1	410.944	1.41153	1.2887	1.00037	0.672298	0.449664	0.862936
chr1	32650461	32650611	ZBTB8OS	217	-	90.6274	129.616	116.736	127.754	94.4733	84.8068	ZBTB8OS	189.808	1.43021	1.28809	1.40966	1.04244	0.935774	2.09438
chr14	87992760	87992910	GALC	211	-	64.7338	102.487	83.3829	112.232	73.4792	57.2446	GALC	101.354	1.58321	1.28809	1.73375	1.1351	0.884308	1.5657
chr19	58033992	58034142	ZSCAN1	143	+	64.7338	61.0402	83.3829	154.021	99.7218	99.648	ZSCAN1	235.878	0.942942	1.28809	2.3793	1.54049	1.53935	3.64382
chr16	67000490	67000640	CES4A	35	+	12.9468	16.5788	16.6766	22.6853	23.6183	12.721	CES4A	25.7992	1.28053	1.28809	1.75219	1.82426	0.982559	1.99271
chr7	133081988	133082138	CHCHD3	203	-	162.116	193.671	208.791	267.447	144.334	97.5278	CHCHD3	186.123	1.19464	1.28791	1.64973	0.890313	0.601593	1.14809
chr15	74873271	74873421	SCAMP2	163	-	136.223	162.02	175.438	155.215	78.7277	91.1673	SCAMP2	158.481	1.18937	1.28787	1.13942	0.577933	0.66925	1.16339
chrX	107000131	107000281	MORC4	106	-	97.3822	118.312	125.408	113.426	62.9822	67.8454	MORC4	68.1836	1.21492	1.28779	1.16475	0.646753	0.696692	0.700165
chr4	67545398	67545548	CENPC	134	-	117.084	179.353	150.756	125.366	83.9762	72.0858	CENPC	136.367	1.53183	1.28759	1.07074	0.71723	0.615676	1.16469
chr3	122383251	122383401	FAM162A	127	+	78.2435	88.9227	100.727	127.754	49.8609	59.3647	FAM162A	101.354	1.13649	1.28735	1.63277	0.637253	0.758717	1.29537
chr7	87152518	87152668	DMTF1	111	+	65.2967	73.0975	84.05	113.426	73.4792	61.4849	DMTF1	125.31	1.11947	1.2872	1.73709	1.12531	0.941623	1.91909
chr5	64768582	64768732	SREK1IP1	65	-	65.2967	76.8654	84.05	88.3531	55.1094	42.4034	SREK1IP1	116.096	1.17717	1.2872	1.3531	0.843984	0.649396	1.77798
chr10	98134594	98134744	R3HCC1L	276	+	159.302	221.553	204.788	164.767	115.467	91.1673	R3HCC1L	248.778	1.39077	1.28553	1.03431	0.724831	0.572292	1.56168
chr2	66435055	66435205	MEIS1	307	+	292.71	453.657	376.224	279.387	149.583	118.729	MEIS1	211.922	1.54985	1.28531	0.954484	0.511028	0.40562	0.724
chr17	41734568	41734718	HAP1	427	-	113.706	186.135	146.087	162.379	128.589	125.09	HAP1	239.564	1.63698	1.28478	1.42806	1.13089	1.10012	2.10687
chr10	124418847	124418997	OAT	475	-	422.74	602.112	542.99	380.874	230.935	212.017	OAT	357.503	1.42431	1.28445	0.900965	0.546281	0.50153	0.845681
chr6	26285459	26285609	HIST1H4H	1072	-	396.284	704.599	508.969	407.141	590.458	438.875	HIST1H4H	536.255	1.77802	1.28435	1.0274	1.48999	1.10748	1.35321
chr4	184649371	184649521	CASP3	458	-	302.279	464.207	388.231	312.818	165.328	142.051	CASP3	331.704	1.53569	1.28435	1.03487	0.546938	0.469933	1.09734
chr1	11654829	11654979	FBXO44	149	+	107.514	162.774	138.082	167.155	133.837	63.6051	FBXO44	186.123	1.51398	1.28432	1.55473	1.24483	0.591598	1.73115
chr7	101085403	101085553	TRIM56	203	+	121.587	283.347	156.093	117.008	102.346	74.2059	TRIM56	97.6684	2.33041	1.2838	0.96234	0.841751	0.610311	0.80328
chr15	65517599	65517749	DPP8	200	-	108.64	150.716	139.416	151.633	102.346	74.2059	DPP8	175.066	1.3873	1.28328	1.39574	0.942066	0.683044	1.61143
chr12	98515594	98515744	TMPO	100	+	54.6016	75.3582	70.0417	84.7712	70.855	42.4034	TMPO	99.5112	1.38015	1.28278	1.55254	1.29767	0.776596	1.8225
chr1	25247378	25247528	RSRP1	987	-	349	519.972	447.6	322.369	215.189	205.656	RSRP1	375.931	1.48989	1.28252	0.923693	0.616587	0.589272	1.07717
chr10	73247175	73247325	DNAJC9	187	-	109.766	155.992	140.75	194.616	144.334	163.253	DNAJC9	245.092	1.42113	1.28227	1.77301	1.31492	1.48728	2.23286
chr9	35161958	35162108	UNC13B	131	+	96.2564	143.934	123.407	128.948	115.467	65.7252	UNC13B	127.153	1.49532	1.28207	1.33963	1.19958	0.682814	1.32098
chr8	66667109	66667259	VCPIP1	70	-	75.9919	129.616	97.3913	82.3833	44.6124	63.6051	VCPIP1	88.4544	1.70566	1.2816	1.08411	0.587068	0.836998	1.164
chr14	64540667	64540817	HSPA2	296	+	278.074	418.992	356.212	272.223	136.461	116.609	HSPA2	263.52	1.50676	1.281	0.978959	0.490736	0.419345	0.947661
chr10	43397150	43397300	HNRNPF	188	-	69.8	88.1691	89.3865	189.84	141.71	180.214	HNRNPF	287.477	1.26317	1.28061	2.71977	2.03023	2.58186	4.11858
chr17	36534821	36534971	MYO19	93	-	83.8725	98.7193	107.397	122.978	52.4852	40.2832	MYO19	132.682	1.17702	1.28048	1.46625	0.625774	0.480291	1.58195
chr13	32428051	32428201	N4BP2L1	69	-	77.1177	112.284	98.7254	91.935	34.1153	46.6437	N4BP2L1	60.8124	1.45601	1.28019	1.19214	0.44238	0.604838	0.788566
chr1	213015393	213015543	ANGEL2	172	-	196.453	253.204	251.483	226.853	99.7218	95.4076	ANGEL2	193.494	1.28888	1.28012	1.15474	0.507611	0.485651	0.984938
chr5	73448650	73448800	FOXD1	514	-	294.961	415.977	377.558	229.24	149.583	154.772	FOXD1	320.647	1.41028	1.28003	0.777187	0.507128	0.52472	1.08708
chr2	53767751	53767901	CHAC2	85	+	42.2177	76.8654	54.0321	88.3531	65.6064	57.2446	CHAC2	79.2404	1.82069	1.27984	2.0928	1.554	1.35594	1.87695
chr21	37366012	37366162	DYRK1A	57	+	14.0726	25.6218	18.0107	15.5215	18.3698	12.721	DYRK1A	44.2272	1.82069	1.27984	1.10296	1.30536	0.903955	3.14279
chr6	43635782	43635932	MAD2L1BP	154	+	106.389	178.599	136.081	140.887	91.849	93.2874	MAD2L1BP	136.367	1.67874	1.27909	1.32426	0.863332	0.876852	1.28178
chr8	15540188	15540338	TUSC3	159	+	42.7806	82.8941	54.6992	48.9524	26.2426	29.6824	TUSC3	57.1268	1.93766	1.2786	1.14427	0.613423	0.693829	1.33534
chr7	54759133	54759283	SEC61G	245	-	164.368	211.003	210.125	157.603	86.6005	89.0471	SEC61G	176.909	1.28372	1.27838	0.958842	0.52687	0.541754	1.0763
chr19	18636941	18637091	KLHL26	79	+	57.4161	97.2121	73.377	74.0256	52.4852	46.6437	KLHL26	81.0832	1.69312	1.27799	1.28928	0.91412	0.81238	1.4122
chr1	100352429	100352579	CDC14A	152	+	122.15	170.31	156.093	154.021	73.4792	74.2059	CDC14A	134.524	1.39427	1.27788	1.26092	0.601549	0.607498	1.1013
chr2	161308399	161308549	PSMD14	257	+	93.4419	124.341	119.404	170.736	62.9822	86.9269	PSMD14	151.11	1.33068	1.27784	1.82719	0.674025	0.930278	1.61715
chr2	197500311	197500461	HSPE1	392	+	237.545	266.015	303.514	366.546	249.304	190.815	HSPE1	326.176	1.11985	1.27771	1.54306	1.0495	0.803279	1.37311
chr2	197500311	197500461	HSPE1-MOB4	392	+	237.545	266.015	303.514	366.546	249.304	190.815	HSPE1-MOB4	326.176	1.11985	1.27771	1.54306	1.0495	0.803279	1.37311
chr22	39520489	39520639	ATF4	1060	+	498.732	758.104	637.046	447.735	354.275	298.944	ATF4	654.194	1.52006	1.27733	0.897747	0.710351	0.599408	1.31171
chr4	5708490	5708640	EVC2	327	-	390.655	467.221	498.963	524.149	262.426	161.133	EVC2	392.516	1.19599	1.27725	1.34172	0.671759	0.412469	1.00476
chr2	55232617	55232767	RPS27A	384	+	267.942	414.47	342.204	323.563	215.189	108.129	RPS27A	346.446	1.54686	1.27716	1.20759	0.803118	0.403554	1.29299
chr5	73498373	73498523	BTF3	243	+	108.64	113.037	138.749	162.379	136.461	101.768	BTF3	158.481	1.04047	1.27714	1.49465	1.25608	0.936745	1.45877
chr14	73886788	73886938	ZNF410	145	+	115.958	142.427	148.088	187.452	115.467	108.129	ZNF410	180.594	1.22826	1.27708	1.61655	0.995766	0.932484	1.55741
chr7	65373797	65373947	ZNF92	154	+	109.766	143.934	140.083	138.499	65.6064	42.4034	ZNF92	187.966	1.31128	1.2762	1.26177	0.597693	0.386307	1.71242
chr9	27573351	27573501	C9orf72	87	-	43.9064	61.7937	56.0333	64.4739	47.2366	61.4849	C9orf72	103.197	1.4074	1.2762	1.46844	1.07585	1.40036	2.35039
chr7	151410611	151410761	WDR86	21	-	7.31774	9.04299	9.33889	4.77584	13.1213	2.12017	WDR86	5.5284	1.23576	1.2762	0.652639	1.79308	0.28973	0.755479
chr10	74826526	74826676	KAT6B	162	+	95.6935	162.774	122.073	74.0256	57.7337	40.2832	KAT6B	106.882	1.70099	1.27567	0.77357	0.603319	0.420961	1.11692
chr9	112486795	112486945	KIAA1958	55	+	73.7403	68.576	94.0559	133.724	91.849	82.6866	KIAA1958	112.411	0.929966	1.2755	1.81345	1.24557	1.12132	1.52442
chr5	2751582	2751732	IRX2	494	-	664.225	944.992	847.171	587.429	372.645	301.064	IRX2	490.185	1.4227	1.27543	0.884383	0.561022	0.453256	0.73798
chr3	51391227	51391377	RBM15B	292	+	185.758	204.974	236.808	316.4	186.322	116.609	RBM15B	320.647	1.10345	1.27482	1.70329	1.00304	0.627747	1.72615
chr19	38899508	38899658	SIRT2	136	-	74.3032	110.023	94.723	77.6075	76.1035	53.0042	SIRT2	132.682	1.48073	1.27482	1.04447	1.02423	0.71335	1.78568
chr11	3379089	3379239	ZNF195	231	-	179.003	241.9	228.136	238.792	173.201	137.811	ZNF195	239.564	1.35137	1.27448	1.33401	0.967587	0.769881	1.33832
chr6	39934386	39934536	MOCS1	301	-	194.764	238.886	248.148	249.538	133.837	125.09	MOCS1	213.765	1.22654	1.2741	1.28123	0.687175	0.642264	1.09756
chr7	44796607	44796757	PPIA	717	+	359.695	495.857	458.273	390.425	238.807	220.498	PPIA	558.368	1.37855	1.27406	1.08543	0.663915	0.613014	1.55234
chr22	38201984	38202134	MAFF	364	+	239.797	329.315	305.515	265.059	188.947	171.734	MAFF	269.049	1.37331	1.27406	1.10535	0.787946	0.716164	1.12199
chr22	40857044	40857194	XPNPEP3	185	+	112.581	149.209	143.419	132.53	97.0975	76.3261	XPNPEP3	138.21	1.32535	1.27392	1.1772	0.862468	0.677966	1.22765
chr7	151341727	151341877	NUB1	126	+	82.7467	115.298	105.396	103.875	70.855	48.7639	NUB1	99.5112	1.39338	1.27372	1.25534	0.856288	0.589315	1.2026
chr10	72692069	72692219	MCU	355	+	263.439	363.98	335.533	213.719	149.583	89.0471	MCU	210.079	1.38165	1.27366	0.811266	0.567809	0.338018	0.797448
chr4	82900438	82900588	SEC31A	224	-	105.826	149.963	134.747	139.693	125.964	99.648	SEC31A	176.909	1.41707	1.27329	1.32003	1.19029	0.941621	1.6717
chr11	119057096	119057246	HYOU1	301	-	136.785	189.149	174.104	197.004	131.213	129.33	HYOU1	167.695	1.38282	1.27283	1.44025	0.959265	0.945498	1.22598
chr16	56451255	56451405	NUDT21	126	-	68.6742	98.7193	87.3853	103.875	97.0975	103.888	NUDT21	158.481	1.4375	1.27246	1.51258	1.41389	1.51277	2.30772
chr4	82429350	82429500	HNRNPDL	385	-	329.861	471.743	419.583	395.201	262.426	222.618	HNRNPDL	416.473	1.43013	1.272	1.19808	0.795565	0.674884	1.26257
chr3	179148284	179148434	PIK3CA	194	+	176.752	260.739	224.8	224.465	73.4792	63.6051	PIK3CA	164.009	1.47517	1.27184	1.26994	0.415719	0.359855	0.927905
chr13	110713625	110713775	ING1	289	+	230.79	429.542	293.508	175.512	81.352	91.1673	ING1	234.036	1.86118	1.27175	0.760484	0.352494	0.395023	1.01406
chr1	110390963	110391113	SLC16A4	20	-	23.079	42.9542	29.3508	20.2973	20.9941	16.9614	SLC16A4	27.642	1.86118	1.27175	0.879471	0.909662	0.734928	1.19771
chr3	126655014	126655164	TXNRD3	355	-	238.671	317.258	303.514	311.624	241.432	184.455	TXNRD3	322.49	1.32927	1.27168	1.30566	1.01157	0.772842	1.35119
chr22	17084943	17085093	IL17RA	292	+	192.513	240.393	244.812	194.616	207.316	101.768	IL17RA	200.865	1.24871	1.27166	1.01092	1.07689	0.528629	1.04338
chr19	16628134	16628284	MED26	282	-	278.074	332.33	353.544	334.309	194.195	156.893	MED26	423.844	1.19511	1.2714	1.20223	0.698357	0.564213	1.52421
chr2	191678063	191678213	NABP1	601	+	401.913	657.124	510.971	390.425	230.935	239.579	NABP1	385.145	1.63499	1.27135	0.971417	0.57459	0.596097	0.95828
chr20	40689161	40689311	MAFB	301	-	721.642	1030.9	917.212	780.85	419.881	493.999	MAFB	727.906	1.42855	1.27101	1.08205	0.581841	0.684549	1.00868
chr5	176416456	176416606	CLTB	297	-	101.323	149.963	128.743	136.112	86.6005	65.7252	CLTB	114.254	1.48005	1.27062	1.34335	0.854697	0.64867	1.12762
chr2	222298925	222299075	PAX3	144	-	257.81	352.677	327.528	309.236	191.571	116.609	PAX3	293.005	1.36797	1.27042	1.19947	0.74307	0.452306	1.13652
chr6	110874711	110874861	AMD1	866	+	711.509	1085.16	903.871	803.536	503.857	379.51	AMD1	807.146	1.52515	1.27036	1.12934	0.708153	0.533387	1.13441
chr8	10839773	10839923	PINX1	146	-	70.3629	105.502	89.3865	99.0988	94.4733	67.8454	PINX1	143.738	1.4994	1.27036	1.4084	1.34266	0.964221	2.04281
chr6	89352666	89352816	UBE2J1	204	-	354.629	427.281	450.268	495.494	236.183	163.253	UBE2J1	342.761	1.20487	1.26969	1.39722	0.666	0.460349	0.966534
chr22	30694838	30694988	OSBP2	26	+	7.88064	9.04299	10.006	11.9396	26.2426	19.0815	OSBP2	29.4848	1.14749	1.26969	1.51505	3.33001	2.42131	3.74142
chr3	101849441	101849591	NFKBIZ	754	+	784.124	1225.32	995.259	803.536	440.875	428.274	NFKBIZ	635.766	1.56266	1.26926	1.02476	0.562252	0.546181	0.810798
chr22	33920939	33921089	LARGE1	359	-	380.522	617.937	482.954	382.067	207.316	173.854	LARGE1	316.962	1.62392	1.26919	1.00406	0.54482	0.456883	0.832966
chr7	103075081	103075231	ARMC10	137	+	87.25	128.109	110.733	140.887	73.4792	63.6051	ARMC10	105.04	1.4683	1.26915	1.61475	0.842168	0.728998	1.2039
chr19	52570216	52570366	ZNF701	396	+	294.398	417.485	373.556	303.266	165.328	139.931	ZNF701	217.45	1.4181	1.26888	1.03012	0.56158	0.475312	0.738626
chr20	1118563	1118713	PSMF1	195	+	112.018	142.427	142.085	128.948	86.6005	72.0858	PSMF1	127.153	1.27147	1.26841	1.15114	0.773095	0.64352	1.13511
chr16	10385985	10386135	ATF7IP2	158	+	88.3758	150.716	112.067	83.5773	60.3579	29.6824	ATF7IP2	128.996	1.7054	1.26807	0.945703	0.682969	0.335866	1.45963
chr19	52028298	52028448	ZNF614	115	-	88.3758	107.762	112.067	107.456	60.3579	42.4034	ZNF614	86.6116	1.21936	1.26807	1.2159	0.682969	0.479808	0.980038
chrX	153971751	153971901	HCFC1	34	-	24.2048	26.3754	30.6849	53.7282	31.4911	21.2017	HCFC1	40.5416	1.08968	1.26772	2.21973	1.30103	0.87593	1.67494
chr6	56843547	56843697	DST	94	-	81.058	99.4729	102.728	128.948	81.352	74.2059	DST	143.738	1.22718	1.26734	1.59081	1.00363	0.915467	1.77327
chr8	9555846	9555996	TNKS	244	+	122.15	178.599	154.759	154.021	112.843	95.4076	TNKS	160.324	1.46213	1.26696	1.26092	0.923807	0.781069	1.31252
chr13	94596150	94596300	TGDS	285	-	187.447	238.886	237.475	241.18	181.074	118.729	TGDS	200.865	1.27442	1.26689	1.28666	0.966001	0.6334	1.07158
chr10	103245911	103246061	RPEL1	28	+	16.3242	25.6218	20.679	19.1034	13.1213	10.6008	RPEL1	11.0568	1.56956	1.26677	1.17025	0.803794	0.649392	0.677326
chr4	4290181	4290331	ZBTB49	277	+	236.982	302.94	300.179	271.029	167.952	97.5278	ZBTB49	243.25	1.27832	1.26667	1.14367	0.708712	0.411541	1.02645
chrX	109537140	109537290	NXT2	50	+	41.0919	64.8081	52.0309	40.5947	23.6183	25.442	NXT2	57.1268	1.57715	1.26621	0.9879	0.574768	0.619149	1.39022
chrX	123860082	123860232	XIAP	63	+	24.7677	33.1576	31.352	34.6249	31.4911	44.5236	XIAP	57.1268	1.33874	1.26584	1.39799	1.27146	1.79765	2.3065
chr18	24138987	24139137	CABYR	950	+	1015.48	1828.94	1285.43	809.505	307.038	360.429	CABYR	598.91	1.80106	1.26583	0.797165	0.302358	0.354935	0.58978
chr19	53158942	53159092	ZNF347	243	-	149.169	183.874	188.779	170.736	86.6005	61.4849	ZNF347	169.538	1.23266	1.26554	1.14458	0.580553	0.412183	1.13655
chr15	37100349	37100499	MEIS2	129	-	133.408	197.439	168.767	117.008	78.7277	46.6437	MEIS2	112.411	1.47996	1.26504	0.877069	0.590127	0.349632	0.842611
chrX	47659054	47659204	UXT	70	-	50.0984	55.7651	63.371	74.0256	44.6124	29.6824	UXT	99.5112	1.11311	1.26493	1.4776	0.890496	0.592482	1.98631
chr9	101398527	101398677	MRPL50	165	-	117.647	166.542	148.755	144.469	120.716	48.7639	MRPL50	152.952	1.41561	1.26442	1.22799	1.02609	0.414493	1.30009
chr2	11465771	11465921	E2F6	67	-	50.6613	76.8654	64.0381	68.0558	47.2366	44.5236	E2F6	49.7556	1.51724	1.26404	1.34335	0.9324	0.878848	0.982122
chr19	11346480	11346630	CCDC159	64	+	25.3306	40.6934	32.019	20.2973	41.9881	21.2017	CCDC159	20.2708	1.60649	1.26404	0.801296	1.6576	0.837	0.80025
chr19	45076405	45076555	ZNF296	125	-	16.8871	14.3181	21.346	37.0128	73.4792	55.1244	ZNF296	58.9696	0.847872	1.26404	2.19178	4.3512	3.26429	3.49199
chr12	4649062	4649212	NDUFA9	165	+	101.885	175.585	128.743	125.366	125.964	80.5664	NDUFA9	186.123	1.72336	1.26361	1.23047	1.23634	0.790758	1.82679
chr8	60516906	60517056	RAB2A	406	+	204.897	255.464	258.821	219.689	160.08	114.489	RAB2A	257.992	1.24679	1.26318	1.07219	0.781271	0.558764	1.25913
chr7	99919451	99919601	TRIM4	222	-	153.673	217.032	194.115	219.689	128.589	95.4076	TRIM4	211.922	1.4123	1.26317	1.42959	0.83677	0.620848	1.37905
chr6	170584551	170584701	PDCD2	336	-	188.01	241.146	237.475	311.624	191.571	186.575	PDCD2	329.861	1.28262	1.2631	1.65749	1.01894	0.992367	1.75449
chr22	28772668	28772818	CCDC117	222	+	189.135	220.8	238.809	189.84	136.461	116.609	CCDC117	165.852	1.16742	1.26264	1.00373	0.721501	0.616538	0.876897
chr12	56688153	56688303	PTGES3	145	-	138.474	155.238	174.771	156.409	181.074	110.249	PTGES3	239.564	1.12106	1.26212	1.12952	1.30764	0.796171	1.73003
chr17	82458665	82458815	NARF	198	+	216.718	323.287	273.496	257.896	183.698	144.172	NARF	267.206	1.49174	1.26199	1.19001	0.847636	0.665252	1.23297
chr1	77979011	77979161	FUBP1	179	-	113.143	162.02	142.752	136.112	136.461	89.0471	FUBP1	199.022	1.43199	1.2617	1.20301	1.20609	0.787031	1.75903
chr10	100987478	100987628	TWNK	72	+	34.9	31.6505	44.0262	42.9826	44.6124	27.5622	TWNK	51.5984	0.906891	1.2615	1.23159	1.27829	0.789748	1.47846
chr1	44807280	44807430	TCTEX1D4	48	-	17.45	23.3611	22.0131	39.4007	28.8668	10.6008	TCTEX1D4	27.642	1.33874	1.2615	2.25792	1.65426	0.607496	1.58407
chr17	34040257	34040407	ASIC2	98	-	43.9064	68.576	55.3663	71.6377	47.2366	40.2832	ASIC2	90.2972	1.56187	1.26101	1.6316	1.07585	0.917479	2.05658
chr3	9649429	9649579	MTMR14	158	+	79.3693	90.4299	100.06	83.5773	31.4911	78.4463	MTMR14	112.411	1.13936	1.26069	1.05302	0.396767	0.988371	1.4163
chr20	37179467	37179617	MROH8	26	-	26.4564	24.8682	33.3532	46.5645	28.8668	27.5622	MROH8	44.2272	0.939969	1.26069	1.76005	1.09111	1.0418	1.6717
chr19	46625009	46625159	PTGIR	42	-	53.4758	124.341	67.3734	54.9222	18.3698	21.2017	PTGIR	38.6988	2.32518	1.25989	1.02705	0.343516	0.396473	0.723669
chr12	123972736	123972886	CCDC92	261	-	142.977	228.335	180.107	121.784	104.97	99.648	CCDC92	175.066	1.59701	1.25969	0.851773	0.734174	0.696951	1.22443
chr4	128061258	128061408	LARP1B	395	+	169.997	277.318	214.127	198.198	115.467	137.811	LARP1B	189.808	1.63131	1.25959	1.16589	0.67923	0.810667	1.11654
chr9	127122574	127122724	ANGPTL2	247	-	287.081	439.338	361.548	251.926	167.952	106.008	ANGPTL2	265.363	1.53036	1.25939	0.877543	0.585033	0.369262	0.924349
chr17	75205635	75205785	NUP85	119	+	90.0645	119.066	113.401	136.112	97.0975	53.0042	NUP85	138.21	1.32201	1.25911	1.51127	1.07809	0.588514	1.53457
chr1	32651145	32651295	RBBP4	222	+	117.084	152.224	147.421	152.827	123.34	110.249	RBBP4	221.136	1.30013	1.2591	1.30528	1.05343	0.941623	1.8887
chr6	53348866	53349016	ELOVL5	188	-	135.66	121.327	170.768	140.887	118.092	112.369	ELOVL5	165.852	0.894346	1.25879	1.03853	0.8705	0.828313	1.22256
chr2	84459177	84459327	SUCLG1	89	-	63.608	100.98	80.0476	93.1289	57.7337	48.7639	SUCLG1	108.725	1.58754	1.25845	1.46411	0.907648	0.766632	1.7093
chr6	44247026	44247176	HSP90AB1	1145	+	709.258	1062.55	892.531	703.243	532.724	409.193	HSP90AB1	807.146	1.49811	1.2584	0.991519	0.7511	0.576931	1.13801
chr17	29622794	29622944	CORO6	85	-	73.7403	111.53	92.7218	143.275	81.352	84.8068	CORO6	90.2972	1.51247	1.25741	1.94297	1.10322	1.15007	1.22453
chr6	26383059	26383209	BTN2A2	56	+	46.158	83.6476	58.0345	75.2195	36.7396	29.6824	BTN2A2	60.8124	1.8122	1.2573	1.62961	0.795953	0.643061	1.31748
chr1	169106250	169106400	ATP1B1	458	+	166.619	293.897	209.458	159.991	154.831	116.609	ATP1B1	141.896	1.76389	1.25711	0.960221	0.929252	0.699854	0.85162
chr15	92655676	92655826	FAM174B	69	-	18.5758	33.9112	23.3472	48.9524	52.4852	23.3219	FAM174B	31.3276	1.82556	1.25686	2.63528	2.82546	1.2555	1.68647
chr16	86566774	86566924	FOXC2	92	+	18.5758	37.6791	23.3472	31.043	18.3698	29.6824	FOXC2	42.3844	2.0284	1.25686	1.67115	0.98891	1.59791	2.2817
chr1	52602406	52602556	GPX7	53	+	18.5758	42.9542	23.3472	22.6853	15.7455	14.8412	GPX7	25.7992	2.31237	1.25686	1.22123	0.847635	0.798953	1.38886
chr3	56683159	56683309	TASOR	311	-	195.327	204.221	245.479	247.15	202.068	165.373	TASOR	206.394	1.04553	1.25676	1.26531	1.03451	0.846647	1.05666
chr20	59032238	59032388	ATP5F1E	389	-	242.048	339.866	304.181	334.309	251.929	222.618	ATP5F1E	410.944	1.40413	1.2567	1.38117	1.04082	0.919727	1.69778
chr1	23368215	23368365	ZNF436	127	-	65.2967	92.6906	82.0488	76.4135	89.2248	80.5664	ZNF436	121.625	1.41953	1.25655	1.17025	1.36645	1.23385	1.86265
chr14	69767070	69767220	SRSF5	581	+	345.622	431.803	434.258	469.227	278.171	318.025	SRSF5	490.185	1.24935	1.25645	1.35763	0.804842	0.920153	1.41827
chr7	127652105	127652255	SND1	238	+	159.302	190.656	200.119	157.603	133.837	120.85	SND1	215.608	1.19682	1.25622	0.989335	0.840146	0.758622	1.35345
chr10	89251725	89251875	LIPA	91	-	206.585	385.834	259.488	155.215	73.4792	78.4463	LIPA	178.752	1.86768	1.25608	0.751337	0.355685	0.379729	0.865271
chr2	202265686	202265836	NOP58	322	+	94.0048	126.602	118.07	138.499	125.964	101.768	NOP58	184.28	1.34676	1.256	1.47332	1.33997	1.08258	1.96033
chr3	108222324	108222474	IFT57	115	-	113.143	159.006	142.085	145.663	73.4792	29.6824	IFT57	106.882	1.40535	1.2558	1.28742	0.649437	0.262344	0.944663
chr11	94128831	94128981	PANX1	103	+	75.429	123.587	94.723	108.65	57.7337	53.0042	PANX1	103.197	1.63845	1.25579	1.44043	0.765405	0.702703	1.36813
chr5	75052481	75052631	GCNT4	45	-	47.2838	69.3296	59.3686	76.4135	39.3639	31.8025	GCNT4	51.5984	1.46624	1.25558	1.61606	0.832503	0.672588	1.09125
chr5	140401787	140401937	ANKHD1	141	+	113.706	123.587	142.752	105.069	102.346	106.008	ANKHD1	134.524	1.0869	1.25545	0.924041	0.900093	0.932299	1.18309
chr5	140401787	140401937	ANKHD1-EIF4EBP3	141	+	113.706	123.587	142.752	105.069	102.346	106.008	ANKHD1-EIF4EBP3	134.524	1.0869	1.25545	0.924041	0.900093	0.932299	1.18309
chr19	53867811	53867961	MYADM	224	+	113.706	118.312	142.752	117.008	99.7218	114.489	MYADM	145.581	1.04051	1.25545	1.02904	0.877014	1.00689	1.28033
chr9	32552500	32552650	TOPORS	194	-	113.706	189.903	142.752	90.741	81.352	108.129	TOPORS	176.909	1.67012	1.25545	0.798032	0.715459	0.950952	1.55585
chr11	11621924	11622074	GALNT18	118	-	66.4225	113.791	83.3829	97.9048	36.7396	57.2446	GALNT18	97.6684	1.71314	1.25534	1.47397	0.55312	0.861825	1.47041
chr12	82358313	82358463	CCDC59	345	-	151.984	218.539	190.78	204.167	139.086	116.609	CCDC59	199.022	1.43791	1.25526	1.34335	0.915136	0.767245	1.30949
chr16	68310862	68311012	SLC7A6OS	345	-	172.248	247.175	216.129	251.926	149.583	93.2874	SLC7A6OS	267.206	1.43499	1.25475	1.46258	0.868416	0.541588	1.55129
chr6	166342461	166342611	SFT2D1	177	-	124.402	158.252	156.093	158.797	91.849	72.0858	SFT2D1	141.896	1.2721	1.25475	1.27648	0.738324	0.579459	1.14062
chr5	1801338	1801488	NDUFS6	126	+	76.5548	103.994	96.0571	114.62	68.2307	61.4849	NDUFS6	114.254	1.35843	1.25475	1.49723	0.891266	0.803149	1.49245
chr2	3377749	3377899	EIPR1	61	-	19.1387	25.6218	24.0143	35.8188	39.3639	31.8025	EIPR1	47.9128	1.33874	1.25475	1.87154	2.05677	1.66169	2.50345
chr1	212035708	212035858	DTL	59	+	9.56935	24.8682	12.0071	29.849	41.9881	16.9614	DTL	79.2404	2.59873	1.25475	3.11923	4.38777	1.77247	8.28065
chr14	75069570	75069720	ZC2HC1C	49	+	9.56935	12.0573	12.0071	22.6853	20.9941	14.8412	ZC2HC1C	35.0132	1.25999	1.25475	2.37062	2.19389	1.55091	3.65889
chr12	56042069	56042219	RPS26	514	+	232.479	387.341	291.507	244.762	118.092	122.97	RPS26	302.219	1.66613	1.25391	1.05283	0.507968	0.528951	1.29998
chr6	31815470	31815620	HSPA1A	1042	+	941.737	1305.2	1180.7	903.828	551.094	657.252	HSPA1A	915.872	1.38595	1.25375	0.959746	0.585189	0.697915	0.972535
chr19	19900878	19901028	ZNF93	81	+	38.8403	56.5187	48.6956	89.5471	76.1035	46.6437	ZNF93	119.782	1.45516	1.25374	2.30552	1.9594	1.20091	3.08396
chr1	88891475	88891625	GTF2B	111	-	136.223	227.582	170.768	142.081	70.855	95.4076	GTF2B	130.839	1.67066	1.25359	1.043	0.52014	0.700378	0.960477
chr1	153990697	153990847	RPS27	372	+	360.821	431.803	452.269	528.925	362.148	294.704	RPS27	466.228	1.19672	1.25344	1.46589	1.00368	0.81676	1.29213
chr17	47941532	47941682	PNPO	228	+	78.2435	129.616	98.0583	121.784	78.7277	78.4463	PNPO	130.839	1.65657	1.25325	1.55647	1.00619	1.00259	1.6722
chr4	39638816	39638966	SMIM14	319	-	361.947	380.559	453.603	322.369	188.947	182.335	SMIM14	304.062	1.05142	1.25323	0.890652	0.522029	0.503762	0.840073
chr1	166876213	166876363	TADA1	93	-	68.6742	76.8654	86.0512	89.5471	52.4852	27.5622	TADA1	123.468	1.11928	1.25304	1.30394	0.764264	0.401347	1.79788
chr9	96418297	96418447	ZNF367	110	-	19.7016	33.9112	24.6813	46.5645	44.6124	46.6437	ZNF367	123.468	1.72124	1.25276	2.36349	2.2644	2.36751	6.2669
chr3	129249547	129249697	COPG1	284	+	218.406	281.84	273.496	284.163	167.952	148.412	COPG1	316.962	1.29044	1.25224	1.30108	0.76899	0.679523	1.45125
chr3	185937919	185938069	TRA2B	1170	-	716.575	1015.83	897.2	710.407	545.846	415.553	TRA2B	873.487	1.41762	1.25207	0.991392	0.761743	0.579916	1.21897
chr11	119095383	119095533	H2AFX	416	-	468.335	647.327	586.349	542.058	338.529	381.63	H2AFX	622.866	1.38219	1.25199	1.15742	0.722835	0.814865	1.32996
chr20	3846801	3846951	MAVS	572	+	361.384	444.614	452.269	355.8	223.062	205.656	MAVS	471.757	1.23031	1.25149	0.984548	0.617244	0.569079	1.30542
chr7	6374475	6374625	RAC1	181	+	80.4951	110.777	100.727	101.487	76.1035	76.3261	RAC1	125.31	1.3762	1.25134	1.26078	0.945443	0.948208	1.55674
chr4	165207568	165207718	KLHL2	202	+	172.248	183.874	215.461	243.568	181.074	139.931	KLHL2	252.464	1.0675	1.25088	1.41405	1.05124	0.812381	1.4657
chr20	2840581	2840731	PCED1A	49	-	40.529	49.7364	50.6968	70.4437	57.7337	74.2059	PCED1A	58.9696	1.22718	1.25088	1.73811	1.4245	1.83093	1.455
chr16	53503133	53503283	AKTIP	232	-	111.455	158.252	139.416	94.3229	81.352	91.1673	AKTIP	108.725	1.41987	1.25087	0.846287	0.729909	0.817974	0.975506
chr19	55283987	55284137	BRSK1	20	+	10.1323	12.8109	12.6742	25.0732	18.3698	10.6008	BRSK1	16.5852	1.26436	1.25087	2.47458	1.81299	1.04624	1.63686
chr1	43172657	43172807	CFAP57	60	+	10.1323	15.8252	12.6742	9.55169	18.3698	14.8412	CFAP57	12.8996	1.56186	1.25087	0.942697	1.81299	1.46474	1.27312
chr17	75779703	75779853	H3F3B	867	-	579.227	915.602	724.431	516.985	349.026	226.858	H3F3B	560.211	1.58073	1.25069	0.892543	0.602572	0.391656	0.96717
chrX	77899400	77899550	COX7B	155	+	81.6209	125.095	102.061	114.62	62.9822	55.1244	COX7B	121.625	1.53263	1.25043	1.4043	0.771643	0.675371	1.49012
chr19	39540077	39540227	EID2	265	-	215.592	278.072	269.494	253.12	223.062	146.292	EID2	267.206	1.28981	1.25002	1.17407	1.03465	0.67856	1.23941
chr11	60906489	60906639	PRPF19	149	-	82.1838	100.226	102.728	124.172	102.346	86.9269	PRPF19	134.524	1.21953	1.24998	1.51091	1.24533	1.05771	1.63687
chr11	9461037	9461187	ZNF143	1569	+	713.761	1253.21	891.864	638.769	648.192	549.124	ZNF143	1157.28	1.75578	1.24953	0.894934	0.908136	0.769339	1.62138
chr12	113335032	113335182	SLC8B1	228	-	279.763	422.006	349.541	322.369	191.571	188.695	SLC8B1	267.206	1.50844	1.24942	1.15229	0.684762	0.674482	0.955116
chr14	33951001	33951151	EGLN3	482	-	580.353	1030.9	725.098	490.718	304.414	218.377	EGLN3	414.63	1.77633	1.24941	0.845551	0.524532	0.376283	0.714444
chr7	76627190	76627340	POMZP3	557	-	249.929	386.588	312.186	255.508	217.813	167.493	POMZP3	420.158	1.54679	1.2491	1.02232	0.8715	0.670162	1.68111
chr19	23758799	23758949	ZNF681	78	-	62.4822	73.0975	78.0464	145.663	76.1035	55.1244	ZNF681	121.625	1.16989	1.2491	2.33127	1.218	0.882242	1.94655
chr17	30291887	30292037	BLMH	120	-	73.1774	80.6333	91.3877	84.7712	47.2366	46.6437	BLMH	97.6684	1.10189	1.24885	1.15843	0.645508	0.637406	1.33468
chr1	241519648	241519798	FH	239	-	168.308	198.192	210.125	202.973	91.849	108.129	FH	224.822	1.17756	1.24846	1.20596	0.54572	0.642447	1.33578
chr22	38843953	38844103	NPTXR	883	-	929.353	1425.78	1160.02	961.139	611.452	419.794	NPTXR	930.614	1.53416	1.2482	1.0342	0.657933	0.451706	1.00136
chr18	12377119	12377269	AFG3L2	382	-	327.61	430.295	408.91	446.541	278.171	214.137	AFG3L2	442.272	1.31344	1.24816	1.36303	0.849092	0.653634	1.35
chr9	128160256	128160406	C9orf16	166	+	148.606	173.324	185.444	231.628	152.207	67.8454	C9orf16	206.394	1.16633	1.24789	1.55867	1.02423	0.456545	1.38887
chr1	147928363	147928513	GPR89B	329	+	181.818	272.797	226.802	241.18	160.08	129.33	GPR89B	287.477	1.50039	1.24741	1.32649	0.880441	0.711316	1.58113
chr6	84763641	84763791	TBX18	58	-	21.3903	31.6505	26.6825	26.2671	31.4911	44.5236	TBX18	40.5416	1.47967	1.24741	1.22799	1.47221	2.08149	1.89533
chrX	106726627	106726777	RNF128	20	+	10.6952	17.3324	13.3413	8.35773	5.24852	8.48068	RNF128	3.6856	1.62058	1.24741	0.781447	0.490736	0.792943	0.344603
chr6	75749167	75749317	MYO6	315	+	323.106	473.25	402.906	330.727	175.825	135.691	MYO6	302.219	1.46469	1.24698	1.02359	0.544171	0.419958	0.935356
chr7	99374654	99374804	ARPC1B	863	+	629.325	827.433	784.467	648.321	349.026	284.103	ARPC1B	613.652	1.31479	1.24652	1.03018	0.554604	0.451441	0.975096
chrX	55000291	55000441	APEX2	211	+	97.9451	165.035	122.073	130.142	97.0975	82.6866	APEX2	186.123	1.68497	1.24634	1.32872	0.991346	0.844214	1.90028
chr20	23049615	23049765	THBD	123	-	32.6484	54.2579	40.6909	70.4437	52.4852	53.0042	THBD	77.3976	1.66189	1.24634	2.15765	1.60759	1.62349	2.37064
chr10	68956103	68956253	DDX21	362	+	163.242	193.671	203.454	263.865	228.31	207.777	DDX21	285.634	1.1864	1.24633	1.6164	1.3986	1.27282	1.74976
chr1	109548559	109548709	GNAI3	425	+	207.148	282.593	258.154	214.913	167.952	97.5278	GNAI3	294.848	1.36421	1.24623	1.03749	0.810783	0.470812	1.42337
chr10	110918662	110918812	SHOC2	137	+	109.203	178.599	136.081	134.918	86.6005	86.9269	SHOC2	136.367	1.63548	1.24613	1.23548	0.793023	0.796012	1.24875
chr4	106316133	106316283	TBCK	180	-	109.203	149.963	136.081	111.038	70.855	59.3647	TBCK	141.896	1.37325	1.24613	1.0168	0.648837	0.543618	1.29938
chr14	20413364	20413514	TEP1	239	-	153.11	254.711	190.78	207.749	118.092	101.768	TEP1	202.708	1.66358	1.24603	1.35686	0.771289	0.664672	1.32394
chr13	24160675	24160825	SPATA13	152	+	121.024	201.96	150.756	100.293	94.4733	86.9269	SPATA13	117.939	1.66876	1.24567	0.828703	0.780616	0.718262	0.974509
chr19	48619505	48619655	SPHK2	94	+	77.1177	67.8224	96.0571	121.784	73.4792	76.3261	SPHK2	112.411	0.879466	1.24559	1.5792	0.952819	0.989735	1.45765
chr5	112861230	112861380	SRP19	332	+	165.493	195.931	206.123	247.15	160.08	120.85	SRP19	263.52	1.18392	1.24551	1.49342	0.967292	0.730242	1.59233
chr2	9555661	9555811	ADAM17	135	-	66.4225	93.4442	82.7159	87.1591	73.4792	78.4463	ADAM17	99.5112	1.40682	1.2453	1.31219	1.10624	1.18102	1.49815
chr4	158672225	158672375	ETFDH	47	+	33.2113	42.2006	41.3579	45.3705	20.9941	21.2017	ETFDH	51.5984	1.27067	1.2453	1.36612	0.632137	0.638388	1.55364
chr7	103297368	103297518	PMPCB	153	+	88.9387	134.138	110.733	113.426	62.9822	57.2446	PMPCB	117.939	1.50821	1.24505	1.27533	0.708153	0.643641	1.32607
chr10	70132730	70132880	AIFM2	100	-	44.4693	65.5617	55.3663	63.2799	68.2307	36.0429	AIFM2	53.4412	1.47431	1.24505	1.423	1.53433	0.810512	1.20175
chr7	112206301	112206451	DOCK4	142	-	144.666	253.957	180.107	78.8014	57.7337	23.3219	DOCK4	99.5112	1.75547	1.24498	0.544713	0.399083	0.161212	0.687869
chr7	99616895	99617045	ZSCAN25	257	+	144.666	203.467	180.107	204.167	123.34	125.09	ZSCAN25	200.865	1.40646	1.24498	1.4113	0.852585	0.864681	1.38847
chr17	76710889	76711039	MXRA7	280	-	445.256	406.181	554.33	651.903	417.257	318.025	MXRA7	628.395	0.912241	1.24497	1.46411	0.937117	0.714252	1.41131
chr12	119667855	119668005	PRKAB1	109	+	55.7274	66.3152	69.3746	87.1591	52.4852	61.4849	PRKAB1	79.2404	1.18999	1.24489	1.56403	0.94182	1.10332	1.42193
chr3	128123724	128123874	RUVBL1	129	-	55.7274	75.3582	69.3746	99.0988	60.3579	33.9227	RUVBL1	73.712	1.35226	1.24489	1.77828	1.08309	0.608726	1.32272
chr9	99221859	99222009	ALG2	486	-	324.232	440.846	403.573	331.921	199.444	184.455	ALG2	296.691	1.35966	1.2447	1.02371	0.615127	0.568898	0.915058
chr13	21140476	21140626	SAP18	458	+	270.193	405.427	336.2	293.714	160.08	182.335	SAP18	315.119	1.50051	1.2443	1.08705	0.592465	0.674832	1.16627
chr8	22669028	22669178	BIN3	180	-	90.0645	99.4729	112.067	122.978	70.855	63.6051	BIN3	79.2404	1.10446	1.2443	1.36544	0.786714	0.706217	0.879818
chr16	85688879	85689029	GINS2	46	-	22.5161	24.8682	28.0167	47.7584	36.7396	36.0429	GINS2	53.4412	1.10446	1.2443	2.12108	1.6317	1.60076	2.37347
chr1	204411743	204411893	PPP1R15B	451	-	202.645	293.144	252.15	216.107	202.068	148.412	PPP1R15B	291.162	1.44659	1.24429	1.06643	0.997153	0.732374	1.43681
chr17	56960953	56961103	COIL	110	-	68.1113	96.4585	84.7171	89.5471	76.1035	44.5236	COIL	106.882	1.41619	1.2438	1.31472	1.11734	0.653689	1.56923
chr6	27814665	27814815	HIST1H2AJ	307	-	69.2371	140.92	86.0512	101.487	152.207	78.4463	HIST1H2AJ	173.223	2.03532	1.24285	1.46579	2.19834	1.13301	2.50188
chr14	103562581	103562731	BAG5	204	-	130.031	152.224	161.429	180.288	118.092	93.2874	BAG5	193.494	1.17067	1.24147	1.3865	0.908183	0.717424	1.48806
chr17	77958627	77958777	TNRC6C	283	+	106.389	138.659	132.079	78.8014	81.352	57.2446	TNRC6C	136.367	1.30332	1.24147	0.740691	0.764666	0.538069	1.28178
chr1	27725947	27726097	FAM76A	300	+	202.082	377.545	250.816	188.646	115.467	103.888	FAM76A	191.651	1.86828	1.24116	0.933512	0.571387	0.514088	0.948382
chrX	153687853	153688003	SLC6A8	365	+	274.697	416.731	340.869	192.228	107.595	106.008	SLC6A8	276.42	1.51706	1.24089	0.699782	0.391686	0.385909	1.00627
chr13	52012341	52012491	ALG11	109	+	72.6145	110.023	90.0536	91.935	49.8609	50.8841	ALG11	106.882	1.51517	1.24016	1.26607	0.686652	0.700743	1.47191
chr12	122835428	122835578	HIP1R	38	+	24.2048	31.6505	30.0179	42.9826	39.3639	27.5622	HIP1R	53.4412	1.30761	1.24016	1.77579	1.62628	1.13871	2.20788
chr2	206086052	206086202	INO80D	40	-	24.2048	60.2866	30.0179	9.55169	31.4911	16.9614	INO80D	25.7992	2.49069	1.24016	0.39462	1.30103	0.700745	1.06587
chr16	56451474	56451624	OGFOD1	190	+	73.1774	97.2121	90.7206	103.875	91.849	84.8068	OGFOD1	117.939	1.32844	1.23974	1.4195	1.25516	1.15892	1.61169
chr13	75636257	75636407	LMO7	239	+	195.89	246.421	242.811	202.973	136.461	61.4849	LMO7	158.481	1.25796	1.23953	1.03616	0.696621	0.313875	0.809031
chr16	77190888	77191038	MON1B	92	+	48.9726	57.2723	60.7028	60.892	52.4852	46.6437	MON1B	75.5548	1.16948	1.23953	1.24339	1.07173	0.952445	1.5428
chrX	149505226	149505376	IDS	271	-	392.343	550.115	486.289	452.511	293.917	209.897	IDS	438.586	1.40213	1.23945	1.15336	0.749133	0.534983	1.11786
chr1	93180321	93180471	TMED5	214	-	196.453	263	243.478	157.603	86.6005	93.2874	TMED5	175.066	1.33874	1.23937	0.802243	0.44082	0.474859	0.891134
chr2	233566692	233566842	USP40	252	-	173.374	253.204	214.794	251.926	233.559	129.33	USP40	256.149	1.46045	1.23891	1.45308	1.34714	0.74596	1.47744
chr19	4402570	4402720	CHAF1A	47	+	24.7677	39.1863	30.6849	56.1162	39.3639	33.9227	CHAF1A	68.1836	1.58215	1.23891	2.2657	1.58932	1.36963	2.75292
chr20	45406564	45406714	DBNDD2	25	+	12.3839	8.28941	15.3425	23.8792	13.1213	12.721	DBNDD2	25.7992	0.66937	1.23891	1.92825	1.05955	1.02722	2.08329
chr13	52642361	52642511	HNRNPA1L2	37	+	12.3839	26.3754	15.3425	21.4913	7.87277	12.721	HNRNPA1L2	25.7992	2.12981	1.23891	1.73542	0.635726	1.02722	2.08329
chr19	19192865	19193015	RFXANK	121	+	124.402	173.324	154.092	177.9	73.4792	57.2446	RFXANK	162.166	1.39326	1.23866	1.43004	0.590659	0.460158	1.30356
chr17	79839366	79839516	CBX4	1037	-	373.768	599.098	462.942	340.279	288.668	258.661	CBX4	504.927	1.60286	1.23858	0.910402	0.772319	0.692036	1.35091
chr5	160419002	160419152	SLU7	196	-	87.25	127.355	108.064	81.1893	68.2307	55.1244	SLU7	103.197	1.45966	1.23856	0.930536	0.782014	0.631798	1.18277
chr19	49929130	49929280	ATF5	225	+	62.4822	131.877	77.3794	83.5773	73.4792	72.0858	ATF5	162.166	2.11063	1.23842	1.33762	1.176	1.1537	2.5954
chr2	196799598	196799748	GTF3C3	168	-	100.197	136.398	124.074	143.275	107.595	67.8454	GTF3C3	143.738	1.3613	1.2383	1.42993	1.07383	0.67712	1.43455
chr2	9423580	9423730	CPSF3	106	+	50.0984	65.5617	62.0369	84.7712	44.6124	69.9656	CPSF3	88.4544	1.30866	1.2383	1.69209	0.890496	1.39656	1.76561
chr6	159789886	159790036	MRPL18	204	+	87.8129	82.1405	108.731	103.875	76.1035	72.0858	MRPL18	103.197	0.935404	1.23821	1.18291	0.866655	0.820902	1.17519
chr1	3857218	3857368	DFFB	48	+	75.9919	76.1118	94.0559	69.2497	28.8668	16.9614	DFFB	47.9128	1.00158	1.23771	0.911277	0.379867	0.2232	0.630499
chr12	118136047	118136197	PEBP1	406	+	228.539	272.797	282.835	235.21	173.201	131.45	PEBP1	281.948	1.19366	1.23758	1.02919	0.757862	0.575175	1.2337
chr5	32585497	32585647	SUB1	255	+	228.539	285.608	282.835	280.581	173.201	133.571	SUB1	333.547	1.24971	1.23758	1.22772	0.757862	0.584456	1.45948
chr22	37849233	37849383	ANKRD54	337	-	216.155	281.086	267.492	268.641	220.438	154.772	ANKRD54	300.376	1.30039	1.2375	1.24282	1.01981	0.716023	1.38963
chr11	3797466	3797616	NUP98	157	-	166.056	195.178	205.456	232.822	196.819	131.45	NUP98	261.678	1.17537	1.23727	1.40207	1.18526	0.7916	1.57584
chr3	14651684	14651834	CCDC174	128	+	115.958	111.53	143.419	154.021	99.7218	67.8454	CCDC174	165.852	0.961814	1.23682	1.32825	0.859982	0.585086	1.43028
chr12	65169523	65169673	LEMD3	216	+	141.852	199.699	175.438	134.918	102.346	93.2874	LEMD3	210.079	1.4078	1.23677	0.951118	0.721498	0.657639	1.48097
chrX	107118739	107118889	RBM41	27	-	25.8935	33.1576	32.019	35.8188	28.8668	25.442	RBM41	46.07	1.28054	1.23657	1.38331	1.11483	0.982563	1.77921
chr18	79679758	79679908	CTDP1	148	+	77.6806	88.1691	96.0571	87.1591	70.855	46.6437	CTDP1	108.725	1.13502	1.23656	1.12202	0.912133	0.600455	1.39964
chrX	47561489	47561639	ARAF	39	+	12.9468	14.3181	16.0095	21.4913	41.9881	33.9227	ARAF	64.498	1.10592	1.23656	1.65997	3.24313	2.62016	4.98177
chr14	24299659	24299809	DHRS1	43	-	12.9468	15.8252	16.0095	25.0732	15.7455	8.48068	DHRS1	23.9564	1.22233	1.23656	1.93663	1.21617	0.655041	1.85037
chr6	150142984	150143134	PPP1R14C	47	+	12.9468	13.5645	16.0095	17.9094	28.8668	31.8025	PPP1R14C	31.3276	1.04771	1.23656	1.38331	2.22965	2.4564	2.41972
chr2	232697269	232697419	GIGYF2	237	+	168.871	201.206	208.791	207.749	139.086	89.0471	GIGYF2	228.507	1.19148	1.23639	1.23022	0.823623	0.527308	1.35315
chr8	41309388	41309538	SFRP1	87	-	91.1903	92.6906	112.734	122.978	73.4792	89.0471	SFRP1	108.725	1.01645	1.23625	1.34859	0.805779	0.976498	1.19229
chr14	69611539	69611689	SUSD6	266	+	208.837	296.911	258.154	170.736	118.092	120.85	SUSD6	130.839	1.42174	1.23615	0.817556	0.565475	0.578681	0.626513
chr20	20052357	20052507	CRNKL1	137	-	65.2967	81.3869	80.7147	66.8618	60.3579	46.6437	CRNKL1	103.197	1.24642	1.23612	1.02397	0.924364	0.714335	1.58043
chr22	41621238	41621388	XRCC6	215	+	117.647	155.238	145.42	186.258	115.467	80.5664	XRCC6	184.28	1.31952	1.23607	1.58319	0.98147	0.684815	1.56638
chr4	112297311	112297461	ALPK1	75	+	78.8064	187.642	97.3913	63.2799	39.3639	19.0815	ALPK1	68.1836	2.38105	1.23583	0.802979	0.499501	0.242131	0.865204
chr8	28093095	28093245	ELP3	145	+	78.8064	106.255	97.3913	101.487	73.4792	80.5664	ELP3	106.882	1.3483	1.23583	1.2878	0.932401	1.02233	1.35626
chr4	124437	124587	ZNF718	176	+	92.3161	123.587	114.068	134.918	62.9822	63.6051	ZNF718	156.638	1.33874	1.23562	1.46148	0.682245	0.688992	1.69676
[truncated: 9,594 more rows]

## Sheet: DMSO Genebody
Chromosome	DMSO_Gene_body_left	DMSO_Gene_body_right	Genename	Strength	Strand	Uninf_Gene_body	4hpi_Gene_body	12hpi_Gene_body	24hpi_Gene_body	48hpi_Gene_body	72hpi_Gene_body	Genename2	72hpi_PFA_Genebody	4hpi_Gene_body/Uninf_Gene_body	12hpi_Gene_body/Uninf_Gene_body	24hpi_Gene_body/Uninf_Gene_body	48hpi_Gene_body/Uninf_Gene_body	72hpi_Gene_body/Uninf_Gene_body	72hpi_PFA_Gene_body/Uninf_Gene_body
chr2	218959739	218962162	CDK5R2	39	+	0	0	0.667063	1.19396	0	0	CDK5R2	7.3712	0	0.667063	1.19396	0	0	7.3712
chr1	155127962	155134899	EFNA1	43	+	7.88064	7.53582	4.66944	4.77584	0	10.6008	EFNA1	7.3712	0.956245	0.59252	0.606022	0	1.34517	0.935356
chr9	34521043	34522907	ENHO	42	-	0	0	0.667063	1.19396	0	2.12017	ENHO	1.8428	0	0.667063	1.19396	0	2.12017	1.8428
chr4	154744076	154753120	LRAT	21	+	0.562903	0	0	0	0	10.6008	LRAT	1.8428	0	0	0	0	18.8324	3.27374
chr2	231921809	231926319	NPPC	173	-	0.562903	2.26075	4.66944	2.38792	0	12.721	NPPC	0	4.01623	8.29528	4.24215	0	22.5989	0
chrX	51332933	51337525	NUDT10	19	+	2.81451	10.5502	10.006	3.58188	0	8.48068	NUDT10	9.214	3.7485	3.55515	1.27265	0	3.0132	3.27375
chr19	49487685	49492308	RPL13A	606	+	8142.39	9585.57	17397	39991.7	119784	112823	RPL13A	58376.2	1.17724	2.1366	4.91154	14.7112	13.8563	7.16942
chr17	7572905	7579006	EIF4A1	1784	+	7406.68	9556.93	13808.9	32586.8	77405.1	86282.4	EIF4A1	47627.2	1.29031	1.86438	4.39965	10.4507	11.6493	6.4303
chr20	2652708	2658393	NOP56	451	+	3578.37	4495.12	7892.03	18088.5	53666.1	52075.6	NOP56	27979.2	1.25619	2.20548	5.05496	14.9974	14.5529	7.81898
chr1	28506119	28539300	RCC1	691	+	5807.47	7073.88	8534.41	19708.7	51837	46840.9	RCC1	34849.2	1.21807	1.46956	3.39368	8.92592	8.06563	6.00075
chr17	4584604	4608319	SMTNL2	37	+	36.5887	41.447	8.00476	9.55169	5.24852	6.36051	SMTNL2	7.3712	1.13278	0.218777	0.261056	0.143446	0.173838	0.201461
chr1	44775663	44778779	RPS8	308	+	3041.36	3707.62	7214.96	15410.5	43539.1	40399.8	RPS8	23189.8	1.21907	2.37228	5.06698	14.3157	13.2835	7.62481
chr16	89560764	89566828	RPL13	405	+	2882.06	3367.01	5585.32	13479.8	38096.3	37145.4	RPL13	18144.2	1.16827	1.93796	4.67714	13.2184	12.8885	6.29557
chr17	28720075	28724359	RPL23A	103	+	1816.49	2052	4035.73	9471.69	29278.8	24632.1	RPL23A	13371.4	1.12965	2.22172	5.21428	16.1183	13.5603	7.36112
chr11	8682872	8714759	RPL27A	204	+	2159.86	2928.42	4568.72	10473.4	26599.5	24437.1	RPL27A	14176.7	1.35584	2.11529	4.84911	12.3154	11.3142	6.56371
chr6	31544462	31547394	ATP6V1G2	53	-	27.5822	15.8252	8.00476	9.55169	5.24852	16.9614	ATP6V1G2	16.5852	0.573747	0.290215	0.346299	0.190286	0.61494	0.601301
chr9	133348310	133351426	RPL7A	287	+	1610.47	1871.9	3824.94	8060.43	24980.3	21651.2	RPL7A	12368.9	1.16233	2.37505	5.00502	15.5112	13.444	7.6803
chr3	186783655	186789897	EIF4A2	1460	+	2124.96	2664.67	4173.15	9206.63	24489.6	25007.4	EIF4A2	14272.5	1.25399	1.96387	4.33261	11.5247	11.7684	6.7166
chr1	75786332	75795086	RABGGTB	210	+	1643.68	2480.04	5085.02	8277.73	23185.3	21314.1	RABGGTB	14313	1.50883	3.09368	5.0361	14.1057	12.9673	8.7079
chr3	184314679	184335358	EIF4G1	255	+	1269.91	1391.11	2746.97	5717.88	16078.8	14050.4	EIF4G1	7865.07	1.09544	2.16312	4.50259	12.6614	11.0641	6.19341
chr3	172039708	172401669	FNDC3B	191	+	8641.69	8714.43	3225.25	7962.53	12454.7	10327.3	FNDC3B	9792.64	1.00842	0.37322	0.921409	1.44123	1.19506	1.13319
chr12	53938815	53946544	HOXC13	22	+	10.6952	7.53582	7.3377	20.2973	2.62426	29.6824	HOXC13	9.214	0.704598	0.686074	1.8978	0.245368	2.7753	0.861508
chr14	101561572	101563452	DIO3	71	+	30.3968	11.3037	4.66944	3.58188	7.87277	2.12017	DIO3	9.214	0.371871	0.153616	0.117837	0.259	0.0697498	0.303124
chr2	202265837	202303661	NOP58	322	+	780.183	1023.36	1784.39	3986.64	12260.5	11198.7	NOP58	6442.43	1.31169	2.28714	5.10988	15.7149	14.3539	8.25759
chrX	93670930	93673506	NAP1L3	28	-	9.56935	11.3037	1.33413	9.55169	2.62426	10.6008	NAP1L3	11.0568	1.18124	0.139417	0.998155	0.274236	1.10779	1.15544
chr3	188154021	188890671	LPP	69	+	4561.77	6254.73	4337.25	7126.75	11475.9	8938.63	LPP	6820.2	1.37112	0.950782	1.56228	2.51567	1.95947	1.49508
chr12	6493456	6531955	NCAPD2	238	+	983.954	1421.26	1348.14	3446.97	10880.2	10159.9	NCAPD2	5756.91	1.44444	1.37013	3.50318	11.0576	10.3256	5.85079
chr6	37819855	38154624	ZFAND3	108	+	2706.44	3177.1	2519.5	5445.66	10756.8	8158.41	ZFAND3	6565.9	1.1739	0.930928	2.01211	3.97452	3.01444	2.42603
chr9	131394167	131500197	PRRC2B	186	+	1218.68	1403.92	1973.84	3997.38	10095.5	8414.95	PRRC2B	6031.48	1.152	1.61965	3.28009	8.28396	6.90497	4.94919
chr6	31834996	31839766	SNHG32	101	+	696.874	988.7	2278.69	3554.42	10032.5	7791.62	SNHG32	5404.93	1.41876	3.26987	5.10052	14.3964	11.1808	7.75596
chr12	50401003	50480004	LARP4	110	+	1119.05	1491.34	1257.41	3580.69	9966.93	8446.75	LARP4	4500.12	1.33268	1.12364	3.19976	8.9066	7.54814	4.02138
chr1	92832137	92841924	RPL5	299	+	719.953	921.631	1440.86	3337.12	9906.57	8487.04	RPL5	5331.22	1.28013	2.00133	4.63519	13.76	11.7883	7.40496
chr5	14143437	14532128	TRIO	122	+	8360.23	9015.1	3685.53	7357.19	9864.58	7757.7	TRIO	6435.06	1.07833	0.440841	0.880022	1.17994	0.927929	0.769723
chr8	99013398	99877580	VPS13B	41	+	4782.42	5324.81	2699.61	5705.94	9756.99	7045.32	VPS13B	6578.8	1.11341	0.564486	1.19311	2.04018	1.47317	1.37562
chr7	133253167	134066589	EXOC4	134	+	1882.91	2691.8	1941.15	4495.26	9334.48	6776.06	EXOC4	5826.93	1.4296	1.03093	2.3874	4.95748	3.59872	3.09464
chr2	233251760	233295674	ATG16L1	179	+	735.714	894.502	978.582	2756.86	9282	9161.25	ATG16L1	4653.07	1.21583	1.33011	3.74719	12.6163	12.4522	6.32456
chr9	76459289	76651203	GCNT1	63	+	1930.19	2426.53	2137.27	3886.34	9182.28	5101.13	GCNT1	3580.56	1.25715	1.10728	2.01345	4.75719	2.64281	1.85503
chr19	10106431	10114780	PPAN-P2RY11	109	+	762.733	838.737	1534.91	3526.96	9153.41	8792.34	PPAN-P2RY11	4461.42	1.09965	2.01238	4.62411	12.0008	11.5274	5.84926
chr2	28894763	28948219	WDR43	182	+	839.288	932.935	1430.18	3135.34	9135.04	7870.07	WDR43	4137.09	1.11158	1.70404	3.73571	10.8843	9.37708	4.92929
chr11	75399604	75422280	RPS3	272	+	885.446	1337.61	1829.75	3480.4	9114.05	7367.59	RPS3	5491.54	1.51066	2.06647	3.93067	10.2932	8.32077	6.202
chr6	12290444	12297194	EDN1	30	+	24.7677	62.5473	128.076	57.3101	7.87277	19.0815	EDN1	11.0568	2.52536	5.17109	2.3139	0.317864	0.770419	0.44642
chr19	10106431	10112012	PPAN	109	+	678.298	747.554	1458.2	3335.93	8875.24	8520.96	PPAN	4306.62	1.1021	2.14979	4.91809	13.0846	12.5623	6.34916
chr7	127652256	128092609	SND1	238	+	2336.61	2938.97	2474.14	5701.16	8859.49	8105.41	SND1	6525.35	1.25779	1.05886	2.43993	3.7916	3.46888	2.79266
chr19	17859999	17864153	RPL18A	89	+	510.553	692.542	1056.63	2563.43	8846.37	7172.53	RPL18A	4347.17	1.35645	2.06958	5.02089	17.327	14.0486	8.51463
chr2	86106316	86142157	PTCD3	282	+	747.535	1064.06	1236.74	3017.14	8481.6	6793.02	PTCD3	4339.79	1.42342	1.65442	4.03612	11.3461	9.08723	5.80547
chr2	101697744	101894689	MAP4K4	46	+	2530.25	3776.95	5841.47	8547.57	8219.18	5499.72	MAP4K4	6079.4	1.49272	2.30865	3.37815	3.24837	2.17359	2.40269
chr15	92900407	93027996	CHD2	104	+	3466.92	3604.38	2737.63	5233.13	8061.72	5308.9	CHD2	5720.05	1.03965	0.789643	1.50945	2.32533	1.5313	1.64989
chr2	204545592	205620162	PARD3B	55	+	3104.97	3973.64	1873.11	4943	7959.37	5739.3	PARD3B	4618.06	1.27977	0.603262	1.59196	2.56343	1.84842	1.48731
chrX	30304206	30309314	NR0B1	52	-	36.0258	23.3611	4.66944	7.16377	13.1213	12.721	NR0B1	7.3712	0.648455	0.129614	0.198851	0.36422	0.353108	0.204609
chr6	132814647	132817564	RPS12	469	+	528.003	629.995	1300.11	2501.35	7615.6	5266.5	RPS12	4446.68	1.19317	2.46232	4.73738	14.4234	9.97438	8.42169
chr11	66590176	66592977	CCDC87	37	-	14.0726	13.5645	4.66944	13.1336	5.24852	19.0815	CCDC87	20.2708	0.963894	0.331811	0.933275	0.37296	1.35593	1.44044
chr2	32357288	32618899	BIRC6	207	+	2150.29	2425.03	2130.6	4815.24	7458.14	5177.45	BIRC6	5069.54	1.12777	0.990843	2.23934	3.46843	2.40779	2.35761
chr7	98878603	99050831	TRRAP	68	+	1202.92	1485.31	1430.18	3747.84	7424.02	7011.4	TRRAP	4116.82	1.23475	1.18892	3.11562	6.17167	5.82865	3.42236
chr13	48976733	49209779	FNDC3A	63	+	1675.2	2457.43	6106.3	7947	7103.87	4496.88	FNDC3A	4955.29	1.46695	3.64512	4.74391	4.24061	2.68438	2.95803
chr3	61561661	62297609	PTPRG	152	+	2881.5	3007.55	2392.76	5267.76	7014.64	4070.72	PTPRG	5095.34	1.04374	0.830387	1.82813	2.43437	1.41271	1.76829
chr10	126905524	127452517	DOCK1	114	+	2311.84	3067.83	1944.49	4480.94	7009.39	4450.24	DOCK1	4395.08	1.32701	0.841101	1.93826	3.03195	1.92498	1.90112
chrX	154398454	154409168	RPL10	382	+	882.069	766.393	910.542	2686.41	7001.52	5366.15	RPL10	5146.94	0.868858	1.03228	3.04558	7.93761	6.08359	5.83508
chr21	29299001	29630751	BACH1	472	+	2253.3	3419.76	2710.28	4660.03	6830.94	4125.85	BACH1	3608.2	1.51767	1.2028	2.06809	3.03153	1.83103	1.6013
chr1	39105474	39487177	MACF1	118	+	2014.63	2897.52	2837.02	4772.26	6707.6	4630.45	MACF1	4474.32	1.43824	1.40821	2.3688	3.32945	2.29841	2.22091
chr15	39581156	39599466	THBS1	753	+	14741.3	13563	6808.72	9624.52	6681.36	2406.39	THBS1	3287.56	0.920068	0.461881	0.652895	0.453241	0.163241	0.223017
chr15	56918750	57299281	TCF12	216	+	2396.28	2670.7	1666.32	3805.15	6458.3	4859.43	TCF12	4153.67	1.11452	0.695378	1.58794	2.69514	2.02791	1.73338
chr16	78099767	79212667	WWOX	85	+	668.729	1165.79	848.505	1925.86	6303.47	3343.51	WWOX	2653.63	1.74329	1.26883	2.87988	9.42605	4.9998	3.96817
chr11	19712923	20121601	NAV2	169	+	3589.07	4593.84	5221.77	6589.47	6282.47	4708.9	NAV2	5016.1	1.27995	1.45491	1.83598	1.75045	1.31201	1.3976
chr12	991352	1495933	ERC1	105	+	1444.41	1812.37	1423.51	3695.31	6269.35	4850.95	ERC1	4068.9	1.25475	0.98553	2.55835	4.34042	3.35843	2.817
chr5	15500253	15939795	FBXL7	223	+	3705.03	4294.67	2994.45	3892.31	6266.73	3371.07	FBXL7	3868.04	1.15915	0.808212	1.05055	1.69141	0.909863	1.044
chr3	152268999	152465780	MBNL1	210	+	2250.49	2794.28	2582.2	4638.54	6153.88	4070.72	MBNL1	4173.94	1.24163	1.14739	2.06112	2.73446	1.80881	1.85468
chr14	54566186	54793315	SAMD4A	384	+	956.935	1841.76	3013.13	3935.3	5972.81	4978.16	SAMD4A	2882.14	1.92464	3.14873	4.1124	6.2416	5.20219	3.01185
chr5	138753531	138935034	CTNNA1	238	+	1540.1	2000.76	2034.54	4051.11	5831.1	4566.84	CTNNA1	3886.47	1.29911	1.32104	2.63042	3.78618	2.96529	2.52352
chr9	94726786	95087218	AOPEP	109	+	3711.22	3963.09	2294.03	4211.1	5786.49	4543.52	AOPEP	4148.14	1.06787	0.618134	1.13469	1.55919	1.22427	1.11773
chr10	58513142	58831437	BICC1	228	+	6409.78	6187.66	2610.89	4281.54	5744.5	3574.61	BICC1	3998.88	0.965347	0.407329	0.66797	0.896209	0.557681	0.623872
chr9	35816391	35829014	FAM221B	47	-	12.3839	18.8396	6.67063	4.77584	5.24852	4.24034	FAM221B	5.5284	1.5213	0.538653	0.385649	0.423818	0.342407	0.446418
chr11	6235243	6244429	CNGA4	86	+	30.9597	50.49	30.0179	32.2369	13.1213	31.8025	CNGA4	47.9128	1.63083	0.96958	1.04125	0.423819	1.02722	1.54759
chrX	91434915	91438584	PABPC5	143	+	49.5355	61.7937	38.0226	45.3705	20.9941	27.5622	PABPC5	33.1704	1.24746	0.767583	0.915919	0.423819	0.556413	0.669629
chr10	74176842	74709303	ADK	155	+	1552.49	1910.33	898.534	2785.51	5739.25	4785.22	ADK	3352.05	1.23049	0.57877	1.79422	3.6968	3.08229	2.15914
chr2	235494192	236131800	AGAP1	78	+	1219.25	1648.84	1105.99	3180.71	5660.52	5281.34	AGAP1	4020.99	1.35234	0.907107	2.60874	4.64262	4.33163	3.29792
chr3	52686112	52694497	GNL3	334	+	431.747	449.889	961.238	1832.73	5655.28	4505.36	GNL3	2977.96	1.04202	2.22639	4.24492	13.0986	10.4352	6.89747
chr3	23203177	23591794	UBE2E2	86	+	1733.18	1756.6	921.882	2389.12	5636.91	3877.79	UBE2E2	2872.93	1.01351	0.531902	1.37846	3.25235	2.23738	1.65761
chr15	98648682	98964530	IGF1R	76	+	3408.38	3603.63	1518.9	3318.02	5615.91	5069.32	IGF1R	4538.82	1.05729	0.445637	0.973489	1.64768	1.48731	1.33166
chr6	20534563	21232404	CDKAL1	78	+	1537.85	2385.09	1845.1	3675.01	5560.8	4331.51	CDKAL1	3305.98	1.55092	1.19979	2.38971	3.61596	2.8166	2.14974
chr12	131950054	132081102	EP400	60	+	784.687	1062.55	1084.65	2328.22	5474.2	4689.81	EP400	3525.28	1.35411	1.38227	2.96707	6.97628	5.97666	4.49259
chr1	174159622	174995308	RABGAP1L	103	+	1047.56	1613.42	1494.22	3097.13	5392.85	3551.28	RABGAP1L	3049.83	1.54017	1.42638	2.95652	5.14801	3.39005	2.91137
chr18	2655803	2805017	SMCHD1	132	+	1335.77	2765.65	2571.53	3775.3	5342.99	4392.99	SMCHD1	4347.17	2.07045	1.92513	2.82631	3.99993	3.28873	3.25443
chr10	112447312	112818744	VTI1A	108	+	1043.06	1415.98	1530.24	2958.64	5335.12	4079.21	VTI1A	3033.25	1.35752	1.46707	2.8365	5.11487	3.91081	2.90803
chr15	85381043	85749358	AKAP13	21	+	2054.03	2475.52	1356.81	3559.2	5324.62	3792.98	AKAP13	4419.03	1.2052	0.66056	1.73279	2.59228	1.8466	2.1514
chr17	80544926	80966371	RPTOR	130	+	1406.13	2006.04	1400.17	3105.49	5232.77	4136.45	RPTOR	3505.01	1.42664	0.995761	2.20854	3.7214	2.94173	2.49266
chr2	148021153	148516971	MBD5	93	+	1773.71	2282.6	1964.5	2797.45	5224.9	2927.95	MBD5	2937.42	1.28691	1.10757	1.57717	2.94575	1.65075	1.65609
chr21	37366163	37526358	DYRK1A	57	+	2353.5	2426.53	1658.32	3232.05	5206.53	4831.87	DYRK1A	4172.1	1.03103	0.704619	1.3733	2.21225	2.05306	1.77272
chr6	150865753	151101887	MTHFD1L	54	+	3228.25	3451.41	1482.88	2475.08	5203.9	5154.13	MTHFD1L	2703.39	1.06913	0.459345	0.766694	1.61199	1.59657	0.837417
chr17	47831739	47837719	LRRC46	29	+	5.62903	4.52149	3.33532	13.1336	2.62426	12.721	LRRC46	9.214	0.803245	0.592521	2.33319	0.466201	2.25989	1.63687
chr10	79069066	79316528	ZMIZ1	149	+	3106.66	2989.46	1433.52	4120.36	5161.91	4986.64	ZMIZ1	5087.97	0.962275	0.461434	1.3263	1.66156	1.60515	1.63776
chr10	28533219	28623112	WAC	126	+	1552.49	1678.23	1978.51	3627.25	5151.42	3663.65	WAC	3619.26	1.08099	1.27441	2.33641	3.31817	2.35985	2.33126
chr16	69566085	69704666	NFAT5	436	+	1494.51	1744.54	1560.26	3323.99	5112.05	3661.53	NFAT5	3269.13	1.1673	1.04399	2.22413	3.42055	2.44999	2.18743
chr6	157823314	157945077	SNX9	326	+	3189.97	3466.48	2043.88	3923.36	5056.94	4170.37	SNX9	3748.26	1.08668	0.640721	1.2299	1.58526	1.30734	1.17501
chr11	93661765	93730358	CEP295	107	+	593.863	880.938	869.851	2186.14	5051.7	4367.55	CEP295	3153.03	1.4834	1.46473	3.68122	8.50651	7.35447	5.30936
chr1	10210646	10381603	KIF1B	421	+	1050.94	1424.27	1150.68	2779.54	5041.2	4168.25	KIF1B	3466.31	1.35523	1.09491	2.64481	4.79685	3.96621	3.29829
chr17	31095031	31382116	NF1	71	+	1274.41	1678.23	1530.24	3110.27	5025.45	3404.99	NF1	3376.01	1.31687	1.20074	2.44056	3.94335	2.67182	2.64908
chr9	109780360	110172512	PALM2-AKAP2	35	+	2042.77	2496.62	1560.93	4375.87	5014.96	4019.84	PALM2-AKAP2	3735.36	1.22217	0.764124	2.14213	2.45498	1.96784	1.82858
chr7	101816065	102283958	CUX1	48	+	1057.13	1432.56	968.576	2775.96	4917.86	3703.94	CUX1	2965.07	1.35514	0.916232	2.62594	4.65209	3.50377	2.80483
chr9	6757480	7175648	KDM4C	100	+	1255.27	1627.74	1260.75	2766.41	4899.49	4342.11	KDM4C	2758.67	1.29673	1.00437	2.20384	3.90314	3.4591	2.19767
chr12	75391196	75432688	GLIPR1L2	41	+	42.7806	57.2723	18.6778	26.2671	20.9941	16.9614	GLIPR1L2	51.5984	1.33874	0.436595	0.613996	0.490739	0.396474	1.20612
chr8	30384611	30572256	RBPMS	154	+	4161.54	3486.07	2416.77	3980.67	4873.25	3534.32	RBPMS	3315.2	0.837687	0.580739	0.956538	1.17102	0.849282	0.796628
chr7	131327967	131496632	MKLN1	211	+	1598.08	1782.22	1478.88	3227.28	4841.76	3629.73	MKLN1	3434.98	1.11523	0.92541	2.01947	3.02974	2.27131	2.14944
chr18	7567397	8406861	PTPRM	356	+	1996.62	2402.42	1448.86	3281	4836.51	4231.86	PTPRM	2871.08	1.20324	0.725656	1.64328	2.42235	2.11951	1.43797
chr18	74598242	75065671	ZNF407	73	+	1240.08	1613.42	1502.23	2731.78	4815.51	3867.19	ZNF407	3617.42	1.30106	1.2114	2.20291	3.88323	3.1185	2.91709
chr11	12674504	12944737	TEAD1	221	+	2354.06	2259.99	1555.59	2984.9	4812.89	3956.24	TEAD1	2719.97	0.960039	0.660812	1.26798	2.04451	1.6806	1.15544
chr1	151364304	151372627	SELENBP1	80	-	47.2838	43.7078	12.6742	31.043	23.6183	19.0815	SELENBP1	11.0568	0.924372	0.268045	0.656525	0.499501	0.403553	0.233839
chr15	71115542	71783383	THSD4	54	+	2206.58	2663.16	1771.05	3475.62	4773.52	3269.3	THSD4	2804.74	1.20692	0.802622	1.57512	2.16331	1.48161	1.27108
chr2	238848141	238910534	TWIST2	593	+	3728.11	2990.21	2950.42	4682.71	4749.91	3424.07	TWIST2	3530.8	0.802071	0.791398	1.25605	1.27408	0.918447	0.947075
chr16	53704252	54158512	FTO	52	+	1484.38	1871.14	991.923	2761.63	4734.16	3411.35	FTO	2850.81	1.26055	0.668241	1.86046	3.18932	2.29816	1.92054
chr19	49496518	49499708	RPS11	279	+	255.558	346.648	746.444	1375.44	4681.68	4208.54	RPS11	2598.35	1.35644	2.92084	5.38211	18.3194	16.468	10.1674
chr12	63844173	64162217	SRGAP1	104	+	2636.64	2585.54	1532.91	3054.15	4655.43	3551.28	SRGAP1	2832.38	0.980619	0.581388	1.15835	1.76567	1.3469	1.07424
chr12	752664	911452	WNK1	361	+	1415.7	1733.99	1568.27	2920.43	4626.57	4051.64	WNK1	3888.31	1.22483	1.10777	2.06289	3.26804	2.86193	2.74656
chr13	100089188	100530437	PCCA	180	+	1137.63	1474.76	1020.61	2361.65	4587.2	4045.28	PCCA	2915.31	1.29634	0.897137	2.07594	4.03224	3.55588	2.56262
chr14	66508236	67181803	GPHN	99	+	747.535	1161.27	963.24	2262.56	4560.96	2824.07	GPHN	2673.9	1.55347	1.28856	3.02669	6.10133	3.77784	3.57696
chr20	34363367	34540748	ITCH	320	+	2062.48	2338.37	1937.15	3270.26	4560.96	3754.82	ITCH	3700.34	1.13377	0.939233	1.5856	2.2114	1.82054	1.79412
chr16	53131120	53329150	CHD9	82	+	2317.47	2597.6	1535.58	2667.31	4545.21	3625.49	CHD9	3114.33	1.12088	0.662611	1.15096	1.96128	1.56442	1.34385
chr7	30594986	30634033	GARS	557	+	428.932	457.424	775.128	1103.22	4529.47	3636.09	GARS	3046.15	1.06643	1.80711	2.57202	10.5599	8.47708	7.10171
chr1	12230134	12512047	VPS13D	76	+	1598.08	1865.12	1572.27	2832.08	4526.84	3496.16	VPS13D	3165.93	1.1671	0.983849	1.77218	2.83267	2.18773	1.98108
chr3	107523074	107811339	BBX	137	+	1607.09	2016.59	1704.35	2953.86	4513.72	3277.78	BBX	3274.66	1.25481	1.06052	1.83802	2.80863	2.03957	2.03763
chr3	155080060	155183729	MME	75	+	3980.29	3713.65	2143.94	3177.13	4511.1	2751.98	MME	2935.58	0.93301	0.538639	0.798216	1.13336	0.691402	0.737529
chr7	3301306	4269000	SDK1	40	+	1677.45	1972.88	1116.66	2490.6	4500.6	3841.75	SDK1	2401.17	1.17612	0.665689	1.48475	2.683	2.29023	1.43144
chr7	90596101	91210590	CDK14	28	+	2041.09	2250.95	1184.7	3468.46	4466.49	3400.75	CDK14	2979.81	1.10282	0.580425	1.69932	2.18829	1.66614	1.45991
chr5	65925870	66082549	ERBIN	115	+	2273.57	2019.6	1436.19	2901.32	4463.86	3250.22	ERBIN	3245.17	0.888295	0.631689	1.27611	1.96337	1.42957	1.42735
chr6	159969179	160113507	IGF2R	383	+	1414.01	1910.33	1364.14	2316.28	4445.49	4178.85	IGF2R	3140.13	1.351	0.964732	1.63809	3.14389	2.95532	2.22073
chr15	72474415	72602987	ARIH1	195	+	1464.67	1630	1478.21	2875.06	4435	3663.65	ARIH1	3492.11	1.11288	1.00924	1.96294	3.02799	2.50135	2.38423
chr10	21526610	21743630	MLLT10	49	+	2133.97	2376.04	1365.48	3085.19	4414	3776.02	MLLT10	3632.16	1.11344	0.639878	1.44575	2.06845	1.76948	1.70207
chr9	2015429	2193624	SMARCA2	77	+	1964.53	2136.41	1310.11	2029.73	4398.26	3962.6	SMARCA2	2788.16	1.08749	0.666882	1.03319	2.23884	2.01707	1.41925
chr3	158110189	158545730	RSRC1	123	+	1493.94	1755.09	1240.07	2623.13	4374.64	2817.7	RSRC1	3112.49	1.17481	0.830067	1.75585	2.92826	1.88609	2.08341
chr13	34942394	35673022	NBEA	57	+	2439.06	2611.16	1214.72	2535.97	4366.76	2957.64	NBEA	3199.1	1.07056	0.498028	1.03973	1.79035	1.21261	1.31161
chr12	104287112	104350307	TXNRD1	495	+	1387.56	1181.62	701.084	1693.04	4335.27	3898.99	TXNRD1	2379.05	0.851581	0.505264	1.22016	3.12438	2.80996	1.71456
chr14	70907589	71115382	PCNX1	83	+	1869.96	2885.47	1991.18	3159.22	4330.03	3646.69	PCNX1	3377.85	1.54307	1.06482	1.68946	2.31557	1.95014	1.80638
chr17	59619987	59696956	CLTC	259	+	1758.51	1736.25	1434.19	2976.54	4293.29	3337.15	CLTC	3263.6	0.987342	0.815571	1.69265	2.44144	1.89771	1.85589
chr16	80541099	80550811	DYNLRB2	39	+	47.2838	67.0688	10.673	5.9698	26.2426	14.8412	DYNLRB2	35.0132	1.41843	0.225722	0.126255	0.555002	0.313875	0.74049
chr15	43772605	43776891	ELL3	20	-	18.5758	24.8682	6.67063	10.7456	10.497	16.9614	ELL3	9.214	1.33874	0.359103	0.578473	0.56509	0.913091	0.496022
chr8	47261026	47736306	SPIDR	196	+	2065.85	2883.21	1660.99	2673.28	4293.29	2968.24	SPIDR	2578.08	1.39565	0.804023	1.29403	2.07822	1.43681	1.24795
chr5	37379388	37753435	WDR70	85	+	1113.42	1706.11	1294.1	2574.18	4288.04	2896.15	WDR70	2786.31	1.53231	1.16227	2.31196	3.85123	2.60113	2.50248
chr11	75815302	76144232	UVRAG	158	+	1290.17	1816.13	1691.67	2610	4285.41	3216.3	UVRAG	3022.19	1.40767	1.3112	2.02299	3.32159	2.49293	2.34247
chr20	8132382	8968360	PLCB1	28	+	485.222	626.98	538.987	1488.87	4280.16	3508.88	PLCB1	1785.67	1.29215	1.1108	3.06843	8.82103	7.23149	3.68011
chr14	67819891	68730218	RAD51B	56	+	1672.38	2063.31	742.442	1627.37	4259.17	2885.55	RAD51B	2686.8	1.23376	0.443943	0.973086	2.54677	1.72542	1.60657
chr18	48539197	48863217	CTIF	45	+	1985.36	2164.29	1641.64	2824.91	4259.17	3710.3	CTIF	3149.35	1.09012	0.826873	1.42287	2.14529	1.86883	1.58629
chr3	99817947	100181732	CMSS1	163	+	601.18	972.121	559.666	1758.7	4232.93	3882.03	CMSS1	2637.05	1.61702	0.930946	2.92541	7.04104	6.45735	4.38646
chr1	24745517	24844321	CLIC4	310	+	694.059	1323.29	1604.29	2232.71	4230.3	3178.13	CLIC4	2812.11	1.9066	2.31146	3.21689	6.09501	4.57905	4.05169
chr2	230416298	230545606	SP100	85	+	1182.1	4440.86	3397.35	4269.6	4193.56	2266.46	SP100	2270.33	3.75675	2.874	3.61188	3.54755	1.91732	1.92059
chr10	31319299	31529814	ZEB1	171	+	2328.73	2068.58	1453.53	2140.77	4188.32	3549.16	ZEB1	3311.51	0.888287	0.624173	0.919286	1.79854	1.52408	1.42202
chr12	2053091	2697950	CACNA1C	59	+	2583.16	2675.22	1713.02	3405.18	4185.69	2408.51	CACNA1C	2382.74	1.03564	0.663149	1.31822	1.62038	0.932389	0.922413
chr2	232697420	232860575	GIGYF2	237	+	1453.42	1788.25	1843.1	3493.53	4167.32	3477.08	GIGYF2	3055.36	1.23037	1.26811	2.40366	2.86725	2.39234	2.10219
chr17	66302691	66810743	PRKCA	769	+	2456.51	2351.93	979.916	1934.22	4167.32	3746.34	PRKCA	2506.21	0.957427	0.398906	0.787385	1.69644	1.52507	1.02023
chr17	28724348	28726129	TLCD1	52	-	27.0193	23.3611	12.0071	25.0732	15.7455	19.0815	TLCD1	12.8996	0.864608	0.44439	0.927974	0.58275	0.706217	0.477422
chr12	14365756	14502935	ATF7IP	237	+	1215.31	1403.92	1080.64	2267.33	4154.2	3307.46	ATF7IP	2909.78	1.15519	0.889189	1.86564	3.41822	2.72149	2.39427
chrX	154477769	154478755	LAGE3	56	-	45.0322	41.447	25.3484	32.2369	26.2426	27.5622	LAGE3	23.9564	0.920386	0.562895	0.715863	0.582752	0.612055	0.531984
chr8	125091941	125367120	NSMCE2	91	+	937.796	1294.65	877.855	1724.08	4130.58	3551.28	NSMCE2	2519.11	1.38052	0.936083	1.83844	4.40456	3.78684	2.6862
chr8	9555997	9782346	TNKS	244	+	1363.35	1654.87	1406.84	2624.33	4112.21	3322.31	TNKS	3035.09	1.21383	1.0319	1.92491	3.01625	2.43687	2.2262
chr2	200306781	200482264	SPATS2L	232	+	1559.8	3303.7	2381.42	2877.45	4083.34	3292.62	SPATS2L	2568.86	2.11803	1.52675	1.84476	2.61786	2.11092	1.64692
chr1	171485621	171593511	PRRC2C	175	+	1191.67	1442.36	1456.2	2804.61	4080.72	3080.61	PRRC2C	2659.16	1.21037	1.22198	2.35351	3.42437	2.58512	2.23146
chr13	75636408	75859870	LMO7	239	+	4133.4	3676.73	2673.59	4613.46	4072.85	2221.94	LMO7	2401.17	0.889517	0.646826	1.11614	0.985351	0.537557	0.580919
chr1	170663237	170739421	PRRX1	142	+	3965.65	3447.64	1735.7	3451.74	4049.23	2792.26	PRRX1	3357.58	0.869376	0.437684	0.87041	1.02108	0.704112	0.846666
chr11	68460824	68615334	PPP6R3	199	+	1098.22	1258.48	1260.75	2620.74	4025.61	2828.31	PPP6R3	2701.54	1.14593	1.14799	2.38635	3.66558	2.57536	2.45993
chr15	99566065	99716466	MEF2A	382	+	1684.77	2100.23	1739.03	2594.48	4012.49	3330.79	MEF2A	3169.62	1.2466	1.03221	1.53996	2.38162	1.977	1.88134
chr3	11272474	11557665	ATG7	154	+	891.638	1379.06	955.902	1853.03	4009.87	3335.03	ATG7	2135.81	1.54666	1.07207	2.07823	4.4972	3.74034	2.39538
chr5	61332333	61546172	ZSWIM6	1075	+	1867.15	2379.06	2293.36	3079.23	4007.24	3173.89	ZSWIM6	2837.91	1.27417	1.22827	1.64916	2.14618	1.69986	1.51992
chr7	39949860	40099580	CDK13	97	+	1325.07	1513.95	1380.82	2385.53	3973.13	3576.73	CDK13	2924.52	1.14254	1.04207	1.8003	2.99843	2.69928	2.20707
chr2	45005182	45009366	SIX2	43	-	17.45	7.53582	7.3377	13.1336	10.497	14.8412	SIX2	14.7424	0.431852	0.420499	0.752642	0.601547	0.850499	0.844837
chr14	101964650	102056443	DYNC1H1	623	+	1210.24	1813.87	1610.29	2568.21	3962.63	3017	DYNC1H1	2703.39	1.49877	1.33055	2.12207	3.27425	2.49289	2.23376
chr15	67065925	67195169	SMAD3	124	+	1834.5	1970.62	1275.43	2701.93	3962.63	3190.85	SMAD3	2696.02	1.0742	0.695247	1.47284	2.16006	1.73936	1.46962
chr6	63635888	63779336	PHF3	167	+	1576.69	1888.48	1220.73	2349.71	3960	3006.4	PHF3	2989.02	1.19775	0.774236	1.49028	2.51159	1.90678	1.89576
chr13	19958897	20091829	ZMYM2	134	+	1832.81	1844.02	1302.77	2944.31	3944.26	3375.31	ZMYM2	3838.55	1.00612	0.710805	1.60645	2.15203	1.8416	2.09435
chr2	169827541	170084131	UBR3	174	+	1281.73	1635.27	1328.12	2516.87	3936.39	3059.4	UBR3	2896.88	1.27583	1.03619	1.96365	3.07115	2.38693	2.26013
chrX	96684919	97604997	DIAPH2	40	+	1353.22	1711.39	1590.95	2589.7	3933.76	3146.33	DIAPH2	2677.59	1.26468	1.17568	1.91373	2.90696	2.32507	1.97868
chr13	111114673	111305737	ARHGEF7	249	+	1466.93	1715.15	1218.06	2478.66	3923.27	3271.42	ARHGEF7	2745.77	1.16921	0.830346	1.68969	2.67448	2.23011	1.87178
chr22	45671939	45845307	ATXN10	179	+	1469.18	1720.43	1170.7	2490.6	3920.64	2881.31	ATXN10	2832.38	1.17101	0.796839	1.69523	2.66859	1.96117	1.92786
chr10	86756670	86932838	BMPR1A	97	+	1260.9	1808.6	1358.81	2367.62	3912.77	2936.43	BMPR1A	2731.03	1.43437	1.07765	1.87772	3.10316	2.32884	2.16594
chr1	162631837	162787405	DDR2	160	+	1403.32	1773.18	868.517	1539.02	3902.27	2841.03	DDR2	3022.19	1.26356	0.618902	1.0967	2.78074	2.02451	2.1536
chr2	216109465	216206303	XRCC5	188	+	1236.7	1479.28	1374.82	2798.64	3886.53	2841.03	XRCC5	2880.3	1.19615	1.11168	2.26299	3.14266	2.29727	2.32902
chr6	163414809	163578592	QKI	180	+	1851.39	2319.53	2101.92	2972.96	3865.53	3103.93	QKI	2965.07	1.25286	1.13532	1.6058	2.08791	1.67654	1.60154
chr7	55019106	55211628	EGFR	351	+	1669.57	1821.41	1273.42	2919.23	3860.28	3031.84	EGFR	2277.7	1.09095	0.762723	1.74849	2.31214	1.81594	1.36424
chr3	128726264	128814796	RAB7A	234	+	953.558	1086.67	1171.36	2403.44	3852.41	2883.43	RAB7A	2528.32	1.1396	1.22841	2.5205	4.04004	3.02386	2.65146
chr6	15246113	15522042	JARID2	191	+	1289.61	1449.89	891.864	3162.8	3852.41	4060.12	JARID2	2731.03	1.12429	0.691577	2.45252	2.98727	3.14833	2.11772
chrX	44873283	45112602	KDM6A	126	+	1064.45	1515.45	2550.18	3130.57	3847.16	3159.05	KDM6A	2852.65	1.42369	2.39577	2.94102	3.61422	2.96778	2.67993
chr21	34073658	34143034	MRPS6	353	+	946.803	1162.02	1740.37	5105.38	3841.91	3799.34	MRPS6	3357.58	1.22731	1.83815	5.39223	4.05777	4.01281	3.54623
chr5	36876865	37066413	NIPBL	106	+	1487.75	1762.63	1572.94	2512.09	3823.54	3095.45	NIPBL	2797.37	1.18476	1.05726	1.68852	2.57002	2.08063	1.88027
chr10	87863715	87971930	PTEN	318	+	2480.71	2277.33	1468.21	2429.71	3823.54	3000.04	PTEN	2861.87	0.918015	0.591851	0.979441	1.54131	1.20935	1.15365
chr17	29390451	29551904	TAOK1	99	+	1292.99	1403.17	1217.39	2503.74	3815.67	2919.47	TAOK1	2743.93	1.08521	0.941531	1.9364	2.95104	2.25792	2.12216
chr2	36355846	36551135	CRIM1	205	+	2068.11	2122.09	1479.55	2882.22	3810.42	2857.99	CRIM1	1881.5	1.0261	0.715412	1.39365	1.84246	1.38193	0.909768
chr2	71331866	71435069	ZNF638	237	+	1336.33	1538.06	1416.18	2685.22	3802.55	2754.1	ZNF638	2517.26	1.15096	1.05975	2.0094	2.84552	2.06094	1.88371
chr5	172983897	173035445	ATP6V0E1	138	+	642.835	799.551	717.093	1587.97	3794.68	3050.92	ATP6V0E1	2132.12	1.24379	1.11552	2.47026	5.90304	4.74604	3.31675
chr1	88684369	88836255	PKN2	212	+	1057.13	1266.77	1048.62	2044.06	3786.8	2883.43	PKN2	2565.18	1.19831	0.99195	1.93359	3.58215	2.7276	2.42655
chr16	31201486	31202655	PYCARD	19	-	12.3839	12.8109	8.67182	15.5215	7.87277	6.36051	PYCARD	12.8996	1.03448	0.70025	1.25336	0.635726	0.513611	1.04164
chr5	177133814	177300215	NSD1	65	+	1048.13	1329.32	755.783	2543.14	3778.93	2788.02	NSD1	2734.72	1.26828	0.721078	2.42636	3.6054	2.65999	2.60914
chr17	17042557	17217679	MPRIP	249	+	1097.66	1133.39	608.362	2260.17	3778.93	3424.07	MPRIP	2867.4	1.03255	0.554235	2.05908	3.44271	3.11943	2.61228
chr2	190880899	190965552	GLS	1122	+	1476.49	1551.63	925.217	1910.34	3778.93	3023.36	GLS	2825.01	1.05089	0.626633	1.29384	2.5594	2.04767	1.91333
chr5	108749061	109196841	FER	140	+	2034.33	2675.97	1353.47	2636.27	3778.93	2936.43	FER	2296.13	1.31541	0.665315	1.29589	1.85758	1.44344	1.12869
chr9	37120660	37358149	ZCCHC7	142	+	1307.06	1493.6	995.259	1955.71	3757.94	3589.45	ZCCHC7	2445.4	1.14272	0.761449	1.49627	2.87511	2.7462	1.87092
chr5	34656458	34832612	RAI14	142	+	2260.62	2138.67	1270.09	3205.78	3755.31	3243.86	RAI14	2701.54	0.946055	0.561833	1.4181	1.66119	1.43494	1.19504
chr22	46762730	47175699	TBC1D22A	113	+	795.945	1096.46	1085.31	2432.1	3747.44	2915.23	TBC1D22A	2283.23	1.37756	1.36355	3.05561	4.70816	3.6626	2.86858
chr11	9384715	9448127	IPO7	206	+	719.39	945.746	994.592	2029.73	3742.19	2749.86	IPO7	2353.26	1.31465	1.38255	2.82146	5.20189	3.82249	3.27119
chr5	140401938	140549569	ANKHD1-EIF4EBP3	141	+	1126.37	1338.36	1438.86	2434.49	3713.32	3192.97	ANKHD1-EIF4EBP3	2876.61	1.18821	1.27743	2.16136	3.29671	2.83474	2.55388
chr10	89302128	89309271	IFIT2	283	+	63.608	7619.47	8284.26	6119.05	3700.2	1367.51	IFIT2	2371.68	119.788	130.239	96.1994	58.1719	21.499	37.2859
chr11	102110521	102233424	YAP1	155	+	1841.82	2037.69	1264.75	2453.59	3694.95	2974.6	YAP1	2836.07	1.10635	0.686685	1.33216	2.00614	1.61503	1.53982
chr13	48303883	48599436	RB1	169	+	1881.78	2306.72	1779.73	2675.67	3694.95	2915.23	RB1	3171.46	1.22582	0.945769	1.42188	1.96354	1.54919	1.68535
chr4	1870656	1982207	NSD2	57	+	616.379	722.685	879.857	2035.7	3676.59	3339.27	NSD2	2906.1	1.17247	1.42746	3.30268	5.96482	5.41756	4.71479
chr5	72107494	72209565	MAP1B	100	+	2030.39	1445.37	716.426	1201.12	3655.59	4191.57	MAP1B	2546.75	0.711868	0.352851	0.591571	1.80044	2.06442	1.25432
chr9	110048777	110172512	AKAP2	268	+	994.087	1256.98	1024.61	2914.46	3645.09	2631.13	AKAP2	2423.28	1.26446	1.0307	2.9318	3.66677	2.64678	2.43769
chr2	45651404	46187990	PRKCE	70	+	1457.36	1849.29	1227.4	2263.75	3629.35	3080.61	PRKCE	2377.21	1.26893	0.842208	1.55332	2.49036	2.11383	1.63118
chr8	22367362	22434129	SLC39A14	107	+	604.558	1053.51	1152.02	2416.58	3624.1	3301.1	SLC39A14	2185.56	1.74261	1.90556	3.99727	5.99463	5.46035	3.61514
chr17	60677958	61392838	BCAS3	121	+	741.343	1096.46	758.451	1595.13	3624.1	3127.25	BCAS3	2351.41	1.47902	1.02308	2.15168	4.88856	4.21836	3.17182
chr4	147732177	148072780	ARHGAP10	88	+	1824.37	1914.1	989.922	2600.45	3621.48	2679.89	ARHGAP10	2657.32	1.04918	0.54261	1.4254	1.98506	1.46894	1.45657
chr1	156213081	156243332	PMF1-BGLAP	109	+	2889.94	5250.96	5180.41	4300.65	3595.23	2330.07	PMF1-BGLAP	5511.81	1.81698	1.79257	1.48815	1.24405	0.806269	1.90724
chr10	35336599	35572669	CCNY	109	+	937.796	1111.53	867.85	1823.18	3571.61	3203.58	CCNY	2436.18	1.18526	0.925414	1.94411	3.80851	3.41607	2.59777
chr7	116953571	117230103	ST7	78	+	1714.6	1949.52	1035.28	2214.8	3555.87	2703.22	ST7	2275.86	1.13701	0.603803	1.29173	2.07388	1.57659	1.32734
chr1	156213081	156240042	PMF1	109	+	2874.75	5237.4	5173.74	4279.16	3555.87	2300.38	PMF1	5486.02	1.82186	1.79972	1.48853	1.23693	0.800202	1.90835
chr6	28324693	28335833	ZSCAN31	31	-	23.6419	20.3467	16.6766	23.8792	15.7455	23.3219	ZSCAN31	51.5984	0.86062	0.705383	1.01004	0.666	0.986465	2.1825
chr4	2536748	2732565	FAM193A	147	+	1022.23	1205.73	1026.61	2416.58	3540.12	2609.93	FAM193A	2491.47	1.17951	1.00428	2.36403	3.46313	2.55317	2.43729
chr22	40044890	40335808	TNRC6B	51	+	1451.16	2222.31	1210.72	2153.91	3524.38	3137.85	TNRC6B	2506.21	1.5314	0.834312	1.48427	2.42866	2.1623	1.72704
chr7	157139033	157269370	UBE3C	212	+	1097.1	1348.16	1103.32	2551.49	3516.51	3144.21	UBE3C	2631.52	1.22884	1.00567	2.32567	3.20528	2.86593	2.39861
chr1	213051370	213274774	RPS6KC1	60	+	896.704	1405.43	2483.48	3692.92	3487.64	2531.48	RPS6KC1	2425.12	1.56733	2.76956	4.11833	3.8894	2.82309	2.70448
chr14	21098900	21103724	TMEM253	31	+	38.8403	54.2579	20.0119	40.5947	26.2426	31.8025	TMEM253	38.6988	1.39695	0.515235	1.04517	0.675654	0.818802	0.996357
chr6	157021670	157210779	ARID1B	137	+	1070.08	1421.26	915.878	1973.62	3479.77	2319.47	ARID1B	2128.43	1.32818	0.855897	1.84437	3.25188	2.16757	1.98904
chr16	11976825	12574287	SNX29	279	+	1163.52	1533.54	871.185	2177.78	3471.89	2607.81	SNX29	2489.62	1.31802	0.748749	1.87172	2.98395	2.24131	2.13973
chr20	13995588	16053197	MACROD2	103	+	777.932	1076.12	1056.63	1770.64	3469.27	2289.78	MACROD2	2045.51	1.38331	1.35825	2.27609	4.45961	2.94342	2.62942
chr4	122923182	123319433	SPATA5	68	+	761.045	1134.89	773.794	2238.68	3453.52	2987.32	SPATA5	2519.11	1.49123	1.01675	2.94159	4.53787	3.92529	3.31007
chr6	5261614	5829192	FARS2	31	+	874.751	1269.79	699.75	1689.45	3450.9	2503.92	FARS2	1743.29	1.4516	0.799942	1.93135	3.94501	2.86244	1.9929
chr2	69013442	69249327	ANTXR1	58	+	6916.95	6154.51	1592.95	2038.09	3443.03	2056.56	ANTXR1	2563.33	0.889772	0.230297	0.294652	0.497767	0.297322	0.370587
chr4	20251983	20620561	SLIT2	126	+	4193.63	3958.57	2240.67	2353.3	3424.66	2724.42	SLIT2	2185.56	0.943948	0.534303	0.561161	0.816634	0.649657	0.521162
chr19	47745602	47757058	NOP53	36	+	230.227	264.507	388.898	973.078	3419.41	2512.4	NOP53	1481.61	1.1489	1.68919	4.2266	14.8523	10.9127	6.43543
chr8	143566192	143568798	MROH6	74	-	38.2774	51.2436	20.679	15.5215	26.2426	25.442	MROH6	16.5852	1.33874	0.54024	0.4055	0.68559	0.664674	0.43329
chr3	37243360	37366751	GOLGA4	146	+	1347.03	1430.3	1296.77	2372.4	3419.41	2883.43	GOLGA4	2498.84	1.06182	0.962688	1.76121	2.53848	2.14058	1.85507
chr4	159103191	159360174	RAPGEF2	142	+	1431.46	1671.45	1434.19	2267.33	3419.41	3243.86	RAPGEF2	2439.87	1.16765	1.00191	1.58393	2.38876	2.26612	1.70446
chr9	122941108	123104866	RABGAP1	187	+	1580.63	1643.56	1314.11	2485.83	3374.8	2735.02	RABGAP1	2430.65	1.03981	0.831384	1.57268	2.1351	1.73034	1.53777
chr20	41028927	41124487	TOP1	390	+	897.83	1321.78	1104.66	2569.4	3369.55	2652.33	TOP1	2819.48	1.47219	1.23037	2.86179	3.75299	2.95416	3.14033
chr13	98143203	98455176	FARP1	119	+	1471.99	1415.23	787.135	1997.5	3364.3	2578.13	FARP1	2474.88	0.96144	0.534742	1.35701	2.28555	1.75146	1.68132
chr17	42038232	42050483	C17orf113	23	-	15.1984	12.8109	5.33651	8.35773	10.497	14.8412	C17orf113	22.1136	0.842911	0.351123	0.549909	0.690665	0.976498	1.455
chr22	20117627	20127355	RANBP1	89	+	253.869	290.129	334.199	1049.49	3338.06	2807.1	RANBP1	2119.22	1.14283	1.31642	4.13398	13.1487	11.0573	8.34769
chr12	25958771	26079892	RASSF8	172	+	1189.98	1220.05	857.844	2464.34	3335.43	2310.98	RASSF8	2332.98	1.02527	0.720889	2.07091	2.80293	1.94203	1.96052
chr19	10566462	10568886	CDKN2D	70	-	48.9726	58.0258	40.0238	58.5041	34.1153	40.2832	CDKN2D	66.3408	1.18486	0.817269	1.19463	0.69662	0.822566	1.35465
chr2	46699372	46780245	SOCS5	106	+	7347.57	5770.18	3195.9	4027.23	3335.43	2001.44	SOCS5	2344.04	0.785318	0.43496	0.548104	0.45395	0.272395	0.319022
chr4	2469213	2625320	RNF4	167	+	1111.73	1272.8	1225.4	2607.61	3330.18	2635.37	RNF4	2452.77	1.14488	1.10225	2.34554	2.99549	2.37051	2.20626
chr22	41091834	41180077	EP300	150	+	1173.65	1157.5	1097.99	2023.76	3327.56	2732.9	EP300	2353.26	0.98624	0.935534	1.72433	2.83522	2.32855	2.00508
chr14	61695598	61748259	HIF1A	700	+	1296.37	1691.79	1105.32	2475.08	3322.31	2482.72	HIF1A	2421.44	1.30502	0.852627	1.90924	2.56278	1.91513	1.86786
chrX	41085442	41236579	USP9X	83	+	1206.86	1476.27	1394.83	2372.4	3317.06	2474.24	USP9X	2244.53	1.22323	1.15575	1.96576	2.7485	2.05015	1.85981
chr19	24033547	24129961	ZNF254	162	+	1615.53	1672.95	1231.4	2403.44	3309.19	2747.74	ZNF254	2979.81	1.03554	0.762227	1.48771	2.04836	1.70083	1.84448
chr22	24270955	24442356	SPECC1L-ADORA2A	128	+	1027.3	1166.55	788.469	1876.91	3306.56	2482.72	SPECC1L-ADORA2A	2408.54	1.13555	0.767516	1.82703	3.21869	2.41674	2.34453
chr10	96832364	96995959	LCOR	66	+	1401.63	1569.71	901.87	1691.84	3303.94	2650.21	LCOR	2272.17	1.11992	0.643444	1.20705	2.35721	1.89081	1.62109
chr7	18509376	19002416	HDAC9	33	+	649.027	1224.57	463.609	1675.13	3280.32	1768.22	HDAC9	1723.02	1.88678	0.714314	2.58099	5.05421	2.72442	2.65477
chr14	103629287	103714249	KLC1	253	+	1075.14	1102.49	1027.28	2220.77	3277.7	2826.19	KLC1	2327.46	1.02544	0.955485	2.06556	3.04863	2.62867	2.1648
chr17	7887891	7912760	CHD3	35	+	372.079	403.167	400.905	1297.84	3275.07	2870.71	CHD3	1321.29	1.08355	1.07747	3.48808	8.80208	7.71532	3.5511
chr9	17135111	17503923	CNTLN	190	+	1084.15	1293.15	865.848	1921.08	3275.07	2349.15	CNTLN	2731.03	1.19278	0.798642	1.77197	3.02086	2.16681	2.51905
chr1	178094173	178484147	RASAL2	44	+	1593.58	2090.44	1142.01	2093.01	3269.83	2470	RASAL2	1822.53	1.31179	0.716632	1.3134	2.05188	1.54997	1.14367
chr19	47036093	47045775	NPAS1	32	+	33.2113	36.172	9.33889	26.2671	23.6183	29.6824	NPAS1	27.642	1.08915	0.281196	0.790909	0.711153	0.893744	0.832307
chr16	24729765	24827632	TNRC6A	61	+	1035.74	1115.3	733.103	1678.71	3264.58	2410.63	TNRC6A	1973.64	1.07681	0.707806	1.62078	3.15193	2.32745	1.90554
chr17	35587417	35726413	AP2B1	102	+	954.683	1168.05	924.55	1946.16	3259.33	2563.28	AP2B1	2432.5	1.2235	0.968437	2.03854	3.41404	2.68495	2.54797
chr2	54456406	54671446	SPTBN1	133	+	1188.85	1218.54	815.819	2229.12	3251.46	2654.45	SPTBN1	2876.61	1.02497	0.686225	1.87502	2.73496	2.23279	2.41966
chr12	68610997	68671901	RAP1B	387	+	1323.95	1314.25	1029.28	2268.53	3248.83	2648.09	RAP1B	2532.01	0.992673	0.777431	1.71346	2.45389	2.00014	1.91247
chr7	155644760	155781485	RBM33	127	+	1132	1346.65	1206.72	2300.76	3246.21	2387.31	RBM33	2369.84	1.18962	1.06601	2.03247	2.86768	2.10893	2.0935
chr12	43836158	44389762	TMEM117	128	+	1375.17	1880.19	571.006	1818.4	3240.96	2851.63	TMEM117	1874.13	1.36724	0.415226	1.32231	2.35677	2.07366	1.36284
chr6	126340227	126348875	CENPW	34	+	43.3435	61.7937	40.0238	58.5041	31.4911	29.6824	CENPW	36.856	1.42567	0.92341	1.34978	0.726547	0.684818	0.850324
chr5	140401938	140539856	ANKHD1	141	+	958.624	1149.97	1260.08	2158.68	3238.33	2751.98	ANKHD1	2450.92	1.1996	1.31447	2.25185	3.3781	2.87076	2.55671
chr2	109129275	109504632	SH3RF3	23	+	1288.48	1345.14	809.815	1911.53	3233.09	3000.04	SH3RF3	2496.99	1.04397	0.628504	1.48355	2.50923	2.32836	1.93793
chr15	64460660	64686068	ZNF609	63	+	1026.73	1150.72	723.764	1958.1	3227.84	2181.65	ZNF609	2274.02	1.12076	0.704921	1.90712	3.14381	2.12485	2.21482
chr1	161304735	161306138	MPZ	59	-	10.6952	9.79657	6.67063	13.1336	7.87277	21.2017	MPZ	14.7424	0.915978	0.623703	1.22799	0.736103	1.98236	1.37841
chr12	6346843	6364097	SCNN1A	83	-	42.7806	66.3152	51.3639	47.7584	31.4911	31.8025	SCNN1A	70.0264	1.55012	1.20064	1.11636	0.736107	0.743386	1.63687
chr7	105013296	105115019	KMT2E	233	+	2077.67	1540.32	1379.49	2568.21	3227.84	2942.79	KMT2E	3156.72	0.741369	0.66396	1.2361	1.55359	1.41639	1.51936
chr6	42890265	42890744	C6orf226	171	-	24.7677	15.8252	14.6754	27.4611	18.3698	12.721	C6orf226	31.3276	0.638945	0.592522	1.10875	0.741684	0.513612	1.26486
chr21	41426325	41459214	MX1	110	+	131.719	6027.9	3719.55	3105.49	3222.59	1649.49	MX1	1864.91	45.7633	28.2385	23.5766	24.4656	12.5228	14.1582
chr5	72816756	72916733	TNPO1	422	+	2732.33	2411.46	1514.23	2658.95	3217.34	2431.83	TNPO1	2911.62	0.882565	0.55419	0.973144	1.17751	0.890021	1.06562
chr8	26291606	26372680	PPP2R2A	229	+	964.253	1912.59	1590.95	2416.58	3212.09	2400.03	PPP2R2A	2257.43	1.98349	1.64993	2.50617	3.33117	2.489	2.34112
chr17	62478916	62615481	TLK2	169	+	1186.6	1663.91	1562.93	2601.64	3209.47	2518.76	TLK2	2336.67	1.40225	1.31715	2.19252	2.70476	2.12267	1.96921
chr5	62306293	62537249	KIF2A	118	+	1406.13	1650.35	1379.49	2377.18	3206.84	2673.53	KIF2A	2832.38	1.17368	0.981054	1.69058	2.28061	1.90134	2.01431
chr6	148342923	148552048	SASH1	150	+	1549.67	1898.27	1017.94	2235.09	3198.97	2599.33	SASH1	2465.67	1.22495	0.656875	1.4423	2.06429	1.67734	1.59109
chr12	50505101	50748657	DIP2B	63	+	897.267	1337.61	1696.34	2421.35	3193.72	2168.93	DIP2B	2091.58	1.49076	1.89056	2.69858	3.55939	2.41726	2.33106
chr10	12349656	12835545	CAMK1D	101	+	1051.5	1157.5	841.834	1859	3193.72	2347.03	CAMK1D	2471.19	1.10081	0.800603	1.76795	3.0373	2.23208	2.35016
chr1	167936776	168075843	DCAF6	282	+	1645.37	1623.22	1302.77	2467.92	3193.72	2253.74	DCAF6	2535.69	0.986538	0.791779	1.49992	1.94103	1.36975	1.54111
chr1	198157112	198322420	NEK7	200	+	1904.86	2052.76	1430.85	2145.55	3191.1	2506.04	NEK7	2364.31	1.07764	0.751158	1.12636	1.67524	1.3156	1.2412
chr3	41199582	41260096	CTNNB1	699	+	922.035	1058.03	1031.95	2263.75	3183.22	2366.11	CTNNB1	2473.04	1.14749	1.11921	2.45517	3.45239	2.56618	2.68215
chr5	102866005	103031105	PAM	26	+	2072.05	2293.9	1019.27	2223.16	3183.22	2253.74	PAM	1844.64	1.10707	0.491914	1.07293	1.53627	1.08769	0.890249
chr4	76949840	77040384	SEPT11	612	+	1811.98	1471.75	787.135	1498.42	3170.1	2919.47	SEPT11	2137.65	0.812233	0.434406	0.826952	1.74952	1.6112	1.17973
chr16	82627106	83800640	CDH13	38	+	883.195	1104	376.224	1561.7	3167.48	2113.81	CDH13	2200.3	1.25001	0.425981	1.76824	3.58639	2.39337	2.4913
chr10	11018031	11336675	CELF2	44	+	612.438	776.943	599.69	1887.65	3159.61	2531.48	CELF2	1756.19	1.26861	0.979185	3.08219	5.15907	4.13345	2.86754
chr14	65411978	65744121	FUT8	189	+	1697.15	1935.95	1158.69	2398.67	3156.98	2118.05	FUT8	2801.06	1.14071	0.682727	1.41335	1.86017	1.248	1.65045
chr12	65824309	65966295	HMGA2	96	+	3059.94	2969.11	2123.26	3647.55	3154.36	2597.21	HMGA2	2338.51	0.970316	0.693889	1.19203	1.03086	0.848778	0.764234
chr1	203626912	203744081	ATP2B4	62	+	1848.57	1367.75	846.503	2110.92	3151.73	2033.24	ATP2B4	1920.2	0.739896	0.457923	1.14192	1.70496	1.0999	1.03875
chr8	25184812	25418082	DOCK5	92	+	996.338	926.906	422.918	1789.75	3149.11	2860.11	DOCK5	1905.46	0.930313	0.424472	1.79633	3.16068	2.87062	1.91246
chr3	132417602	132539032	DNAJC13	275	+	1774.83	2260.75	1676.33	2650.59	3149.11	2306.74	DNAJC13	2285.07	1.27378	0.944502	1.49343	1.77432	1.2997	1.28749
chr17	59707761	59842255	VMP1	222	+	1617.78	2293.15	1634.97	3017.14	3135.99	2188.01	VMP1	2196.62	1.41747	1.01063	1.86499	1.93845	1.35248	1.3578
chr15	80779448	80951776	CEMIP	85	+	10476.7	8295.43	2666.25	4669.58	3135.99	754.78	CEMIP	1164.65	0.791798	0.254493	0.445711	0.29933	0.0720437	0.111166
chr6	75602079	75718281	SENP6	126	+	1276.66	1357.2	963.24	1952.13	3130.74	2620.53	SENP6	2323.77	1.06309	0.7545	1.52909	2.45229	2.05265	1.82019
chr2	131035069	131035262	SMIM39	24	+	13.5097	9.79657	4.66944	9.55169	10.497	16.9614	SMIM39	20.2708	0.725151	0.345636	0.707025	0.776997	1.2555	1.50046
chrX	104112604	104115846	ZCCHC18	21	+	13.5097	15.8252	14.0083	17.9094	10.497	8.48068	ZCCHC18	20.2708	1.1714	1.03691	1.32567	0.776997	0.627747	1.50046
chr1	155139891	155140454	DPM3	39	-	16.8871	21.8539	10.673	22.6853	13.1213	25.442	DPM3	27.642	1.29412	0.632021	1.34335	0.777001	1.50659	1.63687
chr11	124740028	124747210	NRGN	25	+	3.37742	5.27508	0.667063	7.16377	2.62426	4.24034	NRGN	14.7424	1.56187	0.197507	2.12108	0.777001	1.2555	4.36499
chr15	32718083	32745106	GREM1	340	+	2420.48	3210.26	4247.86	4910.76	3122.87	1581.65	GREM1	2062.09	1.32629	1.75497	2.02884	1.29019	0.653445	0.851934
chr8	122781864	122974510	ZHX2	45	+	929.916	1039.19	1180.7	2242.26	3120.24	2720.18	ZHX2	2170.82	1.11751	1.26968	2.41125	3.3554	2.92519	2.33443
chr7	90154550	90164829	STEAP1	41	+	43.3435	94.1978	64.7052	52.5343	34.1153	42.4034	STEAP1	29.4848	2.17329	1.49285	1.21205	0.787091	0.97831	0.680259
chr14	103385495	103503831	MARK3	148	+	1007.6	1067.83	921.215	1970.04	3117.62	2573.89	MARK3	2288.76	1.05978	0.914267	1.95518	3.0941	2.55448	2.2715
chr12	28191063	28581511	CCDC91	220	+	810.017	984.178	686.408	1743.18	3109.75	2762.58	CCDC91	2314.56	1.21501	0.847399	2.15203	3.83912	3.41052	2.85742
chr11	120336480	120489937	ARHGEF12	371	+	1103.29	1241.15	953.901	1874.52	3109.75	2514.52	ARHGEF12	2161.6	1.12495	0.864597	1.69903	2.81862	2.27911	1.95923
chr3	184812259	185052614	VPS8	198	+	822.964	1097.22	734.437	1724.08	3107.12	2565.4	VPS8	2089.74	1.33325	0.892429	2.09496	3.77552	3.11727	2.53928
chr2	231056972	231172827	PSMD1	121	+	892.764	1050.49	1075.97	2461.95	3107.12	2321.59	PSMD1	2231.63	1.17667	1.20521	2.75767	3.48034	2.60045	2.49969
chr1	182839430	182887982	DHX9	454	+	1004.22	1082.14	1081.31	2342.55	3107.12	2383.07	DHX9	2740.24	1.07759	1.07677	2.33271	3.09406	2.37306	2.72872
chr11	26994184	26996121	FIBIN	91	+	29.8339	17.3324	6.67063	19.1034	23.6183	44.5236	FIBIN	14.7424	0.580963	0.223592	0.640325	0.79166	1.49238	0.494149
chr2	135052367	135176394	RAB3GAP1	144	+	1033.49	1675.97	1464.2	2128.83	3101.87	2306.74	RAB3GAP1	1780.14	1.62166	1.41675	2.05985	3.00135	2.23199	1.72245
chr12	65278788	65491430	MSRB3	32	+	1178.72	1417.49	1041.29	1862.58	3091.38	2022.64	MSRB3	1533.21	1.20257	0.883407	1.58017	2.62266	1.71596	1.30074
chr6	154733496	154834244	SCAF8	120	+	1280.04	1662.4	1442.86	2248.23	3091.38	2211.34	SCAF8	2581.76	1.29871	1.1272	1.75637	2.41507	1.72756	2.01694
chr21	33542321	33577514	SON	357	+	1035.74	1180.11	1206.05	2040.48	3086.13	2139.25	SON	2087.89	1.13939	1.16443	1.97007	2.97964	2.06543	2.01584
chr3	39406797	39412542	RPSA	631	+	345.622	427.281	729.1	1142.62	3083.5	2777.42	RPSA	2080.52	1.23627	2.10953	3.30598	8.9216	8.036	6.01964
chr2	231961798	232344350	DIS3L2	116	+	856.175	1122.08	824.49	1719.3	3083.5	2554.8	DIS3L2	2062.09	1.31057	0.962992	2.00812	3.60148	2.98397	2.40849
chr11	67119354	67258082	KDM2A	172	+	1372.92	1692.55	1390.16	2580.15	3078.25	2438.19	KDM2A	2484.09	1.23281	1.01256	1.87932	2.24212	1.77592	1.80935
chr13	28138302	28295335	PAN3	105	+	1053.19	1094.2	915.878	1907.95	3075.63	2387.31	PAN3	2106.32	1.03894	0.869623	1.81159	2.9203	2.26674	1.99994
chr19	54094668	54102567	OSCAR	44	-	46.158	82.8941	54.0321	64.4739	36.7396	40.2832	OSCAR	60.8124	1.79588	1.17059	1.39681	0.795953	0.872724	1.31748
chr6	108559870	108684774	FOXO3	80	+	1262.03	1336.85	1011.27	1725.27	3073.01	3080.61	FOXO3	1916.51	1.05929	0.801304	1.36706	2.43497	2.441	1.51859
chr4	183099257	183320777	WWC2	198	+	928.227	1012.06	730.434	1746.76	3062.51	2419.11	WWC2	1870.44	1.09032	0.786913	1.88182	3.29931	2.60616	2.01507
chr1	35268796	35422058	ZMYM4	89	+	1022.79	1271.29	1168.7	2311.51	3062.51	2143.49	ZMYM4	2391.95	1.24296	1.14266	2.26	2.99427	2.09573	2.33865
chr18	79069501	79378287	ATP9B	253	+	743.595	1116.06	879.19	1884.07	3057.26	2546.32	ATP9B	2368	1.5009	1.18235	2.53373	4.11146	3.42434	3.18453
chr4	6782808	6884170	KIAA0232	261	+	766.674	791.261	713.091	1435.14	3054.64	2658.69	KIAA0232	1964.42	1.03207	0.93011	1.8719	3.98427	3.46782	2.56226
chr18	56651447	57036606	WDR7	118	+	876.44	1363.98	851.84	1820.79	3054.64	2317.35	WDR7	2137.65	1.55627	0.971932	2.07748	3.48528	2.64405	2.43901
chr2	152335246	152649826	FMNL2	141	+	638.332	858.33	682.406	2116.89	3052.01	2894.03	FMNL2	2438.02	1.34465	1.06905	3.31628	4.78123	4.53374	3.81936
chr13	110307359	110513209	COL4A2	198	+	838.162	1421.26	2008.53	2744.92	3052.01	2406.39	COL4A2	2546.75	1.69569	2.39635	3.27493	3.64131	2.87103	3.03849
chr1	200739001	200860704	CAMSAP2	142	+	1290.74	1476.27	1034.62	2022.57	3031.02	2344.91	CAMSAP2	2121.06	1.14374	0.801571	1.56698	2.34828	1.81672	1.64329
chr10	112950372	113167678	TCF7L2	209	+	1634.67	1486.06	729.1	1671.55	3031.02	2622.65	TCF7L2	2227.95	0.909089	0.446023	1.02256	1.85421	1.60439	1.36294
chr17	67825588	67984378	BPTF	249	+	1055.44	1316.51	1163.36	2058.39	3025.77	2281.3	BPTF	2262.96	1.24736	1.10225	1.95027	2.86683	2.16147	2.14409
chr2	23385279	23708611	KLHL29	376	+	1175.9	1170.31	1224.73	2108.53	3025.77	2544.2	KLHL29	1769.09	0.995246	1.04153	1.79312	2.57315	2.16362	1.50446
chr3	9397721	9479240	SETD5	196	+	1344.21	1229.85	915.211	1979.59	3025.77	2327.95	SETD5	2347.73	0.914924	0.680854	1.47268	2.25097	1.73184	1.74655
chr9	134641871	134844843	COL5A1	241	+	1873.9	1333.09	856.509	2004.66	3025.77	2904.63	COL5A1	2084.21	0.711399	0.457073	1.06978	1.61469	1.55005	1.11223
chr9	125746794	125967377	PBX3	260	+	2297.21	2071.6	1406.84	2147.94	3025.77	2629.01	PBX3	2568.86	0.90179	0.612412	0.935021	1.31715	1.14444	1.11825
chr8	17922901	18029944	PCM1	172	+	1216.43	1334.59	1002.6	1950.93	2991.65	2423.35	PCM1	2408.54	1.09714	0.824215	1.60382	2.45937	1.99218	1.98001
chr1	193122130	193254815	CDC73	100	+	991.835	1370.01	1253.41	2126.44	2989.03	2168.93	CDC73	2314.56	1.38129	1.26373	2.14395	3.01364	2.18679	2.33361
chr3	49940558	50100045	RBM6	202	+	1001.4	1168.05	972.578	1980.78	2989.03	2304.62	RBM6	2148.7	1.16642	0.971218	1.97801	2.98485	2.3014	2.1457
chr11	28108479	28527041	METTL15	129	+	1224.31	1614.17	741.107	1370.67	2989.03	2501.8	METTL15	1874.13	1.31843	0.605326	1.11954	2.4414	2.04344	1.53076
chr6	57317714	57646850	PRIM2	65	+	1179.28	1258.48	691.745	2411.8	2975.91	1844.55	PRIM2	1864.91	1.06716	0.586582	2.04515	2.5235	1.56413	1.5814
chr4	86594406	86815171	PTPN13	343	+	2320.29	2308.98	948.564	1278.73	2973.28	2211.34	PTPN13	2399.33	0.995126	0.408813	0.551108	1.28143	0.953045	1.03406
chr12	110281336	110351093	ATP2A2	401	+	1214.74	1067.07	883.192	2113.31	2968.04	2283.42	ATP2A2	2279.54	0.878435	0.727063	1.73972	2.44335	1.87976	1.87657
chr6	4776500	4955551	CDYL	111	+	943.988	903.545	659.726	1955.71	2957.54	2698.98	CDYL	2493.31	0.957157	0.698871	2.07175	3.13303	2.85913	2.64125
chr10	84328702	84518521	CCSER2	194	+	1125.24	1369.26	826.492	1767.06	2957.54	2735.02	CCSER2	2535.69	1.21686	0.734503	1.57038	2.62836	2.43061	2.25347
chr17	57256679	57684689	MSI2	30	+	209.4	334.591	799.142	1746.76	2954.91	1800.02	MSI2	1711.96	1.59786	3.81634	8.34174	14.1113	8.59608	8.17555
chr3	151085778	151437072	MED12L	40	+	370.953	753.582	1227.4	1582	2949.67	1710.98	MED12L	1641.93	2.03148	3.30877	4.26469	7.9516	4.61239	4.42625
chr1	35931205	36072500	AGO3	94	+	839.288	1124.34	1031.95	1701.39	2949.67	2450.92	AGO3	1905.46	1.33964	1.22955	2.02718	3.51449	2.92024	2.27033
chrY	12662439	12860839	USP9Y	41	+	1090.34	1308.97	859.178	1925.86	2947.04	2035.36	USP9Y	2074.99	1.20052	0.787991	1.76629	2.70286	1.86672	1.90307
chr12	45729186	45908040	ARID2	77	+	1209.12	1204.22	735.771	2156.29	2947.04	2408.51	ARID2	2419.6	0.995947	0.608518	1.78335	2.43734	1.99195	2.00112
chr2	159712612	159771027	MARCH7	265	+	1244.58	1207.99	1000.6	2169.43	2941.79	2213.46	MARCH7	2093.42	0.970601	0.803966	1.7431	2.36368	1.77848	1.68203
chr6	125781244	125932034	NCOA7	198	+	1313.82	2562.93	1476.21	1587.97	2941.79	2408.51	NCOA7	2062.09	1.95075	1.1236	1.20867	2.23911	1.83321	1.56954
chrX	103330314	103332326	TCEAL7	57	+	25.3306	25.6218	8.00476	33.4309	20.9941	25.442	TCEAL7	35.0132	1.0115	0.316011	1.31978	0.828804	1.0044	1.38225
chr14	55580317	55701526	KTN1	87	+	882.069	1061.8	1027.28	1859	2933.92	2306.74	KTN1	2051.04	1.20376	1.16463	2.10754	3.32618	2.61515	2.32526
chr2	148644829	148787569	EPC2	375	+	1024.48	1535.8	1426.85	1959.29	2920.8	2232.54	EPC2	2196.62	1.4991	1.39276	1.91247	2.85101	2.17919	2.14413
chr11	35139246	35232402	CD44	356	+	2757.66	2504.91	1711.02	2892.97	2920.8	2607.81	CD44	2677.59	0.908346	0.620461	1.04907	1.05916	0.94566	0.970965
chr2	151410010	151508013	RIF1	153	+	922.598	1311.99	972.578	1928.25	2918.17	2185.89	RIF1	2095.26	1.42206	1.05417	2.09002	3.16299	2.36928	2.27104
chr11	43680841	43856617	HSD17B12	186	+	634.955	816.13	610.363	1626.17	2915.55	2094.73	HSD17B12	1890.71	1.28534	0.96127	2.56108	4.59174	3.29902	2.97771
chr8	6406718	6648508	MCPH1	184	+	722.204	1060.29	1047.96	2095.4	2902.43	2228.3	MCPH1	2087.89	1.46813	1.45106	2.9014	4.01885	3.08542	2.891
chr5	170862115	171300015	RANBP17	81	+	646.213	840.244	531.65	1516.33	2899.8	2355.51	RANBP17	2224.26	1.30026	0.822716	2.34649	4.48737	3.6451	3.44199
chr4	85475260	86002668	ARHGAP24	48	+	933.856	1125.1	550.327	1234.56	2894.56	2414.87	ARHGAP24	2224.26	1.20479	0.589306	1.322	3.09958	2.58591	2.3818
chr6	148747087	149076990	UST	180	+	1766.39	1791.27	1057.96	1463.8	2894.56	2826.19	UST	2054.72	1.01409	0.598939	0.828696	1.63869	1.59998	1.16323
chr1	179954886	180114875	CEP350	139	+	1012.66	1375.29	1309.45	2009.44	2884.06	2266.46	CEP350	2115.53	1.3581	1.29308	1.98432	2.848	2.23813	2.08908
chr11	12377660	12530801	PARVA	127	+	1172.53	1283.35	1524.24	1956.9	2884.06	2130.77	PARVA	1717.49	1.09451	1.29996	1.66896	2.45969	1.81724	1.46477
chr18	9136911	9285985	ANKRD12	150	+	1685.89	1885.46	1383.49	2072.72	2884.06	2783.78	ANKRD12	2412.23	1.11838	0.820629	1.22945	1.7107	1.65122	1.43083
chr7	27740248	27844564	TAX1BP1	152	+	1245.7	1422.01	1416.18	1860.19	2881.43	2463.64	TAX1BP1	1964.42	1.14153	1.13685	1.49329	2.3131	1.97772	1.57696
chr6	87155660	87265943	ZNF292	83	+	1579.51	1718.92	1203.38	2195.69	2881.43	2368.23	ZNF292	2240.84	1.08826	0.761869	1.39011	1.82426	1.49934	1.41869
chrX	9463379	9741037	TBL1X	49	+	776.243	770.915	573.675	1269.18	2865.69	2910.99	TBL1X	2288.76	0.993136	0.73904	1.63503	3.69174	3.7501	2.94851
chr6	147204031	147390476	STXBP5	75	+	2205.45	2069.34	735.104	1751.54	2865.69	2251.62	STXBP5	2126.59	0.938285	0.333312	0.794187	1.29937	1.02093	0.964243
chr16	81444886	81711762	CMIP	75	+	516.182	611.909	516.974	1677.52	2863.07	2499.68	CMIP	1990.22	1.18545	1.00153	3.24986	5.54663	4.84263	3.85566
chr11	11842084	11959323	USP47	77	+	1080.21	1119.07	881.191	1728.86	2857.82	2372.47	USP47	1999.44	1.03597	0.815759	1.60049	2.64562	2.1963	1.85097
chr14	60734857	60969965	MNAT1	43	+	1299.18	1435.57	803.811	1770.64	2857.82	2188.01	MNAT1	1890.71	1.10498	0.618706	1.36289	2.19971	1.68415	1.45531
chr6	26017085	26017689	HIST1H1A	51	-	49.5355	51.9972	12.6742	29.849	41.9881	21.2017	HIST1H1A	22.1136	1.0497	0.255861	0.602578	0.847637	0.42801	0.446419
chr11	108665174	108940927	DDX10	112	+	778.495	971.368	681.739	1848.25	2852.57	2156.21	DDX10	1877.81	1.24775	0.875714	2.37413	3.66421	2.76972	2.4121
chr10	73110576	73131828	NUDT13	33	+	49.5355	61.0402	28.6837	34.6249	41.9881	23.3219	NUDT13	42.3844	1.23225	0.579053	0.698992	0.847637	0.470812	0.855637
chr7	29565048	29567293	PRR15	15	+	24.7677	56.5187	53.3651	59.698	20.9941	23.3219	PRR15	31.3276	2.28195	2.15462	2.41032	0.84764	0.941626	1.26486
chr4	139301593	139420033	NAA15	133	+	858.427	1044.47	1014.6	2047.64	2852.57	2073.53	NAA15	2086.05	1.21673	1.18193	2.38534	3.32302	2.4155	2.43008
chr9	79572031	79726882	TLE4	208	+	1860.96	1987.2	1432.85	2011.82	2852.57	2264.34	TLE4	2137.65	1.06784	0.769952	1.08107	1.53285	1.21676	1.14868
chr1	224929873	225399292	DNAH14	147	+	551.645	915.602	387.564	1085.31	2849.94	2230.42	DNAH14	1931.25	1.65977	0.702561	1.96741	5.16626	4.04322	3.50089
chr12	105107837	105169134	WASHC4	142	+	1140.44	2055.77	1816.41	2352.1	2842.07	2111.69	WASHC4	2213.2	1.80261	1.59273	2.06245	2.49208	1.85164	1.94065
chr3	57756380	57930003	SLMAP	119	+	797.633	889.981	701.084	1768.26	2836.82	2357.63	SLMAP	2078.68	1.11578	0.878956	2.21688	3.55655	2.95578	2.60606
chr8	60517057	60623644	RAB2A	406	+	1670.7	1676.72	1399.5	2164.65	2834.2	2389.43	RAB2A	2430.65	1.0036	0.837673	1.29565	1.69641	1.4302	1.45487
chr20	31514554	31577923	HM13	278	+	1178.72	1433.31	1283.43	2028.54	2828.95	2824.07	HM13	2316.4	1.21599	1.08883	1.72097	2.40002	2.39588	1.96518
chr1	161765525	161964070	ATF6	26	+	685.053	1072.35	980.583	1633.34	2826.33	2726.54	ATF6	2038.14	1.56535	1.4314	2.38425	4.12571	3.98004	2.97516
chr9	137619087	137870016	EHMT1	66	+	817.898	971.368	799.809	1657.22	2826.33	2274.94	EHMT1	2156.08	1.18764	0.977884	2.02619	3.4556	2.78145	2.63612
chr3	63863956	64003453	ATXN7	80	+	1031.24	1721.18	1516.24	2065.55	2826.33	2084.13	ATXN7	2065.78	1.66904	1.47031	2.00298	2.74071	2.02099	2.0032
chr12	19439585	19720801	AEBP2	79	+	1226.57	1664.66	2039.21	2908.49	2826.33	2029	AEBP2	2320.09	1.35717	1.66253	2.37124	2.30425	1.65421	1.89153
chr6	25279484	25620530	CARMIL1	21	+	877.003	1059.54	621.036	1899.59	2818.45	2029	CARMIL1	1805.94	1.20814	0.708134	2.166	3.21373	2.31356	2.05922
chr16	70523895	70577670	SF3B3	196	+	879.817	947.253	868.517	1757.51	2815.83	2082.01	SF3B3	1890.71	1.07665	0.987156	1.99759	3.20047	2.36641	2.14898
chr22	24270955	24417739	SPECC1L	128	+	946.803	1064.06	725.098	1605.88	2800.08	2082.01	SPECC1L	2100.79	1.12385	0.765838	1.69611	2.95741	2.19899	2.21882
chr1	45803699	46036122	MAST2	176	+	642.835	826.68	657.725	1942.57	2797.46	2380.95	MAST2	2117.38	1.28599	1.02316	3.02188	4.35175	3.70383	3.29382
chr4	112818229	113383740	ANK2	49	+	840.414	1362.48	558.999	945.617	2792.21	3040.32	ANK2	2430.65	1.6212	0.665147	1.12518	3.32242	3.61765	2.89221
chr5	160421941	160428739	PTTG1	53	+	42.7806	42.2006	66.7063	71.6377	36.7396	33.9227	PTTG1	58.9696	0.986442	1.55927	1.67454	0.858791	0.792946	1.37842
chr21	15730071	15880069	USP25	202	+	919.783	1137.91	933.222	1344.4	2786.96	2416.99	USP25	1818.84	1.23715	1.01461	1.46165	3.03002	2.62778	1.97747
chr17	2593723	2685615	PAFAH1B1	99	+	1062.76	1125.1	1060.63	2034.51	2786.96	2202.86	PAFAH1B1	2148.7	1.05866	0.997996	1.91436	2.62238	2.07277	2.02181
chr1	96721872	96823738	PTBP2	77	+	1464.67	1432.56	905.205	1874.52	2786.96	2062.92	PTBP2	2294.29	0.978077	0.618027	1.27982	1.90279	1.40845	1.56642
chr7	10973957	11169630	PHF14	298	+	1081.34	1304.45	875.187	1874.52	2784.34	2048.08	PHF14	2508.05	1.20633	0.809354	1.73352	2.5749	1.89402	2.31939
chr17	35809570	35864615	TAF15	555	+	516.745	649.588	639.714	1283.51	2781.71	1986.6	TAF15	1717.49	1.25708	1.23797	2.48384	5.38314	3.84445	3.32367
chr11	43359037	43494933	TTC17	149	+	884.321	1192.17	1099.32	1737.21	2760.72	2132.89	TTC17	1942.31	1.34812	1.24312	1.96446	3.12185	2.4119	2.19639
chr5	116085101	116412762	COMMD10	69	+	704.754	1030.9	1059.96	1700.2	2758.09	2086.25	COMMD10	1483.45	1.46278	1.50401	2.41247	3.91355	2.96025	2.10492
chr4	122826912	122898236	FGF2	297	+	1795.1	3020.36	4811.53	8563.09	2758.09	1776.7	FGF2	1903.61	1.68256	2.68037	4.77026	1.53645	0.98975	1.06045
chr13	93226917	94408020	GPC6	25	+	2239.79	2235.88	779.797	1373.06	2750.22	2444.56	GPC6	1608.76	0.998254	0.348156	0.613031	1.22789	1.09142	0.718264
chr15	68054407	68198603	PIAS1	312	+	1268.78	1524.5	1186.04	1992.72	2739.73	2065.04	PIAS1	2097.11	1.20155	0.934788	1.57058	2.15934	1.62758	1.65286
chr6	125986590	126203817	TRMT11	114	+	632.14	1012.81	781.131	1447.08	2731.85	2143.49	TRMT11	1689.85	1.60219	1.23569	2.28918	4.32159	3.39085	2.67322
chrX	123961849	124422664	STAG2	41	+	1095.41	1428.79	1279.43	2122.86	2729.23	1931.47	STAG2	2320.09	1.30434	1.16799	1.93796	2.49151	1.76324	2.11801
chr1	183022663	183145592	LAMC1	100	+	1696.59	1667.68	1005.26	2020.18	2723.98	1973.88	LAMC1	1665.89	0.98296	0.592518	1.19073	1.60556	1.16344	0.981905
chr7	157337104	157417439	DNAJB6	110	+	735.151	874.909	1142.01	1942.57	2721.36	2728.66	DNAJB6	2047.35	1.19011	1.55344	2.64241	3.70177	3.7117	2.78494
chr10	68721315	68792377	CCAR1	311	+	762.733	815.376	681.072	1611.85	2721.36	2018.4	CCAR1	1842.8	1.06902	0.892936	2.11326	3.56791	2.64627	2.41605
chr18	44679221	45068510	SETBP1	352	+	1833.37	1674.46	625.705	1284.7	2721.36	2253.74	SETBP1	1877.81	0.913324	0.341287	0.700731	1.48435	1.22929	1.02424
chr1	243256139	243500091	SDCCAG8	187	+	896.141	1381.32	672.4	1357.53	2697.74	1946.32	SDCCAG8	1822.53	1.54141	0.750328	1.51486	3.0104	2.17189	2.03375
chr2	24491358	24770702	NCOA1	162	+	1118.49	1543.34	1020.61	1615.43	2697.74	2211.34	NCOA1	1866.76	1.37984	0.912489	1.4443	2.41195	1.97708	1.669
chr2	42169465	42332548	EML4	43	+	821.275	966.092	850.506	1802.88	2689.86	2204.98	EML4	2148.7	1.17633	1.03559	2.19522	3.27522	2.68483	2.6163
chr13	32586659	32778019	PDS5B	74	+	1015.48	1080.64	843.168	1881.68	2684.62	2084.13	PDS5B	2268.49	1.06417	0.830315	1.853	2.6437	2.05236	2.23391
chr18	41955318	42087830	PIK3C3	156	+	1290.17	1597.59	1476.21	2346.13	2679.37	2262.22	PIK3C3	2069.46	1.23828	1.1442	1.81847	2.07676	1.75343	1.60402
chr11	35662929	35818007	TRIM44	104	+	646.775	1088.93	1037.95	1658.41	2676.74	2135.01	TRIM44	1739.6	1.68363	1.60481	2.56412	4.1386	3.30101	2.68965
chr2	44362062	44772592	CAMKMT	90	+	307.908	498.871	650.387	1153.37	2674.12	1588.01	CAMKMT	1374.73	1.62019	2.11228	3.74583	8.6848	5.15742	4.46474
chr19	41425359	41427279	B3GNT8	24	-	9.00645	6.02866	5.33651	5.9698	7.87277	10.6008	B3GNT8	3.6856	0.669371	0.592521	0.662836	0.874126	1.17702	0.409218
chr17	28041840	28196381	NLK	201	+	728.396	970.614	940.559	1644.08	2674.12	2198.62	NLK	2100.79	1.33254	1.29127	2.25712	3.67124	3.01844	2.88413
chr1	154221032	154271510	UBAP2L	136	+	928.79	1001.51	1019.94	1826.76	2674.12	2156.21	UBAP2L	1951.53	1.0783	1.09814	1.96682	2.87914	2.32153	2.10115
chr2	27890843	28338901	BABAM2	110	+	960.875	1410.71	504.3	1087.7	2671.49	1935.71	BABAM2	1693.53	1.46815	0.524834	1.13199	2.78027	2.01453	1.76249
chr1	61742557	62178675	PATJ	67	+	480.156	550.115	266.158	767.717	2666.25	2474.24	PATJ	1219.93	1.1457	0.554316	1.59889	5.55288	5.15299	2.5407
chr12	45216175	45440404	ANO6	254	+	1148.88	1355.69	737.105	1788.55	2658.37	2192.26	ANO6	2183.72	1.18001	0.641586	1.55678	2.31388	1.90817	1.90074
chr4	78057679	78544269	FRAS1	127	+	548.83	610.402	1335.46	1800.49	2650.5	2024.76	FRAS1	1262.32	1.11219	2.43329	3.2806	4.82936	3.68923	2.30002
chr13	27251642	27256691	RPL21	180	+	234.168	297.665	433.591	856.07	2642.63	1785.18	RPL21	1553.48	1.27116	1.85162	3.65579	11.2852	7.6235	6.63404
chr3	180912754	180982753	FXR1	161	+	1061.07	1210.25	1220.73	2069.13	2637.38	2253.74	FXR1	2041.82	1.14059	1.15047	1.95004	2.48559	2.12403	1.9243
chr5	57174156	57264679	GPBP1	91	+	654.093	1535.8	1693.67	2280.47	2634.75	1842.43	GPBP1	1711.96	2.34798	2.58934	3.48646	4.0281	2.81677	2.6173
chr2	32947017	33399509	LTBP1	153	+	714.887	752.075	634.377	1620.2	2632.13	2344.91	LTBP1	1988.38	1.05202	0.887381	2.26637	3.68188	3.28011	2.78139
chr12	64404487	64451125	XPOT	238	+	704.192	784.479	597.689	961.139	2626.88	2347.03	XPOT	2152.39	1.11401	0.848759	1.36488	3.73035	3.33294	3.05654
chr12	42326249	42459715	PPHLN1	95	+	739.654	882.445	849.172	1657.22	2624.26	1778.82	PPHLN1	1614.29	1.19305	1.14807	2.24053	3.54796	2.40494	2.18249
chr7	92246076	92401383	ANKIB1	95	+	941.174	1951.78	1525.57	1878.1	2619.01	1831.83	ANKIB1	1844.64	2.07377	1.62092	1.99549	2.78271	1.94632	1.95994
chr10	19816518	20289856	PLXDC2	29	+	1222.63	1174.83	534.985	1234.56	2613.76	1747.02	PLXDC2	1910.98	0.960904	0.437569	1.00976	2.13782	1.4289	1.56301
chr9	20684364	20995955	FOCAD	146	+	1230.51	1660.9	879.19	1334.85	2605.89	2236.78	FOCAD	1857.54	1.34977	0.714492	1.08479	2.11773	1.81777	1.50957
chr15	41660536	41773081	MGA	171	+	611.313	784.479	685.741	1457.83	2603.26	2168.93	MGA	1652.99	1.28327	1.12175	2.38475	4.25847	3.54799	2.704
chr2	161308550	161411717	PSMD14	257	+	699.688	731.728	853.174	2021.38	2598.02	2062.92	PSMD14	1864.91	1.04579	1.21936	2.88897	3.71311	2.94834	2.66535
chr15	90388356	90502239	IQGAP1	233	+	958.061	1004.53	851.173	1712.14	2592.77	2353.39	IQGAP1	1805.94	1.0485	0.888433	1.78709	2.70627	2.45641	1.88499
chr3	191267168	191329218	UTS2B	30	-	23.6419	30.1433	14.6754	15.5215	20.9941	31.8025	UTS2B	25.7992	1.27499	0.620737	0.656525	0.888004	1.34518	1.09125
chr16	48244397	48363122	LONP2	111	+	992.961	1262.25	975.247	1702.59	2590.14	2088.37	LONP2	1831.74	1.2712	0.98216	1.71466	2.6085	2.10317	1.84473
chr11	34051793	34102610	CAPRIN1	152	+	1101.04	1027.89	825.825	1764.67	2587.52	1770.34	CAPRIN1	2178.19	0.933563	0.750041	1.60273	2.35007	1.60788	1.9783
chr17	39461571	39564907	CDK12	131	+	745.846	944.239	860.512	1739.6	2584.89	1814.86	CDK12	1776.46	1.266	1.15374	2.33238	3.46572	2.43329	2.38181
chr10	62049458	62096944	ARID5B	172	+	3843.5	3522.24	1555.59	2504.93	2584.89	1910.27	ARID5B	1805.94	0.916415	0.404733	0.651731	0.672535	0.497013	0.469869
chr9	470381	746106	KANK1	149	+	793.13	735.496	455.604	1269.18	2579.65	2173.17	KANK1	1474.24	0.927333	0.574438	1.60022	3.25249	2.73999	1.85876
chr2	216498920	216579180	RPL37A	595	+	1005.91	1270.54	971.244	1843.48	2579.65	2031.12	RPL37A	1647.46	1.26308	0.965538	1.83265	2.56449	2.01919	1.63778
chr1	70205794	70253052	SRSF11	256	+	1063.89	1128.87	931.221	1675.13	2579.65	1812.74	SRSF11	1724.86	1.06108	0.875298	1.57453	2.42473	1.70388	1.62128
chr1	203795711	203854999	ZBED6	107	+	788.064	887.72	955.902	1792.14	2571.77	1727.94	ZBED6	1732.23	1.12646	1.21298	2.2741	3.2634	2.19264	2.19808
chr1	203795711	203854999	ZC3H11A	107	+	788.064	887.72	955.902	1792.14	2571.77	1727.94	ZC3H11A	1732.23	1.12646	1.21298	2.2741	3.2634	2.19264	2.19808
chr20	47501982	47656877	NCOA3	322	+	683.364	1158.26	1881.12	2412.99	2569.15	2281.3	NCOA3	1925.73	1.69494	2.75273	3.53105	3.75956	3.33834	2.81801
chr14	96502473	96567111	PAPOLA	99	+	867.433	1005.28	1108.66	1770.64	2566.52	1912.39	PAPOLA	1721.18	1.15891	1.27809	2.04124	2.95875	2.20465	1.98422
chr14	45084204	45116282	PRPF39	52	+	454.826	507.914	579.678	1228.59	2558.65	1967.52	PRPF39	1728.55	1.11672	1.2745	2.70123	5.62556	4.32587	3.80046
chrX	24693999	24996986	POLA1	48	+	490.851	739.264	510.304	1370.67	2558.65	2156.21	POLA1	2084.21	1.50609	1.03963	2.79244	5.21268	4.3928	4.24612
chr9	6413304	6507054	UHRF2	262	+	1039.68	917.863	833.829	1817.21	2556.03	1916.63	UHRF2	2110.01	0.882832	0.802005	1.74786	2.45848	1.84348	2.02948
chr6	57090241	57170305	ZNF451	193	+	1083.03	1185.38	853.841	1665.58	2556.03	1872.11	ZNF451	1923.88	1.0945	0.788382	1.53789	2.36007	1.72859	1.77639
chr15	38252157	38357249	SPRED1	91	+	1184.91	1532.79	979.249	2183.75	2556.03	1649.49	SPRED1	1982.85	1.29359	0.826433	1.84297	2.15715	1.39208	1.67342
chr4	122152449	122362758	KIAA1109	54	+	1235.01	1369.26	877.188	1470.96	2548.15	1971.76	KIAA1109	1890.71	1.1087	0.710268	1.19105	2.06326	1.59655	1.53093
chr12	19129833	19376400	PLEKHA5	42	+	2229.1	1711.39	587.016	1467.38	2548.15	2120.17	PLEKHA5	1584.81	0.767749	0.263342	0.658284	1.14313	0.951133	0.710964
chr22	45502966	45601135	FBLN1	181	+	2955.24	2083.66	835.163	1910.34	2545.53	1850.91	FBLN1	2614.93	0.705073	0.282604	0.646425	0.861362	0.626315	0.884845
chr1	13749506	13825079	PRDM2	423	+	910.214	1138.66	938.558	1626.17	2540.28	2069.29	PRDM2	1811.47	1.25098	1.03114	1.78658	2.79086	2.27341	1.99016
chr12	53452180	53481162	PCBP2	371	+	802.137	939.717	870.518	1801.69	2535.03	1732.18	PCBP2	1734.07	1.17152	1.08525	2.24611	3.16035	2.15946	2.16181
chr7	129611862	129757082	NRF1	182	+	881.506	1121.33	803.144	1444.69	2535.03	1899.67	NRF1	1783.83	1.27206	0.911104	1.63889	2.87579	2.15503	2.02362
chr21	34073658	34106260	SLC5A3	353	+	600.617	673.703	1071.97	3334.73	2529.78	2501.8	SLC5A3	2205.83	1.12168	1.78478	5.55217	4.21197	4.16538	3.67261
chr1	26692670	26782104	ARID1A	182	+	1041.93	1036.93	830.494	1750.35	2529.78	2196.5	ARID1A	2132.12	0.995201	0.797073	1.67991	2.42798	2.10811	2.04632
chr4	26321102	26435131	RBPJ	117	+	1173.09	1302.94	885.86	1774.23	2529.78	1956.92	RBPJ	2030.77	1.11069	0.755151	1.51244	2.15651	1.66818	1.73113
chr4	158769118	158908050	FNIP2	455	+	714.887	913.342	835.163	1577.22	2524.54	1908.15	FNIP2	2110.01	1.2776	1.16824	2.20625	3.53138	2.66916	2.95153
chr8	38997006	39105261	ADAM9	205	+	937.796	868.88	391.566	846.518	2519.29	1855.15	ADAM9	1096.47	0.926513	0.417539	0.902668	2.68639	1.9782	1.1692
chr1	201648750	201826969	NAV1	92	+	1046.44	1330.07	897.2	2071.52	2516.66	1747.02	NAV1	2198.46	1.27104	0.857383	1.97959	2.40497	1.66949	2.10089
chr2	74421830	74425755	WDR54	75	+	46.158	34.6648	12.6742	32.2369	41.9881	21.2017	WDR54	42.3844	0.751003	0.274583	0.698403	0.90966	0.459329	0.918246
chr3	122680240	122730840	PARP14	61	+	436.813	3696.32	2736.29	2526.42	2514.04	1454.44	PARP14	1524	8.46202	6.26421	5.78376	5.75541	3.32966	3.48891
chr2	230712950	230821075	CAB39	161	+	902.896	1032.41	807.147	1798.11	2511.41	2088.37	CAB39	1981.01	1.14344	0.893953	1.99149	2.78151	2.31297	2.19406
chr6	42564104	42693504	UBR2	179	+	1195.61	1492.85	1230.06	1919.89	2508.79	2101.09	UBR2	1993.91	1.24861	1.02881	1.60578	2.09833	1.75734	1.66769
chr2	113890195	113962596	ACTR3	134	+	692.371	913.342	941.894	1706.17	2500.92	2096.85	ACTR3	1918.35	1.31915	1.36039	2.46424	3.61211	3.02851	2.7707
chr10	73998194	74121363	VCL	866	+	904.022	1072.35	827.159	1757.51	2500.92	1727.94	VCL	1969.95	1.1862	0.914977	1.9441	2.76644	1.91139	2.1791
chr14	30622400	30735812	SCFD1	324	+	1105.54	1330.07	1137.34	1719.3	2500.92	1914.51	SCFD1	1664.05	1.2031	1.02876	1.55517	2.26217	1.73174	1.50519
chr2	237692395	237813682	LRRFIP1	81	+	683.927	894.502	693.079	1783.78	2495.67	2448.8	LRRFIP1	1573.75	1.30789	1.01338	2.60814	3.64903	3.5805	2.30105
chr7	148698980	148801110	CUL1	123	+	854.487	954.789	887.194	1905.56	2495.67	2158.33	CUL1	2012.34	1.11738	1.03828	2.23006	2.92066	2.52588	2.35503
chr2	173075957	173268015	MAP3K20	97	+	1224.88	1204.22	498.963	1479.32	2495.67	1961.16	MAP3K20	1853.86	0.983133	0.407357	1.20773	2.03748	1.6011	1.5135
chr10	119207031	119459742	GRK5	42	+	647.338	768.654	1093.98	2559.85	2490.42	1649.49	GRK5	1817	1.18741	1.68997	3.95443	3.84717	2.54811	2.80688
chr2	9206894	9405683	ASAP2	285	+	580.916	674.456	404.908	1398.13	2479.92	2508.16	ASAP2	2104.48	1.16102	0.697016	2.40677	4.26898	4.31759	3.62269
chr3	31532227	31637622	STT3B	239	+	973.259	1117.56	1174.7	1691.84	2477.3	2016.28	STT3B	2034.45	1.14827	1.20698	1.73832	2.54537	2.07168	2.09035
chr9	21802737	21937651	MTAP	234	+	994.65	1151.47	791.804	1807.66	2474.67	1916.63	MTAP	2004.97	1.15766	0.796063	1.81738	2.48798	1.92694	2.01575
chr2	97113624	97264434	ANKRD36	100	+	1066.14	1102.49	538.987	1638.11	2474.67	1901.79	ANKRD36	2589.13	1.03409	0.50555	1.53649	2.32115	1.78381	2.42851
chr1	230067318	230282122	GALNT2	182	+	1203.49	1515.45	864.514	1592.74	2474.67	2132.89	GALNT2	1617.98	1.25921	0.718339	1.32343	2.05624	1.77225	1.34441
chr3	182793599	182921629	ATP11B	206	+	821.275	974.382	841.834	1388.58	2466.8	2433.95	ATP11B	1627.19	1.18643	1.02503	1.69076	3.00362	2.96362	1.9813
chr9	19230843	19373545	DENND4C	98	+	963.69	1191.41	1100.65	2002.27	2464.18	1751.26	DENND4C	1951.53	1.2363	1.14212	2.07771	2.55703	1.81724	2.02506
chr13	46553283	46753040	LRCH1	91	+	1095.97	1571.97	1474.88	2090.63	2464.18	2092.61	LRCH1	2329.3	1.43432	1.34573	1.90756	2.2484	1.90937	2.12533
chr10	91923878	92030325	BTAF1	329	+	781.309	1008.29	912.543	1617.82	2461.55	2001.44	BTAF1	1794.89	1.29051	1.16797	2.07065	3.15055	2.56165	2.29729
chr2	156436487	156613735	GPD2	195	+	793.693	1388.1	1769.05	2607.61	2456.31	1634.65	GPD2	1888.87	1.74891	2.22888	3.28541	3.09479	2.05955	2.37985
chr11	118436570	118526832	KMT2A	91	+	895.016	872.648	779.13	1658.41	2453.68	2069.29	KMT2A	1874.13	0.975008	0.870521	1.85294	2.74149	2.31201	2.09396
chr9	5629196	5776557	RIC1	362	+	1330.14	1329.32	868.517	1689.45	2453.68	1704.62	RIC1	1925.73	0.999384	0.652952	1.27013	1.84468	1.28153	1.44776
chr8	42897057	43030535	HOOK3	111	+	1168.02	1207.99	933.889	1857.8	2448.43	1995.08	HOOK3	1979.17	1.03422	0.799549	1.59055	2.09622	1.70809	1.69447
chr16	10944647	11182186	CLEC16A	78	+	829.719	1141.68	744.443	1574.83	2445.81	1814.86	CLEC16A	1793.04	1.37598	0.897223	1.89803	2.94776	2.18732	2.16102
chr13	42040674	42256578	DGKH	28	+	1317.76	1608.9	1032.61	1776.61	2445.81	1655.85	DGKH	1654.83	1.22094	0.78361	1.3482	1.85604	1.25656	1.25579
chr9	100099362	100302175	INVS	90	+	494.792	614.923	380.226	1146.2	2443.18	1730.06	INVS	1518.47	1.24279	0.768456	2.31653	4.93779	3.49654	3.06891
chr9	93451779	93566112	FAM120A	153	+	924.287	886.213	691.078	1507.97	2443.18	2154.09	FAM120A	1767.25	0.958807	0.747688	1.6315	2.64331	2.33054	1.91201
chr2	202376379	202567751	BMPR2	116	+	1032.36	1640.55	1276.09	1752.73	2437.94	1791.54	BMPR2	1662.21	1.58913	1.23609	1.69779	2.36152	1.73538	1.61011
chr9	36191024	36304781	CLTA	267	+	962.564	1104.75	878.523	1699.01	2435.31	1808.5	CLTA	1944.15	1.14772	0.91269	1.76509	2.53002	1.87884	2.01976
chr19	38384265	38387911	GGN	21	-	11.2581	11.3037	4.00238	16.7155	10.497	14.8412	GGN	27.642	1.00405	0.355511	1.48475	0.932395	1.31827	2.4553
chr11	85855209	85920021	CCDC83	33	+	16.8871	24.1146	12.6742	17.9094	15.7455	14.8412	CCDC83	27.642	1.42799	0.750526	1.06054	0.932398	0.878848	1.63687
chr5	60945262	61153026	NDUFAF2	209	+	570.784	694.049	523.645	1145.01	2424.81	2175.29	NDUFAF2	1702.75	1.21596	0.917414	2.00603	4.24821	3.81106	2.98318
chr13	99200958	99386434	UBAC2	181	+	717.138	985.686	656.39	1533.05	2424.81	2128.65	UBAC2	1885.18	1.37447	0.915291	2.13773	3.38123	2.96826	2.62875
chr16	67431197	67437553	HSD11B2	50	+	5.62903	12.8109	7.3377	16.7155	5.24852	6.36051	HSD11B2	11.0568	2.27586	1.30355	2.96952	0.932402	1.12995	1.96425
chr16	15949706	16143074	ABCC1	53	+	1200.11	1601.36	1146.68	2331.81	2422.19	1821.23	ABCC1	1743.29	1.33434	0.955479	1.943	2.01831	1.51755	1.45261
chr15	40872214	40874153	RHOV	51	-	2.81451	1.50716	2.66825	5.9698	2.62426	0	RHOV	1.8428	0.535496	0.948034	2.12108	0.932404	0	0.65475
chr1	1917590	1919196	TMEM52	42	-	2.81451	1.50716	2.66825	2.38792	2.62426	0	TMEM52	0	0.535496	0.948034	0.848432	0.932404	0	0
chr12	57128061	57213351	LRP1	103	+	1658.31	1681.24	1280.09	2342.55	2422.19	1609.21	LRP1	1840.96	1.01383	0.771924	1.41261	1.46064	0.970392	1.11014
chr14	75661337	75955079	TTLL5	58	+	694.622	933.688	553.663	1500.81	2419.57	1431.11	TTLL5	1625.35	1.34417	0.797071	2.16061	3.48329	2.06027	2.33991
chr12	4273869	4305353	CCND2	636	+	395.721	416.731	379.559	729.51	2416.94	2635.37	CCND2	972.998	1.05309	0.959158	1.8435	6.10769	6.65967	2.4588
chr14	103334314	103345025	EIF5	1404	+	594.426	615.677	695.747	1252.46	2414.32	1920.87	EIF5	1597.71	1.03575	1.17045	2.10701	4.0616	3.23147	2.68782
chr17	38428543	38512385	ARHGAP23	56	+	843.229	802.565	670.399	1601.1	2411.69	1859.39	ARHGAP23	1850.17	0.951776	0.795038	1.89877	2.86007	2.20508	2.19415
chr6	170306854	170407065	FAM120B	70	+	875.877	1048.23	752.448	1442.3	2409.07	2037.48	FAM120B	1802.26	1.19678	0.85908	1.64669	2.75047	2.32622	2.05766
chr17	12020929	12143830	MAP2K4	157	+	803.825	985.686	875.187	1578.42	2403.82	2073.53	MAP2K4	1809.63	1.22624	1.08878	1.96364	2.99048	2.57958	2.25127
chr4	78776437	78916372	BMP2K	92	+	1255.27	1091.19	733.103	1676.32	2398.57	2149.85	BMP2K	1811.47	0.869287	0.58402	1.33543	1.9108	1.71266	1.44309
chr12	11649782	11895402	ETV6	89	+	1006.47	1700.08	1043.95	1422.01	2388.07	1615.57	ETV6	1656.68	1.68915	1.03724	1.41287	2.37272	1.60518	1.64603
chr12	68808282	68850686	MDM2	87	+	1296.93	2705.36	1180.04	1476.93	2388.07	1621.93	MDM2	1791.2	2.08597	0.909872	1.13879	1.84133	1.25059	1.38111
chr5	179820985	179838078	SQSTM1	657	+	1476.49	1256.98	803.811	1694.23	2382.83	2300.38	SQSTM1	2388.27	0.85133	0.544407	1.14747	1.61385	1.55801	1.61753
chr9	33817236	33920399	UBE2R2	106	+	914.717	1061.04	708.421	1737.21	2377.58	1914.51	UBE2R2	1888.87	1.15997	0.77447	1.89918	2.59925	2.09301	2.06498
chr5	79612540	79686648	TENT2	96	+	703.629	853.809	956.569	1640.5	2374.95	1636.77	TENT2	1586.65	1.21344	1.35948	2.33148	3.37529	2.32618	2.25495
chr11	57712678	57791586	TMX2-CTNND1	194	+	1022.23	1360.97	1084.65	1793.33	2374.95	1899.67	TMX2-CTNND1	2025.24	1.33137	1.06106	1.75433	2.3233	1.85836	1.9812
chr10	101354231	101557321	BTRC	135	+	844.354	1036.93	645.05	1525.88	2372.33	1978.12	BTRC	1844.64	1.22807	0.763957	1.80716	2.80964	2.34276	2.18468
chr7	139341429	139423457	LUC7L2	87	+	1067.26	1090.43	833.162	1531.85	2372.33	1636.77	LUC7L2	1936.78	1.02171	0.780655	1.43531	2.22282	1.53362	1.81472
chr5	87267972	87391931	RASA1	81	+	1216.43	1454.41	873.186	1629.76	2372.33	2079.89	RASA1	2207.67	1.19564	0.717827	1.33979	1.95024	1.70983	1.81488
chr6	149317655	149411613	TAB2	67	+	1044.18	1066.32	938.558	1593.94	2364.46	1895.43	TAB2	1763.56	1.0212	0.898847	1.5265	2.26442	1.81523	1.68894
chr7	77537199	77640069	PTPN12	64	+	1065.01	1127.36	762.453	1764.67	2364.46	2054.44	PTPN12	2019.71	1.05854	0.715912	1.65695	2.22013	1.92903	1.89642
chr2	53971200	54305300	ACYP2	147	+	719.39	1177.1	797.808	1352.76	2361.83	1747.02	ACYP2	1735.92	1.63625	1.10901	1.88043	3.2831	2.42847	2.41304
chr5	71455737	71567820	BDP1	119	+	705.317	805.579	631.709	1482.9	2356.58	1738.54	BDP1	1743.29	1.14215	0.895638	2.10246	3.34116	2.46491	2.47164
chr5	134758863	134855133	DDX46	169	+	1031.8	1145.45	935.89	1946.16	2356.58	1755.5	DDX46	1868.6	1.11015	0.907046	1.88618	2.28395	1.7014	1.81101
chr20	2873587	3039076	PTPRA	423	+	703.629	1293.9	1087.98	1457.83	2338.21	1573.17	PTPRA	1723.02	1.8389	1.54624	2.07187	3.32307	2.23579	2.44876
chr5	96702913	96779595	CAST	208	+	813.395	993.975	886.527	2026.15	2332.97	2168.93	CAST	1544.27	1.22201	1.08991	2.49098	2.86819	2.66652	1.89855
chr19	37907336	38208369	SIPA1L3	89	+	508.864	742.279	749.779	1859	2330.34	1842.43	SIPA1L3	1649.31	1.4587	1.47344	3.65324	4.57949	3.62067	3.24116
chr3	183697899	183812624	YEATS2	90	+	909.651	1391.87	1012.6	1935.41	2330.34	1375.99	YEATS2	1516.62	1.53011	1.11317	2.12764	2.5618	1.51266	1.66725
chr1	121185093	121392822	SRGAP2C	106	+	829.719	1403.17	1010.6	1572.45	2327.72	1670.69	SRGAP2C	2130.28	1.69114	1.218	1.89516	2.80543	2.01356	2.56747
chr4	94452009	94668227	PDLIM5	164	+	683.364	737.003	748.445	1714.53	2325.09	1641.01	PDLIM5	1597.71	1.07849	1.09524	2.50896	3.40242	2.40137	2.33801
chr4	98261525	98443861	RAP1GDS1	88	+	852.798	924.645	604.359	1422.01	2325.09	2052.32	RAP1GDS1	1791.2	1.08425	0.708678	1.66746	2.72643	2.40657	2.10038
chr11	83157222	83187451	PCF11	895	+	1161.83	1266.77	1023.94	1598.71	2322.47	1806.38	PCF11	1971.8	1.09032	0.881317	1.37603	1.99898	1.55477	1.69715
chr3	149812821	149962139	RNF13	233	+	831.971	1016.58	1007.93	1743.18	2317.22	1884.83	RNF13	1791.2	1.22189	1.2115	2.09524	2.78522	2.2655	2.15296
chr4	55396035	55453397	TMEM165	438	+	1148.88	1374.53	1197.38	1913.92	2314.6	2224.06	TMEM165	1852.01	1.19641	1.04222	1.6659	2.01466	1.93585	1.61201
chr10	15075475	15088698	ACBD7	30	-	43.9064	76.1118	27.3496	31.043	41.9881	25.442	ACBD7	51.5984	1.7335	0.622907	0.707027	0.956309	0.57946	1.17519
chr21	37073370	37203112	TTC3	90	+	1556.99	1420.5	641.048	1500.81	2311.97	2079.89	TTC3	2062.09	0.912337	0.411723	0.963918	1.4849	1.33584	1.32441
chr2	237967111	238099412	UBE2F-SCLY	144	+	757.667	1160.52	1001.93	1614.24	2306.72	1912.39	UBE2F-SCLY	1813.32	1.5317	1.32239	2.13054	3.0445	2.52405	2.39329
chr7	139341429	139422599	FMC1-LUC7L2	87	+	1060.51	1079.13	821.155	1512.75	2306.72	1609.21	FMC1-LUC7L2	1916.51	1.01756	0.774302	1.42644	2.1751	1.51739	1.80716
chr2	168456352	168775137	CERS6	136	+	615.816	727.207	641.715	1299.03	2304.1	2088.37	CERS6	1848.33	1.18088	1.04206	2.10945	3.74154	3.39122	3.00143
chr7	35801290	35907105	SEPT7	136	+	1078.52	1040.7	759.785	1685.87	2304.1	1774.58	SEPT7	1857.54	0.964933	0.70447	1.56313	2.13635	1.64538	1.7223
chr4	109433925	109540896	SEC24B	121	+	1130.87	1165.04	973.246	1786.17	2304.1	1827.59	SEC24B	1804.1	1.03022	0.860617	1.57947	2.03746	1.61609	1.59532
chr5	10353979	10440388	MARCH6	41	+	1235.01	1155.24	807.147	1633.34	2304.1	1793.66	MARCH6	1872.28	0.935409	0.653555	1.32253	1.86565	1.45234	1.516
chr17	48724763	48728648	HOXB13	26	-	16.3242	13.5645	3.33532	22.6853	15.7455	14.8412	HOXB13	12.8996	0.830944	0.204318	1.38967	0.96455	0.909153	0.790213
chr17	68512530	68551319	PRKAR1A	157	+	987.332	1034.67	846.503	1519.91	2298.85	1660.09	PRKAR1A	1875.97	1.04795	0.857364	1.53941	2.32835	1.68139	1.90004
chr11	810049	812880	RPLP2	191	+	139.037	201.206	332.865	494.3	2290.98	1842.43	RPLP2	622.866	1.44714	2.39407	3.55517	16.4775	13.2514	4.47986
chr5	109689499	109869625	MAN2A1	54	+	919.221	1117.56	819.821	1484.09	2288.35	2065.04	MAN2A1	1846.49	1.21577	0.891865	1.61451	2.48944	2.24651	2.00876
chr5	55308077	55425579	MTREX	132	+	713.761	856.069	791.804	1661.99	2283.1	1619.81	MTREX	1673.26	1.19938	1.10934	2.3285	3.19869	2.2694	2.34429
chr9	70259068	70354873	SMC5	192	+	788.627	927.66	835.163	1693.04	2283.1	1797.9	SMC5	1662.21	1.1763	1.05901	2.14682	2.89503	2.27978	2.10773
chr2	158457016	158682879	PKP4	63	+	893.89	944.992	540.988	1410.07	2283.1	2124.41	PKP4	1901.77	1.05717	0.605206	1.57745	2.55412	2.37659	2.12752
chr19	4969190	5153598	KDM4B	612	+	749.224	853.055	757.117	1677.52	2277.86	1927.23	KDM4B	1726.7	1.13858	1.01053	2.23901	3.04029	2.5723	2.30465
chr8	96645447	97149654	CPQ	105	+	841.54	1153.73	684.407	1155.75	2277.86	1954.8	CPQ	1826.21	1.37097	0.813279	1.37338	2.70678	2.32288	2.17008
chrX	17375306	17735994	NHS	71	+	1013.23	981.164	330.196	865.622	2277.86	1488.36	NHS	1061.45	0.968353	0.325885	0.854319	2.24812	1.46893	1.04759
chr5	139293808	139331677	MATR3	275	+	759.356	825.173	745.777	1419.62	2267.36	1554.08	MATR3	1697.22	1.08667	0.982118	1.86951	2.9859	2.04658	2.23508
chr5	179699057	179731641	CANX	407	+	576.976	584.78	633.71	1197.54	2264.73	1831.83	CANX	1221.78	1.01353	1.09833	2.07555	3.92517	3.17488	2.11756
chr1	36224539	36305357	THRAP3	132	+	852.798	963.078	791.804	1716.92	2262.11	1670.69	THRAP3	1594.02	1.12932	0.928478	2.01328	2.65257	1.95907	1.86916
chr2	84971239	85059472	KCMF1	119	+	1003.66	955.542	872.519	1737.21	2262.11	1954.8	KCMF1	1844.64	0.952057	0.869337	1.73087	2.25386	1.94767	1.83791
chr10	132537894	132783480	INPP5A	304	+	569.095	706.107	362.215	1305	2259.49	1689.77	INPP5A	1610.61	1.24075	0.636475	2.29311	3.97032	2.96922	2.83013
chr5	119071492	119249138	DMXL1	116	+	910.777	1113.04	723.097	1405.29	2259.49	1967.52	DMXL1	1883.34	1.22208	0.793934	1.54296	2.48084	2.16027	2.06784
chr13	72782213	73016461	PIBF1	131	+	1021.11	1235.87	839.166	1448.27	2259.49	1965.4	PIBF1	2034.45	1.21032	0.821817	1.41833	2.21278	1.92477	1.99239
chr22	18906422	18914238	DGCR6	66	+	10.6952	7.53582	4.00238	9.55169	10.497	21.2017	DGCR6	9.214	0.704598	0.374222	0.893082	0.981468	1.98236	0.861508
chr12	32106951	32383633	BICD1	154	+	1670.13	1911.08	682.406	1539.02	2259.49	2077.77	BICD1	1818.84	1.14427	0.408595	0.921497	1.35288	1.24408	1.08904
chr8	116938282	116944487	AARD	21	+	21.3903	18.8396	9.33889	25.0732	20.9941	23.3219	AARD	31.3276	0.880754	0.436595	1.17218	0.981478	1.0903	1.46457
chr1	117366945	117528872	MAN1A2	113	+	1016.6	1039.94	863.847	1455.44	2256.86	1988.72	MAN1A2	1664.05	1.02296	0.849741	1.43167	2.22001	1.95625	1.63688
chr2	177392847	177559299	AGPS	52	+	521.248	715.903	430.256	1285.9	2254.24	2007.8	AGPS	1560.85	1.37344	0.825434	2.46696	4.3247	3.85191	2.99445
chr2	26034192	26137454	RAB10	77	+	768.925	886.966	857.177	1559.31	2251.61	1706.74	RAB10	1680.63	1.15351	1.11477	2.02791	2.92826	2.21964	2.18569
chr7	32495593	32588726	AVL9	170	+	800.448	959.31	678.404	1456.63	2251.61	1863.63	AVL9	1794.89	1.19847	0.84753	1.81977	2.81294	2.32823	2.24236
chr2	222861112	222944639	ACSL3	533	+	826.904	1030.9	1214.06	1954.51	2251.61	1700.38	ACSL3	2321.93	1.2467	1.4682	2.36365	2.72294	2.05632	2.80798
chr15	58987755	59097419	RNF111	112	+	963.127	1092.69	1005.93	1773.03	2248.99	1651.61	RNF111	1759.87	1.13452	1.04444	1.84091	2.33509	1.71484	1.82725
chr20	48921821	49036693	ARFGEF2	212	+	665.914	784.479	632.376	1393.35	2246.36	1562.56	ARFGEF2	1507.41	1.17805	0.949636	2.09239	3.37335	2.34649	2.26367
chr11	44095777	44251981	EXT2	207	+	594.426	823.665	753.782	1401.71	2243.74	1937.83	EXT2	1619.82	1.38565	1.26808	2.35809	3.77463	3.26	2.72502
chr2	158968735	159232659	TANC1	129	+	713.198	1024.87	507.635	1161.72	2243.74	1867.87	TANC1	1783.83	1.43701	0.711773	1.62889	3.14603	2.61901	2.50117
chrX	71533184	71575892	OGT	227	+	440.19	397.891	395.569	975.466	2241.12	1954.8	OGT	1424.48	0.903907	0.898632	2.21601	5.09126	4.44081	3.23606
chr1	86914769	87109982	HS2ST1	38	+	764.422	866.62	438.928	1336.04	2241.12	1768.22	HS2ST1	2021.55	1.13369	0.574196	1.74778	2.93178	2.31315	2.64455
chr21	33642612	33899861	ITSN1	82	+	1116.24	965.339	563.669	1445.89	2238.49	1785.18	ITSN1	1557.17	0.864813	0.504971	1.29532	2.00538	1.59928	1.39501
chr7	33129652	33606068	BBS9	67	+	739.092	838.737	448.934	1092.47	2233.24	1725.82	BBS9	1457.65	1.13482	0.607413	1.47812	3.0216	2.33505	1.97222
chr11	87038006	87328824	TMEM135	99	+	804.388	942.731	909.875	1568.86	2227.99	1615.57	TMEM135	2091.58	1.17199	1.13114	1.95038	2.7698	2.00845	2.60021
chr15	67542813	67807117	MAP2K5	88	+	794.819	1048.23	524.979	1217.84	2214.87	1778.82	MAP2K5	1691.69	1.31883	0.660501	1.53222	2.78663	2.23802	2.1284
chr7	94394976	94431232	COL1A2	240	+	12330.4	6868.9	1889.12	2627.91	2212.25	1356.91	COL1A2	1944.15	0.55707	0.153208	0.213124	0.179414	0.110046	0.157671
chr4	39698215	39782792	UBE2K	141	+	625.948	673.703	641.048	1454.24	2209.62	1704.62	UBE2K	1476.08	1.07629	1.02412	2.32326	3.53004	2.72326	2.35815
chr3	72996901	73069199	PPP4R2	51	+	817.898	898.27	908.54	1546.18	2209.62	1556.2	PPP4R2	1734.07	1.09827	1.11082	1.89043	2.70158	1.90268	2.12015
chr7	87152669	87196337	DMTF1	111	+	1061.07	1204.22	1192.04	1441.11	2209.62	1655.85	DMTF1	1669.58	1.13491	1.12343	1.35817	2.08245	1.56055	1.57349
chr16	47461433	47701523	PHKB	125	+	622.571	725.7	410.911	1110.38	2207	1988.72	PHKB	1560.85	1.16565	0.660023	1.78354	3.54498	3.19437	2.5071
chr17	32350999	32381886	ZNF207	29	+	676.609	838.737	924.55	1679.9	2207	1566.81	ZNF207	1654.83	1.23962	1.36645	2.48282	3.26185	2.31568	2.44577
chr15	49170346	49367869	GALK2	226	+	1023.36	1275.81	587.683	1254.85	2207	1645.25	GALK2	1562.69	1.24669	0.574268	1.22621	2.15662	1.60769	1.52702
chr14	101809941	101927989	PPP2R5C	82	+	834.785	1064.81	728.433	1613.04	2204.38	1477.76	PPP2R5C	1621.66	1.27555	0.8726	1.93228	2.64066	1.77023	1.94261
chr3	141487139	141615342	RASA2	130	+	2468.89	1928.42	1228.73	1644.08	2204.38	1965.4	RASA2	1520.31	0.781088	0.497685	0.665919	0.892863	0.796066	0.615787
chr3	50675019	51384198	DOCK3	24	+	149.732	209.496	342.871	973.078	2201.75	3527.96	DOCK3	1549.79	1.39914	2.2899	6.4988	14.7046	23.5618	10.3504
chr14	63853078	64226433	SYNE2	105	+	354.629	566.694	609.029	1419.62	2199.13	1914.51	SYNE2	1883.34	1.59799	1.71737	4.00311	6.20121	5.39863	5.31073
chr2	135531564	135725270	R3HDM1	79	+	683.927	832.708	404.908	1277.54	2199.13	1439.59	R3HDM1	1621.66	1.21754	0.592034	1.86795	3.21545	2.10489	2.3711
chr10	89328080	89340971	IFIT3	307	+	128.905	8714.43	5356.52	3944.85	2193.88	1043.12	IFIT3	1700.9	67.6035	41.554	30.6028	17.0194	8.09216	13.195
chr3	42013737	42225890	TRAK1	174	+	672.669	756.597	363.55	1104.41	2191.26	1814.86	TRAK1	1413.43	1.12477	0.540459	1.64183	3.25756	2.698	2.10123
chr4	87007334	87141054	AFF1	201	+	703.066	1494.35	1175.37	1436.33	2191.26	1645.25	AFF1	1426.33	2.12548	1.67178	2.04295	3.11672	2.34011	2.02873
chr18	23689569	23956222	LAMA3	154	+	1308.19	1308.97	505.634	1377.83	2191.26	1590.13	LAMA3	1649.31	1.0006	0.386514	1.05323	1.67503	1.21552	1.26076
chr11	33257465	33357023	HIPK3	234	+	1218.68	1519.98	1042.62	1624.98	2188.63	1751.26	HIPK3	1711.96	1.24723	0.855532	1.33339	1.7959	1.43701	1.40477
chr20	21303425	21389825	XRN2	209	+	864.619	993.221	897.2	1642.89	2186.01	1787.3	XRN2	1719.33	1.14874	1.03768	1.90013	2.52829	2.06715	1.98854
chr11	108223159	108369102	ATM	105	+	919.783	1254.71	795.807	1367.09	2183.38	1577.41	ATM	1780.14	1.36414	0.865212	1.48632	2.3738	1.71498	1.93539
chr3	150408392	150466431	TSC22D2	601	+	1070.08	1149.21	827.159	1404.1	2180.76	1976	TSC22D2	1877.81	1.07395	0.772988	1.31214	2.03794	1.84659	1.75483
chr6	36594446	36605600	SRSF3	235	+	888.824	850.794	770.458	1511.55	2178.13	1698.26	SRSF3	1890.71	0.957213	0.866829	1.70062	2.45058	1.91068	2.1272
chr2	100820233	100996829	NPAS2	198	+	583.167	680.485	488.957	1358.73	2175.51	2427.59	NPAS2	1555.32	1.16688	0.838451	2.32992	3.73051	4.16277	2.66702
chr5	120464381	120687332	PRR16	94	+	837.6	975.889	442.93	725.928	2175.51	1848.79	PRR16	1474.24	1.1651	0.528809	0.866676	2.59731	2.20725	1.76008
chr13	102597073	102679958	TPP2	197	+	895.016	775.436	736.438	1447.08	2172.89	1844.55	TPP2	1710.12	0.866393	0.822821	1.61682	2.42777	2.06091	1.91071
chr17	77373427	77500596	SEPT9	142	+	1304.81	1203.47	585.682	1796.91	2172.89	1789.42	SEPT9	2473.04	0.922334	0.448864	1.37714	1.66529	1.3714	1.89533
chr10	122113069	122254545	TACC2	92	+	337.179	409.195	266.825	1241.72	2170.26	1980.24	TACC2	1525.84	1.21358	0.791345	3.68267	6.43652	5.87296	4.52531
chr7	44606691	44709066	OGDH	154	+	595.551	694.049	593.019	1373.06	2167.64	1755.5	OGDH	1516.62	1.16539	0.995748	2.30553	3.63972	2.94769	2.54658
chr14	74763436	74859435	YLPM1	237	+	764.985	956.296	763.121	1401.71	2167.64	1657.97	YLPM1	1605.08	1.25008	0.997563	1.83234	2.83357	2.16732	2.09818
chr17	30116908	30186475	NSRP1	357	+	786.938	1039.94	788.469	1343.21	2167.64	1503.2	NSRP1	1459.5	1.3215	1.00195	1.70688	2.75452	1.91019	1.85466
chrX	41334243	41364472	DDX3X	377	+	641.146	1018.84	979.916	1714.53	2165.01	1641.01	DDX3X	1616.14	1.58909	1.52838	2.67416	3.37678	2.5595	2.52071
chr10	115093467	115948999	ATRNL1	46	+	229.101	342.126	387.564	850.1	2154.52	1231.82	ATRNL1	1118.58	1.49334	1.69167	3.71059	9.40424	5.37676	4.88248
chr9	95875772	96121154	ERCC6L2	195	+	986.206	1296.16	942.561	1610.65	2154.52	1513.8	ERCC6L2	1711.96	1.31429	0.955745	1.63318	2.18466	1.53497	1.73591
chr17	67377397	67697261	PITPNC1	58	+	338.868	440.092	524.312	1370.67	2151.89	1399.31	PITPNC1	1369.2	1.29871	1.54725	4.04485	6.35023	4.12937	4.04051
chr1	236795389	236921278	MTR	382	+	729.522	932.935	663.728	1336.04	2151.89	1827.59	MTR	1665.89	1.27883	0.909812	1.83139	2.94973	2.50519	2.28354
chr15	84980788	85139145	PDE8A	74	+	409.23	472.496	510.304	1116.35	2149.27	1903.91	PDE8A	1378.41	1.1546	1.24699	2.72793	5.25199	4.65242	3.3683
chr20	38472925	38578859	RALGAPB	211	+	753.727	893.749	718.427	1414.84	2149.27	1800.02	RALGAPB	1551.64	1.18577	0.953166	1.87713	2.85152	2.38816	2.05862
chr12	62466905	62600476	MON2	151	+	945.677	987.193	865.181	1379.02	2149.27	1848.79	MON2	1483.45	1.0439	0.91488	1.45824	2.27273	1.95499	1.56866
chr6	157381276	157678157	ZDHHC14	128	+	640.584	1035.42	1094.65	1381.41	2144.02	1501.08	ZDHHC14	1494.51	1.61637	1.70883	2.15649	3.34698	2.3433	2.33304
chr1	66925063	66988619	MIER1	100	+	1137.63	1388.85	1083.31	1714.53	2144.02	1611.33	MIER1	1839.11	1.22083	0.952252	1.50711	1.88464	1.41639	1.61662
chr2	3379798	3485094	TRAPPC12	284	+	758.23	911.835	644.383	1190.38	2141.39	1867.87	TRAPPC12	1385.79	1.20258	0.849852	1.56995	2.8242	2.46346	1.82766
chr3	130894134	131016712	ATP2C1	155	+	924.287	888.474	783.132	1448.27	2141.39	2041.72	ATP2C1	1746.97	0.961253	0.847282	1.56691	2.3168	2.20897	1.89007
chr5	173888421	173961980	CPEB4	712	+	835.348	822.158	643.716	1466.18	2136.15	2135.01	CPEB4	1778.3	0.98421	0.770596	1.75517	2.5572	2.55583	2.12881
chr3	23806081	23891316	UBE2E1	130	+	542.076	655.617	720.429	1389.77	2130.9	1823.35	UBE2E1	1420.8	1.20946	1.32902	2.56379	3.931	3.36364	2.62103
chr11	111299380	111308735	COLCA2	25	+	23.079	13.5645	4.66944	20.2973	23.6183	33.9227	COLCA2	23.9564	0.587742	0.202324	0.879471	1.02337	1.46985	1.03802
chr1	89821105	89936611	LRRC8D	122	+	564.029	473.25	243.478	1068.59	2130.9	1952.68	LRRC8D	1559.01	0.839053	0.431676	1.89457	3.778	3.46202	2.76406
chr14	76152010	76254342	GPATCH2L	227	+	701.377	913.342	939.892	1596.33	2130.9	1689.77	GPATCH2L	1501.88	1.30221	1.34007	2.27599	3.03817	2.40922	2.14133
chr22	29883258	30030866	MTMR3	93	+	851.672	911.081	627.707	1145.01	2130.9	1789.42	MTMR3	1431.86	1.06976	0.737029	1.34443	2.50202	2.10107	1.68123
chr20	37694157	37872129	CTNNBL1	99	+	508.301	1030.9	1259.42	1919.89	2128.27	1585.89	CTNNBL1	1455.81	2.02813	2.47771	3.77707	4.18703	3.11998	2.86407
chr14	32077143	32159728	ARHGAP5	155	+	947.366	905.806	662.394	1324.1	2123.02	1626.17	ARHGAP5	1404.21	0.956131	0.699195	1.39766	2.24097	1.71652	1.48223
chr14	60092064	60169133	PCNX4	197	+	1089.78	1193.67	680.405	1402.9	2117.78	1475.64	PCNX4	1669.58	1.09533	0.624351	1.28732	1.94331	1.35407	1.53203
chr12	69470476	69579789	FRS2	259	+	1296.93	1184.63	821.155	1426.78	2115.15	1647.37	FRS2	1577.44	0.913411	0.633153	1.10012	1.63089	1.27021	1.21629
chr3	33798697	33869707	PDCD6IP	374	+	892.764	1001.51	777.796	1359.92	2112.53	1501.08	PDCD6IP	1337.87	1.12181	0.871222	1.52327	2.36628	1.68139	1.49857
chr7	151081085	151083418	TMUB1	36	-	48.4097	38.4327	28.6837	56.1162	49.8609	76.3261	TMUB1	55.284	0.793905	0.59252	1.15919	1.02998	1.57667	1.142
chr17	7548981	7557890	TNFSF12	22	+	48.4097	35.4184	27.3496	41.7886	49.8609	25.442	TNFSF12	44.2272	0.731638	0.564961	0.863228	1.02998	0.525556	0.913602
chrX	54807827	54816015	MAGED2	112	+	208.837	480.786	512.972	592.205	2109.9	1655.85	MAGED2	425.687	2.30221	2.45633	2.83573	10.1031	7.92891	2.03837
chr16	9091720	9121635	C16orf72	620	+	706.443	557.651	495.628	1073.37	2109.9	1655.85	C16orf72	1544.27	0.789379	0.701582	1.5194	2.98665	2.34393	2.18598
chr13	95677232	95794988	DNAJC3	257	+	638.332	705.353	890.53	1408.87	2107.28	1984.48	DNAJC3	1649.31	1.10499	1.39509	2.20711	3.30123	3.10885	2.58378
chr10	48306764	48439360	MAPK8	341	+	717.138	837.23	725.765	1124.71	2107.28	1850.91	MAPK8	1433.7	1.16746	1.01203	1.56833	2.93846	2.58097	1.9992
chr17	47531320	47623276	NPEPPS	87	+	805.514	1021.1	937.891	1696.62	2104.65	1643.13	NPEPPS	1509.25	1.26764	1.16434	2.10626	2.6128	2.03985	1.87365
chr2	74002801	74108176	TET3	202	+	521.248	509.422	444.264	884.725	2102.03	1944.2	TET3	1260.48	0.977312	0.852308	1.69732	4.03269	3.72989	2.4182
chr6	157981952	158099176	SYNJ2	143	+	709.258	819.898	617.034	1362.31	2102.03	1774.58	SYNJ2	1457.65	1.15599	0.869971	1.92075	2.9637	2.50202	2.05518
chr20	58651337	58715410	STX16-NPEPL1	132	+	612.438	893.749	715.759	1392.16	2099.41	1458.68	STX16-NPEPL1	1280.75	1.45933	1.1687	2.27314	3.42796	2.38176	2.09123
chr1	209938311	210171389	SYT14	144	+	820.712	1042.2	827.826	1480.51	2099.41	1475.64	SYT14	1312.07	1.26987	1.00867	1.80393	2.55803	1.798	1.5987
chr15	51829741	51947295	TMOD3	86	+	941.174	1045.97	1170.03	1898.4	2099.41	1592.25	TMOD3	1531.37	1.11135	1.24316	2.01706	2.23063	1.69177	1.62708
chr2	134121114	134454621	MGAT5	36	+	585.419	678.224	401.572	1381.41	2096.78	1920.87	MGAT5	1586.65	1.15853	0.685957	2.35969	3.58167	3.28119	2.71028
chr3	5122384	5180912	ARL8B	225	+	634.392	850.794	882.525	1436.33	2096.78	1766.1	ARL8B	1511.1	1.34112	1.39114	2.2641	3.30518	2.78393	2.38197
chr2	46542811	46584688	RHOQ	220	+	730.648	614.923	656.39	1123.52	2094.16	1927.23	RHOQ	1063.3	0.841613	0.898367	1.5377	2.86617	2.6377	1.45528
chr1	148748836	148750099	NUDT4B	61	+	30.3968	43.7078	32.6861	40.5947	31.4911	31.8025	NUDT4B	40.5416	1.43791	1.07531	1.33549	1.036	1.04624	1.33375
chr2	231198758	231374837	ARMC9	90	+	2201.51	1792.02	610.363	1424.4	2094.16	1772.46	ARMC9	1905.46	0.813996	0.277247	0.64701	0.951238	0.805111	0.865524
chr3	193593297	193697811	OPA1	109	+	655.219	814.622	776.462	1497.23	2088.91	1545.6	OPA1	1640.09	1.24328	1.18504	2.28508	3.18811	2.35891	2.50312
chr4	119212785	119295517	USP53	389	+	854.487	918.617	430.256	1248.88	2088.91	1295.42	USP53	1054.08	1.07505	0.503526	1.46156	2.44464	1.51602	1.23358
chr13	31846841	32299122	FRY	48	+	1329.01	1559.92	853.174	1484.09	2088.91	1617.69	FRY	1559.01	1.17375	0.641962	1.11669	1.57178	1.21721	1.17306
chr2	119759981	119984899	PTPN4	59	+	589.359	700.832	402.906	1069.79	2086.28	1785.18	PTPN4	1435.54	1.18914	0.683634	1.81518	3.53991	3.02902	2.43576
chr6	7141381	7251980	RREB1	86	+	806.64	938.21	579.011	1345.59	2086.28	1562.56	RREB1	1612.45	1.16311	0.717806	1.66814	2.58638	1.93712	1.99897
chr2	42568785	42756947	MTA3	42	+	793.693	877.17	528.314	1475.74	2083.66	1208.5	MTA3	1435.54	1.10518	0.66564	1.85933	2.62527	1.52263	1.80868
chr1	51617173	51798427	OSBPL9	156	+	1591.89	1468.73	696.414	1369.47	2083.66	1891.19	OSBPL9	1594.02	0.922633	0.437476	0.860279	1.30892	1.18802	1.00134
chr19	3366685	3469217	NFIC	155	+	1005.34	1114.55	788.469	1548.57	2081.04	1594.37	NFIC	1798.57	1.10863	0.784281	1.54034	2.06999	1.5859	1.78902
chr20	35772126	35950370	PHF20	242	+	638.332	695.556	528.314	1271.57	2075.79	1564.68	PHF20	1245.73	1.08965	0.827648	1.99202	3.2519	2.4512	1.95154
chr5	134905249	135007959	PCBD2	116	+	296.087	472.496	317.522	791.596	2073.16	1354.79	PCBD2	1426.33	1.5958	1.07239	2.67353	7.00186	4.57565	4.81727
chr16	84700088	84779922	USP10	68	+	458.203	572.723	592.352	1570.06	2067.92	1598.61	USP10	1485.3	1.24993	1.29277	3.42656	4.51311	3.48887	3.24158
chr12	13044469	13142521	FAM234B	69	+	319.729	590.809	1005.93	983.824	2062.67	1344.19	FAM234B	1203.35	1.84784	3.1462	3.07706	6.45131	4.20415	3.76366
chr10	74826677	75032624	KAT6B	162	+	1573.31	1371.52	723.097	1216.65	2062.67	1532.88	KAT6B	1490.83	0.871742	0.459602	0.773306	1.31104	0.974303	0.947575
chr20	61252338	61940617	CDH4	128	+	218.406	279.579	254.151	647.127	2060.04	1354.79	CDH4	643.137	1.28009	1.16366	2.96295	9.43216	6.20308	2.94469
chr6	70667971	70862015	SMAP1	122	+	656.345	828.187	778.463	1522.3	2060.04	1810.62	SMAP1	1730.39	1.26182	1.18606	2.31936	3.13865	2.75864	2.6364
chr10	89392709	89406487	IFIT1	584	+	94.0048	10466.5	4739.49	2775.96	2057.42	903.192	IFIT1	1601.39	111.34	50.4175	29.53	21.8863	9.60793	17.0352
chr10	102245610	102382899	GBF1	407	+	749.224	920.878	736.438	1427.98	2057.42	1628.29	GBF1	1546.11	1.22911	0.982934	1.90595	2.74607	2.1733	2.06362
chr3	14948737	15053600	NR2C2	92	+	523.5	613.416	685.741	1238.14	2054.79	1793.66	NR2C2	1308.39	1.17176	1.30992	2.36512	3.9251	3.42628	2.49931
chr6	167826992	167972023	AFDN	59	+	343.371	443.86	563.669	1203.51	2052.17	1997.2	AFDN	1542.42	1.29265	1.64157	3.50498	5.97654	5.81645	4.49199
chr4	73869437	73871242	CXCL1	28	+	39.9661	48.2293	36.0214	75.2195	41.9881	65.7252	CXCL1	75.5548	1.20676	0.901299	1.88208	1.05059	1.64452	1.89047
chr11	111602536	111730855	SIK2	83	+	879.817	987.193	639.047	1604.68	2052.17	1800.02	SIK2	1645.62	1.12204	0.726341	1.82388	2.3325	2.0459	1.87041
chr1	159010057	159055155	IFI16	200	+	1105.54	4098.73	1936.49	1964.07	2052.17	1083.41	IFI16	1212.56	3.70745	1.75162	1.77657	1.85626	0.979983	1.0968
chr19	12995582	13098796	NFIX	91	+	1705.6	2143.19	1490.89	1632.14	2052.17	1630.41	NFIX	2021.55	1.25656	0.874115	0.95693	1.2032	0.955916	1.18524
chr12	22625283	22690665	ETNK1	469	+	609.624	851.548	752.448	1382.61	2049.55	1465.04	ETNK1	1361.83	1.39684	1.23428	2.26797	3.36199	2.40319	2.23389
chr2	66435206	66573869	MEIS1	307	+	3365.03	2991.72	1274.09	1720.5	2049.55	1482	MEIS1	1512.94	0.889062	0.378627	0.511288	0.609073	0.440412	0.449607
chr8	22441145	22541142	PPP3CC	242	+	1276.66	1602.87	1287.43	1876.91	2046.92	1522.28	PPP3CC	1638.25	1.25552	1.00844	1.47017	1.60334	1.19239	1.28323
chr1	75724828	75787575	ACADM	253	+	674.921	810.855	656.39	994.569	2044.3	1694.02	ACADM	1420.8	1.20141	0.972543	1.47361	3.02895	2.50995	2.10514
chr21	36320303	36386148	MORC3	359	+	829.719	1206.49	1000.6	1641.7	2044.3	1653.73	MORC3	1590.34	1.45409	1.20595	1.97862	2.46385	1.99312	1.91672
chr1	43707623	43931165	ST3GAL3	90	+	562.34	796.536	623.037	1319.33	2041.67	1600.73	ST3GAL3	1406.06	1.41647	1.10794	2.34614	3.63067	2.84655	2.50037
chr11	66616707	66646469	RBM14-RBM4	410	+	793.693	873.402	829.16	1432.75	2041.67	1651.61	RBM14-RBM4	1839.11	1.10043	1.04469	1.80517	2.57237	2.08092	2.31716
chr2	74198695	74217565	MTHFD2	466	+	153.11	244.914	334.199	334.309	2039.05	1804.26	MTHFD2	1138.85	1.5996	2.18274	2.18346	13.3175	11.7841	7.43812
chr20	3889463	3929882	PANK2	121	+	712.072	1131.88	809.148	1565.28	2039.05	1416.27	PANK2	1627.19	1.58956	1.13633	2.1982	2.86354	1.98894	2.28515
chr8	28890493	29064764	HMBOX1	168	+	857.301	1006.79	673.734	1396.93	2039.05	1986.6	HMBOX1	1689.85	1.17437	0.785878	1.62945	2.37845	2.31727	1.97113
chr5	73626271	73941993	ARHGEF28	100	+	203.771	331.576	274.163	613.696	2033.8	1749.14	ARHGEF28	1028.28	1.6272	1.34545	3.01169	9.98081	8.58385	5.04625
chr5	133052085	133106449	HSPA4	254	+	516.745	584.78	779.13	1507.97	2033.8	1571.05	HSPA4	1463.18	1.13166	1.50776	2.91821	3.93579	3.04028	2.83153
chr1	150364272	150476566	RPRD2	141	+	740.217	866.62	553.663	1235.75	2033.8	1579.53	RPRD2	1452.13	1.17076	0.747974	1.66944	2.74757	2.13387	1.96176
chr5	132557063	132646349	RAD50	271	+	532.506	627.734	425.586	1066.21	2031.18	1670.69	RAD50	1411.58	1.17883	0.799214	2.00225	3.81438	3.13741	2.65082
chr1	28259596	28282491	SESN2	1099	+	240.922	318.012	250.816	384.455	2028.55	1812.74	SESN2	1238.36	1.31998	1.04107	1.59577	8.41995	7.52418	5.14009
chr7	66996944	67239519	TYW1	529	+	424.992	650.342	482.954	1076.95	2028.55	1486.24	TYW1	1324.97	1.53025	1.13638	2.53405	4.77315	3.4971	3.11764
chr17	82519825	82644662	FOXK2	77	+	584.856	756.597	534.985	1319.33	2025.93	1831.83	FOXK2	1605.08	1.29365	0.914729	2.25582	3.46398	3.1321	2.7444
chr12	71839845	71927248	TBC1D15	158	+	718.827	931.428	765.789	1486.48	2025.93	1863.63	TBC1D15	1503.72	1.29576	1.06533	2.06792	2.81838	2.5926	2.09191
chr14	94127779	94129519	IFI27L2	40	-	19.7016	23.3611	18.6778	28.6551	20.9941	10.6008	IFI27L2	14.7424	1.18575	0.948035	1.45446	1.0656	0.538068	0.748284
chr10	91798511	91865475	TNKS2	248	+	825.779	1045.97	903.204	1459.02	2025.93	1634.65	TNKS2	1481.61	1.26665	1.09376	1.76684	2.45336	1.97952	1.7942
chr17	77958778	78108835	TNRC6C	283	+	634.392	666.92	435.592	778.462	2023.3	1931.47	TNRC6C	1197.82	1.05127	0.686629	1.2271	3.18935	3.0446	1.88814
chr18	9914140	9960021	VAPA	168	+	991.835	1041.45	762.453	1278.73	2023.3	1624.05	VAPA	1656.68	1.05002	0.76873	1.28926	2.03996	1.63742	1.67032
chr6	20401982	20493714	E2F3	210	+	543.201	724.946	615.032	1602.3	2020.68	1494.72	E2F3	2073.15	1.33458	1.13224	2.94974	3.71995	2.75169	3.81654
chr10	135012	254637	ZMYND11	48	+	884.883	963.832	837.832	1502	2018.05	1679.17	ZMYND11	1706.43	1.08922	0.946828	1.6974	2.28058	1.89762	1.92842
chr2	178194593	178402893	OSBPL6	104	+	131.719	250.943	376.224	469.227	2015.43	1657.97	OSBPL6	908.5	1.90514	2.85626	3.56233	15.301	12.5872	6.89726
chr5	33441059	33469539	TARS	469	+	218.406	363.98	562.334	773.687	2010.18	1655.85	TARS	1453.97	1.66653	2.57472	3.54243	9.20387	7.58152	6.65719
chr18	36297794	36780055	FHOD3	104	+	694.622	913.342	599.023	1419.62	2010.18	1721.58	FHOD3	1297.33	1.31488	0.862373	2.04373	2.89392	2.47844	1.86768
chr9	125261913	125367207	GAPVD1	72	+	596.677	746.046	626.373	1308.58	2004.93	1613.45	GAPVD1	1395	1.25033	1.04977	2.19311	3.36016	2.70406	2.33795
chr1	22052790	22101360	CDC42	315	+	695.748	750.568	730.434	1370.67	2004.93	1460.8	CDC42	1601.39	1.07879	1.04985	1.97007	2.88169	2.09961	2.30168
chr19	10961139	11079426	SMARCA4	38	+	575.287	619.445	397.57	1150.98	1999.68	1664.33	SMARCA4	1299.17	1.07676	0.691081	2.00071	3.47597	2.89304	2.2583
chr4	41990620	42090461	SLC30A9	268	+	703.629	887.72	655.056	1250.08	1999.68	1551.96	SLC30A9	1437.38	1.26163	0.930968	1.77662	2.84195	2.20565	2.04281
chr1	180632133	180890251	XPR1	187	+	757.667	1103.24	1006.6	1564.09	1999.68	1537.12	XPR1	1481.61	1.4561	1.32855	2.06435	2.63926	2.02875	1.95549
chr7	816729	896435	SUN1	148	+	629.888	775.436	948.564	1609.46	1997.06	1802.14	SUN1	1676.95	1.23107	1.50592	2.55515	3.1705	2.86105	2.6623
chr18	12991450	13125052	CEP192	130	+	618.63	817.637	445.598	1098.44	1991.81	1342.07	CEP192	1450.28	1.32169	0.720298	1.7756	3.21971	2.16942	2.34434
chr1	146938419	146996202	NBPF12	171	+	752.038	904.299	643.716	1401.71	1991.81	1647.37	NBPF12	1455.81	1.20246	0.855962	1.86388	2.64855	2.19054	1.93582
chr4	151099708	151104642	RPS3A	169	+	233.605	257.725	456.938	747.42	1989.19	1257.26	RPS3A	1103.84	1.10325	1.95603	3.1995	8.51519	5.38199	4.72524
chr20	33993960	34108308	RALY	174	+	764.985	790.508	761.119	1431.56	1989.19	1829.71	RALY	1531.37	1.03336	0.994946	1.87136	2.6003	2.39182	2.00183
chr1	157993716	158100262	KIRREL1	57	+	1202.92	1345.9	751.113	1610.65	1989.19	1367.51	KIRREL1	1371.04	1.11886	0.624408	1.33895	1.65363	1.13683	1.13976
chr5	62412845	62628582	IPO11	134	+	694.622	972.121	660.393	1381.41	1983.94	1749.14	IPO11	1573.75	1.3995	0.950723	1.98872	2.85614	2.51812	2.26562
chr1	10033054	10181239	UBE4B	69	+	753.164	854.562	524.979	1185.6	1981.31	1679.17	UBE4B	1535.05	1.13463	0.697031	1.57416	2.63065	2.22949	2.03814
chr5	52989435	53094779	ITGA2	53	+	133.408	449.135	693.079	2208.83	1978.69	1342.07	ITGA2	1195.98	3.36663	5.19518	16.557	14.8319	10.0599	8.96483
chr5	121962086	122075570	SRFBP1	179	+	428.932	633.763	565.67	1316.94	1978.69	1770.34	SRFBP1	1430.01	1.47754	1.31879	3.07028	4.61306	4.12732	3.33389
chr5	172834459	172952683	ERGIC1	46	+	603.432	669.181	316.188	1358.73	1978.69	1689.77	ERGIC1	1431.86	1.10896	0.523983	2.25167	3.27906	2.80027	2.37286
chr20	52972420	53495330	TSHZ2	37	+	1407.26	1296.16	295.509	591.011	1973.44	1638.89	TSHZ2	1284.43	0.921052	0.209989	0.419973	1.40233	1.1646	0.912717
chr12	116911071	117031148	FBXW8	112	+	721.642	799.551	614.365	1085.31	1970.82	1672.81	FBXW8	1402.37	1.10796	0.851343	1.50395	2.73102	2.31806	1.9433
chr5	142770466	143229011	ARHGAP26	135	+	755.979	1052.75	860.512	1207.09	1970.82	1636.77	ARHGAP26	1050.4	1.39257	1.13828	1.59672	2.60698	2.1651	1.38946
chr6	32128707	32130198	FKBPL	55	-	24.2048	47.4757	29.3508	33.4309	26.2426	25.442	FKBPL	20.2708	1.96142	1.2126	1.38117	1.08419	1.05111	0.83747
chr8	132775460	132848807	PHF20L1	157	+	773.992	919.37	603.025	1024.42	1970.82	1560.44	PHF20L1	1352.62	1.18783	0.77911	1.32355	2.54631	2.01609	1.74759
[truncated: 10,889 more rows]

## Sheet: Flavo Pause Reg
Chromosome	Flavo Pause region left	Flavo Pause region right	Genename	Strength	Strand	Uninf Pause region	4hpi Pause region	12hpi Pause region	24hpi Pause region	48hpi Pause region	72hpi Pause region	72hpi Flavo PFA Pause region	4hpi Pause region/Uninf Pause region	12hpi Pause region/Uninf Pause region	24hpi Pause region/Uninf Pause region	28hpi Pause region/Uninf Pause region	72hpi Pause region/Uninf Pause region	72hpi PFA Pause region/Uninf Pause region
[truncated: 11,593 more rows]

[truncated: 3 more sheets: tRNA analyses, GO-Terms, BioPlanet Pathways]
